# Supplementary material
Source: MDPI journal article supplement (https://www.mdpi.com/2304-6740/9/4/24)

# checkCIF/PLATON report

Structure factors have been supplied for datablock(s) I

THIS REPORT IS FOR GUIDANCE ONLY. IF USED AS PART OF A REVIEW PROCEDURE FOR PUBLICATION, IT SHOULD NOT REPLACE THE EXPERTISE OF AN EXPERIENCED CRYSTALLOGRAPHIC REFEREE.

No syntax errors found.      CIF dictionary      Interpreting this report

## Datablock: I

---

Bond precision:    C-C = 0.0113 Å                      Wavelength=0.71073

Cell:                      a=8.431(3)              b=35.524(14)              c=13.404(5)  
                            alpha=90              beta=99.315(4)              gamma=90  
Temperature:              100 K

|                        | Calculated                                        | Reported                                          |
|------------------------|---------------------------------------------------|---------------------------------------------------|
| Volume                 | 3962(3)                                           | 3962(3)                                           |
| Space group            | P 21/c                                            | P 21/c                                            |
| Hall group             | -P 2ybc                                           | -P 2ybc                                           |
| Moiety formula         | 2(C36 H24 N7 O2 Ru), 2(F6 P), 2(C4 H8 O2), C H4 O | 2(C36 H24 N7 O2 Ru), 2(F6 P), 2(C4 H8 O2), C H4 O |
| Sum formula            | C81 H68 F12 N14 O9 P2 Ru2                         | C40.50 H34 F6 N7 O4.50 P Ru                       |
| Mr                     | 1873.57                                           | 936.78                                            |
| Dx, g cm <sup>-3</sup> | 1.571                                             | 1.571                                             |
| Z                      | 2                                                 | 4                                                 |
| Mu (mm <sup>-1</sup> ) | 0.518                                             | 0.518                                             |
| F000                   | 1900.0                                            | 1900.0                                            |
| F000'                  | 1896.35                                           |                                                   |
| h,k,lmax               | 10,46,17                                          | 10,46,17                                          |
| Nref                   | 9083                                              | 9017                                              |
| Tmin,Tmax              | 0.911,0.950                                       | 0.649,0.746                                       |
| Tmin'                  | 0.902                                             |                                                   |

Correction method= # Reported T Limits: Tmin=0.649 Tmax=0.746  
AbsCorr = EMPIRICAL

Data completeness= 0.993                      Theta(max)= 27.499

R(reflections)= 0.0773( 4890)              wR2(reflections)= 0.2437( 9017)

S = 1.032                      Npar= 553

---

The following ALERTS were generated. Each ALERT has the format

**test-name\_ALERT\_alert-type\_alert-level.**

Click on the hyperlinks for more details of the test.

### Alert level B

|                   |                                        |    |       |     |              |
|-------------------|----------------------------------------|----|-------|-----|--------------|
| PLAT420_ALERT_2_B | D-H Without Acceptor                   | O5 | --H45 | .   | Please Check |
| PLAT973_ALERT_2_B | Check Calcd Positive Resid. Density on |    |       | Ru1 | 1.66 eA-3    |

### Alert level C

|                   |                                                  |                                           |          |         |        |
|-------------------|--------------------------------------------------|-------------------------------------------|----------|---------|--------|
| PLAT214_ALERT_2_C | Atom C40                                         | (Anion/Solvent) ADP max/min Ratio         |          | 4.3     | prolat |
| PLAT244_ALERT_4_C | Low                                              | 'Solvent' Ueq as Compared to Neighbors of |          | C37     | Check  |
| PLAT244_ALERT_4_C | Low                                              | 'Solvent' Ueq as Compared to Neighbors of |          | C39     | Check  |
| PLAT250_ALERT_2_C | Large U3/U1 Ratio for Average U(i,j) Tensor .... |                                           |          | 2.6     | Note   |
| PLAT250_ALERT_2_C | Large U3/U1 Ratio for Average U(i,j) Tensor .... |                                           |          | 3.3     | Note   |
| PLAT260_ALERT_2_C | Large Average Ueq of Residue Including           | O3                                        |          | 0.113   | Check  |
| PLAT260_ALERT_2_C | Large Average Ueq of Residue Including           | O5                                        |          | 0.176   | Check  |
| PLAT342_ALERT_3_C | Low Bond Precision on C-C Bonds .....            |                                           |          | 0.01131 | Ang.   |
| PLAT906_ALERT_3_C | Large K Value in the Analysis of Variance .....  |                                           |          | 4.485   | Check  |
| PLAT911_ALERT_3_C | Missing FCF Refl Between Thmin & STh/L=          | 0.600                                     |          | 5       | Report |
| PLAT934_ALERT_3_C | Number of (Iobs-Icalc)/Sigma(W) > 10 Outliers .. |                                           |          | 1       | Check  |
| PLAT971_ALERT_2_C | Check Calcd Resid. Dens.                         | 1.44A                                     | From C41 | 1.52    | eA-3   |
| PLAT975_ALERT_2_C | Check Calcd Resid. Dens.                         | 0.68A                                     | From O5  | 0.94    | eA-3   |
| PLAT975_ALERT_2_C | Check Calcd Resid. Dens.                         | 0.99A                                     | From O5  | 0.73    | eA-3   |
| PLAT975_ALERT_2_C | Check Calcd Resid. Dens.                         | 1.05A                                     | From O5  | 0.61    | eA-3   |
| PLAT975_ALERT_2_C | Check Calcd Resid. Dens.                         | 0.94A                                     | From O5  | 0.45    | eA-3   |

### Alert level G

FORMU01\_ALERT\_1\_G There is a discrepancy between the atom counts in the  
 \_chemical\_formula\_sum and \_chemical\_formula\_moiety. This is  
 usually due to the moiety formula being in the wrong format.  
 Atom count from \_chemical\_formula\_sum: C40.5 H34 F6 N7 O4.5 P1 Ru1  
 Atom count from \_chemical\_formula\_moiety: C81 H68 F12 N14 O9 P2 Ru2

|                   |                                                  |                   |   |       |        |
|-------------------|--------------------------------------------------|-------------------|---|-------|--------|
| PLAT002_ALERT_2_G | Number of Distance or Angle Restraints on AtSite |                   |   | 4     | Note   |
| PLAT003_ALERT_2_G | Number of Uiso or Uij Restrained non-H Atoms ... |                   |   | 2     | Report |
| PLAT007_ALERT_5_G | Number of Unrefined Donor-H Atoms .....          |                   |   | 1     | Report |
| PLAT045_ALERT_1_G | Calculated and Reported Z Differ by a Factor ... |                   |   | 0.50  | Check  |
| PLAT172_ALERT_4_G | The CIF-Embedded .res File Contains DFIX Records |                   |   | 1     | Report |
| PLAT173_ALERT_4_G | The CIF-Embedded .res File Contains DANG Records |                   |   | 1     | Report |
| PLAT178_ALERT_4_G | The CIF-Embedded .res File Contains SIMU Records |                   |   | 1     | Report |
| PLAT187_ALERT_4_G | The CIF-Embedded .res File Contains RIGU Records |                   |   | 1     | Report |
| PLAT244_ALERT_4_G | Low 'Solvent' Ueq as Compared to Neighbors of    |                   |   | P1    | Check  |
| PLAT300_ALERT_4_G | Atom Site Occupancy of O5                        | Constrained at    |   | 0.5   | Check  |
| PLAT300_ALERT_4_G | Atom Site Occupancy of C41                       | Constrained at    |   | 0.5   | Check  |
| PLAT300_ALERT_4_G | Atom Site Occupancy of H45                       | Constrained at    |   | 0.5   | Check  |
| PLAT300_ALERT_4_G | Atom Site Occupancy of H46                       | Constrained at    |   | 0.5   | Check  |
| PLAT300_ALERT_4_G | Atom Site Occupancy of H47                       | Constrained at    |   | 0.5   | Check  |
| PLAT300_ALERT_4_G | Atom Site Occupancy of H48                       | Constrained at    |   | 0.5   | Check  |
| PLAT302_ALERT_4_G | Anion/Solvent/Minor-Residue Disorder (Resd 4 )   |                   |   | 100%  | Note   |
| PLAT333_ALERT_2_G | Large Aver C6-Ring C-C Dist C7                   | -C16              | . | 1.44  | Ang.   |
| PLAT432_ALERT_2_G | Short Inter X...Y Contact O5                     | ..C41             |   | 2.34  | Ang.   |
|                   |                                                  | 1-x,1-y,2-z =     |   | 3_667 | Check  |
| PLAT432_ALERT_2_G | Short Inter X...Y Contact C41                    | ..C41             |   | 1.41  | Ang.   |
|                   |                                                  | 1-x,1-y,2-z =     |   | 3_667 | Check  |
| PLAT779_ALERT_4_G | Suspect or Irrelevant (Bond) Angle(s) in CIF . # |                   |   | 188   | Check  |
|                   | H47 -C41 -H48                                    | 1.555 1.555 3.667 |   | 29.80 | Deg.   |
| PLAT790_ALERT_4_G | Centre of Gravity not Within Unit Cell: Resd. #  |                   |   | 3     | Note   |
|                   | C4 H8 O2                                         |                   |   |       |        |
| PLAT794_ALERT_5_G | Tentative Bond Valency for Ru1                   | (III)             | . | 3.05  | Info   |

|                   |                                                  |     |              |
|-------------------|--------------------------------------------------|-----|--------------|
| PLAT860_ALERT_3_G | Number of Least-Squares Restraints .....         | 11  | Note         |
| PLAT883_ALERT_1_G | No Info/Value for _atom_sites_solution_primary . |     | Please Do !  |
| PLAT910_ALERT_3_G | Missing # of FCF Reflection(s) Below Theta(Min). | 1   | Note         |
| PLAT912_ALERT_4_G | Missing # of FCF Reflections Above STh/L= 0.600  | 60  | Note         |
| PLAT941_ALERT_3_G | Average HKL Measurement Multiplicity .....       | 2.6 | Low          |
| PLAT960_ALERT_3_G | Number of Intensities with I < - 2*sig(I) ...    | 26  | Check        |
| PLAT965_ALERT_2_G | The SHELXL WEIGHT Optimisation has not Converged |     | Please Check |
| PLAT978_ALERT_2_G | Number C-C Bonds with Positive Residual Density. | 0   | Info         |

---

0 **ALERT level A** = Most likely a serious problem - resolve or explain  
 2 **ALERT level B** = A potentially serious problem, consider carefully  
 16 **ALERT level C** = Check. Ensure it is not caused by an omission or oversight  
 31 **ALERT level G** = General information/check it is not something unexpected

3 **ALERT type 1** CIF construction/syntax error, inconsistent or missing data  
 19 **ALERT type 2** Indicator that the structure model may be wrong or deficient  
 8 **ALERT type 3** Indicator that the structure quality may be low  
 17 **ALERT type 4** Improvement, methodology, query or suggestion  
 2 **ALERT type 5** Informative message, check

---

## checkCIF publication errors

---

### Alert level A

PUBL004\_ALERT\_1\_A The contact author's name and address are missing,  
     \_publ\_contact\_author\_name and \_publ\_contact\_author\_address.  
 PUBL005\_ALERT\_1\_A \_publ\_contact\_author\_email, \_publ\_contact\_author\_fax and  
     \_publ\_contact\_author\_phone are all missing.  
     At least one of these should be present.  
 PUBL006\_ALERT\_1\_A \_publ\_requested\_journal is missing  
     e.g. 'Acta Crystallographica Section C'  
 PUBL008\_ALERT\_1\_A \_publ\_section\_title is missing. Title of paper.  
 PUBL009\_ALERT\_1\_A \_publ\_author\_name is missing. List of author(s) name(s).  
 PUBL010\_ALERT\_1\_A \_publ\_author\_address is missing. Author(s) address(es).  
 PUBL012\_ALERT\_1\_A \_publ\_section\_abstract is missing.  
     Abstract of paper in English.

---

### Alert level G

PUBL017\_ALERT\_1\_G The \_publ\_section\_references section is missing or  
     empty.

---

7 **ALERT level A** = Data missing that is essential or data in wrong format  
 1 **ALERT level G** = General alerts. Data that may be required is missing

---

## Publication of your CIF

You should attempt to resolve as many as possible of the alerts in all categories. Often the minor alerts point to easily fixed oversights, errors and omissions in your CIF or refinement strategy, so attention to these fine details can be worthwhile. In order to resolve some of the more serious problems it may be necessary to carry out additional measurements or structure refinements. However, the nature of your study may justify the reported deviations from journal submission requirements and the more serious of these should be commented upon in the discussion or experimental section of a paper or in the "special\_details" fields of the CIF. *checkCIF* was carefully designed to identify outliers and unusual parameters, but every test has its limitations and alerts that are not important in a particular case may appear. Conversely, the absence of alerts does not guarantee there are no aspects of the results needing attention. It is up to the individual to critically assess their own results and, if necessary, seek expert advice.

If level A alerts remain, which you believe to be justified deviations, and you intend to submit this CIF for publication in a journal, you should additionally insert an explanation in your CIF using the Validation Reply Form (VRF) below. This will allow your explanation to be considered as part of the review process.

## Validation response form

Please find below a validation response form (VRF) that can be filled in and pasted into your CIF.

```
# start Validation Reply Form
_vrf_PUBL004_GLOBAL
;
PROBLEM: The contact author's name and address are missing,
RESPONSE: ...
;
_vrf_PUBL005_GLOBAL
;
PROBLEM: _publ_contact_author_email, _publ_contact_author_fax and
RESPONSE: ...
;
_vrf_PUBL006_GLOBAL
;
PROBLEM: _publ_requested_journal is missing
RESPONSE: ...
;
_vrf_PUBL008_GLOBAL
;
PROBLEM: _publ_section_title is missing. Title of paper.
RESPONSE: ...
;
_vrf_PUBL009_GLOBAL
;
PROBLEM: _publ_author_name is missing. List of author(s) name(s).
RESPONSE: ...
;
_vrf_PUBL010_GLOBAL
;
PROBLEM: _publ_author_address is missing. Author(s) address(es).
RESPONSE: ...
;
_vrf_PUBL012_GLOBAL
;
```

PROBLEM: \_publ\_section\_abstract is missing.  
RESPONSE: ...  
;  
# end Validation Reply Form

If you wish to submit your CIF for publication in Acta Crystallographica Section C or E, you should upload your CIF via the web. If you wish to submit your CIF for publication in IUCrData you should upload your CIF via the web. If your CIF is to form part of a submission to another IUCr journal, you will be asked, either during electronic submission or by the Co-editor handling your paper, to upload your CIF via our web site.

---

**PLATON version of 05/12/2020; check.def file version of 05/12/2020**

Datablock I - ellipsoid plot

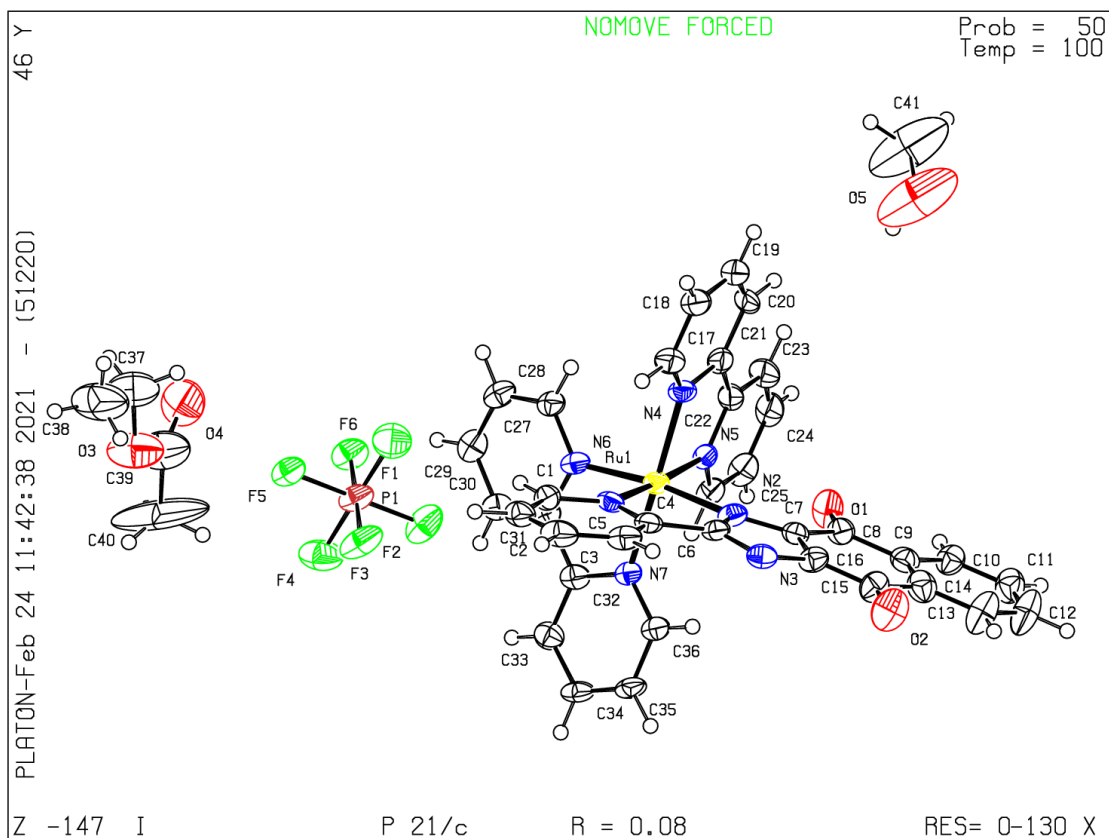

Supplement: s1 [file s1]
