# Supplementary material
Source: MDPI journal article supplement (https://www.mdpi.com/2304-6740/9/4/24)
Supplement: s1 [file s1]

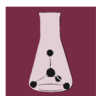

# Supplementary Materials: Synthesis of a Ru(II) Complex with a Naphthoquinone-Annelated Imidazole Ligand Exhibiting Proton-Responsive Redox and Luminescent Behavior

Takuya Shiga \*, Minami Tachibana, Hiroki Oshio and Masayuki Nihei

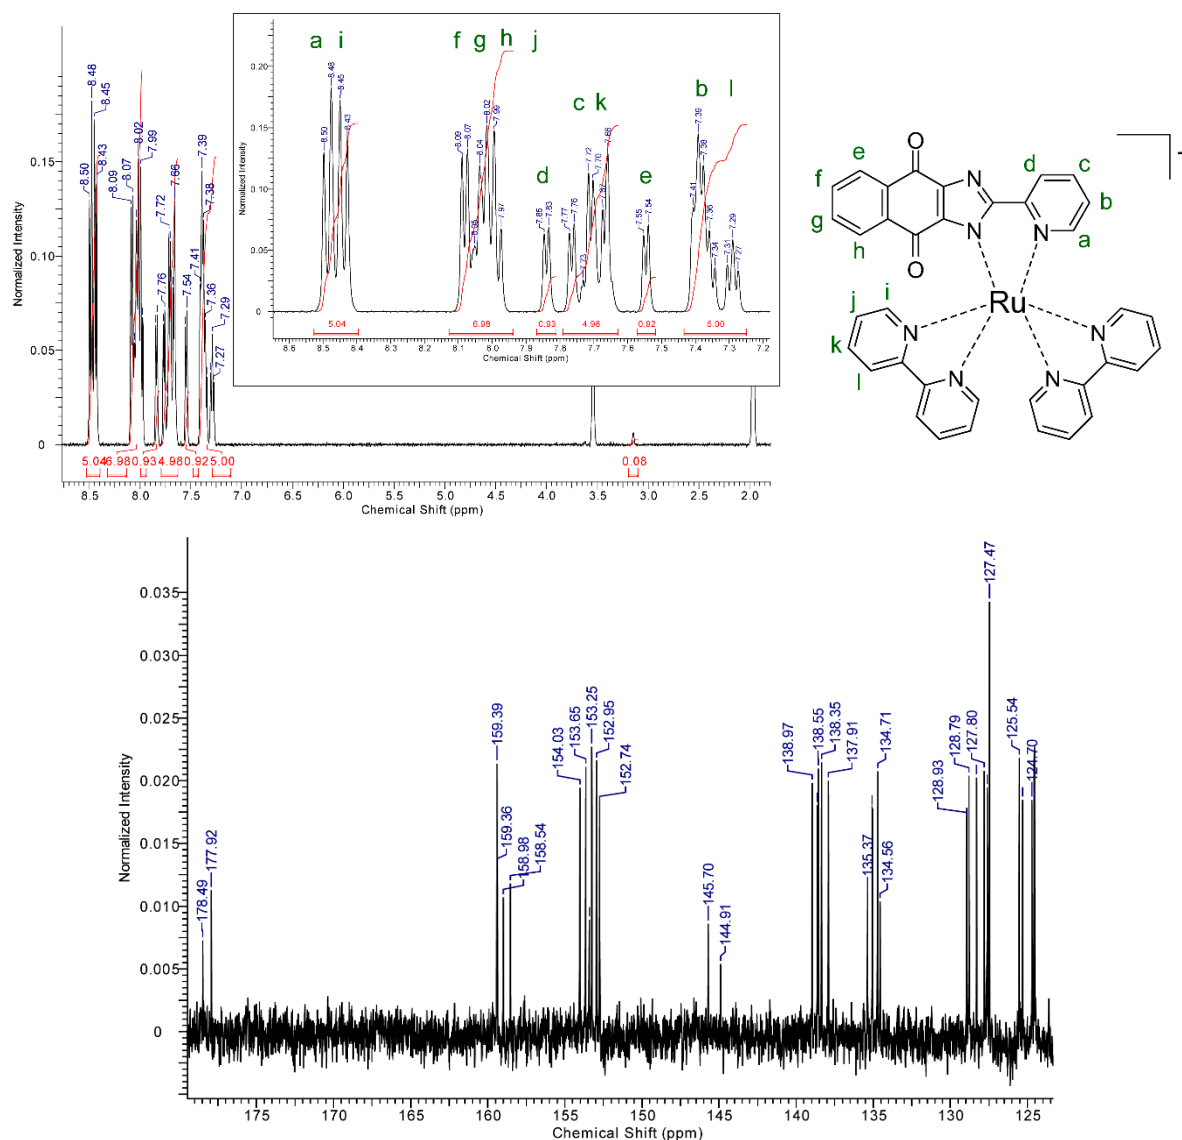

Figure S1.  $^1\text{H}$  and  $^{13}\text{C}$  NMR spectra of **1** in  $\text{CD}_3\text{CN}-d_3$ .

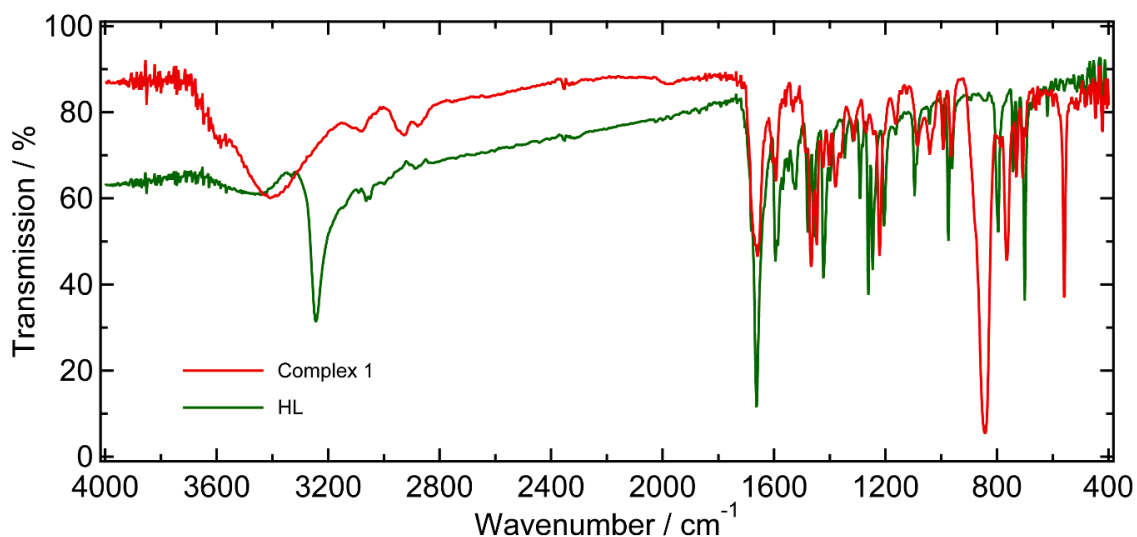

**Figure S2.** IR spectra of HL (green) and complex **1** (red).

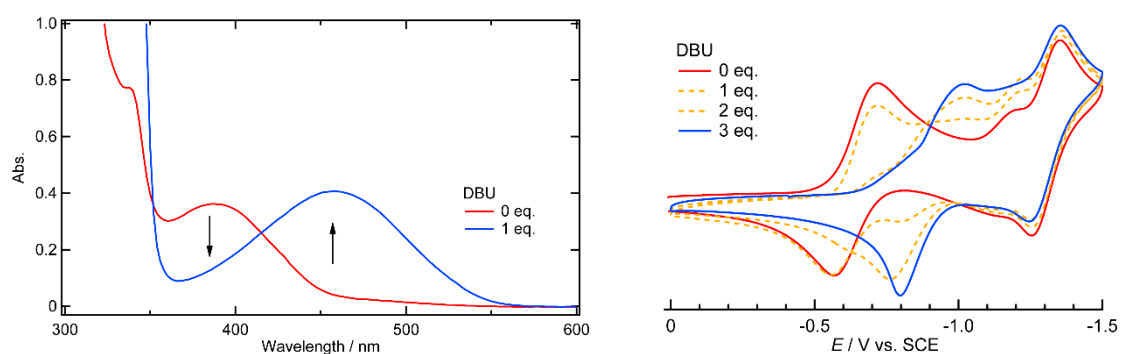

**Figure S3.** UV-Vis absorption spectra of HL and  $L^-$  in DMF (left) and cyclic voltammograms of HL and  $L^-$  in  $CH_2Cl_2$  (left).

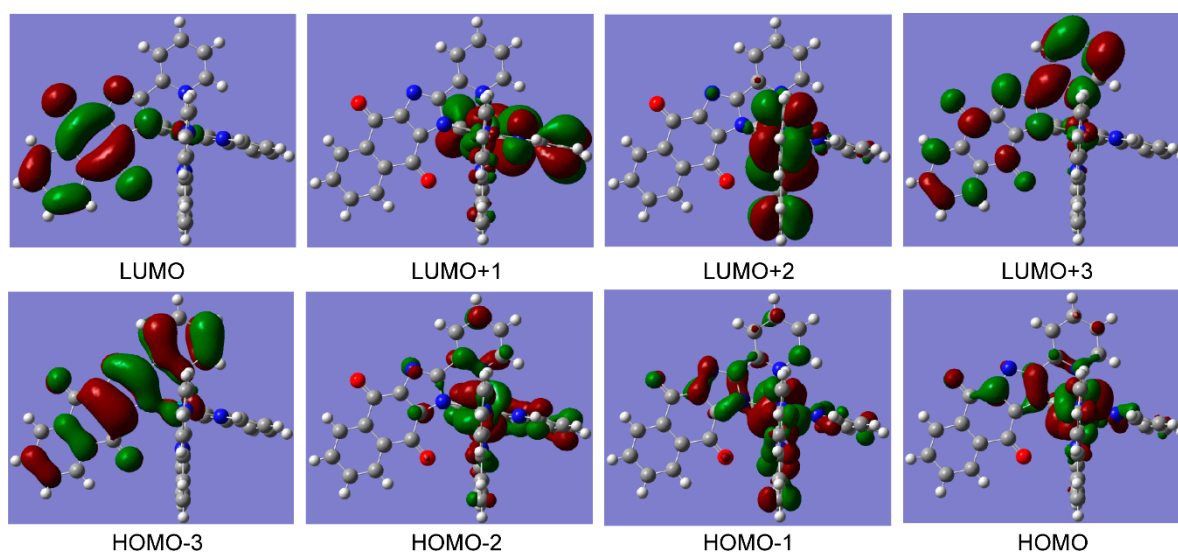

**Figure S4.** Calculated frontier orbitals for the optical transitions observed in **1**. Orbitals are shown with an iso-value of 0.06.

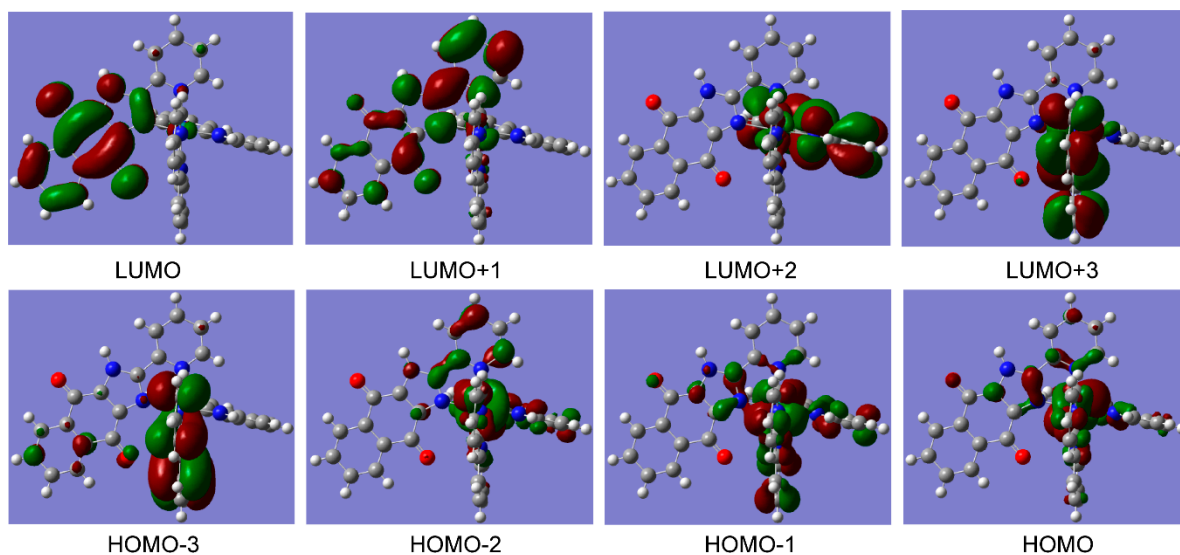

**Figure S5** Calculated frontier orbitals for the optical transitions observed in  $\text{H}^+\text{-1}$ . Orbitals are shown with an iso-value of 0.06.

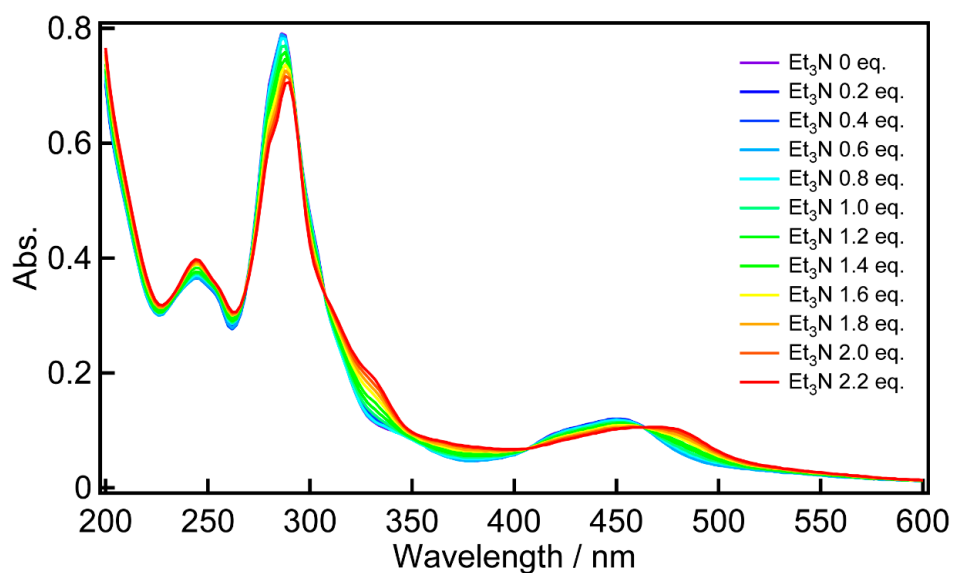

**Figure S6** UV-Vis absorption spectral changes of complex **1** with  $\text{Et}_3\text{N}$  after addition of 1.6 eq.  $\text{TfOH}$ .

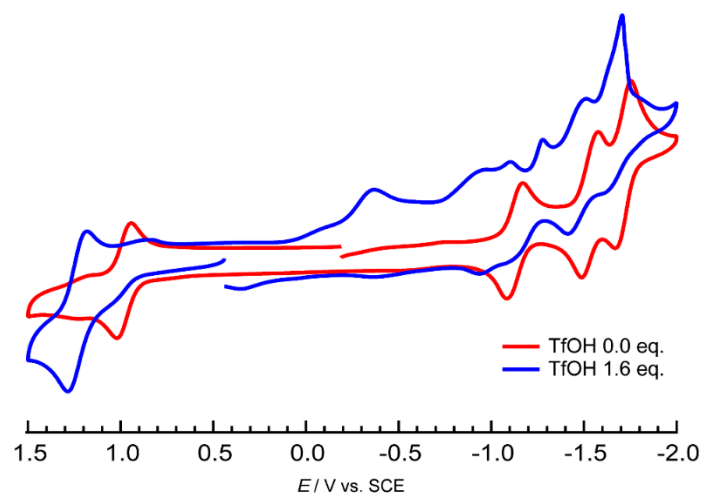

**Figure S7** Cyclic voltammograms of complex **1** in acetonitrile before and after the addition of 1.6 eq. of  $\text{TfOH}$ .

**Table S1.** Main TD-DFT calculated transition of **1** compared with experimental data.

| Main contributing<br>excitation | Transition<br>wavelength<br>(nm) | Oscillator<br>strength | Exp. Transition<br>Wavelength<br>(nm) |                         |
|---------------------------------|----------------------------------|------------------------|---------------------------------------|-------------------------|
| HOMO-2 → LUMO                   | 529.28                           | 0.0419                 | 478                                   | MLCT Ru/L <sup>-</sup>  |
| HOMO-1 → LUMO                   |                                  |                        |                                       | MLCT Ru/L <sup>-</sup>  |
| HOMO → LUMO                     |                                  |                        |                                       | MLCT Ru/L <sup>-</sup>  |
| HOMO-2 → LUMO+1                 | 525.73                           | 0.0477                 | 478                                   | MLCT Ru/L <sup>-</sup>  |
| HOMO-2 → LUMO+2                 |                                  |                        |                                       | MLCT Ru/ L <sup>-</sup> |
| HOMO-2 → LUMO+1                 | 434.32                           | 0.0659                 | 450 sh                                | MLCT Ru/bpy             |
| HOMO-2 → LUMO+2                 |                                  |                        |                                       | MLCT Ru/bpy             |
| HOMO → LUMO+3                   |                                  |                        |                                       | MLCT Ru/bpy             |
| HOMO-2 → LUMO+1                 | 428.01                           | 0.0814                 | 450 sh                                | MLCT Ru/bpy             |
| HOMO-2 → LUMO+2                 |                                  |                        |                                       | MLCT Ru/bpy             |
| HOMO-1 → LUMO+1                 |                                  |                        |                                       | MLCT Ru/bpy             |
| HOMO-1 → LUMO+2                 |                                  |                        |                                       | MLCT Ru/bpy             |

**Table S2.** Main TD-DFT calculated transition of H<sup>+</sup>-**1** compared with experimental data.

| Main contributing<br>excitation | Transition<br>wavelength<br>(nm) | Oscillator<br>strength | Exp. Transition<br>Wavelength<br>(nm) |             |
|---------------------------------|----------------------------------|------------------------|---------------------------------------|-------------|
| HOMO-2 → LUMO                   | 618.90                           | 0.0577                 | 450                                   | MLCT Ru/HL  |
| HOMO-1 → LUMO                   |                                  |                        |                                       | MLCT Ru/HL  |
| HOMO → LUMO                     |                                  |                        |                                       | MLCT Ru/bpy |
| HOMO-2 → LUMO+1                 | 437.37                           | 0.1160                 | 420 sh                                | MLCT Ru/HL  |
| HOMO-2 → LUMO+2                 |                                  |                        |                                       | MLCT Ru/bpy |
| HOMO-1 → LUMO+1                 |                                  |                        |                                       | MLCT Ru/HL  |
| HOMO-1 → LUMO+3                 |                                  |                        |                                       | MLCT Ru/bpy |
| HOMO-2 → LUMO+2                 | 404.02                           | 0.1399                 | 420 sh                                | MLCT Ru/bpy |
| HOMO-2 → LUMO+3                 |                                  |                        |                                       | MLCT Ru/bpy |
| HOMO-1 → LUMO+2                 |                                  |                        |                                       | MLCT Ru/bpy |
| HOMO-1 → LUMO+3                 |                                  |                        |                                       | MLCT Ru/bpy |

**Table S3.** Cartesian coordinates of geometry optimized 1.

| Atom | Coordinates in Å |           |           |
|------|------------------|-----------|-----------|
|      | X                | Y         | Z         |
| Ru   | 1.043811         | 0.032108  | 0.156844  |
| N    | 1.431936         | 1.954103  | 0.846293  |
| N    | -0.883348        | 0.762074  | 0.425296  |
| N    | -2.131872        | 2.591533  | 0.988671  |
| N    | 0.9052           | -0.814998 | 2.009796  |
| N    | 0.604818         | -1.905391 | -0.333538 |
| N    | 2.977999         | -0.47849  | -0.287126 |
| N    | 1.237523         | 0.815902  | -1.726633 |
| O    | -2.194748        | -1.754261 | -0.709211 |
| O    | -5.036776        | 2.708934  | 0.591073  |
| C    | 2.643705         | 2.519956  | 0.95891   |
| H    | 3.410195         | 2.000205  | 0.751175  |
| C    | 2.819498         | 3.825193  | 1.365032  |
| H    | 3.69086          | 4.202138  | 1.405518  |
| C    | 1.709412         | 4.578956  | 1.713031  |
| H    | 1.809755         | 5.474313  | 2.015925  |
| C    | 0.46125          | 4.008063  | 1.609448  |
| H    | -0.312893        | 4.502082  | 1.847015  |
| C    | 0.34751          | 2.708354  | 1.155386  |
| C    | -0.925545        | 2.047097  | 0.916324  |
| C    | -2.196053        | 0.479152  | 0.170898  |
| C    | -2.824371        | -0.723007 | -0.390956 |
| C    | -4.28945         | -0.633924 | -0.612691 |
| C    | -4.949416        | -1.74627  | -1.159732 |
| H    | -4.453657        | -2.528993 | -1.374404 |
| C    | -6.294773        | -1.715738 | -1.387568 |
| H    | -6.734425        | -2.474305 | -1.754433 |
| C    | -7.019568        | -0.581523 | -1.081792 |
| H    | -7.952925        | -0.562231 | -1.251294 |
| C    | -6.404092        | 0.521768  | -0.536806 |
| H    | -6.915093        | 1.294643  | -0.328309 |
| C    | -5.041531        | 0.508943  | -0.290493 |
| C    | -4.36305         | 1.713293  | 0.300727  |
| C    | -2.970381        | 1.614179  | 0.50484   |
| C    | 1.046423         | -0.161792 | 3.197376  |
| H    | 1.341019         | 0.74166   | 3.194947  |
| C    | 0.771853         | -0.765985 | 4.397865  |

|   |           |           |           |
|---|-----------|-----------|-----------|
| H | 0.863466  | -0.280759 | 5.209289  |
| C | 0.366453  | -2.07393  | 4.418258  |
| H | 0.166062  | -2.500226 | 5.244087  |
| C | 0.24871   | -2.7652   | 3.238093  |
| H | -0.022382 | -3.676051 | 3.243571  |
| C | 0.531481  | -2.130666 | 2.03015   |
| C | 0.411548  | -2.75747  | 0.700212  |
| C | 0.120484  | -4.090408 | 0.504041  |
| H | -0.056163 | -4.655748 | 1.248746  |
| C | 0.083077  | -4.59643  | -0.770619 |
| H | -0.081862 | -5.519648 | -0.920447 |
| C | 0.289611  | -3.745515 | -1.823953 |
| H | 0.250964  | -4.068172 | -2.717508 |
| C | 0.561045  | -2.401699 | -1.574763 |
| H | 0.716385  | -1.819221 | -2.308668 |
| C | 3.827472  | -1.194811 | 0.506251  |
| H | 3.542419  | -1.433687 | 1.380796  |
| C | 5.070905  | -1.581297 | 0.093722  |
| H | 5.650847  | -2.038837 | 0.691774  |
| C | 5.475601  | -1.306922 | -1.186346 |
| H | 6.330887  | -1.58561  | -1.491235 |
| C | 4.616364  | -0.610906 | -2.033943 |
| H | 4.865531  | -0.439023 | -2.934128 |
| C | 3.398674  | -0.176553 | -1.55304  |
| C | 2.440805  | 0.617299  | -2.332985 |
| C | 2.718064  | 1.192015  | -3.560503 |
| H | 3.561895  | 1.050131  | -3.971016 |
| C | 1.76425   | 1.970213  | -4.189182 |
| H | 1.939262  | 2.35275   | -5.04119  |
| C | 0.563687  | 2.182805  | -3.564577 |
| H | -0.097023 | 2.730286  | -3.972463 |
| C | 0.313518  | 1.599652  | -2.341334 |
| H | -0.523453 | 1.749677  | -1.918795 |

**Table S4** Cartesian coordinates of geometry optimized H<sup>+</sup>-1.

| Atom | Coordinates in Å |           |           |
|------|------------------|-----------|-----------|
|      | X                | Y         | Z         |
| Ru   | 1.050209         | 0.029731  | 0.154466  |
| N    | 1.426702         | 1.962166  | 0.820792  |
| N    | -0.881345        | 0.752391  | 0.410829  |
| N    | -2.140759        | 2.58179   | 0.949623  |
| N    | 0.91314          | -0.795236 | 2.017494  |
| N    | 0.622601         | -1.916034 | -0.312699 |
| N    | 2.987886         | -0.475704 | -0.280095 |
| N    | 1.242773         | 0.791318  | -1.738217 |
| O    | -2.177119        | -1.784864 | -0.694668 |
| O    | -5.045596        | 2.678387  | 0.545979  |
| C    | 2.635179         | 2.535986  | 0.928359  |
| H    | 3.404836         | 2.017918  | 0.728267  |
| C    | 2.803179         | 3.847068  | 1.318643  |
| H    | 3.672404         | 4.229246  | 1.355869  |
| C    | 1.688424         | 4.598974  | 1.655557  |
| H    | 1.78338          | 5.498529  | 1.947552  |
| C    | 0.443567         | 4.020027  | 1.557028  |
| H    | -0.333653        | 4.512691  | 1.787254  |
| C    | 0.337668         | 2.714221  | 1.118838  |
| C    | -0.931363        | 2.043113  | 0.885914  |
| C    | -2.192064        | 0.459178  | 0.157845  |
| C    | -2.812884        | -0.75323  | -0.390151 |
| C    | -4.278056        | -0.674902 | -0.615302 |
| C    | -4.931038        | -1.797496 | -1.149644 |
| H    | -4.430663        | -2.580078 | -1.353862 |
| C    | -6.276161        | -1.777135 | -1.379983 |
| H    | -6.711061        | -2.542557 | -1.738171 |
| C    | -7.007637        | -0.643223 | -1.089364 |
| H    | -7.940802        | -0.631128 | -1.260578 |
| C    | -6.399091        | 0.470047  | -0.557036 |
| H    | -6.914644        | 1.242624  | -0.358895 |
| C    | -5.036891        | 0.467714  | -0.308412 |
| C    | -4.36597         | 1.682948  | 0.269001  |
| C    | -2.973122        | 1.593977  | 0.476538  |
| C    | 1.048827         | -0.126691 | 3.197156  |
| H    | 1.338496         | 0.77826   | 3.184063  |
| C    | 0.775561         | -0.717547 | 4.404562  |

|   |           |           |           |
|---|-----------|-----------|-----------|
| H | 0.863179  | -0.221871 | 5.210089  |
| C | 0.377265  | -2.027341 | 4.440427  |
| H | 0.177829  | -2.444524 | 5.271126  |
| C | 0.265253  | -2.733726 | 3.268685  |
| H | -0.000877 | -3.645911 | 3.284956  |
| C | 0.546567  | -2.112579 | 2.053465  |
| C | 0.432263  | -2.756361 | 0.731164  |
| C | 0.148797  | -4.093188 | 0.550972  |
| H | -0.026003 | -4.650271 | 1.302305  |
| C | 0.116267  | -4.615066 | -0.717413 |
| H | -0.043388 | -5.540948 | -0.856114 |
| C | 0.319907  | -3.776071 | -1.780824 |
| H | 0.284505  | -4.109914 | -2.670395 |
| C | 0.583597  | -2.427822 | -1.547782 |
| H | 0.736978  | -1.853585 | -2.288561 |
| C | 3.839934  | -1.17754  | 0.523404  |
| H | 3.554734  | -1.407184 | 1.40037   |
| C | 5.086139  | -1.562268 | 0.117651  |
| H | 5.667572  | -2.009227 | 0.722221  |
| C | 5.491458  | -1.301468 | -1.165054 |
| H | 6.348757  | -1.579205 | -1.465122 |
| C | 4.629848  | -0.620655 | -2.022533 |
| H | 4.879569  | -0.458511 | -2.92437  |
| C | 3.409011  | -0.187082 | -1.548962 |
| C | 2.448125  | 0.59185   | -2.340157 |
| C | 2.724286  | 1.152914  | -3.574221 |
| H | 3.569558  | 1.010604  | -3.981609 |
| C | 1.767288  | 1.918079  | -4.213963 |
| H | 1.941627  | 2.291046  | -5.07034  |
| C | 0.564548  | 2.131774  | -3.593939 |
| H | -0.098459 | 2.670566  | -4.009594 |
| C | 0.315531  | 1.562371  | -2.364002 |
| H | -0.522946 | 1.713005  | -1.944679 |
| H | -2.390674 | 3.496103  | 1.26833   |
