# Supplementary material
Source: MDPI journal article supplement (https://www.mdpi.com/2304-6740/9/4/24)
Supplement: s1 [file s1]

Archive with 4 entries (3 files):
- inorganics-1111477-supplementary/Ru-NQ.cif
- inorganics-1111477-supplementary/checkcif.pdf
- inorganics-1111477-supplementary/inorganics-1111477 supplementary.pdf
- inorganics-1111477-supplementary/
