# Supplementary material
Source: MDPI journal article supplement (https://www.mdpi.com/2304-6740/9/4/24)
Supplement: s1 [file s1 › inorganics-1111477-supplementary/Ru-NQ.cif]

 
data_Ru-NQ
 
_audit_creation_method            'SHELXL-2016/6'
_shelx_SHELXL_version_number      '2016/6'
_chemical_name_systematic         ?
_chemical_name_common             ?
_chemical_melting_point           ?
_chemical_formula_moiety          
 '2(C36 H24 N7 O2 Ru), 2(F6 P), 2(C4 H8 O2), C H4 O'
_chemical_formula_sum
 'C40.50 H34 F6 N7 O4.50 P Ru' 
_chemical_formula_weight          936.78

loop_
 _atom_type_symbol
 _atom_type_description
 _atom_type_scat_dispersion_real
 _atom_type_scat_dispersion_imag
 _atom_type_scat_source
 'C'  'C'   0.0033   0.0016
 'International Tables Vol C Tables 4.2.6.8 and 6.1.1.4'
 'H'  'H'   0.0000   0.0000
 'International Tables Vol C Tables 4.2.6.8 and 6.1.1.4'
 'F'  'F'   0.0171   0.0103
 'International Tables Vol C Tables 4.2.6.8 and 6.1.1.4'
 'N'  'N'   0.0061   0.0033
 'International Tables Vol C Tables 4.2.6.8 and 6.1.1.4'
 'O'  'O'   0.0106   0.0060
 'International Tables Vol C Tables 4.2.6.8 and 6.1.1.4'
 'P'  'P'   0.1023   0.0942
 'International Tables Vol C Tables 4.2.6.8 and 6.1.1.4'
 'Ru'  'Ru'  -1.2594   0.8363
 'International Tables Vol C Tables 4.2.6.8 and 6.1.1.4'
 
_space_group_crystal_system       monoclinic
_space_group_IT_number            14
_space_group_name_H-M_alt         'P 21/c'
_space_group_name_Hall            '-P 2ybc'
 
_shelx_space_group_comment
;
The symmetry employed for this shelxl refinement is uniquely defined
by the following loop, which should always be used as a source of
symmetry information in preference to the above space-group names.
They are only intended as comments.
;
 
loop_
 _space_group_symop_operation_xyz
 'x, y, z'
 '-x, y+1/2, -z+1/2'
 '-x, -y, -z'
 'x, -y-1/2, z-1/2'
 
_cell_length_a                    8.431(3)
_cell_length_b                    35.524(14)
_cell_length_c                    13.404(5)
_cell_angle_alpha                 90
_cell_angle_beta                  99.315(4)
_cell_angle_gamma                 90
_cell_volume                      3962(3)
_cell_formula_units_Z             4
_cell_measurement_temperature     100(2)
_cell_measurement_reflns_used      1617
_cell_measurement_theta_min        2.29
_cell_measurement_theta_max       21.92
 
_exptl_crystal_description        'Needle'
_exptl_crystal_colour             'Red'
_exptl_crystal_density_meas       ?
_exptl_crystal_density_method     'not measured'
_exptl_crystal_density_diffrn     1.571          
_exptl_crystal_F_000              1900
_exptl_transmission_factor_min    ?
_exptl_transmission_factor_max    ?
_exptl_crystal_size_max           0.200
_exptl_crystal_size_mid           0.150
_exptl_crystal_size_min           0.100
_exptl_absorpt_coefficient_mu     0.518
_shelx_estimated_absorpt_T_min    0.903
_shelx_estimated_absorpt_T_max    0.950
_exptl_absorpt_correction_type    'empirical'
_exptl_absorpt_correction_T_min   0.6486
_exptl_absorpt_correction_T_max   0.7456
_exptl_absorpt_process_details    'SADABS'
_exptl_absorpt_special_details    ?
_diffrn_ambient_temperature       100(2)
_diffrn_radiation_wavelength      0.71073
_diffrn_radiation_type            MoK\a
_diffrn_source                    ?
_diffrn_measurement_device_type   'Bruker APEX-II CCD'
_diffrn_measurement_method        '\f and \w scans'
_diffrn_detector_area_resol_mean  ?
_diffrn_reflns_number             23148
_diffrn_reflns_av_unetI/netI      0.1510
_diffrn_reflns_av_R_equivalents   0.0999
_diffrn_reflns_limit_h_min        -10
_diffrn_reflns_limit_h_max        10
_diffrn_reflns_limit_k_min        -42
_diffrn_reflns_limit_k_max        46
_diffrn_reflns_limit_l_min        -10
_diffrn_reflns_limit_l_max        17
_diffrn_reflns_theta_min          1.643
_diffrn_reflns_theta_max          27.499
_diffrn_reflns_theta_full         25.242
_diffrn_measured_fraction_theta_max   0.993
_diffrn_measured_fraction_theta_full  0.999
_diffrn_reflns_Laue_measured_fraction_max    0.993
_diffrn_reflns_Laue_measured_fraction_full   0.999
_diffrn_reflns_point_group_measured_fraction_max   0.993
_diffrn_reflns_point_group_measured_fraction_full  0.999
_reflns_number_total              9017
_reflns_number_gt                 4890
_reflns_threshold_expression      'I > 2\s(I)'
_reflns_Friedel_coverage          0.000
_reflns_Friedel_fraction_max      .
_reflns_Friedel_fraction_full     .
 
_reflns_special_details
;
 Reflections were merged by SHELXL according to the crystal
 class for the calculation of statistics and refinement.
 
 _reflns_Friedel_fraction is defined as the number of unique
 Friedel pairs measured divided by the number that would be
 possible theoretically, ignoring centric projections and
 systematic absences.
;
 
_computing_data_collection       'Bruker APEX2'
_computing_cell_refinement       'Bruker SAINT'
_computing_data_reduction        'Bruker SAINT'
_computing_structure_solution    'SHELXS-97 (Sheldrick 2008)'
_computing_structure_refinement  'SHELXL-2014 (Sheldrick 2014)'
_computing_molecular_graphics    'Bruker SHELXTL'
_computing_publication_material  'Bruker SHELXTL'
_refine_special_details           ?
_refine_ls_structure_factor_coef  Fsqd
_refine_ls_matrix_type            full
_refine_ls_weighting_scheme       calc
_refine_ls_weighting_details
'w=1/[\s^2^(Fo^2^)+(0.1094P)^2^+2.9896P] where P=(Fo^2^+2Fc^2^)/3'
_atom_sites_solution_primary      ?
_atom_sites_solution_secondary    ?
_atom_sites_solution_hydrogens    geom
_refine_ls_hydrogen_treatment     constr
_refine_ls_extinction_method      none
_refine_ls_extinction_coef        .
_refine_ls_number_reflns          9017
_refine_ls_number_parameters      553
_refine_ls_number_restraints      11
_refine_ls_R_factor_all           0.1512
_refine_ls_R_factor_gt            0.0773
_refine_ls_wR_factor_ref          0.2437
_refine_ls_wR_factor_gt           0.1962
_refine_ls_goodness_of_fit_ref    1.032
_refine_ls_restrained_S_all       1.032
_refine_ls_shift/su_max           0.000
_refine_ls_shift/su_mean          0.000
 
loop_
 _atom_site_label
 _atom_site_type_symbol
 _atom_site_fract_x
 _atom_site_fract_y
 _atom_site_fract_z
 _atom_site_U_iso_or_equiv
 _atom_site_adp_type
 _atom_site_occupancy
 _atom_site_site_symmetry_order  
 _atom_site_calc_flag
 _atom_site_refinement_flags_posn
 _atom_site_refinement_flags_adp
 _atom_site_refinement_flags_occupancy
 _atom_site_disorder_assembly
 _atom_site_disorder_group
Ru1 Ru 0.39159(7) 0.34535(2) 0.52785(4) 0.02693(19) Uani 1 1 d . . . . .
N1 N 0.5711(7) 0.34791(17) 0.4385(4) 0.0281(13) Uani 1 1 d . . . . .
N2 N 0.3308(7) 0.39469(18) 0.4474(4) 0.0308(14) Uani 1 1 d . . . . .
N3 N 0.3922(7) 0.43330(17) 0.3227(4) 0.0326(14) Uani 1 1 d . . . . .
N4 N 0.5100(7) 0.37764(18) 0.6423(4) 0.0313(14) Uani 1 1 d . . . . .
N5 N 0.2262(7) 0.34712(17) 0.6239(4) 0.0278(13) Uani 1 1 d . . . . .
N6 N 0.4475(7) 0.29314(17) 0.5885(4) 0.0287(13) Uani 1 1 d . . . . .
N7 N 0.2708(6) 0.31127(17) 0.4176(4) 0.0264(13) Uani 1 1 d . . . . .
O1 O 0.0246(7) 0.40635(17) 0.5383(4) 0.0500(15) Uani 1 1 d . . . . .
O2 O 0.1804(8) 0.49462(18) 0.2361(5) 0.0608(18) Uani 1 1 d . . . . .
C1 C 0.6843(9) 0.3217(2) 0.4338(5) 0.0331(17) Uani 1 1 d . . . . .
H1 H 0.688252 0.300396 0.476861 0.040 Uiso 1 1 calc R U . . .
C2 C 0.7951(9) 0.3245(2) 0.3690(5) 0.0381(19) Uani 1 1 d . . . . .
H2 H 0.871383 0.304999 0.366133 0.046 Uiso 1 1 calc R U . . .
C3 C 0.7937(10) 0.3561(3) 0.3082(5) 0.045(2) Uani 1 1 d . . . . .
H3A H 0.870635 0.358875 0.264127 0.054 Uiso 1 1 calc R U . . .
C4 C 0.6788(9) 0.3833(2) 0.3127(5) 0.0389(19) Uani 1 1 d . . . . .
H4 H 0.675833 0.405243 0.272127 0.047 Uiso 1 1 calc R U . . .
C5 C 0.5678(9) 0.3783(2) 0.3769(5) 0.0306(16) Uani 1 1 d . . . . .
C6 C 0.4347(8) 0.4039(2) 0.3819(5) 0.0293(16) Uani 1 1 d . . . . .
C7 C 0.2121(9) 0.4211(2) 0.4270(5) 0.0302(16) Uani 1 1 d . . . . .
C8 C 0.0639(9) 0.4264(2) 0.4697(5) 0.0332(17) Uani 1 1 d . . . . .
C9 C -0.0434(10) 0.4570(2) 0.4234(5) 0.0357(18) Uani 1 1 d . . . . .
C10 C -0.1879(9) 0.4633(2) 0.4602(6) 0.0381(18) Uani 1 1 d . . . . .
H10 H -0.214174 0.448093 0.513599 0.046 Uiso 1 1 calc R U . . .
C11 C -0.2911(10) 0.4910(3) 0.4201(6) 0.048(2) Uani 1 1 d . . . . .
H11 H -0.388432 0.495152 0.445646 0.058 Uiso 1 1 calc R U . . .
C12 C -0.2539(12) 0.5131(3) 0.3424(8) 0.067(3) Uani 1 1 d . . . . .
H12 H -0.326621 0.532136 0.314306 0.080 Uiso 1 1 calc R U . . .
C13 C -0.1128(12) 0.5078(3) 0.3051(8) 0.062(3) Uani 1 1 d . . . . .
H13 H -0.088512 0.523261 0.251770 0.074 Uiso 1 1 calc R U . . .
C14 C -0.0060(10) 0.4800(2) 0.3451(6) 0.043(2) Uani 1 1 d . . . . .
C15 C 0.1481(10) 0.4740(2) 0.3044(5) 0.0380(19) Uani 1 1 d . . . . .
C16 C 0.2488(9) 0.4448(2) 0.3491(5) 0.0326(17) Uani 1 1 d . . . . .
C17 C 0.6580(10) 0.3934(2) 0.6450(5) 0.0402(19) Uani 1 1 d . . . . .
H17 H 0.719789 0.386820 0.594271 0.048 Uiso 1 1 calc R U . . .
C18 C 0.7205(11) 0.4186(2) 0.7185(5) 0.042(2) Uani 1 1 d . . . . .
H18 H 0.823195 0.429493 0.717765 0.051 Uiso 1 1 calc R U . . .
C19 C 0.6339(11) 0.4279(2) 0.7930(6) 0.045(2) Uani 1 1 d . . . . .
H19 H 0.675657 0.445498 0.843979 0.054 Uiso 1 1 calc R U . . .
C20 C 0.4862(10) 0.4117(2) 0.7935(5) 0.0385(19) Uani 1 1 d . . . . .
H20 H 0.425800 0.417776 0.845329 0.046 Uiso 1 1 calc R U . . .
C21 C 0.4250(9) 0.3862(2) 0.7180(5) 0.0343(18) Uani 1 1 d . . . . .
C22 C 0.2667(9) 0.3677(2) 0.7092(5) 0.0332(17) Uani 1 1 d . . . . .
C23 C 0.1664(11) 0.3709(2) 0.7804(5) 0.042(2) Uani 1 1 d . . . . .
H23 H 0.195583 0.386615 0.837928 0.051 Uiso 1 1 calc R U . . .
C24 C 0.0241(11) 0.3514(2) 0.7677(5) 0.045(2) Uani 1 1 d . . . . .
H24 H -0.044337 0.352542 0.817362 0.055 Uiso 1 1 calc R U . . .
C25 C -0.0174(10) 0.3302(2) 0.6821(5) 0.0398(19) Uani 1 1 d . . . . .
H25 H -0.116383 0.316827 0.670888 0.048 Uiso 1 1 calc R U . . .
C26 C 0.0870(9) 0.3283(2) 0.6116(5) 0.0352(18) Uani 1 1 d . . . . .
H26 H 0.058297 0.313259 0.552872 0.042 Uiso 1 1 calc R U . . .
C27 C 0.5379(8) 0.2857(2) 0.6804(5) 0.0310(17) Uani 1 1 d . . . . .
H27 H 0.587831 0.306107 0.719264 0.037 Uiso 1 1 calc R U . . .
C28 C 0.5595(9) 0.2501(2) 0.7187(5) 0.0361(18) Uani 1 1 d . . . . .
H28 H 0.627851 0.245926 0.781386 0.043 Uiso 1 1 calc R U . . .
C29 C 0.4820(9) 0.2205(2) 0.6663(6) 0.0395(19) Uani 1 1 d . . . . .
H29 H 0.494327 0.195673 0.692731 0.047 Uiso 1 1 calc R U . . .
C30 C 0.3851(9) 0.2273(2) 0.5736(5) 0.0345(17) Uani 1 1 d . . . . .
H30 H 0.327368 0.207298 0.537287 0.041 Uiso 1 1 calc R U . . .
C31 C 0.3736(8) 0.2634(2) 0.5352(5) 0.0286(16) Uani 1 1 d . . . . .
C32 C 0.2814(8) 0.2736(2) 0.4364(5) 0.0304(17) Uani 1 1 d . . . . .
C33 C 0.2152(9) 0.2479(2) 0.3639(5) 0.0366(18) Uani 1 1 d . . . . .
H33 H 0.223842 0.221716 0.377756 0.044 Uiso 1 1 calc R U . . .
C34 C 0.1362(8) 0.2604(2) 0.2714(5) 0.0344(18) Uani 1 1 d . . . . .
H34 H 0.088375 0.242959 0.221721 0.041 Uiso 1 1 calc R U . . .
C35 C 0.1281(9) 0.2983(2) 0.2524(5) 0.0349(18) Uani 1 1 d . . . . .
H35 H 0.076289 0.307397 0.188750 0.042 Uiso 1 1 calc R U . . .
C36 C 0.1952(8) 0.3233(2) 0.3259(5) 0.0310(17) Uani 1 1 d . . . . .
H36 H 0.188472 0.349520 0.312095 0.037 Uiso 1 1 calc R U . . .
P1 P 0.8340(2) 0.20690(7) 0.47707(13) 0.0412(6) Uani 1 1 d . . . . .
F1 F 0.9169(6) 0.24345(15) 0.5333(3) 0.0603(14) Uani 1 1 d . . . . .
F2 F 0.6651(6) 0.22831(16) 0.4600(3) 0.0604(15) Uani 1 1 d . . . . .
F3 F 0.8697(5) 0.22258(16) 0.3713(3) 0.0599(15) Uani 1 1 d . . . . .
F4 F 0.7514(6) 0.17096(17) 0.4197(4) 0.0642(15) Uani 1 1 d . . . . .
F5 F 1.0051(5) 0.18617(13) 0.4931(3) 0.0436(12) Uani 1 1 d . . . . .
F6 F 0.7987(5) 0.19055(14) 0.5819(3) 0.0477(12) Uani 1 1 d . . . . .
O3 O 1.2000(10) 0.1062(3) 0.5371(5) 0.090(3) Uani 1 1 d . . . . .
O4 O 1.0577(10) 0.1092(2) 0.6659(6) 0.087(2) Uani 1 1 d . . . . .
C37 C 1.3342(14) 0.1236(4) 0.6007(8) 0.082(4) Uani 1 1 d . . . . .
H37 H 1.368335 0.108376 0.662254 0.098 Uiso 1 1 calc R U . . .
H37A H 1.305127 0.149148 0.621186 0.098 Uiso 1 1 calc R U . . .
C38 C 1.4654(16) 0.1256(5) 0.5381(9) 0.117(6) Uani 1 1 d . . . . .
H38 H 1.505072 0.100166 0.528127 0.175 Uiso 1 1 calc R U . . .
H38A H 1.553633 0.141081 0.572920 0.175 Uiso 1 1 calc R U . . .
H38B H 1.423711 0.136846 0.472368 0.175 Uiso 1 1 calc R U . . .
C39 C 1.0625(15) 0.1004(4) 0.5816(8) 0.088(4) Uani 1 1 d . . . . .
C40 C 0.9291(16) 0.0797(7) 0.5145(10) 0.212(13) Uani 1 1 d . . . . .
H40 H 0.883882 0.060488 0.554192 0.318 Uiso 1 1 calc R U . . .
H40A H 0.972237 0.067633 0.458839 0.318 Uiso 1 1 calc R U . . .
H40B H 0.844667 0.097574 0.486939 0.318 Uiso 1 1 calc R U . . .
C41 C 0.506(3) 0.5197(11) 0.9966(15) 0.174(12) Uani 0.5 1 d D U P . .
H46 H 0.488533 0.541511 1.038026 0.261 Uiso 0.5 1 calc R U P . .
H47 H 0.610971 0.508410 1.022512 0.261 Uiso 0.5 1 calc DR U P . .
H48 H 0.421308 0.501055 0.999285 0.261 Uiso 0.5 1 calc R U P . .
O5 O 0.503(2) 0.5314(8) 0.8941(12) 0.179(11) Uani 0.5 1 d D U P . .
H45 H 0.484730 0.512725 0.855553 0.268 Uiso 0.5 1 calc DR U P . .
 
loop_
 _atom_site_aniso_label
 _atom_site_aniso_U_11
 _atom_site_aniso_U_22
 _atom_site_aniso_U_33
 _atom_site_aniso_U_23
 _atom_site_aniso_U_13
 _atom_site_aniso_U_12
Ru1 0.0245(3) 0.0378(4) 0.0188(3) -0.0021(2) 0.00447(19) 0.0019(3)
N1 0.026(3) 0.038(4) 0.020(2) -0.009(2) 0.005(2) -0.002(3)
N2 0.023(3) 0.045(4) 0.024(3) -0.001(2) 0.002(2) -0.002(3)
N3 0.032(4) 0.036(4) 0.029(3) -0.002(3) 0.003(2) -0.008(3)
N4 0.029(4) 0.044(4) 0.020(3) -0.003(2) 0.002(2) 0.002(3)
N5 0.025(3) 0.039(4) 0.021(2) 0.003(2) 0.007(2) 0.008(3)
N6 0.019(3) 0.047(4) 0.020(3) -0.001(2) 0.004(2) -0.002(3)
N7 0.018(3) 0.039(4) 0.023(3) -0.001(2) 0.006(2) -0.001(3)
O1 0.057(4) 0.055(4) 0.045(3) 0.015(3) 0.028(3) 0.014(3)
O2 0.062(5) 0.056(4) 0.068(4) 0.026(3) 0.019(3) -0.001(3)
C1 0.029(4) 0.045(5) 0.026(3) -0.003(3) 0.006(3) 0.008(4)
C2 0.029(4) 0.055(6) 0.031(4) -0.010(3) 0.007(3) 0.001(4)
C3 0.031(5) 0.076(7) 0.031(4) -0.012(4) 0.012(3) -0.008(4)
C4 0.033(5) 0.057(6) 0.026(3) -0.002(3) 0.003(3) -0.007(4)
C5 0.030(4) 0.038(5) 0.022(3) -0.008(3) 0.000(3) -0.002(3)
C6 0.025(4) 0.039(5) 0.022(3) -0.003(3) -0.002(3) -0.002(3)
C7 0.035(4) 0.029(4) 0.024(3) -0.004(3) 0.001(3) -0.002(3)
C8 0.029(4) 0.041(5) 0.030(4) -0.002(3) 0.008(3) 0.002(3)
C9 0.041(5) 0.032(5) 0.033(4) -0.005(3) 0.002(3) -0.004(4)
C10 0.031(5) 0.037(5) 0.045(4) 0.003(3) 0.003(3) -0.002(4)
C11 0.035(5) 0.047(6) 0.063(5) -0.003(4) 0.008(4) 0.004(4)
C12 0.040(6) 0.060(7) 0.099(8) 0.023(6) 0.007(5) 0.017(5)
C13 0.044(6) 0.059(7) 0.082(7) 0.025(5) 0.007(5) 0.012(5)
C14 0.044(5) 0.034(5) 0.051(5) -0.003(4) 0.009(4) -0.003(4)
C15 0.042(5) 0.032(5) 0.040(4) 0.011(3) 0.006(3) -0.002(4)
C16 0.025(4) 0.043(5) 0.030(3) 0.001(3) 0.004(3) -0.003(3)
C17 0.045(5) 0.047(5) 0.027(4) -0.003(3) 0.003(3) 0.004(4)
C18 0.047(5) 0.038(5) 0.038(4) -0.002(3) -0.006(4) 0.001(4)
C19 0.051(6) 0.039(5) 0.039(4) -0.008(3) -0.009(4) 0.008(4)
C20 0.057(6) 0.038(5) 0.020(3) -0.006(3) 0.004(3) 0.015(4)
C21 0.040(5) 0.041(5) 0.022(3) 0.003(3) 0.005(3) 0.012(4)
C22 0.045(5) 0.034(5) 0.022(3) 0.003(3) 0.009(3) 0.009(4)
C23 0.055(6) 0.051(6) 0.024(3) -0.001(3) 0.015(3) 0.009(4)
C24 0.053(6) 0.057(6) 0.031(4) 0.008(3) 0.021(4) 0.020(4)
C25 0.034(5) 0.053(5) 0.037(4) 0.013(4) 0.016(3) 0.006(4)
C26 0.029(4) 0.046(5) 0.032(4) 0.007(3) 0.005(3) 0.005(4)
C27 0.020(4) 0.044(5) 0.029(3) -0.003(3) 0.005(3) 0.000(3)
C28 0.022(4) 0.057(6) 0.030(4) 0.007(3) 0.006(3) 0.000(4)
C29 0.033(5) 0.044(5) 0.043(4) 0.009(4) 0.011(3) 0.001(4)
C30 0.035(5) 0.037(5) 0.031(4) 0.003(3) 0.004(3) -0.006(4)
C31 0.021(4) 0.041(5) 0.025(3) 0.003(3) 0.008(3) 0.000(3)
C32 0.025(4) 0.046(5) 0.023(3) -0.001(3) 0.010(3) -0.003(3)
C33 0.037(5) 0.039(5) 0.035(4) -0.003(3) 0.008(3) -0.003(4)
C34 0.021(4) 0.058(6) 0.023(3) -0.006(3) 0.001(3) -0.007(4)
C35 0.029(4) 0.059(6) 0.016(3) -0.001(3) 0.001(3) 0.004(4)
C36 0.020(4) 0.051(5) 0.023(3) -0.003(3) 0.006(3) 0.003(3)
P1 0.0279(11) 0.0724(17) 0.0245(9) 0.0056(9) 0.0083(8) 0.0030(11)
F1 0.062(4) 0.065(4) 0.054(3) 0.000(2) 0.010(3) -0.005(3)
F2 0.038(3) 0.101(4) 0.046(3) 0.021(3) 0.020(2) 0.022(3)
F3 0.031(3) 0.118(5) 0.032(2) 0.020(2) 0.0100(19) 0.010(3)
F4 0.045(3) 0.096(4) 0.051(3) -0.019(3) 0.007(2) -0.016(3)
F5 0.032(3) 0.067(3) 0.032(2) 0.006(2) 0.0066(18) 0.005(2)
F6 0.044(3) 0.072(4) 0.029(2) 0.010(2) 0.0144(19) 0.002(2)
O3 0.078(6) 0.135(8) 0.055(4) -0.005(4) 0.009(4) -0.032(5)
O4 0.088(6) 0.109(7) 0.072(5) 0.010(4) 0.034(4) 0.016(5)
C37 0.073(8) 0.101(10) 0.068(7) -0.005(6) -0.002(6) -0.034(7)
C38 0.071(9) 0.216(18) 0.066(8) -0.047(9) 0.018(6) 0.007(10)
C39 0.073(9) 0.139(12) 0.055(6) 0.004(7) 0.019(6) -0.019(8)
C40 0.058(10) 0.51(4) 0.064(8) -0.026(14) -0.013(7) -0.085(16)
C41 0.049(11) 0.38(3) 0.098(12) 0.110(17) 0.036(9) 0.001(16)
O5 0.063(10) 0.39(3) 0.093(11) 0.098(16) 0.032(8) 0.006(15)
 
_geom_special_details
;
 All esds (except the esd in the dihedral angle between two l.s. planes)
 are estimated using the full covariance matrix.  The cell esds are taken
 into account individually in the estimation of esds in distances, angles
 and torsion angles; correlations between esds in cell parameters are only
 used when they are defined by crystal symmetry.  An approximate (isotropic)
 treatment of cell esds is used for estimating esds involving l.s. planes.
;
 
loop_
 _geom_bond_atom_site_label_1
 _geom_bond_atom_site_label_2
 _geom_bond_distance
 _geom_bond_site_symmetry_2
 _geom_bond_publ_flag
Ru1 N4 2.042(6) . ?
Ru1 N5 2.046(5) . ?
Ru1 N6 2.049(6) . ?
Ru1 N7 2.050(5) . ?
Ru1 N2 2.078(6) . ?
Ru1 N1 2.079(5) . ?
N1 C1 1.341(9) . ?
N1 C5 1.356(9) . ?
N2 C7 1.367(9) . ?
N2 C6 1.378(8) . ?
N3 C6 1.325(9) . ?
N3 C16 1.375(9) . ?
N4 C17 1.364(10) . ?
N4 C21 1.368(8) . ?
N5 C26 1.337(9) . ?
N5 C22 1.353(9) . ?
N6 C27 1.366(8) . ?
N6 C31 1.369(9) . ?
N7 C36 1.359(8) . ?
N7 C32 1.363(9) . ?
O1 C8 1.249(8) . ?
O2 C15 1.237(8) . ?
C1 C2 1.377(9) . ?
C1 H1 0.9500 . ?
C2 C3 1.386(11) . ?
C2 H2 0.9500 . ?
C3 C4 1.377(11) . ?
C3 H3A 0.9500 . ?
C4 C5 1.381(10) . ?
C4 H4 0.9500 . ?
C5 C6 1.455(10) . ?
C7 C16 1.414(9) . ?
C7 C8 1.469(9) . ?
C8 C9 1.483(11) . ?
C9 C10 1.405(10) . ?
C9 C14 1.405(10) . ?
C10 C11 1.367(11) . ?
C10 H10 0.9500 . ?
C11 C12 1.378(12) . ?
C11 H11 0.9500 . ?
C12 C13 1.376(13) . ?
C12 H12 0.9500 . ?
C13 C14 1.385(12) . ?
C13 H13 0.9500 . ?
C14 C15 1.503(11) . ?
C15 C16 1.412(10) . ?
C17 C18 1.371(10) . ?
C17 H17 0.9500 . ?
C18 C19 1.370(11) . ?
C18 H18 0.9500 . ?
C19 C20 1.374(12) . ?
C19 H19 0.9500 . ?
C20 C21 1.393(10) . ?
C20 H20 0.9500 . ?
C21 C22 1.474(11) . ?
C22 C23 1.379(9) . ?
C23 C24 1.373(12) . ?
C23 H23 0.9500 . ?
C24 C25 1.371(11) . ?
C24 H24 0.9500 . ?
C25 C26 1.393(9) . ?
C25 H25 0.9500 . ?
C26 H26 0.9500 . ?
C27 C28 1.365(10) . ?
C27 H27 0.9500 . ?
C28 C29 1.371(11) . ?
C28 H28 0.9500 . ?
C29 C30 1.393(10) . ?
C29 H29 0.9500 . ?
C30 C31 1.378(10) . ?
C30 H30 0.9500 . ?
C31 C32 1.468(9) . ?
C32 C33 1.382(10) . ?
C33 C34 1.382(10) . ?
C33 H33 0.9500 . ?
C34 C35 1.372(10) . ?
C34 H34 0.9500 . ?
C35 C36 1.376(10) . ?
C35 H35 0.9500 . ?
C36 H36 0.9500 . ?
P1 F4 1.592(6) . ?
P1 F6 1.593(4) . ?
P1 F3 1.596(4) . ?
P1 F2 1.598(5) . ?
P1 F5 1.603(5) . ?
P1 F1 1.604(6) . ?
O3 C39 1.401(13) . ?
O3 C37 1.442(12) . ?
O4 C39 1.179(12) . ?
C37 C38 1.494(15) . ?
C37 H37 0.9900 . ?
C37 H37A 0.9900 . ?
C38 H38 0.9800 . ?
C38 H38A 0.9800 . ?
C38 H38B 0.9800 . ?
C39 C40 1.513(18) . ?
C40 H40 0.9800 . ?
C40 H40A 0.9800 . ?
C40 H40B 0.9800 . ?
C41 O5 1.431(2) . ?
C41 H46 0.9800 . ?
C41 H47 0.9800 . ?
C41 H48 0.9800 . ?
C41 H48 0.95(7) 3_667 ?
O5 H45 0.8400 . ?
 
loop_
 _geom_angle_atom_site_label_1
 _geom_angle_atom_site_label_2
 _geom_angle_atom_site_label_3
 _geom_angle
 _geom_angle_site_symmetry_1
 _geom_angle_site_symmetry_3
 _geom_angle_publ_flag
N4 Ru1 N5 79.1(2) . . ?
N4 Ru1 N6 99.1(2) . . ?
N5 Ru1 N6 85.1(2) . . ?
N4 Ru1 N7 177.5(2) . . ?
N5 Ru1 N7 99.3(2) . . ?
N6 Ru1 N7 78.9(2) . . ?
N4 Ru1 N2 88.0(2) . . ?
N5 Ru1 N2 99.4(2) . . ?
N6 Ru1 N2 172.2(2) . . ?
N7 Ru1 N2 94.1(2) . . ?
N4 Ru1 N1 95.5(2) . . ?
N5 Ru1 N1 174.3(2) . . ?
N6 Ru1 N1 97.2(2) . . ?
N7 Ru1 N1 86.2(2) . . ?
N2 Ru1 N1 78.8(2) . . ?
C1 N1 C5 117.9(6) . . ?
C1 N1 Ru1 125.9(5) . . ?
C5 N1 Ru1 116.1(5) . . ?
C7 N2 C6 103.3(6) . . ?
C7 N2 Ru1 142.6(5) . . ?
C6 N2 Ru1 113.7(5) . . ?
C6 N3 C16 104.2(6) . . ?
C17 N4 C21 118.5(6) . . ?
C17 N4 Ru1 125.8(4) . . ?
C21 N4 Ru1 115.5(5) . . ?
C26 N5 C22 118.0(6) . . ?
C26 N5 Ru1 125.5(5) . . ?
C22 N5 Ru1 116.3(5) . . ?
C27 N6 C31 117.5(6) . . ?
C27 N6 Ru1 126.3(5) . . ?
C31 N6 Ru1 115.9(4) . . ?
C36 N7 C32 118.9(6) . . ?
C36 N7 Ru1 124.9(5) . . ?
C32 N7 Ru1 115.9(4) . . ?
N1 C1 C2 122.7(7) . . ?
N1 C1 H1 118.6 . . ?
C2 C1 H1 118.6 . . ?
C1 C2 C3 119.1(7) . . ?
C1 C2 H2 120.4 . . ?
C3 C2 H2 120.4 . . ?
C4 C3 C2 118.7(7) . . ?
C4 C3 H3A 120.6 . . ?
C2 C3 H3A 120.6 . . ?
C3 C4 C5 119.4(7) . . ?
C3 C4 H4 120.3 . . ?
C5 C4 H4 120.3 . . ?
N1 C5 C4 122.1(7) . . ?
N1 C5 C6 114.2(6) . . ?
C4 C5 C6 123.6(7) . . ?
N3 C6 N2 115.5(6) . . ?
N3 C6 C5 127.0(6) . . ?
N2 C6 C5 117.1(6) . . ?
N2 C7 C16 108.4(6) . . ?
N2 C7 C8 130.6(6) . . ?
C16 C7 C8 120.9(7) . . ?
O1 C8 C7 123.9(7) . . ?
O1 C8 C9 120.6(7) . . ?
C7 C8 C9 115.5(6) . . ?
C10 C9 C14 118.8(7) . . ?
C10 C9 C8 118.3(7) . . ?
C14 C9 C8 122.9(7) . . ?
C11 C10 C9 120.6(8) . . ?
C11 C10 H10 119.7 . . ?
C9 C10 H10 119.7 . . ?
C10 C11 C12 119.9(8) . . ?
C10 C11 H11 120.0 . . ?
C12 C11 H11 120.0 . . ?
C13 C12 C11 120.9(9) . . ?
C13 C12 H12 119.6 . . ?
C11 C12 H12 119.6 . . ?
C12 C13 C14 120.2(9) . . ?
C12 C13 H13 119.9 . . ?
C14 C13 H13 119.9 . . ?
C13 C14 C9 119.6(8) . . ?
C13 C14 C15 120.4(8) . . ?
C9 C14 C15 120.1(7) . . ?
O2 C15 C16 124.0(8) . . ?
O2 C15 C14 119.5(7) . . ?
C16 C15 C14 116.4(6) . . ?
N3 C16 C15 127.1(6) . . ?
N3 C16 C7 108.6(7) . . ?
C15 C16 C7 124.2(7) . . ?
N4 C17 C18 122.0(7) . . ?
N4 C17 H17 119.0 . . ?
C18 C17 H17 119.0 . . ?
C19 C18 C17 119.6(8) . . ?
C19 C18 H18 120.2 . . ?
C17 C18 H18 120.2 . . ?
C18 C19 C20 119.5(7) . . ?
C18 C19 H19 120.3 . . ?
C20 C19 H19 120.3 . . ?
C19 C20 C21 119.9(7) . . ?
C19 C20 H20 120.0 . . ?
C21 C20 H20 120.0 . . ?
N4 C21 C20 120.4(7) . . ?
N4 C21 C22 114.7(6) . . ?
C20 C21 C22 124.9(6) . . ?
N5 C22 C23 122.1(7) . . ?
N5 C22 C21 114.2(6) . . ?
C23 C22 C21 123.7(7) . . ?
C24 C23 C22 119.5(7) . . ?
C24 C23 H23 120.2 . . ?
C22 C23 H23 120.2 . . ?
C25 C24 C23 118.8(7) . . ?
C25 C24 H24 120.6 . . ?
C23 C24 H24 120.6 . . ?
C24 C25 C26 119.3(8) . . ?
C24 C25 H25 120.3 . . ?
C26 C25 H25 120.3 . . ?
N5 C26 C25 122.1(7) . . ?
N5 C26 H26 118.9 . . ?
C25 C26 H26 118.9 . . ?
C28 C27 N6 122.7(7) . . ?
C28 C27 H27 118.7 . . ?
N6 C27 H27 118.7 . . ?
C27 C28 C29 119.6(7) . . ?
C27 C28 H28 120.2 . . ?
C29 C28 H28 120.2 . . ?
C28 C29 C30 119.1(7) . . ?
C28 C29 H29 120.5 . . ?
C30 C29 H29 120.5 . . ?
C31 C30 C29 119.3(7) . . ?
C31 C30 H30 120.3 . . ?
C29 C30 H30 120.3 . . ?
N6 C31 C30 121.7(6) . . ?
N6 C31 C32 114.2(6) . . ?
C30 C31 C32 124.2(7) . . ?
N7 C32 C33 120.7(6) . . ?
N7 C32 C31 114.8(6) . . ?
C33 C32 C31 124.4(7) . . ?
C32 C33 C34 120.1(8) . . ?
C32 C33 H33 120.0 . . ?
C34 C33 H33 120.0 . . ?
C35 C34 C33 118.9(7) . . ?
C35 C34 H34 120.6 . . ?
C33 C34 H34 120.6 . . ?
C34 C35 C36 119.9(6) . . ?
C34 C35 H35 120.1 . . ?
C36 C35 H35 120.1 . . ?
N7 C36 C35 121.5(7) . . ?
N7 C36 H36 119.2 . . ?
C35 C36 H36 119.2 . . ?
F4 P1 F6 90.3(3) . . ?
F4 P1 F3 88.9(3) . . ?
F6 P1 F3 179.0(3) . . ?
F4 P1 F2 90.1(3) . . ?
F6 P1 F2 90.6(2) . . ?
F3 P1 F2 89.9(3) . . ?
F4 P1 F5 90.6(3) . . ?
F6 P1 F5 90.4(2) . . ?
F3 P1 F5 89.1(2) . . ?
F2 P1 F5 178.8(3) . . ?
F4 P1 F1 179.1(3) . . ?
F6 P1 F1 90.6(3) . . ?
F3 P1 F1 90.2(3) . . ?
F2 P1 F1 89.6(3) . . ?
F5 P1 F1 89.7(3) . . ?
C39 O3 C37 115.8(9) . . ?
O3 C37 C38 105.7(9) . . ?
O3 C37 H37 110.6 . . ?
C38 C37 H37 110.6 . . ?
O3 C37 H37A 110.6 . . ?
C38 C37 H37A 110.6 . . ?
H37 C37 H37A 108.7 . . ?
C37 C38 H38 109.5 . . ?
C37 C38 H38A 109.5 . . ?
H38 C38 H38A 109.5 . . ?
C37 C38 H38B 109.5 . . ?
H38 C38 H38B 109.5 . . ?
H38A C38 H38B 109.5 . . ?
O4 C39 O3 121.9(11) . . ?
O4 C39 C40 124.0(12) . . ?
O3 C39 C40 113.9(10) . . ?
C39 C40 H40 109.5 . . ?
C39 C40 H40A 109.5 . . ?
H40 C40 H40A 109.5 . . ?
C39 C40 H40B 109.5 . . ?
H40 C40 H40B 109.5 . . ?
H40A C40 H40B 109.5 . . ?
O5 C41 H46 109.5 . . ?
O5 C41 H47 109.5 . . ?
H46 C41 H47 109.5 . . ?
O5 C41 H48 109.5 . . ?
H46 C41 H48 109.5 . . ?
H47 C41 H48 109.5 . . ?
O5 C41 H48 101(3) . 3_667 ?
H46 C41 H48 137.3 . 3_667 ?
H47 C41 H48 29.8 . 3_667 ?
H48 C41 H48 86.7 . 3_667 ?
C41 O5 H45 109.5 . . ?
 
loop_
 _geom_torsion_atom_site_label_1
 _geom_torsion_atom_site_label_2
 _geom_torsion_atom_site_label_3
 _geom_torsion_atom_site_label_4
 _geom_torsion
 _geom_torsion_site_symmetry_1
 _geom_torsion_site_symmetry_2
 _geom_torsion_site_symmetry_3
 _geom_torsion_site_symmetry_4
 _geom_torsion_publ_flag
C5 N1 C1 C2 -0.4(10) . . . . ?
Ru1 N1 C1 C2 176.8(5) . . . . ?
N1 C1 C2 C3 2.1(11) . . . . ?
C1 C2 C3 C4 -1.6(11) . . . . ?
C2 C3 C4 C5 -0.5(11) . . . . ?
C1 N1 C5 C4 -1.8(10) . . . . ?
Ru1 N1 C5 C4 -179.2(5) . . . . ?
C1 N1 C5 C6 175.9(6) . . . . ?
Ru1 N1 C5 C6 -1.5(7) . . . . ?
C3 C4 C5 N1 2.2(11) . . . . ?
C3 C4 C5 C6 -175.3(7) . . . . ?
C16 N3 C6 N2 -0.4(8) . . . . ?
C16 N3 C6 C5 172.2(7) . . . . ?
C7 N2 C6 N3 -0.2(8) . . . . ?
Ru1 N2 C6 N3 174.2(5) . . . . ?
C7 N2 C6 C5 -173.6(6) . . . . ?
Ru1 N2 C6 C5 0.8(7) . . . . ?
N1 C5 C6 N3 -172.1(6) . . . . ?
C4 C5 C6 N3 5.6(11) . . . . ?
N1 C5 C6 N2 0.4(9) . . . . ?
C4 C5 C6 N2 178.1(6) . . . . ?
C6 N2 C7 C16 0.7(7) . . . . ?
Ru1 N2 C7 C16 -170.8(6) . . . . ?
C6 N2 C7 C8 178.6(7) . . . . ?
Ru1 N2 C7 C8 7.1(13) . . . . ?
N2 C7 C8 O1 2.0(12) . . . . ?
C16 C7 C8 O1 179.7(7) . . . . ?
N2 C7 C8 C9 -175.8(7) . . . . ?
C16 C7 C8 C9 1.9(10) . . . . ?
O1 C8 C9 C10 1.5(11) . . . . ?
C7 C8 C9 C10 179.4(6) . . . . ?
O1 C8 C9 C14 -179.0(8) . . . . ?
C7 C8 C9 C14 -1.1(11) . . . . ?
C14 C9 C10 C11 0.6(12) . . . . ?
C8 C9 C10 C11 -179.9(7) . . . . ?
C9 C10 C11 C12 0.2(13) . . . . ?
C10 C11 C12 C13 -0.7(16) . . . . ?
C11 C12 C13 C14 0.3(16) . . . . ?
C12 C13 C14 C9 0.5(14) . . . . ?
C12 C13 C14 C15 179.9(9) . . . . ?
C10 C9 C14 C13 -1.0(12) . . . . ?
C8 C9 C14 C13 179.5(8) . . . . ?
C10 C9 C14 C15 179.7(7) . . . . ?
C8 C9 C14 C15 0.2(12) . . . . ?
C13 C14 C15 O2 1.3(13) . . . . ?
C9 C14 C15 O2 -179.4(8) . . . . ?
C13 C14 C15 C16 -179.4(8) . . . . ?
C9 C14 C15 C16 -0.1(11) . . . . ?
C6 N3 C16 C15 -176.3(7) . . . . ?
C6 N3 C16 C7 0.9(8) . . . . ?
O2 C15 C16 N3 -3.0(13) . . . . ?
C14 C15 C16 N3 177.7(7) . . . . ?
O2 C15 C16 C7 -179.7(8) . . . . ?
C14 C15 C16 C7 1.0(11) . . . . ?
N2 C7 C16 N3 -1.0(8) . . . . ?
C8 C7 C16 N3 -179.2(6) . . . . ?
N2 C7 C16 C15 176.2(7) . . . . ?
C8 C7 C16 C15 -1.9(11) . . . . ?
C21 N4 C17 C18 -2.7(11) . . . . ?
Ru1 N4 C17 C18 171.6(6) . . . . ?
N4 C17 C18 C19 1.1(12) . . . . ?
C17 C18 C19 C20 0.6(12) . . . . ?
C18 C19 C20 C21 -0.6(12) . . . . ?
C17 N4 C21 C20 2.7(10) . . . . ?
Ru1 N4 C21 C20 -172.3(5) . . . . ?
C17 N4 C21 C22 -179.8(6) . . . . ?
Ru1 N4 C21 C22 5.3(8) . . . . ?
C19 C20 C21 N4 -1.1(11) . . . . ?
C19 C20 C21 C22 -178.4(7) . . . . ?
C26 N5 C22 C23 -2.7(10) . . . . ?
Ru1 N5 C22 C23 -179.5(6) . . . . ?
C26 N5 C22 C21 177.7(6) . . . . ?
Ru1 N5 C22 C21 0.9(8) . . . . ?
N4 C21 C22 N5 -4.1(9) . . . . ?
C20 C21 C22 N5 173.4(7) . . . . ?
N4 C21 C22 C23 176.4(7) . . . . ?
C20 C21 C22 C23 -6.2(12) . . . . ?
N5 C22 C23 C24 3.2(11) . . . . ?
C21 C22 C23 C24 -177.2(7) . . . . ?
C22 C23 C24 C25 -2.5(12) . . . . ?
C23 C24 C25 C26 1.4(12) . . . . ?
C22 N5 C26 C25 1.6(10) . . . . ?
Ru1 N5 C26 C25 178.1(5) . . . . ?
C24 C25 C26 N5 -1.0(11) . . . . ?
C31 N6 C27 C28 1.6(9) . . . . ?
Ru1 N6 C27 C28 174.8(5) . . . . ?
N6 C27 C28 C29 -3.3(10) . . . . ?
C27 C28 C29 C30 1.3(11) . . . . ?
C28 C29 C30 C31 2.3(11) . . . . ?
C27 N6 C31 C30 2.1(9) . . . . ?
Ru1 N6 C31 C30 -171.9(5) . . . . ?
C27 N6 C31 C32 -178.9(5) . . . . ?
Ru1 N6 C31 C32 7.2(7) . . . . ?
C29 C30 C31 N6 -4.0(10) . . . . ?
C29 C30 C31 C32 177.0(6) . . . . ?
C36 N7 C32 C33 -0.6(9) . . . . ?
Ru1 N7 C32 C33 -174.9(5) . . . . ?
C36 N7 C32 C31 176.5(5) . . . . ?
Ru1 N7 C32 C31 2.2(7) . . . . ?
N6 C31 C32 N7 -6.1(8) . . . . ?
C30 C31 C32 N7 172.9(6) . . . . ?
N6 C31 C32 C33 170.9(6) . . . . ?
C30 C31 C32 C33 -10.1(11) . . . . ?
N7 C32 C33 C34 -0.4(10) . . . . ?
C31 C32 C33 C34 -177.2(6) . . . . ?
C32 C33 C34 C35 1.3(11) . . . . ?
C33 C34 C35 C36 -1.3(10) . . . . ?
C32 N7 C36 C35 0.7(9) . . . . ?
Ru1 N7 C36 C35 174.4(5) . . . . ?
C34 C35 C36 N7 0.3(10) . . . . ?
C39 O3 C37 C38 178.4(11) . . . . ?
C37 O3 C39 O4 -0.5(18) . . . . ?
C37 O3 C39 C40 -176.1(14) . . . . ?
 
_refine_diff_density_max    1.491
_refine_diff_density_min   -0.793
_refine_diff_density_rms    0.144

_shelx_res_file
;
TITL mt17Ru_a.res in P2(1)/c
    mt17Ru_a.res
    created by SHELXL-2016/6 at 18:55:37 on 15-Feb-2021
REM  Yadorkari-X generated
CELL 0.71073 8.4311 35.5242 13.4037 90.0000 99.3150 90.0000
ZERR 4.0 0.0032 0.0135 0.0051 0.0000 0.0040 0.0000
LATT 1
SYMM -X, 1/2+Y, 1/2-Z
REM  SPGR P21/c monoclinic
SFAC C H F N O P Ru
UNIT 162 136 24 28 18 4 4
SIZE 0.20 0.15 0.10
TEMP -173.0
L.S. 20
FMAP 2
PLAN -3
ACTA
CONF
LIST 4
BOND $H
MERG 2
OMIT -10.000000 55.000000
EQIV $1 1-X, 1-Y, 2-Z

DFIX 1.43 0.002 C41  O5
RIGU 0.002 0.002 O5  C41
SIMU 0.004 0.008 1.7 O5  C41
FREE C41 C41_$1
DANG 2.3 0.02 H47  H45

WGHT    0.109400    2.989600
FVAR       0.21895
RU1   7    0.391592    0.345346    0.527850    11.00000    0.02447    0.03780 =
         0.01883   -0.00210    0.00447    0.00192
N1    4    0.571140    0.347906    0.438492    11.00000    0.02611    0.03822 =
         0.02045   -0.00864    0.00496   -0.00186
N2    4    0.330759    0.394689    0.447448    11.00000    0.02251    0.04549 =
         0.02390   -0.00125    0.00197   -0.00214
N3    4    0.392189    0.433301    0.322726    11.00000    0.03177    0.03626 =
         0.02916   -0.00226    0.00287   -0.00792
N4    4    0.509982    0.377645    0.642291    11.00000    0.02866    0.04428 =
         0.02040   -0.00281    0.00186    0.00169
N5    4    0.226197    0.347118    0.623869    11.00000    0.02485    0.03887 =
         0.02074    0.00329    0.00663    0.00808
N6    4    0.447542    0.293142    0.588495    11.00000    0.01924    0.04709 =
         0.02005   -0.00111    0.00386   -0.00150
N7    4    0.270780    0.311273    0.417561    11.00000    0.01825    0.03916 =
         0.02259   -0.00130    0.00573   -0.00097
O1    5    0.024571    0.406347    0.538258    11.00000    0.05702    0.05506 =
         0.04465    0.01489    0.02805    0.01385
O2    5    0.180383    0.494623    0.236080    11.00000    0.06156    0.05563 =
         0.06791    0.02569    0.01893   -0.00129
C1    1    0.684324    0.321723    0.433769    11.00000    0.02856    0.04474 =
         0.02639   -0.00286    0.00583    0.00842
AFIX  43
H1    2    0.688252    0.300396    0.476861    11.00000   -1.20000
AFIX   0
C2    1    0.795077    0.324482    0.369028    11.00000    0.02916    0.05516 =
         0.03068   -0.00957    0.00664    0.00100
AFIX  43
H2    2    0.871383    0.304999    0.366133    11.00000   -1.20000
AFIX   0
C3    1    0.793738    0.356055    0.308156    11.00000    0.03053    0.07626 =
         0.03113   -0.01223    0.01221   -0.00777
AFIX  43
H3A   2    0.870635    0.358875    0.264127    11.00000   -1.20000
AFIX   0
C4    1    0.678787    0.383258    0.312736    11.00000    0.03312    0.05683 =
         0.02616   -0.00224    0.00314   -0.00692
AFIX  43
H4    2    0.675833    0.405243    0.272127    11.00000   -1.20000
AFIX   0
C5    1    0.567825    0.378273    0.376932    11.00000    0.02971    0.03849 =
         0.02205   -0.00795   -0.00020   -0.00206
C6    1    0.434718    0.403913    0.381853    11.00000    0.02486    0.03950 =
         0.02181   -0.00301   -0.00170   -0.00225
C7    1    0.212133    0.421111    0.427020    11.00000    0.03534    0.02939 =
         0.02442   -0.00390    0.00058   -0.00233
C8    1    0.063894    0.426413    0.469739    11.00000    0.02922    0.04092 =
         0.03039   -0.00186    0.00762    0.00241
C9    1   -0.043374    0.456974    0.423393    11.00000    0.04146    0.03163 =
         0.03277   -0.00469    0.00182   -0.00378
C10   1   -0.187928    0.463276    0.460247    11.00000    0.03109    0.03715 =
         0.04519    0.00344    0.00323   -0.00188
AFIX  43
H10   2   -0.214174    0.448093    0.513599    11.00000   -1.20000
AFIX   0
C11   1   -0.291149    0.491040    0.420079    11.00000    0.03471    0.04664 =
         0.06311   -0.00260    0.00809    0.00358
AFIX  43
H11   2   -0.388432    0.495152    0.445646    11.00000   -1.20000
AFIX   0
C12   1   -0.253901    0.513059    0.342437    11.00000    0.03986    0.05965 =
         0.09877    0.02302    0.00701    0.01717
AFIX  43
H12   2   -0.326621    0.532136    0.314306    11.00000   -1.20000
AFIX   0
C13   1   -0.112751    0.507782    0.305106    11.00000    0.04379    0.05915 =
         0.08185    0.02485    0.00695    0.01186
AFIX  43
H13   2   -0.088512    0.523261    0.251770    11.00000   -1.20000
AFIX   0
C14   1   -0.005980    0.479967    0.345092    11.00000    0.04411    0.03366 =
         0.05124   -0.00297    0.00877   -0.00298
C15   1    0.148097    0.474035    0.304435    11.00000    0.04239    0.03174 =
         0.03971    0.01068    0.00582   -0.00202
C16   1    0.248844    0.444820    0.349122    11.00000    0.02470    0.04283 =
         0.03012    0.00148    0.00406   -0.00265
C17   1    0.658035    0.393448    0.644953    11.00000    0.04523    0.04717 =
         0.02723   -0.00297    0.00326    0.00405
AFIX  43
H17   2    0.719789    0.386820    0.594271    11.00000   -1.20000
AFIX   0
C18   1    0.720490    0.418595    0.718483    11.00000    0.04653    0.03765 =
         0.03829   -0.00194   -0.00590    0.00070
AFIX  43
H18   2    0.823195    0.429493    0.717765    11.00000   -1.20000
AFIX   0
C19   1    0.633883    0.427918    0.793032    11.00000    0.05148    0.03881 =
         0.03851   -0.00772   -0.00860    0.00828
AFIX  43
H19   2    0.675657    0.445498    0.843979    11.00000   -1.20000
AFIX   0
C20   1    0.486162    0.411650    0.793544    11.00000    0.05702    0.03786 =
         0.01965   -0.00627    0.00367    0.01490
AFIX  43
H20   2    0.425800    0.417776    0.845329    11.00000   -1.20000
AFIX   0
C21   1    0.424978    0.386157    0.718027    11.00000    0.03976    0.04088 =
         0.02222    0.00305    0.00480    0.01248
C22   1    0.266705    0.367687    0.709174    11.00000    0.04527    0.03406 =
         0.02150    0.00322    0.00866    0.00889
C23   1    0.166418    0.370949    0.780445    11.00000    0.05484    0.05118 =
         0.02407   -0.00058    0.01543    0.00902
AFIX  43
H23   2    0.195583    0.386615    0.837928    11.00000   -1.20000
AFIX   0
C24   1    0.024131    0.351386    0.767695    11.00000    0.05268    0.05749 =
         0.03068    0.00847    0.02056    0.02002
AFIX  43
H24   2   -0.044337    0.352542    0.817362    11.00000   -1.20000
AFIX   0
C25   1   -0.017415    0.330158    0.682056    11.00000    0.03366    0.05257 =
         0.03657    0.01289    0.01557    0.00610
AFIX  43
H25   2   -0.116383    0.316827    0.670888    11.00000   -1.20000
AFIX   0
C26   1    0.086957    0.328333    0.611566    11.00000    0.02865    0.04555 =
         0.03154    0.00689    0.00512    0.00547
AFIX  43
H26   2    0.058297    0.313259    0.552872    11.00000   -1.20000
AFIX   0
C27   1    0.537950    0.285703    0.680417    11.00000    0.01992    0.04446 =
         0.02884   -0.00256    0.00459    0.00014
AFIX  43
H27   2    0.587831    0.306107    0.719264    11.00000   -1.20000
AFIX   0
C28   1    0.559545    0.250130    0.718740    11.00000    0.02219    0.05664 =
         0.02995    0.00664    0.00573    0.00040
AFIX  43
H28   2    0.627851    0.245926    0.781386    11.00000   -1.20000
AFIX   0
C29   1    0.482044    0.220499    0.666264    11.00000    0.03266    0.04432 =
         0.04318    0.00919    0.01079    0.00137
AFIX  43
H29   2    0.494327    0.195673    0.692731    11.00000   -1.20000
AFIX   0
C30   1    0.385065    0.227310    0.573618    11.00000    0.03492    0.03656 =
         0.03136    0.00288    0.00368   -0.00550
AFIX  43
H30   2    0.327368    0.207298    0.537287    11.00000   -1.20000
AFIX   0
C31   1    0.373649    0.263362    0.535192    11.00000    0.02131    0.04104 =
         0.02472    0.00288    0.00795   -0.00049
C32   1    0.281436    0.273577    0.436407    11.00000    0.02452    0.04588 =
         0.02292   -0.00122    0.00986   -0.00252
C33   1    0.215150    0.247931    0.363944    11.00000    0.03663    0.03875 =
         0.03508   -0.00274    0.00808   -0.00308
AFIX  43
H33   2    0.223842    0.221716    0.377756    11.00000   -1.20000
AFIX   0
C34   1    0.136219    0.260392    0.271389    11.00000    0.02087    0.05789 =
         0.02343   -0.00600    0.00086   -0.00673
AFIX  43
H34   2    0.088375    0.242959    0.221721    11.00000   -1.20000
AFIX   0
C35   1    0.128119    0.298346    0.252448    11.00000    0.02923    0.05856 =
         0.01595   -0.00130    0.00060    0.00443
AFIX  43
H35   2    0.076289    0.307397    0.188750    11.00000   -1.20000
AFIX   0
C36   1    0.195182    0.323283    0.325855    11.00000    0.02034    0.05056 =
         0.02298   -0.00284    0.00585    0.00304
AFIX  43
H36   2    0.188472    0.349520    0.312095    11.00000   -1.20000
AFIX   0
P1    6    0.833996    0.206902    0.477072    11.00000    0.02787    0.07243 =
         0.02455    0.00564    0.00825    0.00303
F1    3    0.916937    0.243453    0.533262    11.00000    0.06198    0.06507 =
         0.05390   -0.00026    0.00985   -0.00472
F2    3    0.665129    0.228309    0.460049    11.00000    0.03841    0.10123 =
         0.04577    0.02108    0.01973    0.02227
F3    3    0.869740    0.222581    0.371347    11.00000    0.03135    0.11814 =
         0.03180    0.01996    0.01000    0.01007
F4    3    0.751351    0.170962    0.419657    11.00000    0.04473    0.09624 =
         0.05142   -0.01921    0.00725   -0.01642
F5    3    1.005062    0.186171    0.493138    11.00000    0.03218    0.06722 =
         0.03199    0.00564    0.00656    0.00531
F6    3    0.798705    0.190552    0.581940    11.00000    0.04406    0.07239 =
         0.02945    0.00960    0.01440    0.00214
O3    5    1.199991    0.106170    0.537126    11.00000    0.07801    0.13547 =
         0.05544   -0.00489    0.00857   -0.03221
O4    5    1.057694    0.109152    0.665865    11.00000    0.08809    0.10872 =
         0.07202    0.01022    0.03449    0.01621
C37   1    1.334217    0.123617    0.600684    11.00000    0.07271    0.10130 =
         0.06750   -0.00456   -0.00160   -0.03359
AFIX  23
H37   2    1.368335    0.108376    0.662254    11.00000   -1.20000
H37A  2    1.305127    0.149148    0.621186    11.00000   -1.20000
AFIX   0
C38   1    1.465445    0.125598    0.538146    11.00000    0.07068    0.21618 =
         0.06613   -0.04708    0.01753    0.00732
AFIX 137
H38   2    1.505072    0.100166    0.528127    11.00000   -1.50000
H38A  2    1.553633    0.141081    0.572920    11.00000   -1.50000
H38B  2    1.423711    0.136846    0.472368    11.00000   -1.50000
AFIX   0
C39   1    1.062518    0.100442    0.581569    11.00000    0.07288    0.13886 =
         0.05469    0.00374    0.01897   -0.01873
C40   1    0.929071    0.079708    0.514475    11.00000    0.05814    0.50559 =
         0.06449   -0.02556   -0.01259   -0.08470
AFIX 137
H40   2    0.883882    0.060488    0.554192    11.00000   -1.50000
H40A  2    0.972237    0.067633    0.458839    11.00000   -1.50000
H40B  2    0.844667    0.097574    0.486939    11.00000   -1.50000
AFIX   0
C41   1    0.506295    0.519668    0.996562    10.50000    0.04901    0.38350 =
         0.09818    0.10995    0.03590    0.00100
AFIX 137
H46   2    0.488533    0.541511    1.038026    10.50000   -1.50000
H47   2    0.610971    0.508410    1.022512    10.50000   -1.50000
H48   2    0.421308    0.501055    0.999285    10.50000   -1.50000
AFIX   0
O5    5    0.503483    0.531388    0.894144    10.50000    0.06313    0.38557 =
         0.09316    0.09804    0.03153    0.00618
AFIX  83
H45   2    0.484730    0.512725    0.855553    10.50000   -1.50000

AFIX   0
HKLF 4 1 1 0 0 0 1 0 0 0 1


REM  mt17Ru_a.res in P2(1)/c
REM R1 =  0.0773 for    4890 Fo > 4sig(Fo)  and  0.1512 for all    9017 data
REM    553 parameters refined using     11 restraints

END

WGHT      0.1093      3.0007

REM Highest difference peak  1.491,  deepest hole -0.793,  1-sigma level  0.144
Q1    1   0.6557  0.5241  1.0696  11.00000  0.05    1.49
Q2    1   0.5219  0.5229  1.0588  11.00000  0.05    1.46
Q3    1   1.1070  0.0581  0.4250  11.00000  0.05    1.31
;
_shelx_res_checksum   58399

_shelx_hkl_file
;
   1   0   0  440.06   39.00
   2   0   0    9.80    9.90
   3   0   0   10.10   10.60
   4   0   0   80.39   17.80
  -4   0   0   84.59   10.00
   5   0   0  828.92   82.09
  -5   0   0  894.21   75.39
  -6   0   0    4.20    4.50
   6   0   0   15.00   12.90
   7   0   0   24.20   15.40
   8   0   0   50.19   21.00
   9   0   0   38.00   21.00
  10   0   0   60.59   26.00
   1  -1   0  365.26   33.30
  -1  -1   0  381.96   31.80
   1   1   0  368.36   33.50
  -2  -1   0  954.50   79.99
   2  -1   0  960.70   82.99
   2   1   0  923.11   82.99
   3  -1   0  478.65   48.00
  -3  -1   0  501.25   43.00
   3   1   0  503.75   48.50
   4  -1   0    5.10   11.00
  -4  -1   0   16.70    4.90
   4   1   0   25.60   11.70
  -5  -1   0   52.99    7.90
   5  -1   0   34.40   14.50
  -5   1   0   45.60    7.20
   5   1   0   39.90   16.00
   6  -1   0  244.68   36.20
  -6  -1   0  221.48   23.30
  -6   1   0  250.27   23.40
   6   1   0  290.17   38.70
   7  -1   0  371.16   51.49
   7   1   0  488.85   57.39
   8  -1   0  109.39   26.60
   8   1   0   62.29   22.50
   9  -1   0    7.90   17.30
   9   1   0    6.20   16.60
  10  -1   0   11.00   19.20
  10   1   0   17.80   20.70
   1  -2   0  146.59   14.60
  -1  -2   0  117.39   11.50
   1   2   0  137.39   14.50
   2  -2   0   40.10   10.40
  -2  -2   0   53.29    6.60
   2   2   0   36.20   10.30
   3  -2   0   64.69   15.10
  -3  -2   0   74.09    8.70
   3   2   0   41.70   13.50
   4  -2   0  246.08   32.00
  -4  -2   0  267.07   24.70
   4   2   0  284.87   34.30
  -5  -2   0   94.19   11.80
   5  -2   0   90.09   20.40
   5   2   0   72.89   18.30
  -6  -2   0    4.80    4.50
   6  -2   0    8.50   12.90
  -6   2   0    3.50    4.10
   6   2   0   -5.10   10.60
   7  -2   0   -7.30   12.90
   7   2   0    6.00   16.20
   8  -2   0   11.80   16.90
   8   2   0   20.30   16.70
   9  -2   0   11.30   17.00
   9   2   0   -8.30   14.10
  10  -2   0    3.40   19.90
  10   2   0    4.40   20.10
   0  -3   0   -0.30    1.50
   0   3   0   -0.50    1.90
  -1  -3   0  725.03   60.49
   1   3   0  743.93   61.89
  -1   3   0  681.83   60.79
  -2  -3   0  123.49   12.80
   2  -3   0  137.89   18.10
   2   3   0  143.19   18.20
   3  -3   0  319.47   34.50
  -3  -3   0  355.46   30.10
   3   3   0  301.77   34.40
   4  -3   0   86.29   16.70
  -4  -3   0   78.79    9.70
   4   3   0   31.30   13.70
  -5  -3   0    2.00    3.90
   5  -3   0    9.10   10.50
   5   3   0   10.30   11.10
  -6  -3   0   28.00    7.10
   6  -3   0   67.99   19.30
  -6   3   0   33.20    7.30
   6   3   0    0.30   13.10
   7  -3   0   11.70   16.50
   7   3   0    6.60   14.50
   8  -3   0   13.10   17.20
   8   3   0    0.00   16.40
   9  -3   0    4.30   16.00
   9   3   0  -27.30   15.20
  10  -3   0  -27.70   15.70
  10   3   0   -6.80   19.10
   0  -4   0  571.74   46.50
   0   4   0  521.75   46.70
  -1  -4   0 1012.10   86.99
   1   4   0 1036.20   88.19
  -1   4   0 1051.79   87.59
  -2  -4   0  139.09   12.80
   2  -4   0   99.49   15.90
   2   4   0  131.89   17.60
   3  -4   0  612.74   57.29
  -3  -4   0  621.34   52.59
   3   4   0  572.74   56.59
  -4  -4   0    3.90    3.80
   4  -4   0   -8.20    9.60
   4   4   0    6.30   11.00
  -5  -4   0  460.75   41.60
   5  -4   0  450.85   48.40
   5   4   0  474.15   49.00
  -6  -4   0  131.19   15.70
   6  -4   0  105.59   23.40
   6   4   0  132.09   26.00
   7  -4   0   32.70   18.30
   7   4   0    3.40   15.70
   8  -4   0   22.90   15.80
   8   4   0    6.20   17.30
   9  -4   0  -14.30   13.30
   9   4   0   42.40   23.60
  10  -4   0   27.50   24.00
  10   4   0   60.39   24.40
   0  -5   0    3.70    3.00
   0   5   0   -3.20    3.40
  -1  -5   0  220.08   19.90
  -1   5   0  196.08   20.60
   1   5   0  254.07   22.30
  -2  -5   0  239.38   24.10
  -2   5   0  311.87   25.10
   2   5   0  253.97   28.90
   3  -5   0  960.10   88.49
  -3  -5   0 1005.50   84.79
   3   5   0 1007.10   88.79
  -4  -5   0   16.90    4.90
   4  -5   0   -1.70    9.10
   4   5   0   -4.20   10.60
  -5  -5   0   82.99   11.00
   5  -5   0   53.09   17.00
   5   5   0   76.29   18.40
   6  -5   0  124.99   26.50
  -6  -5   0  136.19   16.90
   6   5   0  173.08   29.50
   7  -5   0   70.99   21.40
   7   5   0   84.29   24.30
   8  -5   0   46.50   22.40
   8   5   0   50.89   22.70
   9  -5   0  -22.10   12.60
   9   5   0   -9.10   17.10
  10  -5   0   22.60   19.60
  10   5   0   20.30   20.70
   0  -6   0  518.45   45.10
   0   6   0  532.35   45.70
  -1  -6   0   12.70    4.20
   1   6   0   15.00    6.80
  -1   6   0   19.50    5.70
  -2  -6   0  233.48   22.80
   2   6   0  267.37   28.30
  -2   6   0  257.57   24.40
   3  -6   0   12.10   10.30
  -3  -6   0   -0.30    3.40
   3   6   0   -4.90    8.60
   4  -6   0   -9.50    8.70
  -4  -6   0    6.90    4.20
   4   6   0   -3.50   10.10
   5  -6   0  824.32   73.49
  -5  -6   0  748.13   66.19
   5   6   0  710.43   72.69
  -6  -6   0   35.50    7.80
   6  -6   0   32.10   14.90
   6   6   0   22.90   15.10
   7  -6   0   31.70   17.20
   7   6   0   30.80   17.00
   8  -6   0   83.39   23.80
   8   6   0   79.19   26.10
   9  -6   0   44.70   21.90
   9   6   0   78.49   26.00
  10   6   0   78.29   27.00
   0   7   0   -1.30    5.20
  -1  -7   0   97.99   11.40
   1   7   0  111.09   14.50
  -1   7   0   99.59   12.20
  -2  -7   0  258.87   23.90
  -2   7   0  260.17   25.40
   2   7   0  253.57   28.50
  -3  -7   0  318.97   29.30
   3   7   0  308.77   33.80
  -3   7   0  325.37   30.40
  -4  -7   0   37.30    7.20
   4  -7   0   40.10   13.20
   4   7   0   24.20   12.20
  -5  -7   0   36.10    7.60
   5  -7   0   31.70   13.60
   5   7   0   31.60   14.10
  -6  -7   0   13.80    5.90
   6  -7   0   22.40   13.60
   6   7   0   30.20   14.80
   7  -7   0  190.58   32.00
   7   7   0  182.88   34.20
   8  -7   0   -2.90   13.00
   8   7   0    0.70   14.80
   9  -7   0    0.80   15.90
   9   7   0  -11.60   15.00
  10   7   0   16.10   22.30
   0   8   0  484.35   43.10
  -1  -8   0  703.03   60.79
   1   8   0  707.03   62.29
  -1   8   0  713.23   61.49
  -2  -8   0   58.99    8.30
  -2   8   0   43.30    9.40
   2   8   0   40.50   11.00
  -3  -8   0   11.00    4.50
  -3   8   0   -6.60    5.10
   3   8   0   12.00   10.60
  -4  -8   0  141.39   17.30
  -4   8   0  163.28   19.30
   4   8   0  184.58   26.10
   5  -8   0   66.69   17.10
  -5  -8   0   87.89   12.00
   5   8   0   67.49   18.60
  -6  -8   0    5.50    5.10
   6  -8   0   -5.20   12.00
   6   8   0    4.30   13.90
   7  -8   0   34.80   16.10
   7   8   0    7.20   15.20
   8   8   0    6.50   15.00
   9   8   0   -2.40   17.00
  10   8   0   -1.20   19.40
 -10   8   0   10.50   12.40
   0   9   0   -4.00    5.40
  -1  -9   0  837.52   70.39
  -1   9   0  801.42   71.09
   1   9   0  818.02   71.79
  -2  -9   0   76.59   10.40
   2   9   0   71.29   13.40
  -2   9   0   87.79   12.60
  -3  -9   0   74.49   10.70
   3   9   0   71.09   15.80
  -3   9   0   93.89   13.70
  -4  -9   0  133.29   14.30
   4   9   0   81.09   19.60
  -4   9   0   88.79   15.20
  -5  -9   0  367.36   35.40
  -5   9   0  391.86   37.50
   5   9   0  399.86   47.50
  -6  -9   0  128.09   16.30
   6   9   0  101.99   24.80
   7   9   0   86.99   23.50
   8   9   0   68.49   23.30
  -8   9   0   49.99   14.40
   9   9   0   -3.40   17.00
  -9   9   0    3.80   10.80
  10   9   0    9.80   18.00
 -10   9   0   17.80   13.60
   0  10   0   20.60    7.00
  -1 -10   0  403.66   36.80
   1  10   0  413.16   38.90
  -1  10   0  422.66   37.70
  -2 -10   0   10.70    5.70
  -2  10   0    6.30    5.90
   2  10   0   15.10    9.70
  -3 -10   0  183.28   20.40
  -3  10   0  220.08   22.30
   3  10   0  248.28   29.00
  -4 -10   0  374.46   34.20
  -4  10   0  340.37   35.80
   4  10   0  390.96   40.70
  -5 -10   0  461.45   43.10
   5  10   0  478.55   50.59
  -5  10   0  472.95   45.90
  -6 -10   0  528.45   46.50
   6  10   0  416.96   55.79
  -6  10   0  507.95   49.20
  -7  10   0   50.49   13.70
   7  10   0   22.20   17.00
   8  10   0  195.08   35.80
  -8  10   0  145.49   25.60
  -9  10   0   72.89   19.10
   9  10   0   30.70   24.30
  10  10   0   10.30   22.70
 -10  10   0   59.09   19.70
   0  11   0    4.90    6.00
  -1 -11   0  185.48   18.40
   1  11   0  175.68   21.40
  -1  11   0  190.18   19.90
  -2 -11   0  314.47   28.30
   2  11   0  249.08   30.30
  -2  11   0  320.67   29.30
  -3 -11   0  110.39   13.80
   3  11   0  117.39   19.60
  -3  11   0   93.49   14.90
  -4 -11   0  184.48   19.90
   4  11   0  215.48   29.10
  -4  11   0  186.38   24.00
  -5 -11   0  216.68   23.90
  -5  11   0  256.97   30.50
   5  11   0  288.87   36.20
  -6 -11   0  395.76   37.60
   6  11   0  344.37   48.90
  -6  11   0  408.66   40.90
   7  11   0  122.79   29.50
  -7  11   0  125.79   21.50
   8  11   0   80.89   27.40
  -8  11   0  105.09   21.70
   9  11   0  -19.60   14.90
  -9  11   0    3.60   10.50
  10  11   0   40.10   26.30
 -10  11   0   38.60   17.70
   0  12   0  841.72   73.89
  -1 -12   0   36.80    7.40
  -1  12   0   56.79    9.30
   1  12   0   33.80   10.20
  -2 -12   0   13.80    5.20
  -2  12   0   11.30    6.70
   2  12   0   -7.70    7.20
  -3 -12   0  472.65   41.40
  -3  12   0  460.05   42.80
   3  12   0  412.16   44.90
  -4 -12   0   33.60    8.00
  -4  12   0   43.90   10.70
   4  12   0   52.79   15.10
  -5 -12   0  205.38   23.40
   5  12   0  237.78   32.80
  -5  12   0  178.48   25.00
  -6 -12   0  298.97   30.50
  -6  12   0  353.06   38.50
   6  12   0  259.37   40.00
  -7 -12   0   36.80   10.40
   7  12   0   25.40   18.20
  -7  12   0   23.90   12.20
  -8  12   0   31.60   13.40
   8  12   0   14.60   17.50
  -9  12   0  -10.20   10.10
   9  12   0   18.90   21.30
 -10  12   0   70.89   21.70
  10  12   0   49.50   25.80
   0  13   0    4.50    7.20
  -1 -13   0   26.80    7.40
   1  13   0   35.00    9.80
  -1  13   0   33.80    8.30
  -2 -13   0  195.38   20.30
  -2  13   0  188.48   22.50
   2  13   0  230.38   26.70
  -3 -13   0   97.09   13.80
   3  13   0  117.29   18.70
  -3  13   0   88.79   15.20
  -4 -13   0  116.89   15.90
   4  13   0  128.89   21.90
  -4  13   0  111.39   17.80
  -5 -13   0   88.49   13.50
   5  13   0   74.29   19.30
  -5  13   0   76.49   15.60
  -6 -13   0   15.60    7.10
   6  13   0   13.80   13.30
  -6  13   0   11.50   10.40
  -7 -13   0   28.60    8.70
   7  13   0   12.40   14.80
  -7  13   0   10.90   10.60
   8  13   0   -7.10   17.40
  -8  13   0   -0.50   10.90
  -9  13   0    0.10   10.60
   9  13   0    0.00   16.30
 -10  13   0    8.30   12.40
  10  13   0  -13.90   16.40
   0  14   0    7.60    7.30
  -1 -14   0  486.55   44.30
   1  14   0  527.95   46.90
  -1  14   0  470.15   45.00
  -2 -14   0   -3.20    4.10
   2  14   0   -2.60    8.80
  -2  14   0    5.80    6.90
  -3 -14   0   59.09   10.30
  -3  14   0   59.09   11.50
   3  14   0   54.19   15.40
  -4 -14   0  225.28   23.70
  -4  14   0  217.88   27.10
   4  14   0  252.27   32.50
  -5 -14   0   62.09   11.70
  -5  14   0   68.19   14.80
   5  14   0   63.99   19.50
  -6 -14   0   28.00    8.70
   6  14   0   12.10   14.20
  -6  14   0   25.00   11.00
  -7 -14   0   36.10   10.00
  -7  14   0   31.00   12.00
   7  14   0   21.20   15.60
   8  14   0   88.29   25.40
  -8  14   0   66.89   19.50
  -9  14   0   75.89   19.60
   9  14   0  126.59   31.50
  10  14   0  -11.40   16.50
 -10  14   0   17.10   14.50
   0  15   0    9.10    7.10
  -1 -15   0  252.07   25.20
   1  15   0  287.37   30.50
  -1  15   0  246.88   26.60
  -2 -15   0  468.05   43.80
  -2  15   0  499.05   45.20
   2  15   0  479.55   46.90
  -3 -15   0  388.96   36.00
   3  15   0  398.96   41.10
  -3  15   0  358.16   37.00
  -4 -15   0   31.80    8.70
   4  15   0   75.49   18.40
  -4  15   0   38.60   10.50
  -5 -15   0   20.00    8.00
  -5  15   0   17.20    9.00
   5  15   0   41.80   16.30
  -6 -15   0  193.48   23.00
   6  15   0  170.78   30.20
  -6  15   0  145.39   24.00
  -7 -15   0   81.89   15.00
  -7  15   0  113.09   21.20
   7  15   0   94.29   25.90
  -8  15   0    8.20   12.40
   8  15   0   25.90   20.50
   9  15   0   40.80   23.00
  -9  15   0   19.70   12.70
 -10  15   0    6.10   13.00
  10  15   0    0.50   19.50
   0  16   0  259.87   27.20
  -1 -16   0  468.05   41.00
  -1  16   0  468.05   42.40
   1  16   0  390.56   42.50
  -2 -16   0  262.27   26.50
  -2  16   0  257.57   27.40
   2  16   0  271.57   31.80
  -3 -16   0   60.99   11.10
   3  16   0   63.69   16.20
  -3  16   0   52.19   11.80
  -4 -16   0  301.57   29.30
   4  16   0  327.37   39.70
  -4  16   0  249.28   31.80
  -5 -16   0  258.57   27.00
  -5  16   0  243.28   30.90
   5  16   0  257.17   37.20
  -6 -16   0   18.30    9.00
   6  16   0   -8.80   13.70
  -6  16   0   36.20   11.80
  -7 -16   0    4.50    7.10
   7  16   0   26.50   16.80
  -7  16   0   -5.10    8.00
   8  16   0   33.20   20.20
  -8  16   0   88.49   19.20
  -9  16   0   71.79   19.10
   9  16   0   59.29   26.20
  10  16   0   48.10   24.60
 -10  16   0    9.40   12.30
   0  17   0   -0.40    6.70
  -1 -17   0   15.60    6.50
   1  17   0   13.80    9.40
  -1  17   0    3.80    6.90
  -2 -17   0  648.74   57.39
   2  17   0  594.34   59.89
  -2  17   0  657.83   58.59
  -3 -17   0  244.38   25.40
   3  17   0  210.48   30.60
  -3  17   0  272.17   29.60
  -4 -17   0   33.40    9.20
  -4  17   0   25.20    9.40
   4  17   0   21.40   13.50
  -5 -17   0   -1.60    5.70
  -5  17   0   11.00    8.80
   5  17   0   14.40   12.70
  -6 -17   0   74.69   14.10
   6  17   0   58.49   21.00
  -6  17   0   86.49   17.50
  -7 -17   0   47.80   11.80
  -7  17   0   53.99   16.30
   7  17   0   39.00   21.20
  -8  17   0   10.10   11.10
   8  17   0   38.40   20.30
   9  17   0   52.39   27.00
  -9  17   0   22.40   13.70
  10  17   0   -9.10   17.00
 -10  17   0   20.30   14.50
   0  18   0   67.59   13.90
  -1 -18   0  151.98   19.30
   1  18   0  178.78   23.20
  -1  18   0  169.78   21.10
  -2 -18   0    4.50    5.90
  -2  18   0   -1.10    6.10
   2  18   0    4.50    1.20
   2  18   0   17.10    9.80
  -3 -18   0   76.69   12.70
  -3  18   0   85.29   15.30
   3  18   0   77.79   17.00
  -4 -18   0   85.09   13.40
  -4  18   0   38.30   11.80
   4  18   0   73.39   18.20
  -5 -18   0   -1.40    6.50
   5  18   0   13.70   14.40
  -5  18   0   15.80    9.80
  -6 -18   0    2.30    6.50
  -6  18   0  -12.40    6.60
   6  18   0    8.80   13.50
  -7 -18   0   -7.10    6.70
   7  18   0   16.00   15.50
  -7  18   0    2.10    9.00
  -8  18   0    1.20    9.80
   8  18   0    3.00   17.70
   9  18   0   23.00   21.80
  -9  18   0   24.50   13.80
   0  19   0   -0.40    8.20
  -1  19   0   -5.00    6.20
   1  19   0    1.10    8.70
  -2 -19   0  219.68   25.40
   2  19   0  216.88   18.90
   2  19   0  241.18   29.60
  -2  19   0  241.88   27.50
  -3 -19   0    1.40    6.20
   3  19   0   -2.60    9.40
  -3  19   0   -3.20    6.60
  -4 -19   0   13.60    7.60
  -4  19   0    0.80    7.40
   4  19   0   10.00   13.30
  -5 -19   0    4.00    7.00
  -5  19   0    8.40    9.60
   5  19   0   -6.00   11.80
  -6 -19   0    6.00    7.90
  -6  19   0   -1.30    9.10
   6  19   0    5.30   13.40
  -7 -19   0   -6.40    7.40
   7  19   0  -11.00   12.70
  -7  19   0    8.40   10.10
   8  19   0   10.30   18.30
  -8  19   0   -4.10   10.50
   9  19   0    3.80   21.60
  -9  19   0   17.60   14.50
   0  20   0  212.88   26.50
  -1  20   0   16.70    9.20
   1  20   0    0.50    9.50
  -2 -20   0   16.90    7.50
  -2  20   0   46.90   11.60
   2  20   0   23.10   10.90
  -3 -20   0   -0.90    5.30
  -3  20   0    7.40    8.80
   3  20   0   -2.00    9.80
  -4 -20   0  185.18   23.30
   4  20   0  161.48   29.00
  -4  20   0  187.98   25.60
  -5 -20   0  304.57   32.80
  -5  20   0  220.48   32.20
   5  20   0  343.37   43.40
  -6 -20   0   96.19   16.40
  -6  20   0   66.99   16.50
   6  20   0   87.39   25.00
  -7 -20   0   -0.80    7.60
   7  20   0    5.70   15.60
  -7  20   0   20.40   11.10
   8  20   0    5.60   18.60
  -8  20   0   -0.90   10.50
  -9  20   0   32.10   15.90
   9  20   0    5.10   21.30
   0  21   0   -2.70    7.40
  -1  21   0  312.37   34.20
   1  21   0  360.06   36.80
  -2 -21   0  186.18   23.00
  -2  21   0  228.38   26.50
   2  21   0  157.18   25.60
  -3 -21   0  145.59   19.80
   3  21   0  167.98   26.60
  -3  21   0  136.99   20.80
  -4 -21   0   32.00   10.00
   4  21   0   15.20   14.80
  -4  21   0   31.50   11.00
  -5 -21   0    0.30    6.60
   5  21   0   15.40   15.90
  -5  21   0    9.00    9.60
  -6 -21   0  141.39   20.50
   6  21   0  132.39   29.00
  -6  21   0  110.39   22.60
  -7 -21   0  165.88   24.00
  -7  21   0  185.08   29.10
   7  21   0  144.79   31.90
  -8  21   0   -2.40   10.40
   8  21   0    8.10   17.10
   9  21   0   20.60   22.40
  -9  21   0   15.30   14.00
   0  22   0  299.57   35.10
   1  22   0  231.88   30.20
  -1  22   0  240.18   28.90
  -2 -22   0   47.50   10.60
   2  22   0   46.20   14.30
  -2  22   0   23.00   10.60
  -3 -22   0    5.80    7.60
  -3  22   0   10.40    9.10
   3  22   0   15.70   12.20
  -4 -22   0  353.86   34.90
   4  22   0  254.27   40.60
  -4  22   0  373.96   37.40
  -5 -22   0  233.98   26.10
   5  22   0  199.68   32.70
  -5  22   0  126.09   23.30
  -6 -22   0   29.00   10.80
  -6  22   0   14.60   10.90
   6  22   0  104.29   24.40
  -7 -22   0   -1.20    8.00
   7  22   0  -12.40   12.90
  -7  22   0    5.90   10.90
  -8  22   0   -3.40   10.50
   8  22   0   16.90   17.70
  -9  22   0   16.30   14.00
   9  22   0   -2.70   19.80
   0  23   0   -6.20    9.20
   1  23   0   21.70   11.30
  -1  23   0   12.20    8.50
  -2 -23   0   14.00    7.80
   2  23   0   21.40   12.80
  -2  23   0    2.90    7.90
  -3 -23   0   12.20    8.60
  -3  23   0   -3.70    8.10
   3  23   0   29.10   14.40
  -4 -23   0    7.30    7.50
   4  23   0   11.30   14.80
  -4  23   0    1.00    8.30
  -5 -23   0   15.30    9.40
   5  23   0   30.40   16.80
  -5  23   0   32.30   11.70
  -6 -23   0   21.50   10.90
  -6  23   0   20.20   11.30
   6  23   0    8.50   15.80
  -7 -23   0   11.30    9.70
  -7  23   0    4.00   10.50
   7  23   0   -2.30   14.90
  -8  23   0   12.50   11.40
   8  23   0   12.70   21.00
   9  23   0   -4.10   21.30
  -9  23   0   17.10   12.50
   0  24   0   25.70   11.70
   1  24   0   -2.70   10.90
  -1  24   0    2.00    8.10
   2  24   0   -9.00    9.40
  -2  24   0   13.30    9.10
  -3 -24   0  317.57   31.00
  -3  24   0  256.47   33.50
   3  24   0  231.08   35.40
  -4 -24   0   -4.70    7.40
   4  24   0   16.40   14.70
  -4  24   0   14.90   10.40
  -5 -24   0   20.50   10.80
   5  24   0   41.10   18.50
  -5  24   0   35.40   13.80
  -6 -24   0   14.00    9.00
  -6  24   0    0.90    8.80
   6  24   0   23.00   16.40
  -7 -24   0   -1.50    8.20
   7  24   0  -13.10   16.20
  -7  24   0  -10.50    9.60
  -8  24   0   39.00   15.40
   8  24   0   10.80   18.90
  -9  24   0   10.20   12.80
   9  24   0   -9.60   17.70
   0  25   0   -8.20    7.80
  -1  25   0   73.19   15.50
   1  25   0   76.29   17.70
  -2  25   0  111.79   19.30
   2  25   0   97.59   20.50
  -3 -25   0  124.79   19.60
   3  25   0   90.69   22.20
  -3  25   0  146.09   22.00
  -4 -25   0    0.50    7.80
   4  25   0   -1.10   13.80
  -4  25   0  -10.70    6.80
  -5 -25   0   -2.80    6.50
   5  25   0    8.80   13.70
  -5  25   0   10.90   10.80
  -6 -25   0   36.10   12.10
   6  25   0   99.09   26.10
  -6  25   0   42.90   13.40
  -7 -25   0   40.40   13.70
   7  25   0   52.89   20.80
  -7  25   0   26.90   13.50
   8  25   0  101.99   29.10
  -8  25   0   65.49   18.90
  -9  25   0    5.70   14.80
   9  25   0   -1.50   21.10
   0  26   0  234.98   31.20
   1  26   0  214.78   31.40
  -1  26   0  248.08   30.90
   2  26   0   -6.50   10.60
  -2  26   0   -3.30    7.40
  -3 -26   0  162.58   23.00
   3  26   0  167.98   27.70
  -3  26   0  106.79   20.70
  -4 -26   0  253.67   28.60
   4  26   0  218.18   34.50
  -4  26   0  138.49   24.80
  -5 -26   0  144.99   22.40
   5  26   0  146.89   30.70
  -5  26   0  157.38   26.00
  -6 -26   0   31.40   11.60
  -6  26   0   21.00   11.60
   6  26   0   26.70   18.20
  -7 -26   0   -7.90    9.50
  -7  26   0   11.00   13.20
   7  26   0   19.90   19.30
  -8  26   0   35.30   14.80
   8  26   0   -8.60   18.30
   0  27   0   -0.10    9.60
   1  27   0   83.99   20.00
  -1  27   0   86.39   17.50
  -2  27   0   86.69   17.30
   2  27   0  100.79   21.70
  -3  27   0   61.59   15.10
   3  27   0   63.59   20.20
  -4 -27   0   30.20   12.20
  -4  27   0   55.49   14.40
   4  27   0   33.70   19.10
  -5 -27   0   23.30   10.30
  -5  27   0   46.90   15.20
   5  27   0  -11.30   14.40
  -6 -27   0   77.89   16.30
  -6  27   0   58.99   16.50
   6  27   0   36.20   20.40
  -7 -27   0   66.29   16.10
   7  27   0   68.79   25.70
  -7  27   0   52.09   16.30
   8  27   0   -0.30   19.80
  -8  27   0   31.50   16.60
   0  28   0    9.50   12.30
  -1  28   0   64.89   16.50
   1  28   0   56.09   17.40
   2  28   0    2.60   12.60
  -2  28   0   25.90   12.00
   3  28   0   19.90   14.10
  -3  28   0   21.00   11.50
  -4 -28   0   19.30   10.90
   4  28   0   11.70   15.40
  -4  28   0   12.30   10.10
  -5 -28   0    2.70    8.50
   5  28   0    1.30   15.50
  -5  28   0   13.40   12.10
  -6 -28   0   11.40    9.70
  -6  28   0    7.60    9.60
   6  28   0   -7.50   17.00
  -7 -28   0   24.40   12.60
  -7  28   0   -0.90   10.60
   7  28   0    6.00   18.20
  -8  28   0   44.10   16.60
   8  28   0   60.69   24.80
   0  29   0   -1.40   11.30
   1  29   0   17.20   12.30
  -1  29   0   11.00   11.80
   2  29   0   15.70   14.60
  -2  29   0    4.60    9.60
  -3  29   0   -2.00    8.30
   3  29   0   18.70   15.40
  -4  29   0   -7.20    8.90
   4  29   0  -11.00   11.80
  -5 -29   0  -10.70    7.90
  -5  29   0   -3.80    9.40
   5  29   0  -17.00   14.60
  -6 -29   0    2.60    9.60
   6  29   0   16.30   17.80
  -6  29   0   20.40   13.00
  -7 -29   0    0.90    9.90
   7  29   0    9.90   20.50
  -7  29   0   20.80   12.60
   8  29   0   -8.20   18.40
  -8  29   0   -8.80    9.10
   0  30   0   94.29   19.90
  -1  30   0   50.79   15.10
   1  30   0   70.39   20.20
   2  30   0    8.60   14.60
  -2  30   0   21.40   11.40
   3  30   0  -13.00   15.00
  -3  30   0   12.90   12.10
  -4  30   0  -17.30    8.30
   4  30   0    3.90   15.70
   5  30   0   50.19   23.20
  -5  30   0   26.20   12.20
  -6 -30   0   28.00   12.90
  -6  30   0   20.50   13.80
   6  30   0   27.10   21.50
  -7 -30   0   16.30   11.20
   7  30   0   -2.80   19.50
  -7  30   0    1.90   10.30
  -8  30   0   32.50   16.00
   8  30   0   14.30   22.30
   0  31   0    4.60   10.80
   1  31   0   63.89   20.20
  -1  31   0   67.29   17.70
  -2  31   0   98.59   19.60
   2  31   0   71.49   21.40
   3  31   0   13.10   14.70
  -3  31   0   -4.20    8.50
   4  31   0   -5.60   15.30
  -4  31   0    4.90   10.20
  -5  31   0    6.70   11.20
   5  31   0   19.60   19.80
  -6  31   0   91.29   20.30
   6  31   0   64.59   26.30
  -7  31   0    7.60   11.90
   7  31   0   18.00   21.30
   8  31   0   11.20   22.20
   0  32   0  153.98   27.60
  -1  32   0  187.58   31.50
   1  32   0  248.98   34.70
   2  32   0   36.50   16.40
  -2  32   0   27.00   12.70
  -3  32   0    2.50   10.70
   3  32   0   -6.10   13.70
   4  32   0   32.60   19.30
  -4  32   0    4.30   11.50
   5  32   0   69.79   24.10
  -5  32   0   70.79   19.50
   6  32   0   -1.50   18.90
  -6  32   0   26.20   12.70
  -7  32   0  -13.70   11.00
   7  32   0   -9.80   19.10
   0  33   0  -10.20   10.10
  -1  33   0   45.90   16.10
   1  33   0   51.99   18.50
   2  33   0   28.20   18.90
  -2  33   0   65.09   17.10
   3  33   0    5.00   14.90
  -3  33   0    8.60   11.00
  -4  33   0    7.90   11.00
   4  33   0  -17.40   12.20
   5  33   0   -3.70   17.80
  -5  33   0    8.10   11.40
  -6  33   0   17.80   13.40
   6  33   0  -16.90   17.60
   7  33   0    2.80   21.00
  -7  33   0   -3.00   10.00
   0  34   0    2.30   11.40
   1  34   0   13.60   15.50
  -1  34   0   11.20   12.00
  -2  34   0   -2.60   10.10
   2  34   0    3.00   15.40
   3  34   0   20.90   16.80
  -3  34   0   13.50   11.80
  -4  34   0    3.00   11.00
   4  34   0   -5.80   16.80
  -5  34   0    4.90   12.10
   5  34   0    0.20   18.50
   6  34   0   -1.70   19.80
  -6  34   0   13.90   13.30
  -7  34   0   19.90   14.90
   7  34   0    5.80   19.30
   0  35   0    7.60   12.50
  -1  35   0   -7.20   12.90
   1  35   0   -7.10   14.60
   2  35   0   49.60   18.70
  -2  35   0   10.50   11.80
   3  35   0   26.10   18.10
  -3  35   0   44.20   15.80
  -4  35   0   12.60   11.90
   4  35   0   19.10   20.70
   5  35   0   -0.90   18.00
  -5  35   0   21.80   13.00
  -6  35   0   13.60   13.70
   6  35   0   21.50   22.70
   7  35   0   49.80   25.70
   0  36   0  158.28   29.60
  -1  36   0   34.10   16.00
   1  36   0   18.60   17.30
   2  36   0   -5.50   14.80
  -2  36   0   15.70   12.80
   3  36   0   -3.00   15.70
  -3  36   0   20.80   14.80
  -4  36   0   68.79   18.10
   4  36   0   24.20   21.10
   5  36   0  101.39   27.60
  -5  36   0   51.99   19.70
  -6  36   0   -0.20   12.70
   6  36   0   10.50   18.30
   0  37   0   13.60   15.30
  -1  37   0   45.80   18.00
   1  37   0   57.39   20.10
  -2  37   0   59.89   17.90
   2  37   0   51.19   20.90
   3  37   0   31.00   20.70
  -3  37   0    8.20   13.60
   4  37   0   12.40   17.20
  -4  37   0   -1.90   12.00
   5  37   0    9.90   19.80
  -5  37   0   -4.10   11.20
   6  37   0   29.20   24.90
  -6  37   0    5.80   13.60
   0  38   0   17.60   14.70
   1  38   0   -5.50   13.30
  -1  38   0   17.60   16.30
   2  38   0   28.60   18.50
  -2  38   0    2.60   12.00
  -3  38   0   -9.20   11.20
   3  38   0   12.30   20.00
  -4  38   0   26.20   15.60
   4  38   0   29.10   19.80
   5  38   0  -21.70   15.50
  -5  38   0   22.40   15.80
  -6  38   0   -9.70   11.40
   6  38   0  -17.20   18.80
   0  39   0    4.40   13.40
   1  39   0   33.80   17.60
  -1  39   0    7.20   12.80
   2  39   0   -7.90   15.70
  -2  39   0  -10.20   12.40
  -3  39   0   -0.30   12.80
   3  39   0  -10.10   15.40
   4  39   0    2.60   17.40
  -4  39   0    2.70   11.80
  -5  39   0   12.60   13.30
   5  39   0   17.40   21.60
   0  40   0   27.00   18.70
  -1  40   0   33.60   18.10
   1  40   0    3.10   15.00
  -2  40   0    8.10   15.10
   2  40   0    2.50   14.30
  -3  40   0   -4.40   12.90
   3  40   0   -2.00   16.80
  -4  40   0    5.00   12.40
   4  40   0    9.20   19.50
  -5  40   0   28.50   14.80
   5  40   0   -5.40   19.40
   0  41   0   -4.80   14.70
   1  41   0   22.50   17.90
  -1  41   0   35.30   17.50
  -2  41   0   -3.50   14.90
   2  41   0    6.80   17.60
  -3  41   0   22.90   16.20
   3  41   0   48.60   24.70
   4  41   0   -3.10   17.90
  -4  41   0    0.50   13.90
   0  42   0   59.69   21.60
  -1  42   0   10.10   17.40
   1  42   0   38.00   19.00
   2  42   0   14.20   19.30
  -2  42   0    6.60   13.80
  -3  42   0  -10.90   12.70
   3  42   0   -9.40   15.00
   4  42   0   16.30   23.30
  -4  42   0   65.99   21.20
   0  43   0   -0.20   16.70
   1  43   0   -7.40   15.20
  -1  43   0   17.70   16.40
  -2  43   0   67.29   21.40
   2  43   0   41.90   23.90
  -3  43   0   -8.60   13.50
   3  43   0   -2.30   20.20
   0  44   0   23.00   20.30
   1  44   0    8.40   17.00
  -1  44   0   10.60   17.20
   2  44   0   -1.50   16.00
  -2  44   0   -0.20   15.50
  -3  44   0   10.00   16.20
   3  44   0   -9.40   19.10
   0  45   0  -14.70   15.00
  -1  45   0   29.70   18.40
   1  45   0  -29.00   12.10
  -2  45   0   15.80   18.50
   2  45   0   -0.50   18.20
   0  46   0   -5.60   15.20
  10   0  -1   32.00   22.00
   9   0  -1  -13.20   13.40
   8   0  -1   -6.80   15.20
   7   0  -1   -5.70   14.40
   6   0  -1    6.80   12.10
  -6   0   1   13.40    4.80
   5   0  -1    5.20   10.60
   4   0  -1   12.70    9.80
   3   0  -1   -6.30    8.70
   2   0  -1  -12.70    6.90
   1   0  -1    4.50    4.10
   0   0   1   -1.40    0.80
   1   0   1   -0.70    5.20
   1   0   1   -1.30    2.00
  -2   0  -1   -2.80    2.20
   2   0   1   -3.50    7.70
   2   0   1    5.30    3.40
   3   0   1   -5.20    8.70
  -3   0  -1   -1.70    2.60
  -4   0  -1   -0.10    3.00
   4   0   1   -6.40    9.60
   5   0   1  -22.70   10.60
  -5   0  -1    3.00    3.60
   6   0   1   -1.60   11.30
   7   0   1   10.30   15.80
   8   0   1   -9.20   12.80
   9   0   1   35.60   21.30
  10   0   1   -6.10   16.10
  10  -1  -1   44.10   22.20
  10   1  -1   15.90   19.90
   9  -1  -1   62.89   21.80
   9   1  -1   34.40   20.60
   8  -1  -1   -8.40   14.40
   8   1  -1   21.60   17.50
   7  -1  -1  -11.20   13.60
   7   1  -1   10.70   15.20
   6  -1  -1  144.39   25.70
  -6  -1   1  117.69   15.20
   6   1  -1  106.49   23.40
  -5  -1   1  408.86   36.70
   5  -1  -1  388.66   43.10
   5   1  -1  402.46   46.80
   4  -1  -1   83.89   16.00
   4   1  -1   58.89   14.80
   3  -1  -1  412.66   41.80
   3   1  -1  458.25   42.70
   2  -1  -1   68.59   12.20
   2   1  -1   72.59   12.60
   1  -1  -1  352.66   32.40
   1   1  -1  384.86   32.40
   0  -1   1 1518.35  126.59
   0   1   1 1523.45  126.59
   0   1   1 1509.55  126.89
   1  -1   1  115.89   10.60
  -1  -1  -1  113.29   10.20
   1   1   1   95.29   13.20
   1   1   1  121.99   10.40
  -2  -1  -1   87.69    8.50
   2  -1   1  103.49    9.70
   2  -1   1   83.19   14.40
   2   1   1   81.79    8.90
   2   1   1   88.09   14.40
  -2   1  -1   78.29    8.00
  -3  -1  -1  303.97   26.30
   3  -1   1  291.17   33.90
  -3   1  -1  292.77   26.00
   3   1   1  279.07   34.70
   3   1   1  303.87   26.50
   4  -1   1   49.00   15.00
  -4  -1  -1   86.29    9.40
  -4   1  -1   71.49    8.80
   4   1   1   84.19   18.60
   5  -1   1   65.19   18.50
  -5  -1  -1   62.89    8.50
   5   1   1   61.69   17.70
  -5   1  -1   53.49    7.90
   6  -1   1   46.00   17.10
   6   1   1   89.59   22.00
   7  -1   1   15.30   15.10
   7   1   1   20.20   16.90
   8  -1   1   14.70   16.60
   8   1   1   -8.10   15.80
   9  -1   1  -26.40   15.00
   9   1   1   -0.80   16.50
  10  -1   1   16.30   21.40
  10   1   1   18.60   22.40
  10  -2  -1   26.90   21.70
  10   2  -1  -15.10   15.60
   9  -2  -1   26.40   17.50
   9   2  -1    2.60   16.50
   8  -2  -1   -0.80   16.00
   8   2  -1   39.10   17.60
   7  -2  -1  509.05   57.59
   7   2  -1  381.26   52.09
  -6  -2   1  274.67   26.00
   6  -2  -1  242.98   35.70
   6   2  -1  240.68   36.40
   5  -2  -1   -2.60   10.80
  -5  -2   1    6.00    4.30
   5   2  -1    6.20   10.30
  -4  -2   1  130.19   13.70
   4  -2  -1  139.99   21.00
   4   2  -1  107.19   20.30
   3  -2  -1  144.49   19.60
   3   2  -1   92.19   16.40
   2  -2  -1  676.83   61.59
   2   2  -1  710.63   61.49
  -1  -2   1 1908.11  161.48
   1   2  -1 1956.10  162.58
  -1   2   1 1946.71  162.08
   0  -2   1   14.60    2.10
   0  -2   1   18.20    2.70
   0   2   1   19.10    3.40
   0   2  -1   20.20    2.70
   0   2   1   16.30    2.10
   1  -2   1 1041.50   90.29
   1  -2   1 1088.09   88.59
  -1  -2  -1 1061.49   88.39
   1   2   1 1039.80   90.39
   1   2   1 1034.80   88.29
  -2  -2  -1    4.10    2.80
   2  -2   1   10.20    4.00
   2  -2   1    5.80    8.10
   2   2   1    8.10    3.00
   2   2   1    3.20    9.20
  -3  -2  -1  370.46   32.30
   3  -2   1  354.86   38.20
   3   2   1  364.56   32.40
   3   2   1  396.36   39.10
  -4  -2  -1    8.90    3.90
   4  -2   1    0.50   10.90
  -4   2  -1    8.70    3.20
   4   2   1   14.80   11.00
   5  -2   1   27.20   14.60
  -5  -2  -1   24.00    5.30
   5   2   1    5.30   12.00
  -5   2  -1   21.50    4.80
   6  -2   1  293.77   39.10
   6   2   1  224.98   37.40
   7  -2   1  239.78   37.90
   7   2   1  251.37   39.00
   8  -2   1  315.97   47.80
   8   2   1  291.17   47.00
   9  -2   1   12.00   18.90
   9   2   1   28.20   20.60
  10  -2   1    1.00   19.90
  10   2   1   27.60   20.30
  10  -3  -1  104.29   31.30
  10   3  -1   89.29   30.70
   9  -3  -1  155.98   31.70
   9   3  -1   77.79   25.70
   8  -3  -1   33.80   18.60
   8   3  -1   76.99   23.90
   7  -3  -1   13.10   15.10
   7   3  -1   15.50   14.80
   6  -3  -1  102.39   22.70
  -6  -3   1  113.19   14.20
   6   3  -1   66.29   19.40
  -5  -3   1   82.69   11.30
   5  -3  -1   59.39   16.40
   5   3  -1   84.49   19.40
   4  -3  -1 1407.86  118.39
  -4  -3   1 1315.27  113.59
   4   3  -1 1289.17  118.09
  -3  -3   1  139.99   15.40
   3  -3  -1  192.08   23.00
   3   3  -1  173.78   22.20
   2  -3  -1  141.89   17.30
  -2  -3   1  128.99   13.20
   2   3  -1  139.29   17.10
  -1  -3   1 2487.45  210.38
  -1  -3   1 2523.55  211.28
  -1   3   1 2439.56  211.28
   1   3  -1 2660.33  211.78
   0  -3   1 1034.90   87.59
   0  -3   1 1067.69   87.79
   0   3   1 1010.90   88.19
   0   3   1 1036.10   87.49
   0   3  -1 1082.69   87.89
  -1  -3  -1 4805.22  399.66
   1  -3   1 4897.81  399.66
   1  -3   1 4789.52  401.16
   1   3   1 4656.13  401.26
   1   3   1 4802.42  399.16
   2  -3   1  485.95   43.10
  -2  -3  -1  518.35   42.80
   2  -3   1  454.45   46.30
   2   3   1  501.45   42.50
   2   3   1  526.35   46.80
   3  -3   1  209.08   27.10
  -3  -3  -1  212.38   19.80
   3   3   1  215.88   19.70
   3   3   1  242.88   28.60
  -4  -3  -1   45.40    7.00
   4  -3   1   44.40   14.00
   4   3   1   45.00   14.10
  -5  -3  -1  135.29   14.60
   5  -3   1   97.89   21.30
   5   3   1  138.89   24.20
  -5   3  -1  125.79   12.80
   6  -3   1  601.84   60.19
   6   3   1  532.75   59.69
   7  -3   1    5.50   14.20
   7   3   1  -24.30   12.50
   8  -3   1   31.00   17.80
   8   3   1   10.30   17.50
   9  -3   1    9.80   17.80
   9   3   1   27.20   19.10
  10  -3   1   22.00   20.80
  10   3   1   73.29   29.60
  10  -4  -1   18.90   21.10
  10   4  -1   19.90   21.00
   9  -4  -1  -23.10   14.40
   9   4  -1    9.40   16.60
   8  -4  -1   26.40   18.50
   8   4  -1   38.90   19.90
   7  -4  -1  115.89   25.80
  -7  -4   1   96.69   16.40
   7   4  -1  126.79   26.70
  -6  -4   1  154.98   18.10
   6  -4  -1  118.69   25.80
   6   4  -1  142.39   27.30
   5  -4  -1  227.78   31.10
  -5  -4   1  212.78   21.00
   5   4  -1  170.28   28.00
  -4  -4   1  194.78   18.00
   4  -4  -1  195.58   25.30
   4   4  -1  117.09   22.20
  -3  -4   1   12.90    4.60
   3  -4  -1   20.80   10.90
   3   4  -1   15.40   10.30
  -2  -4   1  405.86   35.90
  -2   4   1  405.96   36.20
   2   4  -1  408.16   38.50
  -1  -4   1  889.01   75.99
  -1  -4   1  900.21   76.99
  -1   4   1  920.01   77.29
   1   4  -1  941.51   77.69
   0  -4   1  166.78   14.90
   0  -4   1  160.98   14.40
   0   4  -1  171.88   15.20
   0   4   1  169.08   14.40
   0   4   1  161.98   15.70
  -1  -4  -1 2188.88  180.38
   1  -4   1 2121.69  180.28
  -1   4  -1 2145.79  180.78
   1   4   1 2141.69  181.98
   1   4   1 2172.08  179.68
   2  -4   1  156.08   19.80
  -2  -4  -1  134.69   14.20
   2  -4   1  155.38   14.60
   2   4   1  181.58   21.40
   2   4   1  154.98   13.70
   3  -4   1   95.19   17.40
  -3  -4  -1  104.29   11.20
   3   4   1   81.59   17.00
   3   4   1  117.59   10.80
  -4  -4  -1  239.68   21.70
   4  -4   1  253.87   31.20
   4   4   1  178.08   28.90
   5  -4   1   -5.70    9.70
  -5  -4  -1    0.30    3.50
   5   4   1   17.10   13.70
   6  -4   1    9.10   14.00
   6   4   1   39.20   16.20
   7  -4   1   35.30   17.70
   7   4   1   44.50   19.00
   8  -4   1   59.99   22.00
   8   4   1   76.39   24.20
   9  -4   1   -0.10   17.30
   9   4   1   -3.30   14.40
  10  -4   1   67.19   26.40
  10   4   1   42.80   23.50
  10  -5  -1   -9.30   14.00
  10   5  -1   -9.90   16.80
   9  -5  -1   23.10   19.60
   9   5  -1   34.20   21.50
   8  -5  -1   15.30   14.70
   8   5  -1   -9.80   13.00
   7  -5  -1    6.40   14.50
  -7  -5   1    2.90    5.60
   7   5  -1   33.10   17.90
   6  -5  -1   20.30   13.50
  -6  -5   1   29.60    7.30
   6   5  -1   -7.70   13.40
  -5  -5   1    3.30    4.30
   5  -5  -1   14.00   11.20
   5   5  -1   17.10   11.70
  -4  -5   1  130.29   15.40
   4  -5  -1  156.98   22.60
   4   5  -1  109.99   21.00
   3  -5  -1    5.00    9.00
  -3  -5   1    5.20    4.60
   3   5  -1   15.80    9.30
  -2  -5   1  239.68   23.60
  -2   5   1  259.37   24.40
   2   5  -1  292.87   27.10
  -1  -5   1    4.30    4.20
  -1  -5   1   10.20    1.70
  -1   5   1   20.70    5.20
   1   5  -1   10.80    5.50
   0  -5   1  275.97   23.90
   0  -5   1  264.27   24.20
   0   5  -1  284.67   24.70
   0   5   1  294.67   25.30
   1  -5   1    5.30    3.30
  -1  -5  -1    8.90    4.00
   1   5   1    5.30    6.60
   1   5   1    6.50    1.80
  -1   5  -1    4.00    4.70
   2  -5   1   69.99   13.90
  -2  -5  -1   88.79    9.80
   2  -5   1   99.69   10.10
   2   5   1   80.19    8.10
   2   5   1   81.49   14.60
   3  -5   1   18.40   10.10
  -3  -5  -1   10.30    3.80
   3   5   1   12.80    3.40
   3   5   1   14.30   10.50
   4  -5   1  142.49   23.60
  -4  -5  -1  126.19   13.70
   4   5   1  160.28   24.30
  -5  -5  -1  117.49   13.90
   5  -5   1  115.29   22.50
   5   5   1  119.89   24.70
   6  -5   1  392.56   47.40
  -6  -5  -1  323.17   31.60
   6   5   1  346.27   44.40
   7  -5   1  -12.20   11.10
   7   5   1    8.60   16.10
   8  -5   1   -8.90   16.00
   8   5   1    1.10   14.90
   9  -5   1    6.00   16.60
   9   5   1   11.20   18.70
  10  -5   1   -4.30   20.60
  10   5   1   39.90   26.40
  10   6  -1   15.50   21.50
   9  -6  -1   -5.90   17.40
   9   6  -1   15.30   20.50
   8  -6  -1   35.10   18.80
   8   6  -1   -9.30   12.60
  -7  -6   1   94.09   13.90
   7  -6  -1   75.59   21.60
   7   6  -1   59.49   20.70
  -6  -6   1   68.29   11.10
   6  -6  -1   70.89   20.80
   6   6  -1   36.70   16.60
  -5  -6   1    4.20    4.70
   5  -6  -1    1.30   10.40
   5   6  -1   12.30   10.80
  -4  -6   1    4.10    4.50
   4  -6  -1    2.10    9.00
   4   6  -1    1.90    9.40
  -3  -6   1  203.58   19.10
  -3   6   1  193.28   20.20
   3   6  -1  171.08   23.40
  -2  -6   1  249.48   21.10
  -2  -6   1  236.18   23.00
   2   6  -1  240.68   25.90
  -2   6   1  258.27   24.10
  -1  -6   1  726.33   63.29
  -1  -6   1  729.93   61.89
  -1   6   1  766.72   63.89
   1   6  -1  748.03   64.09
   0  -6   1  495.55   43.90
   0  -6   1  531.45   43.40
   0   6  -1  524.65   44.40
   0   6   1  486.75   44.70
  -1  -6  -1  411.86   36.20
   1  -6   1  406.36   35.70
  -1   6  -1  441.46   36.90
   1   6   1  413.86   34.80
   1   6   1  390.16   38.00
  -2  -6  -1  454.35   40.40
   2  -6   1  463.95   40.40
   2   6   1  446.06   44.00
  -2   6  -1  498.45   41.40
   2   6   1  453.75   39.20
  -3  -6  -1   -0.20    3.10
   3  -6   1    4.50    9.20
   3   6   1   11.00    9.90
   3   6   1    3.10    2.60
   4  -6   1  117.29   21.50
  -4  -6  -1  130.29   14.30
   4   6   1  116.19   21.60
  -5  -6  -1   34.80    7.00
   5  -6   1   40.00   15.20
   5   6   1   43.10   16.00
   6  -6   1  138.79   25.10
  -6  -6  -1  110.99   14.40
   6   6   1  106.29   23.30
   7  -6   1   49.70   18.80
   7   6   1   60.19   20.70
   8  -6   1   41.30   19.00
   8   6   1   30.00   20.00
   9  -6   1   35.10   21.00
   9   6   1   13.50   19.90
  10  -6   1   -0.60   18.50
  10   6   1   16.00   20.80
  10   7  -1   79.29   27.80
 -10   7   1   51.29   18.30
   9   7  -1   72.09   27.30
   8  -7  -1  109.59   25.60
   8   7  -1   84.09   25.20
   7  -7  -1   14.70   15.30
  -7  -7   1   39.50    9.00
   7   7  -1   36.20   18.00
   6  -7  -1   13.00   12.60
  -6  -7   1    8.30    5.50
   6   7  -1   27.20   14.60
   5  -7  -1  435.66   44.40
  -5  -7   1  411.46   37.50
   5   7  -1  347.57   45.00
  -4  -7   1  856.11   77.39
  -4   7   1  901.21   78.29
   4   7  -1  941.01   82.19
  -3  -7   1   69.29   10.60
   3   7  -1   90.29   16.70
  -3   7   1  104.49   13.20
  -2  -7   1   80.59   10.10
  -2  -7   1   78.59    6.80
  -2   7   1   64.19   10.50
   2   7  -1   52.89   11.90
  -1  -7   1 1010.90   87.99
  -1  -7   1 1038.90   86.59
   1   7  -1 1059.99   88.89
   0  -7   1 2462.65  203.78
   0  -7   1 2483.55  204.38
   0   7   1 2421.06  205.18
   0   7  -1 2386.66  204.78
   1  -7   1 3148.59  262.97
  -1   7  -1 3109.29  263.87
   1   7   1 3159.38  265.07
   1   7   1 3163.48  262.07
  -2  -7  -1   68.49    9.00
  -2   7  -1   71.89   10.60
   2   7   1   99.79   15.20
   2   7   1   64.69    6.60
   3  -7   1   40.20   12.30
  -3  -7  -1   40.60    6.70
   3   7   1   32.10    4.70
   3   7   1   31.80   12.50
  -4  -7  -1  631.54   56.39
   4  -7   1  676.23   62.99
   4   7   1  650.73   63.19
  -5  -7  -1  280.97   27.30
   5  -7   1  295.77   38.20
   5   7   1  314.17   39.80
   6  -7   1    7.10   12.70
  -6  -7  -1    1.30    4.30
   6   7   1  -11.80   12.20
   7  -7   1   65.99   21.50
   7   7   1   71.69   23.10
   8  -7   1    0.80   14.10
   8   7   1   24.70   18.60
   9  -7   1   72.49   24.80
   9   7   1   55.89   23.00
  10   7   1   70.49   27.80
 -10   8   1   26.10   17.00
  10   8  -1   54.89   26.20
   9   8  -1   29.60   19.20
  -9   8   1    4.00   11.30
   8   8  -1    2.00   16.80
  -7  -8   1  515.45   47.90
   7   8  -1  500.85   61.69
  -6  -8   1  536.25   49.00
   6   8  -1  531.15   57.39
  -5  -8   1    0.20    4.30
   5   8  -1  -10.20    8.20
  -5   8   1    7.70    7.30
  -4  -8   1   61.29    9.40
  -4   8   1   30.30    9.20
   4   8  -1   62.89   15.80
  -3  -8   1    6.80    5.10
   3   8  -1   16.90   10.50
  -3   8   1   11.00    6.30
  -2  -8   1 1014.30   87.59
  -2  -8   1 1031.70   85.49
  -2   8   1  980.50   88.19
   2   8  -1 1072.79   89.79
  -1  -8   1  108.39    9.50
  -1  -8   1  117.19   12.30
  -1   8   1   93.29   12.70
   1   8  -1   93.69   13.00
   0  -8   1    0.80    2.70
   0  -8   1    3.80    3.70
   0   8  -1    4.00    5.00
   0   8   1    1.50    6.20
   1  -8   1   87.09    9.60
  -1   8  -1   89.19   11.60
   1   8   1   80.39    7.60
   1   8   1   91.59   13.90
  -2  -8  -1  742.03   64.59
  -2   8  -1  731.03   65.79
   2   8   1  763.22   62.89
   2   8   1  752.22   67.89
  -3  -8  -1  415.66   39.40
   3   8   1  453.95   37.90
   3   8   1  467.45   45.30
  -3   8  -1  445.76   41.20
  -4  -8  -1   97.59   12.30
   4  -8   1   93.89   19.00
   4   8   1   87.29   19.70
   5  -8   1   11.60   11.80
  -5  -8  -1    8.80    4.70
   5   8   1   -5.10   10.40
  -6  -8  -1   69.19   10.90
   6  -8   1   66.69   20.20
   6   8   1   32.90   17.10
   7  -8   1  672.53   68.79
   7   8   1  590.84   73.49
   8  -8   1   70.09   24.30
   8   8   1   39.10   23.30
   9   8   1   31.80   21.20
 -10   8  -1   -2.10   11.80
  10   8   1   18.80   21.30
  10   9  -1   33.30   23.50
 -10   9   1   34.20   16.10
   9   9  -1  151.18   33.20
  -9   9   1  110.79   23.90
   8   9  -1   14.10   18.10
  -8   9   1   -1.80    9.80
  -7  -9   1   11.70    6.70
   7   9  -1   20.20   17.30
  -7   9   1    5.20    8.20
  -6  -9   1   26.50    7.60
   6   9  -1   30.70   15.10
  -6   9   1   24.50   10.00
  -5  -9   1  157.28   19.40
   5   9  -1  189.18   28.30
  -5   9   1  167.68   22.50
  -4  -9   1  790.12   67.39
  -4   9   1  727.63   68.69
   4   9  -1  775.52   71.69
  -3  -9   1   39.00    7.30
  -3  -9   1   28.90    3.50
   3   9  -1   34.30   11.10
  -3   9   1   29.80    8.80
  -2  -9   1   68.09   10.50
  -2  -9   1   88.99    7.80
  -2   9   1   85.99   12.20
   2   9  -1   97.19   14.90
  -1  -9   1    5.10    1.90
  -1  -9   1    8.30    5.20
  -1   9   1   12.80    6.00
   1   9  -1    1.80    5.80
   0  -9   1 2140.49  178.28
   0  -9   1 2128.29  177.48
   0   9  -1 2150.78  178.88
   0   9   1 2060.79  179.28
   1  -9   1   36.30    5.90
   1   9   1   36.60    3.90
   1   9   1   18.40    9.00
  -1   9  -1   35.10    8.10
  -2  -9  -1  100.69   11.30
  -2   9  -1   99.39   13.10
   2   9   1   67.09   14.40
   2   9   1   84.59    7.90
  -3  -9  -1  295.57   25.90
   3   9   1  260.97   23.60
   3   9   1  282.67   33.30
  -3   9  -1  279.07   27.80
  -4  -9  -1  584.04   52.09
  -4   9  -1  593.54   53.89
  -5  -9  -1  541.35   49.50
   5   9   1  576.24   57.39
   6  -9   1   41.50   16.90
  -6  -9  -1   36.70    8.10
   6   9   1   10.60   13.70
   7  -9   1   86.09   21.90
   7   9   1   46.60   20.80
   8   9   1   -8.70   17.10
   9   9   1   78.99   26.70
  -9   9  -1  122.39   22.50
  10   9   1   57.99   25.80
 -10   9  -1   41.10   17.30
  10  10  -1   37.40   21.60
 -10  10   1   -5.40   11.40
  -9  10   1   -1.50   11.10
   9  10  -1    6.80   18.60
   8  10  -1  -12.30   14.20
  -8  10   1    1.10    9.10
  -7 -10   1   39.60    9.40
   7  10  -1   -1.20   13.80
  -7  10   1   27.00   12.00
  -6 -10   1   66.09   12.00
  -6  10   1   78.69   15.10
   6  10  -1   57.09   18.30
  -5 -10   1  193.98   21.00
   5  10  -1  201.98   29.50
  -5  10   1  199.18   25.70
  -4 -10   1   88.49   11.80
   4  10  -1   77.49   16.10
  -4  10   1   47.70   11.10
  -3 -10   1   16.20    6.60
  -3 -10   1   31.60    3.30
  -3  10   1   32.40    9.10
   3  10  -1   48.10   12.90
  -2 -10   1  316.67   27.40
   2  10  -1  272.27   29.10
  -2  10   1  269.07   27.70
  -1 -10   1   91.79   11.50
  -1 -10   1   98.39    8.80
   1  10  -1   90.79   13.00
  -1  10   1   79.79   12.00
   0 -10   1   30.20    4.40
   0 -10   1   25.00    5.50
   0  10   1   27.40    7.80
   0  10  -1   17.90    6.90
  -1  10  -1  361.16   34.10
   1  10   1  365.76   31.40
   1  10   1  404.66   36.00
  -2 -10  -1   20.30    5.90
   2  10   1    5.50    9.10
   2  10   1   16.40    2.30
  -2  10  -1   12.90    6.70
  -3 -10  -1  304.77   30.00
  -3  10  -1  322.87   32.10
   3  10   1  369.46   35.80
  -4 -10  -1   35.20    7.40
  -4  10  -1   21.90    9.40
   4  10   1   50.49   16.10
  -5 -10  -1   93.79   13.00
  -5  10  -1   68.99   14.00
   5  10   1  105.39   21.20
  -6 -10  -1  189.38   21.20
  -6  10  -1  194.48   24.20
   6  10   1  117.99   28.30
   7  10   1    9.50   14.50
  -7  10  -1    6.30    8.10
   8  10   1   -9.40   15.90
  -8  10  -1   -0.50    8.50
  -9  10  -1   -3.00    9.70
   9  10   1   -5.80   18.40
 -10  10  -1   16.80   13.60
  10  10   1    7.70   21.20
  10  11  -1  -11.60   19.40
 -10  11   1   -2.40   11.70
   9  11  -1   36.30   20.80
  -9  11   1   35.00   16.10
   8  11  -1   31.70   19.20
  -8  11   1   54.19   17.10
  -7 -11   1    3.10    6.20
  -7  11   1   -4.60    9.50
   7  11  -1   21.80   15.50
  -6 -11   1    4.30    5.70
  -6  11   1    0.00    8.10
   6  11  -1  -24.70   10.30
  -5 -11   1  347.77   31.80
   5  11  -1  306.07   39.60
  -5  11   1  300.77   33.30
  -4 -11   1    2.00    5.00
  -4  11   1   14.10    8.00
   4  11  -1   -4.20    9.80
  -3 -11   1   83.99    7.10
  -3 -11   1   83.29   12.10
  -3  11   1   54.19   11.80
   3  11  -1   84.19   16.30
  -2 -11   1   16.70    6.10
   2  11  -1   19.20    8.50
  -2  11   1   13.60    6.50
  -1 -11   1   55.09    5.70
  -1 -11   1   42.60    8.40
  -1  11   1   49.20    9.10
   1  11  -1   56.09   10.90
   0 -11   1    3.90    3.00
   0 -11   1    2.40    4.70
   0  11  -1    5.90    5.80
   0  11   1    9.20    6.60
   1  11   1  187.78   22.30
  -1  11  -1  186.38   19.70
   1  11   1  179.68   15.80
  -2 -11  -1   11.40    5.00
  -2  11  -1   10.40    6.50
   2  11   1   21.40    9.70
   2  11   1    9.20    1.70
  -3 -11  -1    5.30    5.00
  -3  11  -1    9.40    7.40
   3  11   1    1.50   10.10
  -4 -11  -1   51.59    9.00
   4  11   1   58.39   16.40
  -4  11  -1   59.19   12.00
  -5 -11  -1  112.79   15.40
   5  11   1  101.19   23.30
  -5  11  -1  124.79   19.70
  -6 -11  -1  210.78   23.10
  -6  11  -1  162.18   24.60
   6  11   1  183.68   31.80
  -7  11  -1   -2.10    8.80
   7  11   1    6.20   15.30
   8  11   1  -10.90   14.20
  -8  11  -1   17.50   12.40
   9  11   1   -0.80   18.20
  -9  11  -1    2.20   10.80
 -10  11  -1    5.30   13.20
  10  11   1  -13.80   18.80
  10  12  -1  -21.40   19.00
 -10  12   1   13.80   13.90
   9  12  -1    5.20   20.60
  -9  12   1   -8.30   10.80
   8  12  -1   32.40   19.60
  -8  12   1   29.00   13.30
  -7 -12   1  108.29   16.30
  -7  12   1   94.79   18.80
   7  12  -1   72.29   23.10
  -6 -12   1   68.99   12.10
  -6  12   1   44.90   13.00
   6  12  -1   63.99   18.50
  -5 -12   1  135.59   17.70
  -5  12   1   99.79   18.50
   5  12  -1  163.78   25.20
  -4 -12   1   41.10    4.10
  -4 -12   1   22.70    7.30
   4  12  -1   37.80   13.00
  -4  12   1   35.60   10.70
  -3 -12   1  201.08   22.40
  -3  12   1  243.38   25.90
   3  12  -1  244.38   29.00
  -2 -12   1  207.38   19.70
   2  12  -1  168.98   22.50
  -2  12   1  184.78   20.40
  -1 -12   1  147.69   16.60
   1  12  -1  137.79   17.90
  -1  12   1  145.19   17.40
   0 -12   1  378.86   34.40
   0  12   1  363.16   35.90
   0  12  -1  396.16   35.50
   1  12   1 1254.77  105.09
  -1  12  -1 1292.17  107.99
   1  12   1 1210.48  108.99
  -2 -12  -1  599.24   49.99
   2  12   1  559.04   46.90
  -2  12  -1  502.15   50.39
   2  12   1  581.84   53.09
  -3 -12  -1  346.17   34.20
  -3  12  -1  365.36   35.90
   3  12   1  433.86   40.80
  -4 -12  -1    4.50    5.00
  -4  12  -1   -1.60    6.40
   4  12   1    3.00   10.90
  -5 -12  -1   12.90    6.50
   5  12   1    4.30   12.10
  -5  12  -1   29.80   10.60
  -6 -12  -1  259.97   25.70
  -6  12  -1  244.08   31.60
   6  12   1  201.28   35.00
  -7  12  -1  101.39   19.70
   7  12   1   68.49   25.40
   8  12   1   19.90   20.40
  -8  12  -1    3.70   11.10
   9  12   1  -13.40   17.60
  -9  12  -1    3.00   11.40
  10  12   1  -11.80   20.10
 -10  12  -1    8.60   15.20
  10  13  -1   37.40   24.30
 -10  13   1   91.39   22.40
  -9  13   1   87.09   21.20
   9  13  -1   31.60   23.20
   8  13  -1   53.79   23.10
  -8  13   1   68.09   17.40
  -7 -13   1    8.60    7.00
   7  13  -1    9.50   16.20
  -7  13   1   12.00    9.20
  -6 -13   1   82.39   13.90
  -6  13   1   74.89   15.70
   6  13  -1   86.29   22.70
  -5 -13   1  919.01   77.59
   5  13  -1  804.62   82.69
  -5  13   1  867.01   79.49
  -4 -13   1   47.00    9.70
  -4  13   1   56.39   12.00
   4  13  -1   61.69   16.10
  -3 -13   1   33.30    7.90
  -3  13   1   32.20    9.50
   3  13  -1   44.70   13.10
  -2 -13   1   35.20    8.00
   2  13  -1   35.00   11.30
  -2  13   1   26.90    8.00
  -1 -13   1  249.38   23.00
   1  13  -1  240.58   24.80
  -1  13   1  203.08   23.30
   0 -13   1  880.81   79.69
   0  13  -1  937.31   80.79
   0  13   1  974.90   81.69
   1  13   1   47.10    5.20
  -1  13  -1   40.60    9.00
   1  13   1   44.20   11.10
  -2 -13  -1    0.20    5.10
  -2  13  -1   -5.60    6.10
   2  13   1   -4.40    8.00
   2  13   1    2.80    1.30
  -3 -13  -1   11.70    5.60
   3  13   1   14.80   11.00
  -3  13  -1   20.20    9.20
  -4 -13  -1  270.57   25.80
   4  13   1  221.58   33.70
  -4  13  -1  246.18   29.50
  -5 -13  -1  577.44   53.09
   5  13   1  621.84   61.19
  -5  13  -1  565.14   55.79
  -6 -13  -1  187.28   22.00
   6  13   1  144.39   28.40
  -6  13  -1  167.58   25.10
  -7  13  -1  -12.20    8.00
   7  13   1   12.10   16.70
   8  13   1   37.30   20.70
  -8  13  -1   49.90   16.30
   9  13   1  119.69   33.90
  -9  13  -1  109.19   23.10
  10  13   1   67.79   29.50
 -10  13  -1   80.49   22.30
  10  14  -1    2.30   17.40
 -10  14   1    7.00   10.80
   9  14  -1   -4.10   17.10
  -9  14   1  -14.20    9.00
  -8  14   1    3.10   10.10
   8  14  -1   -4.60   16.20
  -7 -14   1   66.69   14.00
  -7  14   1   91.09   18.70
   7  14  -1  117.39   25.40
  -6 -14   1  268.37   26.80
   6  14  -1  305.87   39.70
  -6  14   1  189.48   29.40
  -5 -14   1   -3.20    5.50
   5  14  -1   25.40   14.00
  -5  14   1   10.90    8.60
  -4 -14   1   19.40    6.80
  -4  14   1   18.70    8.20
   4  14  -1   18.30   11.40
  -3 -14   1  164.98   19.70
   3  14  -1  194.68   24.90
  -3  14   1  158.78   20.80
  -2 -14   1  175.28   20.50
  -2  14   1  193.18   22.60
   2  14  -1  186.78   23.80
  -1 -14   1  356.06   32.40
  -1  14   1  332.37   33.20
   1  14  -1  350.66   34.30
   0 -14   1  132.89   15.50
   0  14   1  113.49   17.20
   0  14  -1  147.79   17.30
   1  14   1  513.25   48.30
  -1  14  -1  506.85   46.50
  -2 -14  -1  430.96   41.80
   2  14   1  457.05   38.50
   2  14   1  446.26   45.10
  -2  14  -1  506.05   43.40
  -3 -14  -1  989.00   85.69
  -3  14  -1  990.70   87.29
   3  14   1  966.10   89.99
  -4 -14  -1   24.10    7.70
  -4  14  -1   17.60    9.00
   4  14   1   18.20   11.90
  -5 -14  -1   13.30    6.80
  -5  14  -1    2.70    8.10
   5  14   1   14.80   14.30
  -6 -14  -1   19.50    8.60
   6  14   1   50.69   18.60
  -6  14  -1   38.60   12.70
   7  14   1  146.59   30.70
  -7  14  -1  167.68   26.80
   8  14   1   94.49   27.10
  -8  14  -1   20.40   11.90
  -9  14  -1  -24.70    7.60
   9  14   1  -19.90   18.30
 -10  14  -1  -11.40    9.80
  10  14   1  -10.10   20.10
  10  15  -1  -14.40   16.00
 -10  15   1   -6.30   10.60
   9  15  -1   48.20   23.90
  -9  15   1   34.10   14.90
   8  15  -1  -13.70   15.50
  -8  15   1   -4.00    9.60
  -7 -15   1   -1.30    6.70
   7  15  -1  -15.00   10.90
  -7  15   1    0.30    8.70
  -6 -15   1  159.48   19.90
   6  15  -1  123.19   26.00
  -6  15   1  105.79   20.10
  -5 -15   1  164.28   21.90
   5  15  -1  184.88   30.20
  -5  15   1  225.28   27.10
  -4 -15   1  140.59   18.50
  -4  15   1  146.69   20.10
   4  15  -1  124.09   23.00
  -3 -15   1   62.09   11.50
  -3  15   1   66.49   12.80
   3  15  -1   63.09   15.20
  -2 -15   1   20.50    6.80
   2  15  -1   16.80    8.80
  -2  15   1    6.50    7.60
  -1 -15   1   15.60    5.90
  -1  15   1    9.20    7.30
   1  15  -1    7.60    8.10
   0 -15   1  160.18   17.10
   0  15  -1  172.08   20.30
   0  15   1  148.59   20.10
   1  15   1    9.20    8.70
  -1  15  -1   13.90    6.80
  -2 -15  -1   52.79    9.20
  -2  15  -1   41.60    9.70
   2  15   1   40.00    4.00
   2  15   1   18.40   11.30
  -3 -15  -1   -3.50    5.00
   3  15   1   14.40   10.90
  -3  15  -1    1.70    7.40
  -4 -15  -1   69.69   11.80
   4  15   1   66.89   17.30
  -4  15  -1   81.39   14.80
  -5 -15  -1  259.77   25.50
   5  15   1  238.18   35.90
  -5  15  -1  203.68   28.40
  -6 -15  -1    1.40    6.10
   6  15   1    1.90   12.50
  -6  15  -1   14.50   10.20
  -7  15  -1   -1.00    8.20
   7  15   1   22.20   18.60
  -8  15  -1    2.50    9.80
   8  15   1   -3.80   15.80
   9  15   1    0.40   16.50
  -9  15  -1  -13.10    9.00
 -10  15  -1   32.10   16.70
  10  15   1   44.90   28.10
  10  16  -1   -9.60   17.70
 -10  16   1    9.40   14.10
  -9  16   1    8.70   12.80
   9  16  -1  -16.10   16.30
   8  16  -1   33.60   20.10
  -8  16   1   14.60   12.10
  -7 -16   1   14.60    8.20
   7  16  -1  -22.20   12.80
  -7  16   1   13.40   11.60
  -6 -16   1   86.59   15.30
   6  16  -1  101.49   25.10
  -6  16   1   97.99   19.20
  -5 -16   1    6.40    6.20
   5  16  -1   22.90   15.20
  -5  16   1   13.10    9.40
  -4 -16   1  154.48   20.80
  -4  16   1  220.38   25.60
   4  16  -1  176.58   27.80
  -3 -16   1    8.00    6.10
  -3  16   1   13.30    8.40
   3  16  -1    4.10   10.20
  -2 -16   1  125.59   15.70
  -2  16   1  100.99   15.80
   2  16  -1  123.09   18.70
  -1 -16   1   93.79   12.90
  -1  16   1   94.69   14.30
   1  16  -1   83.09   14.90
   0 -16   1   55.69    9.80
   0  16   1   89.29   14.60
   0  16  -1   52.79   11.90
   1  16   1   19.00    9.20
  -1  16  -1   -9.80    6.10
  -2 -16  -1   35.20    8.20
  -2  16  -1   39.20   10.20
   2  16   1   28.70    3.20
   2  16   1   19.00   10.80
  -3 -16  -1   16.70    7.30
   3  16   1   20.40   13.30
  -3  16  -1   40.50   10.00
  -4 -16  -1   51.49   10.50
  -4  16  -1   49.10   13.00
   4  16   1   97.69   19.00
  -5 -16  -1    8.00    6.70
  -5  16  -1   -9.60    6.30
   5  16   1    6.90   13.90
  -6 -16  -1   42.80   10.40
  -6  16  -1   13.20   11.40
   6  16   1   22.00   18.00
   7  16   1   13.70   15.20
  -7  16  -1    1.50    9.60
   8  16   1   33.90   20.80
  -8  16  -1   27.10   14.10
   9  16   1    7.10   18.40
  -9  16  -1   -5.30   10.00
  10  16   1   -0.80   21.40
 -10  16  -1    5.10   20.20
  10  17  -1  -17.50   16.20
 -10  17   1   -4.90   12.40
  -9  17   1  -12.20    9.80
   9  17  -1  -12.30   17.30
   8  17  -1   19.10   20.00
  -8  17   1   35.50   13.50
  -7 -17   1   -0.60    6.80
   7  17  -1   -0.30   13.80
  -7  17   1    8.10   10.50
  -6 -17   1   10.40    7.70
  -6  17   1    8.90    8.90
   6  17  -1   -0.60   13.50
  -5 -17   1  314.27   31.40
   5  17  -1  319.97   41.30
  -5  17   1  266.37   34.70
  -4 -17   1   62.09   11.70
   4  17  -1   74.99   18.70
  -4  17   1   59.29   14.10
  -3 -17   1   65.79   11.90
   3  17  -1   52.49   14.20
  -3  17   1   61.59   13.30
  -2 -17   1   72.19   12.70
   2  17  -1   86.39   15.60
  -2  17   1   83.79   14.20
  -1 -17   1    5.10    5.40
   1  17  -1    3.30    7.50
  -1  17   1   -6.40    6.60
   0 -17   1  266.57   26.20
   0  17  -1  249.18   27.40
   0  17   1  277.07   28.60
   1  17   1  136.09   20.10
  -1  17  -1  126.69   18.20
  -2  17  -1  152.18   20.60
   2  17   1  145.19   12.60
   2  17   1  134.99   22.00
  -3 -17  -1  109.19   15.30
  -3  17  -1   93.49   15.90
   3  17   1   91.09   19.10
  -4 -17  -1   19.10    7.40
   4  17   1    4.80   12.70
  -4  17  -1    5.10    8.00
  -5 -17  -1  164.38   20.90
   5  17   1  136.49   26.90
  -5  17  -1  146.59   22.50
  -6 -17  -1  273.27   30.70
  -6  17  -1  306.87   36.00
   6  17   1  203.28   36.80
  -7  17  -1    0.70    9.50
   7  17   1  -13.60   13.30
   8  17   1   35.60   22.50
  -8  17  -1   10.20   12.00
  -9  17  -1  -14.20    8.80
   9  17   1    4.70   19.80
 -10  18   1   25.80   14.10
  10  18  -1   -0.30   19.60
  -9  18   1   -5.70   10.40
   9  18  -1   45.80   23.10
  -8  18   1   76.29   18.80
   8  18  -1   44.00   23.00
  -7 -18   1   59.29   13.90
  -7  18   1   76.29   17.10
   7  18  -1   67.29   23.20
  -6 -18   1   30.50    9.30
  -6  18   1    3.60    9.00
   6  18  -1   13.40   15.00
  -5 -18   1  232.38   26.30
   5  18  -1  229.98   33.20
  -5  18   1  175.98   26.50
  -4 -18   1  170.68   21.50
   4  18  -1  160.28   26.10
  -4  18   1  171.68   23.60
  -3 -18   1  212.18   24.20
   3  18  -1  196.38   28.00
  -3  18   1  176.18   24.10
  -2 -18   1  468.15   44.10
   2  18  -1  487.65   47.30
  -2  18   1  467.45   45.20
  -1 -18   1  227.48   24.00
   1  18  -1  186.28   24.90
  -1  18   1  205.28   25.40
   0  18   1   64.09   13.50
   0  18  -1   77.69   14.40
   1  18   1   72.99   15.90
  -1  18  -1   59.79   12.70
  -2  18  -1  485.65   46.30
   2  18   1  472.45   40.80
   2  18   1  551.94   49.99
  -3 -18  -1  288.37   28.60
   3  18   1  325.37   38.10
  -3  18  -1  237.98   31.00
  -4 -18  -1  212.48   24.60
  -4  18  -1  185.28   25.60
   4  18   1  193.38   29.80
  -5 -18  -1    8.20    7.50
   5  18   1   12.00   14.60
  -5  18  -1   12.00    9.40
  -6 -18  -1   73.69   14.00
  -6  18  -1   68.19   16.40
   6  18   1   70.29   22.90
   7  18   1   17.60   17.40
  -7  18  -1   19.00   11.10
   8  18   1   17.20   20.20
  -8  18  -1   53.49   16.80
   9  18   1  -21.60   15.50
  -9  18  -1   18.90   13.30
   9  19  -1  -10.60   17.80
  -9  19   1   -5.70   10.70
   8  19  -1   69.89   25.30
  -8  19   1   86.89   19.20
  -7 -19   1   14.40    8.80
  -7  19   1   11.50   10.50
   7  19  -1   -3.00   16.30
  -6 -19   1   48.70   12.50
   6  19  -1   53.89   20.30
  -6  19   1   93.09   18.50
  -5 -19   1  175.18   20.90
  -5  19   1  114.09   20.60
   5  19  -1   99.39   24.20
  -4 -19   1  120.59   17.60
   4  19  -1  126.49   24.30
  -4  19   1  126.59   19.30
  -3 -19   1  345.27   36.10
   3  19  -1  418.06   41.30
  -3  19   1  371.36   37.60
  -2 -19   1   16.90    7.60
   2  19  -1   41.10   13.30
  -2  19   1   43.70   10.60
  -1 -19   1  529.15   52.59
   1  19  -1  613.74   55.19
  -1  19   1  624.34   55.19
   0  19  -1  500.15   46.40
   0  19   1  469.05   46.90
   1  19   1  566.64   55.89
  -1  19  -1  598.84   54.49
   2  19   1  260.77   22.40
  -2  19  -1  269.47   28.10
   2  19   1  260.97   32.80
  -3 -19  -1  174.78   21.40
   3  19   1  143.49   25.60
  -3  19  -1  152.38   21.50
  -4 -19  -1  136.39   18.20
  -4  19  -1   96.89   17.80
   4  19   1   90.19   22.40
  -5 -19  -1  182.78   23.20
  -5  19  -1  185.48   25.20
   5  19   1  120.49   26.80
  -6 -19  -1   45.40   12.10
  -6  19  -1   47.70   14.60
   6  19   1   81.19   22.90
  -7  19  -1   17.60   11.80
   7  19   1   -2.50   13.60
   8  19   1  -13.00   16.90
  -8  19  -1   11.30   11.70
  -9  19  -1    9.40   12.00
   9  19   1   -5.40   19.10
   9  20  -1   18.70   21.60
  -9  20   1   -4.10   10.60
   8  20  -1   28.20   19.70
  -8  20   1   21.80   12.70
  -7 -20   1   28.30   10.90
   7  20  -1   14.30   15.20
  -7  20   1   32.70   14.30
  -6 -20   1   51.49   12.20
  -6  20   1   33.60   12.80
   6  20  -1   82.09   22.40
  -5 -20   1   72.69   14.00
   5  20  -1   37.00   16.80
  -5  20   1   61.79   14.50
  -4 -20   1   18.60    7.60
  -4  20   1   38.90   11.50
   4  20  -1   -0.40   11.40
  -3 -20   1  159.88   20.90
  -3  20   1  149.88   21.70
   3  20  -1  197.98   27.10
  -2 -20   1   43.60   10.00
   2  20  -1   52.19   14.20
  -2  20   1   55.59   12.80
  -1 -20   1   21.00    8.70
   1  20  -1   27.80   10.40
  -1  20   1   40.00   11.20
   0  20  -1   29.40   10.50
   0  20   1   30.90   11.80
   1  20   1   30.50   12.20
  -1  20  -1   18.40    8.60
  -2  20  -1   44.70   11.60
   2  20   1   46.60   14.30
  -3 -20  -1    0.70    6.40
  -3  20  -1   14.70    8.60
   3  20   1   21.60   12.10
  -4 -20  -1  117.79   19.10
   4  20   1  150.78   27.50
  -4  20  -1  163.48   23.20
  -5 -20  -1   10.70    8.10
   5  20   1  -10.60   11.20
  -5  20  -1    5.80    9.70
  -6 -20  -1    1.10    8.40
   6  20   1    3.80   15.20
  -6  20  -1   22.80   11.30
  -7  20  -1   12.80   11.30
   7  20   1   -4.00   13.90
  -8  20  -1   26.20   13.60
   8  20   1   33.60   21.00
  -9  20  -1   13.50   12.90
   9  20   1   -2.90   21.60
  -9  21   1  -16.30    7.60
   9  21  -1   19.60   21.10
  -8  21   1   -6.70    8.90
   8  21  -1    8.60   17.20
  -7 -21   1   30.80   11.20
  -7  21   1   23.60   12.40
   7  21  -1   -5.50   14.30
  -6 -21   1   25.10    9.40
   6  21  -1   14.50   17.30
  -6  21   1   19.80   11.00
  -5 -21   1    0.50    7.50
  -5  21   1   13.50    9.70
   5  21  -1   -5.30   11.70
  -4 -21   1   -1.90    7.30
  -4  21   1    9.40    8.70
   4  21  -1   11.20   12.80
  -3 -21   1    8.30    6.80
   3  21  -1    5.00    9.90
  -3  21   1   13.50    8.40
  -2 -21   1   46.50   10.80
   2  21  -1   48.60   14.50
  -2  21   1   38.10   10.80
  -1 -21   1   12.90    7.50
  -1  21   1   -2.50    8.30
   1  21  -1  -12.80    8.00
   0  21  -1    5.30    7.80
   0  21   1   -6.20    8.80
  -1  21  -1   67.89   13.80
   1  21   1   68.49   16.50
  -2  21  -1  102.69   16.90
   2  21   1   88.09   19.30
  -3 -21  -1   -5.60    4.90
  -3  21  -1   -5.20    7.40
   3  21   1   -2.70   10.60
  -4 -21  -1    4.30    7.40
   4  21   1   30.40   16.30
  -4  21  -1   -2.10    7.30
  -5 -21  -1    6.90    7.70
   5  21   1  -11.90   11.30
  -5  21  -1   -5.00    7.50
  -6 -21  -1    4.20    8.50
  -6  21  -1    3.80   10.30
   6  21   1    5.80   17.00
  -7 -21  -1  -17.20    7.50
   7  21   1   21.60   17.70
  -7  21  -1    9.30    9.80
  -8  21  -1    7.60   10.60
   8  21   1    0.30   15.90
  -9  21  -1   37.40   16.50
   9  21   1   49.99   26.40
   9  22  -1   -2.00   20.50
  -9  22   1   12.90   12.80
   8  22  -1    3.80   19.00
  -8  22   1   -7.30    9.20
  -7 -22   1   12.70    9.10
  -7  22   1    4.30   10.20
   7  22  -1   -8.50   14.30
  -6 -22   1   39.50   11.60
   6  22  -1   43.20   20.90
  -6  22   1    7.00   11.30
  -5 -22   1   17.50    9.00
   5  22  -1   44.00   17.70
  -5  22   1   21.00   10.70
  -4 -22   1   -4.50    6.80
  -4  22   1   -8.10    6.30
   4  22  -1  -28.50   10.20
  -3 -22   1   21.30    8.40
  -3  22   1   35.00   10.90
   3  22  -1   12.10   12.00
  -2 -22   1  245.58   25.10
  -2  22   1  201.88   27.30
   2  22  -1  226.08   30.00
  -1 -22   1  107.19   17.70
  -1  22   1  162.58   22.10
   1  22  -1  167.98   22.80
   0  22   1  148.19   22.00
   0  22  -1  104.39   18.70
  -1  22  -1   67.69   14.00
   1  22   1   90.49   18.10
   2  22   1  178.08   27.10
  -2  22  -1  192.98   24.70
  -3  22  -1  129.99   20.10
   3  22   1  116.69   23.10
  -4 -22  -1   13.00    8.90
   4  22   1   30.10   15.00
  -4  22  -1   29.20   11.50
  -5 -22  -1    5.50    8.10
   5  22   1   13.20   14.50
  -5  22  -1    2.30   10.30
  -6 -22  -1   24.40   10.40
   6  22   1   21.70   18.60
  -6  22  -1    6.30   10.50
  -7 -22  -1   71.09   15.00
   7  22   1   51.19   23.80
  -7  22  -1   36.60   14.90
   8  22   1    6.20   17.10
  -8  22  -1   31.60   13.60
   9  22   1   20.10   21.20
  -9  22  -1   -7.80    9.60
   9  23  -1  -11.80   16.60
  -9  23   1   60.59   19.20
  -8 -23   1   59.09   17.30
  -8  23   1   76.09   18.80
   8  23  -1   56.99   26.00
  -7 -23   1    7.00    9.10
   7  23  -1  -17.50   14.60
  -7  23   1    3.10    9.80
  -6 -23   1   24.70   11.30
  -6  23   1   23.50   11.80
   6  23  -1   19.90   16.30
  -5 -23   1  252.87   31.30
  -5  23   1  243.48   32.50
   5  23  -1  246.58   37.60
  -4 -23   1  538.05   47.50
  -4  23   1  441.26   48.00
   4  23  -1  429.86   54.09
  -3 -23   1   49.30   11.40
   3  23  -1   33.40   15.20
  -3  23   1   57.39   14.20
  -2 -23   1   -1.20    6.20
   2  23  -1   10.20   11.40
  -2  23   1    1.80    8.00
  -1 -23   1  506.75   47.30
   1  23  -1  452.05   49.10
  -1  23   1  544.75   50.19
   0  23   1  275.97   32.90
   0  23  -1  222.68   29.50
   1  23   1  566.24   53.49
  -1  23  -1  486.45   50.19
  -2  23  -1   44.70   12.00
   2  23   1   25.40   13.00
   3  23   1   77.09   20.50
  -3  23  -1   75.99   15.50
  -4 -23  -1  105.79   17.00
  -4  23  -1   85.49   17.20
   4  23   1   65.19   21.40
  -5 -23  -1   22.30   11.20
  -5  23  -1   42.10   13.20
   5  23   1   34.50   19.00
  -6 -23  -1   93.09   16.90
  -6  23  -1   62.29   16.30
   6  23   1   68.29   23.00
  -7 -23  -1   11.70    9.10
   7  23   1   10.80   18.20
  -7  23  -1    1.50    9.70
   8  23   1   95.89   29.30
  -8  23  -1   60.69   17.90
   9  23   1   42.90   25.00
  -9  23  -1   40.60   16.60
   9  24  -1   30.50   23.70
  -9  24   1   14.50   13.30
  -8 -24   1   23.60   12.20
   8  24  -1   16.40   18.10
  -8  24   1   16.60   13.00
  -7 -24   1   29.40   11.60
   7  24  -1   19.20   19.60
  -7  24   1   49.00   15.80
  -6 -24   1   77.09   17.10
  -6  24   1  146.79   23.90
   6  24  -1   98.69   26.10
  -5 -24   1  119.79   19.00
  -5  24   1  118.99   21.70
   5  24  -1  113.99   26.90
  -4 -24   1   51.99   12.70
   4  24  -1   58.79   19.30
  -4  24   1   52.39   14.40
  -3 -24   1  124.69   19.20
  -3  24   1  109.49   19.10
   3  24  -1  130.89   23.80
  -2 -24   1  212.08   23.80
   2  24  -1  135.59   23.40
  -2  24   1  130.79   21.50
  -1  24   1  438.76   44.50
   1  24  -1  438.56   45.70
   0  24  -1   -3.00    8.80
   0  24   1  -15.20    7.70
  -1  24  -1   32.30   12.00
   1  24   1   22.20   12.60
   2  24   1  317.57   41.70
  -2  24  -1  336.97   38.40
   3  24   1  243.28   34.80
  -3  24  -1  189.98   27.50
   4  24   1    9.90   14.10
  -4  24  -1   10.70   11.20
  -5 -24  -1   -4.40    7.90
   5  24   1   -9.30   13.30
  -5  24  -1   12.00    9.80
  -6 -24  -1   77.79   17.00
  -6  24  -1   94.69   19.40
   6  24   1  137.29   28.20
  -7 -24  -1  141.39   21.20
  -7  24  -1   64.99   18.70
   7  24   1   84.29   25.10
  -8  24  -1   28.40   14.30
   8  24   1   -2.20   16.40
   9  24   1  -14.30   17.20
  -9  24  -1    5.90   13.10
   9  25  -1   31.80   23.30
  -9  25   1   33.20   15.90
  -8 -25   1   29.70   12.70
  -8  25   1   36.30   16.00
   8  25  -1   45.40   24.80
  -7 -25   1    5.60    8.70
   7  25  -1   10.40   17.30
  -7  25   1    5.40    9.50
  -6 -25   1    4.80    8.90
  -6  25   1   29.10   13.50
   6  25  -1    2.80   14.60
  -5 -25   1  125.79   20.10
  -5  25   1  113.39   21.90
   5  25  -1  100.09   24.00
  -4 -25   1  117.89   19.20
   4  25  -1  104.59   23.80
  -4  25   1   80.59   17.90
  -3 -25   1   60.49   14.30
   3  25  -1   45.80   17.00
  -3  25   1   74.89   15.20
  -2 -25   1   -3.30    6.40
   2  25  -1   -9.80    9.10
  -2  25   1    8.30    8.10
  -1  25   1   42.90   13.10
   1  25  -1   74.19   16.10
   0  25   1  124.79   23.60
   0  25  -1  168.68   23.90
  -1  25  -1  140.79   21.00
   1  25   1  115.19   21.90
   2  25   1  125.09   22.80
  -2  25  -1   88.89   17.60
   3  25   1   -5.70   13.00
  -3  25  -1    1.50    9.30
  -4  25  -1    7.40   10.70
   4  25   1   34.40   18.30
  -5 -25  -1   35.60   11.50
   5  25   1   94.79   25.00
  -5  25  -1   41.50   15.30
  -6 -25  -1   43.90   12.60
  -6  25  -1   41.10   14.90
   6  25   1   29.20   20.70
  -7 -25  -1   20.50   10.90
  -7  25  -1  -11.20    9.30
   7  25   1    2.80   16.50
   8  25   1   -1.80   20.10
  -8  25  -1   11.10   12.90
   9  26  -1   21.90   22.80
  -8 -26   1   -9.70    8.00
   8  26  -1   -5.70   16.60
  -8  26   1    5.50   11.40
  -7 -26   1    1.90    9.90
   7  26  -1    7.00   17.90
  -7  26   1   -1.90   11.10
  -6 -26   1   13.60   10.30
  -6  26   1   12.30   11.00
   6  26  -1   14.50   17.80
  -5 -26   1   -0.60    8.80
   5  26  -1   14.40   16.20
  -5  26   1    3.50    9.60
  -4 -26   1   43.90   11.80
   4  26  -1   22.50   15.00
  -4  26   1   19.80   11.00
  -3 -26   1   52.89   12.30
   3  26  -1   10.20   13.40
  -3  26   1   41.90   13.30
  -2 -26   1   18.70    9.20
   2  26  -1    6.80   12.20
  -2  26   1   -3.10    8.80
  -1  26   1   43.70   13.60
   1  26  -1   34.50   14.10
   0  26   1   37.20   14.50
   0  26  -1   39.60   13.00
   1  26   1  -17.90    8.00
  -1  26  -1   -6.70    7.20
  -2  26  -1    8.40    9.00
   2  26   1  -11.50   10.50
   3  26   1    6.90   13.60
  -3  26  -1   -1.20    9.20
   4  26   1  -19.50   12.70
  -4  26  -1   -9.20    9.10
   5  26   1  -10.40   11.80
  -5  26  -1   -5.30    9.00
   6  26   1   -8.40   14.30
  -6  26  -1  -11.60    9.80
   7  26   1    2.60   15.60
  -7  26  -1   -0.20    9.40
  -8  26  -1   15.10   13.20
   8  26   1    8.50   18.50
  -8 -27   1   -0.60    9.10
   8  27  -1  -11.50   17.90
  -8  27   1  -15.10    9.80
  -7 -27   1   10.70    9.50
  -7  27   1   -8.90    9.40
   7  27  -1    7.50   15.30
  -6 -27   1   15.80    9.30
  -6  27   1   17.50   12.60
   6  27  -1  -13.00   15.40
  -5 -27   1   15.90    9.90
   5  27  -1    3.50   15.30
  -5  27   1   -4.60    7.40
  -4 -27   1   81.49   16.10
  -4  27   1   49.30   15.00
   4  27  -1   63.39   19.30
  -3 -27   1  -11.20    6.50
   3  27  -1  -15.50   11.60
  -3  27   1    5.80    8.30
  -2 -27   1   24.20    9.60
   2  27  -1   17.50   13.50
  -2  27   1   34.10   13.40
   1  27  -1   52.19   16.40
  -1  27   1   37.40   12.90
   0  27   1  141.49   22.80
   0  27  -1   82.89   19.60
  -1  27  -1    8.00    9.40
   1  27   1   15.10   13.50
   2  27   1   34.90   16.00
  -2  27  -1   40.40   13.10
  -3  27  -1   -3.30    7.60
   3  27   1   -8.00   10.70
  -4  27  -1   11.70   10.80
   4  27   1   52.39   20.70
   5  27   1   12.80   16.50
  -5  27  -1   10.60   11.80
   6  27   1   30.30   20.00
  -6  27  -1   19.00   13.60
   7  27   1   -0.90   16.70
  -7  27  -1  -13.10    7.90
   8  27   1  -18.90   17.30
  -8  27  -1   -6.50    9.80
  -8 -28   1   16.70   11.90
   8  28  -1  -16.60   16.30
  -8  28   1   18.60   12.90
  -7 -28   1  104.99   21.30
  -7  28   1   97.89   22.40
   7  28  -1   83.89   29.20
  -6 -28   1   81.69   17.10
  -6  28   1   69.29   19.20
   6  28  -1   36.10   19.80
  -5 -28   1    8.80    9.60
  -5  28   1   -8.80    7.70
   5  28  -1   31.30   19.10
  -4 -28   1   -5.40    8.10
   4  28  -1    5.20   12.80
  -4  28   1   -6.00    9.20
  -3 -28   1   14.90    9.80
   3  28  -1   10.60   12.90
  -3  28   1    7.40   10.60
   2  28  -1  137.69   25.30
  -2  28   1  141.29   23.70
   1  28  -1   24.60   12.80
  -1  28   1   17.30   11.20
   0  28  -1    7.00   10.20
   0  28   1   16.20   12.90
  -1  28  -1   23.40   10.70
   1  28   1   23.50   13.30
   2  28   1   55.19   18.70
  -2  28  -1   49.70   13.50
   3  28   1  -27.00   11.70
  -3  28  -1    0.80    8.70
  -4  28  -1   31.30   13.60
   4  28   1   33.90   18.60
  -5  28  -1   13.40   12.70
   5  28   1  -18.80   14.30
  -6  28  -1   19.70   13.70
   6  28   1   55.59   23.90
   7  28   1   99.69   29.00
  -7  28  -1   30.80   15.00
  -8  28  -1   26.40   14.30
   8  28   1   22.20   23.00
  -8 -29   1   52.29   15.90
  -8  29   1   51.19   17.60
   8  29  -1   33.50   23.40
  -7 -29   1   13.60   11.90
  -7  29   1   23.30   13.70
   7  29  -1   10.50   21.70
  -6 -29   1   23.00   11.90
  -6  29   1    4.30   10.60
   6  29  -1   22.70   19.60
  -5 -29   1   43.40   12.70
   5  29  -1   14.80   17.40
  -5  29   1   28.80   13.70
  -4 -29   1   85.49   17.90
  -4  29   1   57.19   16.60
   4  29  -1   85.79   23.80
  -3 -29   1   54.89   14.40
  -3  29   1   46.10   14.30
   3  29  -1   38.10   18.30
  -2  29   1    7.10   10.10
   2  29  -1   16.40   12.30
  -1  29   1   23.30   13.40
   1  29  -1    4.00   11.60
   0  29  -1  209.88   30.10
   0  29   1  186.38   30.10
  -1  29  -1  103.69   20.10
   1  29   1  152.48   26.90
  -2  29  -1   -2.10    8.80
   2  29   1   15.70   15.00
   3  29   1   23.80   15.10
  -3  29  -1    1.40   10.20
  -4  29  -1    5.00   10.60
   4  29   1    8.70   14.60
  -5  29  -1  137.59   25.70
   5  29   1  150.58   32.60
  -6  29  -1  131.29   24.10
   6  29   1  109.49   31.20
   7  29   1   11.90   21.40
  -7  29  -1    2.50   12.70
  -8  29  -1   23.40   14.00
   8  29   1   39.70   25.10
  -8 -30   1   26.50   12.60
  -8  30   1   23.10   13.90
   8  30  -1    3.70   19.30
  -7 -30   1  -10.00    9.50
   7  30  -1    0.40   19.40
  -7  30   1   14.20   13.30
  -6 -30   1    9.10   11.20
  -6  30   1   12.90   11.60
   6  30  -1   29.00   21.00
  -5 -30   1   11.60   11.20
   5  30  -1    7.60   17.70
  -5  30   1    5.20   10.60
  -4 -30   1    9.70    9.90
   4  30  -1   15.30   16.30
  -4  30   1    2.50    9.50
  -3 -30   1    8.10    9.70
  -3  30   1   28.40   12.50
   3  30  -1    1.80   13.10
   2  30  -1   63.59   18.30
  -2  30   1   46.30   14.50
  -1  30   1   19.70   12.80
   1  30  -1   24.50   15.00
   0  30  -1  -10.90   10.80
   0  30   1    8.00   12.90
  -1  30  -1   64.09   17.50
   1  30   1  102.69   22.00
  -2  30  -1   81.49   18.80
   2  30   1  104.29   24.20
   3  30   1    5.30   15.10
  -3  30  -1    2.50   10.00
  -4  30  -1  -20.40    7.10
   4  30   1    6.30   14.90
  -5  30  -1   -5.30    9.10
   5  30   1   13.60   17.00
   6  30   1   57.19   25.30
  -6  30  -1    8.30   12.40
  -7  30  -1   68.69   20.40
   7  30   1   66.79   27.60
  -8  30  -1   50.79   30.80
   8  30   1    5.00   20.20
  -8 -31   1    3.60   11.00
  -8  31   1    5.40   15.10
   8  31  -1   -9.50   17.80
  -7 -31   1   18.70   12.50
  -7  31   1   19.90   14.10
   7  31  -1    7.30   20.70
  -6 -31   1    1.70   10.00
   6  31  -1  -31.00   14.20
  -6  31   1    0.70   10.50
  -5 -31   1    8.00   10.40
  -5  31   1   -3.20    9.10
   5  31  -1    4.30   17.10
  -4 -31   1    7.60   10.60
  -4  31   1   -4.70   10.10
   4  31  -1   -0.50   15.70
  -3  31   1   11.20   11.10
   3  31  -1  -16.00   10.80
  -2  31   1   21.30   11.90
   2  31  -1   38.70   17.70
   1  31  -1   -1.70   11.80
  -1  31   1    3.70   11.20
   0  31  -1    2.40   10.70
   0  31   1   -2.20   11.10
  -1  31  -1   -5.10   10.40
   1  31   1   -6.50   12.90
   2  31   1   -2.90   13.60
  -2  31  -1   11.10   11.40
   3  31   1    6.30   15.80
  -3  31  -1    1.80    9.30
  -4  31  -1   15.90   10.50
   4  31   1   -0.50   17.80
   5  31   1   14.00   15.90
  -5  31  -1   20.80   12.30
  -6  31  -1    1.10   11.20
   6  31   1  -16.60   18.20
   7  31   1   -7.80   19.40
  -7  31  -1    0.10   12.00
  -7 -32   1   -3.90   10.80
  -7  32   1    1.20   10.40
   7  32  -1   -0.20   21.40
  -6 -32   1   32.10   13.90
  -6  32   1   14.90   12.50
   6  32  -1   13.40   17.30
  -5 -32   1  -15.10    8.40
  -5  32   1   -8.90    9.40
   5  32  -1    2.90   17.10
  -4 -32   1   40.20   14.30
   4  32  -1   15.60   17.20
  -4  32   1   37.00   13.40
   3  32  -1   11.70   14.30
  -3  32   1   -1.60    9.60
  -2  32   1   14.10   11.00
   2  32  -1   -2.10   13.60
   1  32  -1   48.00   17.30
  -1  32   1    8.40   11.90
   0  32   1    0.50   11.20
   0  32  -1   -7.30   11.30
   1  32   1   -1.70   11.70
  -1  32  -1   18.70   12.30
  -2  32  -1   28.30   13.00
   2  32   1   53.69   18.20
  -3  32  -1    6.60   10.60
   3  32   1   16.60   16.40
  -4  32  -1   -2.60   10.50
   4  32   1   -2.20   13.60
   5  32   1   31.90   20.80
  -5  32  -1   20.00   12.30
  -6  32  -1   25.90   15.30
   6  32   1    7.30   19.10
  -7  32  -1   -5.70   11.10
   7  32   1   21.70   24.10
  -7 -33   1   11.80   11.70
   7  33  -1   -0.60   19.80
  -7  33   1   -9.00   11.40
  -6 -33   1   16.00   12.00
   6  33  -1    1.50   17.60
  -6  33   1   -2.40   11.50
  -5 -33   1   77.99   18.30
  -5  33   1   67.79   17.40
   5  33  -1   37.00   22.20
  -4  33   1   49.10   16.10
   4  33  -1   38.40   21.20
  -3  33   1    4.60   10.50
   3  33  -1   -5.80   12.60
   2  33  -1   -3.90   12.70
  -2  33   1    6.10   12.30
   1  33  -1   86.89   21.90
  -1  33   1   99.99   22.30
   0  33  -1   58.69   17.50
   0  33   1   29.30   14.10
  -1  33  -1  163.68   27.70
   1  33   1  208.58   32.80
   2  33   1   24.90   15.80
  -2  33  -1   21.60   12.90
  -3  33  -1   -1.40   10.60
   3  33   1  -19.50   12.40
   4  33   1   84.89   26.40
  -4  33  -1   30.10   13.70
   5  33   1   45.90   24.20
  -5  33  -1   51.09   18.10
   6  33   1   33.40   21.60
  -6  33  -1   39.60   14.80
   7  33   1   29.10   23.50
  -7  33  -1  -22.10    9.40
  -7  34   1   44.00   16.40
   7  34  -1   48.10   24.00
   6  34  -1   36.40   23.20
  -6  34   1   52.99   17.10
   5  34  -1   28.00   21.70
  -5  34   1    9.80   13.20
  -4  34   1   -9.70    9.80
   4  34  -1    7.10   14.40
   3  34  -1  117.89   26.10
  -3  34   1   92.99   21.80
   2  34  -1   73.79   22.90
  -2  34   1   84.29   20.80
  -1  34   1    4.30   13.00
   1  34  -1    4.90   12.20
   0  34  -1   -4.70   11.30
   0  34   1   11.60   13.20
  -1  34  -1   21.40   13.40
   1  34   1   23.60   17.00
   2  34   1   80.99   23.40
  -2  34  -1   61.49   17.20
  -3  34  -1   42.00   15.40
   3  34   1   89.49   24.80
  -4  34  -1   13.80   13.50
   4  34   1   29.80   21.50
   5  34   1    1.80   17.60
  -5  34  -1  -16.10    8.80
   6  34   1   66.09   27.00
  -6  34  -1   26.60   14.90
   7  34   1   93.29   31.30
  -7  34  -1   55.59   19.10
  -7  35   1    5.30   14.70
   7  35  -1   39.00   23.00
  -6  35   1   16.20   13.20
   6  35  -1   12.50   19.50
   5  35  -1   48.90   24.30
  -5  35   1   34.90   15.70
  -4  35   1   30.60   13.90
   4  35  -1   37.50   18.80
   3  35  -1  -11.70   12.00
  -3  35   1    1.00   12.60
   2  35  -1   28.90   16.90
  -2  35   1    3.00   12.90
  -1  35   1   44.50   17.20
   1  35  -1   33.90   15.30
   0  35  -1   97.39   22.60
   0  35   1   87.29   22.20
   1  35   1  124.79   27.70
  -1  35  -1  138.59   26.30
   2  35   1   13.50   15.90
  -2  35  -1   -6.80   11.00
  -3  35  -1    8.70   12.20
   3  35   1    1.10   15.70
   4  35   1   28.40   19.70
  -4  35  -1   34.60   14.40
   5  35   1   19.10   21.30
  -5  35  -1   29.50   15.60
   6  35   1   11.70   22.00
  -6  35  -1    5.40   13.00
  -6  36   1  -12.30    9.90
   6  36  -1   -9.20   18.20
  -5  36   1   17.20   13.60
   5  36  -1   26.90   20.40
   4  36  -1  -18.20   13.50
  -4  36   1   -1.30   10.10
  -3  36   1    9.70   13.60
   3  36  -1    5.80   17.20
  -2  36   1   15.20   13.60
   2  36  -1  -21.40   12.40
  -1  36   1   24.70   15.80
   1  36  -1   41.10   17.60
   0  36   1    3.00   14.10
   0  36  -1   18.20   14.00
  -1  36  -1   10.70   14.70
   1  36   1   26.30   16.10
  -2  36  -1   81.19   20.00
   2  36   1   42.50   19.30
  -3  36  -1   -4.70   11.20
   3  36   1   18.10   18.20
   4  36   1  -13.00   14.80
  -4  36  -1   15.90   14.20
  -5  36  -1    0.70   11.20
   5  36   1   10.60   20.70
  -6  36  -1    3.20   11.50
   6  36   1    3.80   18.50
  -6  37   1    3.10   12.60
   6  37  -1   -8.40   17.20
  -5  37   1    9.10   12.10
   5  37  -1   24.00   20.80
  -4  37   1   -0.60   11.80
   4  37  -1   -6.20   15.70
  -3  37   1  -14.40   10.60
   3  37  -1  -12.00   15.40
   2  37  -1    3.60   14.70
  -2  37   1   16.50   12.50
   1  37  -1   -7.50   12.60
  -1  37   1   18.20   14.30
   0  37   1    8.70   16.50
   0  37  -1   30.30   15.40
  -1  37  -1   30.30   15.20
   1  37   1   -1.90   13.40
   2  37   1   12.60   17.00
  -2  37  -1   22.30   13.40
  -3  37  -1   -9.00    9.90
   3  37   1    9.60   19.30
  -4  37  -1    1.30   10.10
   4  37   1   -9.10   14.70
  -5  37  -1   -6.20   12.60
   5  37   1   32.50   20.80
  -6  37  -1  -13.70   11.70
   6  37   1  -13.10   18.60
   6  38  -1  -25.80   18.90
  -6  38   1   22.60   14.60
  -5  38   1   30.40   14.40
   5  38  -1   42.00   23.10
  -4  38   1   -1.70   12.80
   4  38  -1   12.90   19.40
  -3  38   1   18.20   14.70
   3  38  -1    8.80   16.50
  -2  38   1   -6.40   11.10
   2  38  -1   -6.00   15.50
   1  38  -1   27.70   16.60
  -1  38   1   -2.40   13.70
   0  38   1   -4.50   13.80
   0  38  -1   -1.40   13.70
  -1  38  -1   25.80   16.40
   1  38   1   20.40   17.70
  -2  38  -1   15.40   14.90
   2  38   1   16.70   17.00
   3  38   1   18.00   18.80
  -3  38  -1   -1.90   11.30
   4  38   1    8.20   18.60
  -4  38  -1   10.10   13.70
  -5  38  -1  -13.30   10.50
   5  38   1   -8.90   18.60
  -5  39   1   22.00   15.70
   5  39  -1   25.50   21.70
   4  39  -1   27.00   19.20
  -4  39   1    2.90   13.50
  -3  39   1   35.10   16.60
   3  39  -1   31.10   21.50
  -2  39   1   23.20   15.50
   2  39  -1    2.50   16.60
  -1  39   1   77.49   21.20
   1  39  -1   47.80   19.90
   0  39   1   94.89   24.60
   0  39  -1   86.29   23.20
   1  39   1   27.90   20.40
  -1  39  -1   51.89   19.60
   2  39   1   32.50   20.50
  -2  39  -1    4.00   11.70
   3  39   1   11.90   17.40
  -3  39  -1    9.00   11.70
   4  39   1   27.30   21.00
  -4  39  -1    9.60   13.30
  -5  39  -1   25.90   15.80
   5  39   1   50.69   26.60
   5  40  -1   21.50   20.40
  -5  40   1   -6.90   11.00
  -4  40   1    6.80   12.10
   4  40  -1   43.40   21.00
   3  40  -1   -5.40   18.20
  -3  40   1    5.70   15.10
  -2  40   1   57.09   20.50
   2  40  -1   53.79   22.70
  -1  40   1   57.59   21.40
   1  40  -1   38.50   19.30
   0  40   1    4.50   13.70
   0  40  -1   20.80   15.90
   1  40   1    0.40   17.70
  -1  40  -1   34.40   17.00
  -2  40  -1   41.20   17.40
   2  40   1  -11.50   15.50
  -3  40  -1   -7.00   13.90
   3  40   1   23.20   20.10
  -4  40  -1   13.10   14.10
   4  40   1   51.19   23.70
  -5  40  -1  -15.50   11.90
   5  40   1   20.90   23.90
   5  41  -1  -15.10   16.70
   4  41  -1   -3.90   18.60
  -4  41   1    7.20   12.90
   3  41  -1   32.20   20.40
  -3  41   1    8.50   15.20
  -2  41   1    2.80   13.50
   2  41  -1    7.30   16.60
  -1  41   1   -3.10   14.90
   1  41  -1   28.30   18.70
   0  41   1    8.00   17.10
   0  41  -1   10.90   15.90
   1  41   1   49.10   23.00
  -1  41  -1   61.79   20.90
  -2  41  -1   -2.50   12.60
   2  41   1  -14.70   15.00
  -3  41  -1   13.90   15.70
   3  41   1   30.10   22.20
  -4  41  -1  -22.40    9.10
   4  41   1   -7.80   17.20
   4  42  -1   11.30   19.00
  -4  42   1    3.30   12.30
   3  42  -1    7.40   18.20
  -3  42   1   -8.50   14.20
  -2  42   1  -11.50   13.20
   2  42  -1   15.10   19.90
  -1  42   1    2.90   15.70
   1  42  -1  -10.70   13.80
   0  42  -1    4.00   16.30
   0  42   1    5.60   17.60
   1  42   1  -13.00   16.30
  -1  42  -1   15.70   16.50
  -2  42  -1   25.90   14.60
   2  42   1    6.70   18.70
  -3  42  -1   -3.70   13.90
   3  42   1   27.10   21.50
  -4  42  -1    7.60   15.80
   4  42   1   46.50   26.10
  -3  43   1  -14.90   13.50
   3  43  -1   11.00   19.50
   2  43  -1   39.10   22.00
  -2  43   1   -9.10   13.30
  -1  43   1   11.60   15.60
   1  43  -1   14.80   17.30
   0  43   1   42.40   20.80
   0  43  -1    0.10   15.10
  -1  43  -1    7.90   15.30
   1  43   1    1.90   19.20
  -2  43  -1   10.70   16.20
   2  43   1   30.50   22.90
  -3  43  -1    5.60   14.20
   3  43   1  -12.40   18.50
  -3  44   1   10.40   17.30
   3  44  -1   22.30   22.90
  -2  44   1   22.90   18.30
   2  44  -1    8.40   19.60
   1  44  -1   -7.70   15.80
  -1  44   1   -6.30   13.10
   0  44   1  -14.70   13.10
   0  44  -1   -1.00   16.80
   1  44   1  -18.70   18.40
  -1  44  -1    7.40   16.70
   2  44   1   23.10   20.40
  -2  44  -1   62.39   22.80
   3  44   1   20.80   21.20
  -3  44  -1   -1.40   15.60
  -2  45   1    8.00   17.60
   2  45  -1   24.80   21.30
   1  45  -1   -8.30   18.00
  -1  45   1   34.30   21.00
   0  45   1    8.00   17.80
   0  45  -1   25.90   17.90
  -1  45  -1   23.00   18.70
   1  45   1   -1.60   18.40
  -2  45  -1   -5.50   15.90
   2  45   1  -14.30   17.20
   0  46  -1    0.60   17.20
  10   0  -2   35.60   22.60
   9   0  -2  184.68   37.30
   8   0  -2   30.80   18.30
   7   0  -2   80.09   21.50
  -7   0   2  114.19   15.30
   6   0  -2   -4.80   11.80
   5   0  -2  445.66   46.00
   4   0  -2  135.39   20.50
   3   0  -2 3197.58  270.57
   2   0  -2   31.00    8.30
  -1   0   2  147.19   13.20
   0   0   2 3927.11  324.17
   0   0   2 3848.72  324.47
   1   0   2 1595.94  137.49
   1   0   2 1633.04  135.49
   2   0   2  308.07   31.40
   2   0   2  290.57   26.10
  -3   0  -2   84.99    8.30
   3   0   2   85.39   10.10
   3   0   2  108.09   17.90
  -4   0  -2  332.77   28.80
   4   0   2  275.27   38.20
   4   0   2  342.97   30.00
  -5   0  -2  511.35   43.70
   5   0   2  476.65   52.69
   6   0   2  103.89   24.60
   7   0   2   -0.20   13.10
   8   0   2   12.80   15.80
   9   0   2  121.29   32.30
  10   0   2   55.29   25.30
  10  -1  -2   34.50   22.00
  10   1  -2   11.70   19.20
   9  -1  -2   61.99   23.80
   9   1  -2   20.30   20.30
   8  -1  -2  -25.00   11.90
   8   1  -2   29.50   18.00
   7  -1  -2   32.50   16.10
  -7  -1   2   40.30    9.30
   7   1  -2   37.80   16.40
  -7   1   2   48.70    9.60
  -6  -1   2  324.87   29.90
   6  -1  -2  265.47   39.20
   6   1  -2  296.17   39.50
   5  -1  -2   14.30   11.10
   5   1  -2    1.60    9.30
   4  -1  -2   -4.40    9.20
   4   1  -2    4.40    9.80
   3  -1  -2  179.38   23.60
   3   1  -2  224.98   25.00
   2  -1  -2 9999.00  829.32
   2   1  -2 9872.11  829.32
  -1  -1   2  239.58   21.10
  -1   1   2  231.78   21.20
   1   1  -2  264.37   21.60
  -1   1   2  240.88   21.30
   0  -1   2    4.50    2.10
   0  -1   2    3.90    3.30
   0   1   2    3.20    3.70
   0   1   2    3.00    2.00
   1  -1   2  280.07   27.70
   1  -1   2  292.07   24.80
   1   1   2  280.47   27.30
   1   1   2  277.17   24.60
   2  -1   2  246.88   22.80
   2  -1   2  285.77   29.90
   2   1   2  247.88   22.50
   2   1   2  270.67   27.60
  -3  -1  -2  430.76   38.80
   3  -1   2  468.95   46.00
   3  -1   2  450.65   39.80
   3   1   2  442.16   45.20
  -3   1  -2  456.85   38.40
   3   1   2  489.55   39.80
   4  -1   2   14.00   11.40
  -4  -1  -2   17.90    3.90
   4  -1   2   11.80    4.60
  -4   1  -2   18.20    3.40
   4   1   2   17.70    4.50
   4   1   2    8.60   10.70
   5  -1   2   49.00   15.80
  -5  -1  -2   50.99    7.00
   5   1   2   49.00   16.70
   6  -1   2   52.29   18.30
   6   1   2   76.49   22.00
   7  -1   2  342.87   47.90
   7   1   2  350.16   49.50
   8  -1   2   24.60   17.10
   8   1   2   49.20   21.40
   9  -1   2   -9.70   17.50
   9   1   2   43.40   23.00
  10  -1   2   -4.00   17.10
  10   1   2   74.69   26.50
  10  -2  -2   -2.50   19.20
  10   2  -2   35.40   22.00
   9  -2  -2   28.20   19.60
   9   2  -2   16.90   20.50
   8  -2  -2    8.20   15.00
   8   2  -2    3.50   15.30
  -7  -2   2    7.50    5.90
   7  -2  -2    1.00   12.90
   7   2  -2    7.20   13.00
  -6  -2   2   -4.00    3.90
   6  -2  -2  -18.50   10.60
   6   2  -2   12.70   13.00
   5  -2  -2    8.70   11.00
   5   2  -2   11.60   11.70
   4  -2  -2  496.95   48.90
   4   2  -2  502.55   48.80
   3  -2  -2  839.42   78.99
   3   2  -2  946.91   79.49
   2  -2  -2 1200.68  101.39
   2   2  -2 1161.08  101.29
  -1  -2   2    5.50    2.30
  -1   2   2    3.30    3.00
  -1   2   2    2.70    2.60
   1   2  -2    2.00    3.50
   0  -2   2 1116.79   96.49
   0   2   2 1110.59   96.89
   0   2   2 1213.98   96.29
   1  -2   2  362.56   31.20
   1  -2   2  395.76   34.00
   1   2   2  350.46   33.70
   1   2   2  348.77   31.00
   2  -2   2   22.60   10.60
   2  -2   2   31.10    5.40
   2   2   2   33.00    5.10
   2   2   2   33.10   11.40
   3  -2   2    3.50    3.40
   3  -2   2   -3.50    9.20
  -3  -2  -2    2.60    2.50
   3   2   2    3.90    3.30
   3   2   2    2.50   10.30
  -3   2  -2    4.10    1.50
  -4  -2  -2   88.99    9.20
   4  -2   2   77.99   10.50
   4  -2   2   78.79   17.20
  -4   2  -2   72.89    7.60
   4   2   2   47.00   15.60
   4   2   2   78.19    9.50
   5  -2   2  322.97   41.30
  -5  -2  -2  341.67   29.50
   5   2   2  268.97   40.40
   6  -2   2   13.00   13.00
   6   2   2   10.80   14.10
   7  -2   2    5.50   15.10
   7   2   2  -19.80   11.20
   8  -2   2    7.60   16.60
   8   2   2   26.60   19.50
   9  -2   2   28.70   20.40
   9   2   2   76.69   26.10
  10  -2   2  -10.50   17.80
  10   2   2    3.70   18.80
  10  -3  -2   -1.40   16.30
  10   3  -2  -23.90   16.20
   9  -3  -2  -11.20   13.90
   9   3  -2   -5.50   16.80
   8  -3  -2    8.70   16.80
   8   3  -2   16.30   17.90
  -7  -3   2    9.20    6.10
   7  -3  -2   -9.30   12.70
   7   3  -2    8.40   12.80
  -6  -3   2   -5.20    3.90
   6  -3  -2    0.00   10.30
   6   3  -2    8.90   12.90
  -5  -3   2   30.50    7.00
   5  -3  -2   32.40   13.90
   5   3  -2   22.40   13.00
   4  -3  -2   21.80   10.70
   4   3  -2   74.79   15.20
   3  -3  -2    1.20    8.00
   3   3  -2    1.40    8.60
  -2  -3   2  643.34   53.59
  -2   3   2  620.44   54.69
   2   3  -2  628.64   55.89
  -1  -3   2   14.90    2.80
  -1   3   2   11.70    3.90
   1   3  -2   12.00    4.40
   0  -3   2    7.80    2.90
   0   3  -2   11.50    3.20
   0   3   2    9.60    2.70
   0   3   2   11.50    4.60
   1  -3   2 1753.62  141.19
   1  -3   2 1693.53  140.49
   1  -3   2 1594.34  142.79
   1   3   2 1638.04  143.19
   1   3   2 1704.63  140.79
   2  -3   2   23.90    9.60
   2  -3   2   37.70    5.70
   2   3   2   27.60   10.90
   2   3   2   28.90    4.70
   3  -3   2   -1.30    8.50
  -3  -3  -2   -0.20    2.60
   3  -3   2   13.20    4.40
   3   3   2   -0.80    8.50
   3   3   2    3.20    3.40
  -4  -3  -2   54.99    7.30
   4  -3   2   58.49   15.60
   4  -3   2   41.90    8.20
  -4   3  -2   56.39    5.90
   4   3   2   54.29   16.20
   4   3   2   55.59    7.50
   5  -3   2  315.07   41.10
  -5  -3  -2  318.77   29.80
   5   3   2  461.85   47.60
   6  -3   2   27.50   15.90
   6   3   2   32.50   17.70
   7  -3   2   33.50   16.80
   7   3   2   13.00   15.80
   8  -3   2    2.20   17.30
   8   3   2  -10.20   16.10
   9  -3   2    9.60   16.10
   9   3   2   -2.40   15.80
  10  -3   2    1.10   17.00
  10   3   2   11.70   18.30
  10  -4  -2  -11.20   16.40
  10   4  -2   32.70   21.50
   9  -4  -2   19.70   18.00
   9   4  -2   48.60   23.30
   8  -4  -2   37.50   18.40
   8   4  -2   33.00   18.20
   7  -4  -2   -6.00   12.60
  -7  -4   2   -0.30    5.70
   7   4  -2    1.40   12.50
  -6  -4   2    6.10    5.30
   6  -4  -2   11.40   12.60
   6   4  -2   12.10   12.20
   5  -4  -2  627.64   65.69
  -5  -4   2  708.13   61.59
   5   4  -2  742.53   67.59
   4  -4  -2  357.06   36.80
  -4  -4   2  349.57   32.90
   4   4  -2  369.06   38.00
  -3  -4   2   17.00    5.00
   3   4  -2   -2.00    8.20
  -2  -4   2  103.29    9.80
  -2   4   2  107.89   12.40
   2   4  -2  100.29   13.80
  -1  -4   2   -3.00    3.50
  -1  -4   2    1.40    2.00
  -1   4   2    5.00    4.00
   1   4  -2    4.10    4.30
   0  -4   2   59.89    7.20
   0  -4   2   55.19    6.60
   0   4   2   51.19    8.50
   0   4   2   75.29    6.80
   0   4  -2   57.69    7.00
   1  -4   2  445.66   38.20
   1  -4   2  441.86   37.50
   1  -4   2  447.86   40.50
   1   4   2  429.46   40.90
   1   4   2  443.86   37.70
   2  -4   2  179.28   17.10
   2  -4   2  186.28   23.00
   2   4   2  169.88   16.20
   2   4   2  222.88   24.80
  -3  -4  -2   40.90    5.80
   3  -4   2   33.00   11.80
   3  -4   2   32.20    6.80
   3   4   2   40.30    5.60
   3   4   2   14.60   10.60
  -4  -4  -2   77.79   10.10
   4  -4   2   82.89   18.70
   4   4   2  105.09   10.60
  -4   4  -2   85.19    8.30
   4   4   2   77.69   18.20
  -5  -4  -2   29.50    5.70
   5  -4   2   23.90   13.10
   5   4   2   -0.20   11.20
   6  -4   2  242.78   37.10
   6   4   2  218.48   36.00
   7  -4   2   36.30   17.90
   7   4   2   63.79   20.00
   8  -4   2   34.30   19.10
   8   4   2   37.50   21.20
   9  -4   2   -6.90   15.00
   9   4   2   10.60   18.90
  10  -4   2  -12.00   17.60
  10   4   2   15.00   20.20
  10   5  -2   25.70   22.10
   9  -5  -2    2.30   15.50
   9   5  -2  -12.10   15.90
   8  -5  -2   -5.70   13.80
   8   5  -2  -35.70   12.20
   7  -5  -2   57.09   20.30
  -7  -5   2   84.89   13.50
   7   5  -2   86.79   22.90
  -6  -5   2  203.68   25.10
   6  -5  -2  235.88   34.30
   6   5  -2  304.57   37.00
   5  -5  -2  391.56   42.50
  -5  -5   2  328.57   32.30
   5   5  -2  328.97   41.00
  -4  -5   2    5.90    4.90
   4  -5  -2    9.40   10.20
   4   5  -2    7.70   10.30
  -3  -5   2  286.67   26.90
  -3   5   2  274.67   27.20
   3   5  -2  307.07   30.20
  -2  -5   2   19.60    5.60
  -2  -5   2    9.50    2.40
  -2   5   2   14.10    5.50
   2   5  -2   -3.60    6.50
  -1  -5   2  127.99   13.40
  -1  -5   2  132.99   11.80
  -1   5   2  138.89   13.60
   1   5  -2  122.69   13.80
   0  -5   2  841.42   69.99
   0  -5   2  851.01   70.39
   0   5   2  821.62   69.89
   0   5   2  815.52   71.19
   0   5  -2  820.12   70.39
   1  -5   2  876.21   76.09
   1  -5   2  909.61   76.59
   1   5   2  928.71   78.99
   1   5   2  906.31   76.09
  -1   5  -2  918.21   77.29
   2  -5   2   87.39    9.80
   2  -5   2   94.79   15.50
   2   5   2   67.49   13.80
   2   5   2   77.19    8.10
   3  -5   2  930.11   90.89
   3  -5   2 1018.70   86.39
  -3  -5  -2 1018.30   85.89
   3   5   2 1012.10   91.39
   3   5   2 1033.10   85.49
   4  -5   2  125.19   22.30
  -4  -5  -2  115.39   11.90
   4   5   2   85.89   19.80
   4   5   2  108.89   12.10
   5  -5   2   16.80   12.40
  -5  -5  -2   35.10    6.20
   5   5   2   31.70   14.70
   6  -5   2  109.69   24.20
   6   5   2  127.29   27.20
   7  -5   2  167.38   32.40
   7   5   2  149.09   30.40
   8  -5   2  102.79   27.10
   8   5   2  151.78   32.80
   9  -5   2   13.00   18.10
   9   5   2   17.80   19.30
  10  -5   2   -4.30   17.50
  10   5   2    5.20   18.60
 -10   6   2   58.69   18.10
  10   6  -2   52.09   24.60
   9   6  -2  168.18   35.70
   8  -6  -2   83.09   23.70
   8   6  -2   84.79   25.00
  -7  -6   2    1.80    5.70
   7  -6  -2   -3.00   12.50
   7   6  -2  -18.20   12.90
   6  -6  -2   79.89   18.50
  -6  -6   2   69.69   11.80
   6   6  -2   48.30   17.30
   5  -6  -2  595.04   58.59
  -5  -6   2  631.94   53.99
   5   6  -2  537.75   58.69
  -4  -6   2  315.17   30.70
  -4   6   2  315.87   31.30
   4   6  -2  364.46   35.90
  -3  -6   2   33.30    7.00
  -3  -6   2   27.60    4.00
  -3   6   2   24.40    7.60
   3   6  -2   28.40   10.00
  -2  -6   2   30.10    3.80
  -2  -6   2   29.90    6.70
   2   6  -2   42.80    9.10
  -2   6   2   29.30    7.00
  -1  -6   2  554.14   48.10
  -1  -6   2  589.84   49.50
   1   6  -2  583.64   49.50
  -1   6   2  558.84   49.60
   0  -6   2  329.97   28.10
   0  -6   2  319.47   28.60
   0   6  -2  339.27   28.90
   0   6   2  308.67   27.90
   0   6   2  327.47   29.80
   1  -6   2 8683.43  740.03
   1  -6   2 8987.40  740.53
   1   6   2 8879.31  739.83
  -1   6  -2 8859.71  741.13
   1   6   2 9020.70  742.63
   2  -6   2  285.87   24.40
   2  -6   2  255.17   27.90
   2   6   2  230.98   29.60
   2   6   2  265.57   23.20
   3  -6   2  106.29   12.60
   3  -6   2   92.89   17.60
  -3  -6  -2  115.39   12.50
   3   6   2  107.59   10.90
   3   6   2  132.79   20.20
   4  -6   2   30.40   13.30
  -4  -6  -2   28.50    5.60
   4   6   2   28.00    5.00
   4   6   2   45.00   13.60
   5  -6   2   28.10   13.50
  -5  -6  -2   27.30    6.10
   5   6   2   25.50   13.60
   6  -6   2  116.99   24.20
   6   6   2  100.29   24.50
   7  -6   2  177.08   32.60
   7   6   2  141.29   31.30
   8  -6   2   99.49   27.00
   8   6   2   69.89   26.40
   9  -6   2   22.20   18.50
   9   6   2   16.50   19.70
  10  -6   2   32.30   20.10
  10   6   2  -33.80   17.60
 -10   7   2    6.00   13.00
  10   7  -2   36.40   24.00
   9   7  -2   23.90   19.10
  -9   7   2    7.10   10.70
   8   7  -2   -8.00   12.90
  -7  -7   2  169.48   21.20
   7   7  -2  151.08   30.00
  -6  -7   2   21.70    7.70
   6   7  -2   23.80   14.50
  -5  -7   2    4.10    4.90
  -5   7   2    0.90    5.40
   5   7  -2   -3.70   10.40
  -4  -7   2  205.38   20.80
  -4   7   2  191.98   23.50
   4   7  -2  183.38   26.00
  -3  -7   2  718.13   64.79
  -3  -7   2  751.92   62.69
  -3   7   2  740.23   65.39
   3   7  -2  752.32   67.29
  -2  -7   2   93.29    8.90
  -2  -7   2  111.99   12.50
   2   7  -2  107.79   14.60
  -2   7   2   86.89   12.10
  -1  -7   2   35.10    4.60
  -1  -7   2   50.59    7.70
  -1   7   2   41.90    7.80
   1   7  -2   44.30    7.60
   0  -7   2  265.27   24.70
   0  -7   2  291.77   24.20
   0   7  -2  261.97   25.10
   0   7   2  282.47   24.00
   0   7   2  259.77   26.30
   1  -7   2  695.33   59.19
  -1   7  -2  732.23   60.69
   1   7   2  673.63   58.69
   1   7   2  702.93   62.29
   2  -7   2   28.40    5.70
  -2   7  -2   22.10    6.60
   2   7   2   29.00    4.00
   2   7   2   30.30   10.50
  -3  -7  -2  144.79   14.80
   3  -7   2  144.09   14.90
   3  -7   2  115.09   20.00
   3   7   2  151.38   13.60
   3   7   2  126.39   21.50
  -4  -7  -2   36.60    7.00
   4  -7   2   41.40   13.40
   4   7   2   48.40    6.40
   4   7   2   18.60   12.70
  -5  -7  -2   21.30    5.60
   5  -7   2   18.80   11.70
   5   7   2   23.00   14.90
   6  -7   2   15.50   13.50
   6   7   2   -3.10   12.50
   7  -7   2   81.79   22.60
   7   7   2   86.59   26.00
   8  -7   2   13.80   17.90
   8   7   2   39.20   22.10
   9  -7   2    9.60   16.50
   9   7   2   18.50   21.00
  10   7   2   11.90   21.30
 -10   8   2    4.90   11.00
  10   8  -2   30.70   23.40
  -9   8   2   -5.20   10.50
   9   8  -2   21.00   16.50
  -8   8   2   32.30   13.80
   8   8  -2   38.30   19.30
  -7  -8   2  100.49   14.50
  -7   8   2   50.89   13.90
   7   8  -2   92.99   22.90
  -6  -8   2    1.00    5.80
   6   8  -2   44.60   16.80
  -6   8   2   19.80    8.80
  -5  -8   2   -0.10    5.00
  -5   8   2   -6.90    6.30
   5   8  -2   -0.40   10.60
  -4  -8   2  160.08   18.50
  -4   8   2  156.08   20.10
   4   8  -2  152.98   23.60
  -3  -8   2   83.29   11.80
  -3  -8   2   82.89    7.90
  -3   8   2   66.59   12.20
   3   8  -2   80.59   14.80
  -2  -8   2    2.90    1.60
  -2  -8   2    6.70    5.10
   2   8  -2   -3.40    6.30
  -2   8   2   -3.80    5.40
  -1  -8   2   65.99    9.40
  -1  -8   2   67.69    7.10
   1   8  -2   79.69   10.40
  -1   8   2   88.19   11.00
   0  -8   2  621.24   51.79
   0  -8   2  574.54   50.99
   0   8   2  587.44   52.99
   0   8   2  619.64   50.99
   0   8  -2  592.74   51.99
   1  -8   2 1908.41  156.48
   1  -8   2 1823.52  156.68
   1   8   2 1844.92  155.88
   1   8   2 1848.02  159.18
  -1   8  -2 1900.61  157.68
   2  -8   2  117.09   12.90
  -2   8  -2  133.89   15.80
   2   8   2  114.19   10.70
   2   8   2   98.79   17.00
  -3  -8  -2  160.38   16.60
   3  -8   2  154.98   16.70
   3   8   2  189.68   25.30
   3   8   2  171.08   15.30
   4  -8   2   42.40   14.30
  -4  -8  -2   73.79   10.10
   4   8   2  108.39   20.70
   4   8   2   70.99    8.40
   5  -8   2   75.49   19.20
  -5  -8  -2   70.89   10.50
   5   8   2   79.69   20.60
   6  -8   2   21.50   15.00
   6   8   2   33.10   17.30
   7  -8   2   -3.30   14.30
   7   8   2   19.80   16.20
   8  -8   2   -7.80   13.30
   8   8   2   -5.90   15.90
   9  -8   2   -3.90   14.40
   9   8   2  -10.40   15.70
  10   8   2   -3.70   18.30
  10   9  -2   29.10   20.90
 -10   9   2   21.50   13.20
  -9   9   2  -12.80    8.80
   9   9  -2   19.60   17.90
  -8   9   2   10.40   10.50
   8   9  -2   17.20   17.70
  -7  -9   2   19.90    7.70
   7   9  -2   38.60   19.30
  -7   9   2   12.80    9.30
  -6  -9   2  122.69   17.50
   6   9  -2  150.58   26.00
  -6   9   2  147.49   21.70
  -5  -9   2   96.59   14.00
  -5   9   2  103.09   16.50
   5   9  -2   90.19   20.00
  -4  -9   2  152.88   14.10
  -4  -9   2  193.38   20.00
  -4   9   2  122.29   18.60
   4   9  -2  160.08   22.80
  -3  -9   2   83.99    8.00
  -3  -9   2   81.59   12.30
  -3   9   2  100.79   13.40
   3   9  -2   73.99   14.80
  -2  -9   2  308.77   28.60
  -2  -9   2  307.07   26.10
   2   9  -2  312.07   30.20
  -2   9   2  291.87   29.10
  -1  -9   2  372.46   31.50
  -1  -9   2  382.76   33.40
  -1   9   2  341.37   33.90
   1   9  -2  368.16   33.90
   0  -9   2   54.79    8.10
   0  -9   2   51.59    6.60
   0   9   2   51.49    6.40
   0   9  -2   71.99    9.30
   0   9   2   72.19   10.70
   1  -9   2  528.85   47.50
   1  -9   2  555.84   47.60
   1   9   2  563.54   46.70
  -1   9  -2  543.45   48.90
   1   9   2  565.04   50.59
   2  -9   2  824.62   72.99
   2   9   2  880.41   71.69
  -2   9  -2  824.82   74.39
   2   9   2  862.81   77.29
  -3  -9  -2  179.18   18.10
   3  -9   2  191.78   18.10
   3   9   2  150.68   24.70
   3   9   2  168.08   16.00
  -3   9  -2  199.88   22.10
  -4  -9  -2  432.26   37.10
   4   9   2  325.57   44.50
   4   9   2  406.26   35.30
  -5  -9  -2  124.29   14.80
   5  -9   2   94.49   22.20
   5   9   2  117.19   25.00
   6  -9   2   15.60   13.70
   6   9   2   29.50   14.80
   7  -9   2   81.39   23.90
   7   9   2   82.89   23.80
   8  -9   2   48.20   21.10
   8   9   2   71.29   24.40
   9   9   2   12.90   20.70
  10   9   2   19.70   23.10
 -10   9  -2   14.40   13.60
 -10  10   2   84.59   21.70
  10  10  -2   77.59   27.40
  -9  10   2   97.99   21.90
   9  10  -2   71.09   25.20
  -8  10   2   60.79   17.60
   8  10  -2   34.00   19.60
  -7 -10   2   78.49   13.50
   7  10  -2   66.69   20.20
  -7  10   2   70.99   16.50
  -6 -10   2  106.19   15.30
  -6  10   2   98.09   18.40
   6  10  -2   91.89   21.30
  -5 -10   2   23.10    7.60
  -5  10   2    4.20    7.10
   5  10  -2   12.70   10.90
  -4 -10   2 1006.50   88.19
  -4 -10   2 1022.90   85.19
   4  10  -2 1034.60   91.99
  -4  10   2  978.40   89.19
  -3 -10   2   19.20    2.90
  -3 -10   2   21.20    6.60
   3  10  -2   15.70    9.50
  -3  10   2   21.30    7.90
  -2 -10   2   55.39   10.20
  -2 -10   2   71.49    6.70
  -2  10   2   63.79   11.00
   2  10  -2   92.99   13.50
  -1 -10   2  523.05   47.10
  -1 -10   2  541.05   45.50
  -1  10   2  555.94   48.10
   1  10  -2  518.55   47.70
   0 -10   2  189.78   18.50
   0 -10   2  194.68   17.50
   0  10   2  191.38   17.20
   0  10   2  184.18   20.20
   0  10  -2  181.68   19.20
   1 -10   2 1324.17  110.39
   1 -10   2 1273.17  110.39
   1  10   2 1239.28  112.99
  -1  10  -2 1339.77  111.69
   1  10   2 1331.07  109.39
   2 -10   2  739.93   65.89
   2  10   2  761.82   70.19
   2  10   2  779.22   64.39
  -2  10  -2  770.92   67.49
   3 -10   2   39.90    7.40
  -3 -10  -2   39.70    7.70
  -3  10  -2   40.20   10.60
   3  10   2   41.80    5.20
   3  10   2   22.80   11.50
  -4 -10  -2  316.57   30.30
  -4  10  -2  315.77   32.50
   4  10   2  321.97   28.30
   4  10   2  348.27   41.30
  -5 -10  -2   88.39   12.10
   5  10   2   56.49   18.40
   6  10   2  375.06   49.30
   7  10   2   10.60   14.80
   8  10   2   66.29   26.10
  -9  10  -2   54.59   15.70
   9  10   2   28.20   22.20
  10  10   2   16.20   21.10
 -10  10  -2   42.50   18.40
 -10  11   2  107.89   24.50
  10  11  -2   35.70   25.50
   9  11  -2    1.70   16.70
  -9  11   2   11.10   12.40
  -8  11   2   73.09   17.50
   8  11  -2  116.09   26.80
  -7 -11   2  324.27   34.50
   7  11  -2  333.17   47.70
  -7  11   2  387.66   39.10
  -6 -11   2  176.28   22.10
  -6  11   2  193.48   25.50
   6  11  -2  162.28   29.80
  -5 -11   2  230.58   24.00
   5  11  -2  231.78   32.60
  -5  11   2  219.08   27.70
  -4 -11   2   11.10    6.20
  -4 -11   2   12.00    2.50
   4  11  -2   14.80   10.50
  -4  11   2   19.20    8.40
  -3 -11   2   53.89    5.30
  -3 -11   2   59.39   10.20
  -3  11   2   65.59   10.90
   3  11  -2   27.80   10.90
  -2 -11   2   95.69    8.80
  -2 -11   2   85.79   12.40
  -2  11   2  115.29   14.80
   2  11  -2   99.19   14.70
  -1 -11   2  280.87   27.20
  -1 -11   2  285.07   25.40
  -1  11   2  313.67   28.40
   1  11  -2  305.77   28.40
   0 -11   2  108.89   11.60
   0 -11   2  128.59   14.00
   0  11  -2  138.49   15.20
   0  11   2  126.59   16.10
   1 -11   2 1144.49   98.99
   1 -11   2 1135.99   98.79
   1  11   2 1195.28  102.19
   1  11   2 1210.98   97.89
  -1  11  -2 1136.99  100.09
   2 -11   2   72.79    9.50
  -2  11  -2  102.29   13.20
   2  11   2   66.29    7.00
   2  11   2   65.19   14.10
  -3 -11  -2  848.92   76.49
   3  11   2  878.71   74.29
  -3  11  -2  951.90   78.69
   3  11   2  852.91   81.59
  -4 -11  -2  816.52   68.39
  -4  11  -2  775.82   70.69
   4  11   2  714.23   74.59
   4  11   2  774.32   66.09
  -5 -11  -2   62.19   10.50
   5  11   2   47.00   17.20
  -5  11  -2   63.39   14.00
   6  11   2  191.28   32.70
  -6  11  -2  175.08   24.90
  -7  11  -2   42.00   13.20
   7  11   2    9.50   16.10
   8  11   2  143.59   32.70
  -8  11  -2  174.18   27.60
  -9  11  -2   17.70   14.50
   9  11   2    7.50   17.90
 -10  11  -2   31.80   16.80
  10  11   2    8.60   19.70
 -10  12   2  -10.60   10.80
  10  12  -2    0.20   19.80
   9  12  -2   12.10   19.80
  -9  12   2  -11.40    9.70
   8  12  -2   28.10   18.50
  -8  12   2   48.10   15.40
  -7 -12   2  149.49   20.40
  -7  12   2  125.89   21.90
   7  12  -2  162.28   31.20
  -6 -12   2  116.79   17.70
   6  12  -2  173.38   29.00
  -6  12   2  142.09   21.10
  -5 -12   2   -1.60    4.40
   5  12  -2   12.40   11.80
  -5  12   2   -3.80    7.20
  -4 -12   2   22.40    3.10
  -4 -12   2   19.60    7.00
  -4  12   2   21.30    8.40
   4  12  -2    8.20   11.50
  -3 -12   2  119.49   10.00
  -3 -12   2  106.69   15.10
   3  12  -2   97.89   17.20
  -3  12   2   80.39   14.60
  -2 -12   2   12.00    6.10
  -2 -12   2    9.50    2.10
   2  12  -2   15.30    7.70
  -2  12   2    2.10    5.10
  -1 -12   2   35.30    7.20
  -1 -12   2   34.40    4.70
  -1  12   2   35.10    9.00
   1  12  -2   28.70    8.30
   0 -12   2  140.39   13.90
   0 -12   2  132.59   15.70
   0  12  -2  175.28   17.80
   0  12   2  151.78   19.30
   1 -12   2  107.79   12.20
   1 -12   2   99.19   12.40
   1  12   2  113.99   10.40
  -1  12  -2  119.49   15.00
   1  12   2  108.99   16.80
   2 -12   2  140.79   15.20
  -2  12  -2  141.49   17.90
   2  12   2  132.19   12.10
   2  12   2  133.19   20.40
  -3 -12  -2  544.75   47.80
  -3  12  -2  506.85   49.40
   3  12   2  522.05   45.10
   3  12   2  582.34   53.89
  -4 -12  -2  167.28   19.70
   4  12   2  177.28   27.00
   4  12   2  167.18   15.30
  -4  12  -2  150.78   21.70
  -5 -12  -2   22.30    7.00
   5  12   2    8.10   12.90
  -5  12  -2    7.70    8.40
  -6 -12  -2  222.08   27.00
  -6  12  -2  258.07   31.60
   6  12   2  203.68   36.00
   7  12   2   25.90   18.10
  -7  12  -2    4.70    9.40
  -8  12  -2   15.60   12.30
   8  12   2   11.80   19.70
   9  12   2   31.80   22.30
  -9  12  -2   15.70   13.80
  10  12   2   47.20   26.70
 -10  12  -2   27.70   17.60
 -10  13   2  -11.00    9.10
  10  13  -2    7.70   20.70
  -9  13   2    9.20   11.60
   9  13  -2   13.50   18.60
  -8 -13   2   13.20    9.00
   8  13  -2    4.20   14.30
  -8  13   2    2.10   10.20
  -7 -13   2    3.60    7.20
   7  13  -2    1.30   16.70
  -7  13   2   15.80   11.10
  -6 -13   2   73.69   13.20
   6  13  -2   44.80   17.00
  -6  13   2   57.49   13.80
  -5 -13   2   16.60    7.30
  -5  13   2   23.50   10.00
   5  13  -2   30.80   13.80
  -4 -13   2  136.49   16.50
  -4 -13   2   99.59    9.20
   4  13  -2   92.09   18.50
  -4  13   2   92.39   15.40
  -3 -13   2   27.50    3.10
  -3 -13   2   20.50    6.80
  -3  13   2   24.90    8.70
   3  13  -2   23.30   10.80
  -2 -13   2   70.09    6.70
  -2 -13   2   82.99   11.60
   2  13  -2   61.99   13.40
  -2  13   2   47.60   10.60
  -1 -13   2  286.57   25.70
  -1 -13   2  296.47   27.90
  -1  13   2  301.67   29.40
   1  13  -2  302.37   29.20
   0 -13   2    2.40    3.00
   0 -13   2    2.40    4.30
   0  13  -2   -1.40    5.60
   0  13   2    9.80    7.10
   1 -13   2  510.65   45.10
   1 -13   2  515.95   45.50
  -1  13  -2  490.45   47.00
   1  13   2  513.75   48.70
   1  13   2  533.25   44.00
   2 -13   2   -1.40    4.10
   2  13   2    1.00    1.80
   2  13   2   -0.10    8.60
  -2  13  -2    7.30    7.10
   3  13   2   51.89    5.70
  -3  13  -2   42.90   11.20
   3  13   2   60.69   14.80
  -4 -13  -2  171.48   20.00
   4  13   2  169.28   15.80
   4  13   2  172.28   28.40
  -4  13  -2  145.99   21.60
  -5 -13  -2    5.60    5.40
  -5  13  -2    9.40    9.80
   5  13   2  -10.00   11.90
  -6 -13  -2    2.50    6.10
   6  13   2   -7.60   13.60
  -6  13  -2   10.70   10.10
   7  13   2   -1.00   13.70
  -7  13  -2   -2.80    8.90
  -8  13  -2   35.00   14.80
   8  13   2   42.20   22.50
  -9  13  -2  -15.10    9.90
   9  13   2  -31.60   15.70
  10  13   2    8.00   22.10
 -10  13  -2   31.20   15.70
  10  14  -2  -28.40   17.30
 -10  14   2   -4.50   11.00
   9  14  -2   23.60   21.30
  -9  14   2   13.30   12.30
  -8 -14   2   -3.60    6.50
  -8  14   2    0.00    9.30
   8  14  -2    7.90   16.90
  -7 -14   2    4.40    6.80
  -7  14   2   11.30   10.80
   7  14  -2   34.50   18.70
  -6 -14   2   54.59   11.30
   6  14  -2   19.40   16.40
  -6  14   2   59.09   14.20
  -5 -14   2   15.40    7.40
  -5  14   2   15.90    8.80
   5  14  -2    5.60   11.20
  -4 -14   2  621.54   55.89
   4  14  -2  607.84   59.79
  -4  14   2  607.84   57.19
  -3 -14   2   -1.70    5.20
  -3 -14   2   -0.10    1.10
   3  14  -2    2.30    8.90
  -3  14   2   -1.20    5.70
  -2 -14   2    0.90    1.80
  -2 -14   2   -7.20    4.20
   2  14  -2   -1.00    7.50
  -2  14   2    2.50    6.10
  -1 -14   2   34.70    7.70
  -1 -14   2   22.60    4.10
  -1  14   2   31.60    9.00
   1  14  -2   25.60    8.40
   0 -14   2   28.80    5.00
   0 -14   2   19.50    5.90
   0  14  -2   21.00    7.50
   0  14   2   12.40    8.10
   1 -14   2  894.91   76.59
   1 -14   2  870.71   77.09
   1  14   2  892.51   75.49
   1  14   2  967.70   80.79
  -1  14  -2  874.41   78.39
  -2  14  -2  189.38   20.40
   2  14   2  135.99   21.10
   2  14   2  135.59   12.60
   3  14   2    6.40    2.10
  -3  14  -2   -1.10    6.30
   3  14   2    7.10   11.20
  -4 -14  -2   35.60    8.40
  -4  14  -2   20.20    9.10
   4  14   2   31.50   13.90
  -5 -14  -2  155.88   19.40
  -5  14  -2  143.09   22.10
   5  14   2  155.48   28.70
  -6 -14  -2    8.00    6.90
   6  14   2  -15.40   12.00
  -6  14  -2   13.60   10.80
   7  14   2   17.30   16.80
  -7  14  -2   24.10   12.80
   8  14   2    6.90   19.00
  -8  14  -2   12.20   11.90
   9  14   2   48.70   26.50
  -9  14  -2   19.10   13.90
  10  14   2    0.70   22.90
 -10  15   2   22.20   14.90
  10  15  -2   19.10   22.90
   9  15  -2  -10.80   16.10
  -9  15   2   18.60   12.60
  -8 -15   2    2.30    7.90
  -8  15   2    7.80   11.20
   8  15  -2   33.30   19.60
  -7 -15   2  201.28   23.80
   7  15  -2  121.49   30.40
  -7  15   2  155.48   25.10
  -6 -15   2  385.26   38.50
   6  15  -2  388.76   48.90
  -6  15   2  387.16   41.00
  -5 -15   2   12.80    7.40
   5  15  -2   -4.60   11.00
  -5  15   2    1.90    7.20
  -4 -15   2   72.29   12.40
  -4  15   2   59.49   13.10
   4  15  -2   47.70   15.60
  -3 -15   2  133.19   16.10
  -3  15   2   83.99   15.10
   3  15  -2  111.59   17.80
  -2 -15   2   19.10    3.00
  -2 -15   2   17.80    6.50
  -2  15   2   18.60    7.70
   2  15  -2    7.50    8.30
  -1 -15   2  729.23   63.89
  -1 -15   2  728.33   61.49
  -1  15   2  675.33   64.99
   1  15  -2  754.92   65.09
   0 -15   2   42.20    8.30
   0 -15   2   48.20    6.60
   0  15   2   36.60   10.10
   0  15  -2   29.50    8.50
   1 -15   2   21.80    5.20
   1  15   2   14.20   10.50
   1  15   2   21.80    3.70
  -1  15  -2   10.60    7.30
   2  15   2  685.43   61.69
   2  15   2  642.04   54.49
  -2  15  -2  626.34   58.59
   3  15   2  288.17   24.40
   3  15   2  268.97   36.40
  -3  15  -2  274.57   29.50
  -4 -15  -2   -1.60    5.20
  -4  15  -2   -7.30    6.60
   4  15   2    9.20   11.50
  -5 -15  -2   44.90    9.80
  -5  15  -2   28.70   10.80
   5  15   2   12.20   15.50
  -6 -15  -2   36.80    9.60
  -6  15  -2    8.60   11.10
   6  15   2   18.90   15.60
   7  15   2  251.27   38.40
  -7  15  -2  125.39   24.10
  -8  15  -2   51.89   17.40
   8  15   2   95.39   28.30
   9  15   2   47.50   23.50
  -9  15  -2   31.80   16.40
  10  16  -2   21.60   22.50
 -10  16   2   20.50   13.40
  -9  16   2   81.99   21.80
   9  16  -2  113.79   30.90
  -8 -16   2   49.30   12.50
  -8  16   2   18.90   12.40
   8  16  -2   17.70   18.50
  -7 -16   2   45.00   11.80
  -7  16   2   36.70   14.00
   7  16  -2   24.60   18.50
  -6 -16   2    1.80    6.90
   6  16  -2   14.50   14.60
  -6  16   2    5.50    9.20
  -5 -16   2  444.86   41.60
   5  16  -2  346.17   48.10
  -5  16   2  468.35   44.00
  -4 -16   2 1022.50   93.89
  -4  16   2 1098.09   95.69
   4  16  -2 1106.09   98.19
  -3 -16   2   71.09   11.80
   3  16  -2   52.29   13.10
  -3  16   2   47.70   11.40
  -2 -16   2    3.00    2.00
  -2 -16   2    3.50    5.00
   2  16  -2    7.20    7.90
  -2  16   2    2.20    5.90
  -1 -16   2   67.99    7.80
  -1 -16   2   64.89   10.80
   1  16  -2   58.79   12.30
  -1  16   2   74.69   13.30
   0 -16   2 1212.08  101.99
   0 -16   2 1205.38  103.39
   0  16  -2 1229.08  104.69
   0  16   2 1156.28  105.49
   1  16   2 1529.55  127.09
   1  16   2 1467.15  132.19
  -1  16  -2 1526.55  130.39
  -2  16  -2   51.09   11.20
   2  16   2   34.60   13.10
   2  16   2   69.19    6.40
   3  16   2    5.00   11.90
  -3  16  -2   10.10    8.10
   3  16   2    2.00    2.60
  -4 -16  -2  244.88   24.30
  -4  16  -2  199.88   27.30
   4  16   2  211.28   32.60
  -5 -16  -2  270.97   28.50
  -5  16  -2  291.87   34.40
   5  16   2  253.77   38.30
  -6 -16  -2  291.37   31.40
   6  16   2  319.27   45.60
  -6  16  -2  320.77   38.30
   7  16   2   40.10   21.00
  -7  16  -2   24.60   12.70
  -8  16  -2   14.90   13.30
   8  16   2    5.70   16.70
   9  16   2   59.49   25.40
  -9  16  -2   80.49   19.60
 -10  17   2   16.50   12.50
  10  17  -2   27.90   24.10
   9  17  -2   19.80   20.40
  -9  17   2   28.00   13.50
  -8 -17   2   -0.20    7.90
  -8  17   2   19.10   12.70
   8  17  -2   36.10   20.40
  -7 -17   2   62.39   13.50
   7  17  -2   31.30   18.20
  -7  17   2   55.39   15.80
  -6 -17   2   68.09   13.60
   6  17  -2   59.49   20.50
  -6  17   2   44.60   13.90
  -5 -17   2  291.77   30.10
   5  17  -2  244.38   36.70
  -5  17   2  304.47   35.30
  -4 -17   2    2.30    5.60
  -4  17   2    9.40    8.00
   4  17  -2    3.10    9.00
  -3 -17   2   12.70    7.10
   3  17  -2    4.10    9.50
  -3  17   2   11.10    8.40
  -2 -17   2  198.98   22.30
  -2  17   2  163.58   22.10
   2  17  -2  199.68   24.40
  -1 -17   2  406.86   36.30
  -1 -17   2  366.46   33.20
  -1  17   2  370.76   37.80
   1  17  -2  399.46   37.70
   0 -17   2  102.79   13.50
   0  17  -2   87.29   14.40
   0  17   2   85.89   16.20
   1  17   2  107.39   10.60
   1  17   2  106.19   18.60
  -1  17  -2  112.79   15.60
   2  17   2   -0.40   10.40
  -2  17  -2    7.70    7.90
   2  17   2   -1.00    1.60
  -3  17  -2  200.08   26.30
   3  17   2  281.47   33.80
  -4  17  -2   44.70   11.90
   4  17   2   44.60   17.60
  -5 -17  -2    1.40    6.30
  -5  17  -2   -8.80    7.00
   5  17   2  -13.70   12.00
  -6 -17  -2   20.80    8.60
   6  17   2    2.10   14.10
  -6  17  -2   16.40   10.80
  -7  17  -2  120.19   23.20
   7  17   2   91.59   26.50
   8  17   2   23.20   19.70
  -8  17  -2  103.29   20.70
  -9  17  -2    0.50   11.40
   9  17   2   -0.70   18.10
 -10  18   2    8.70   12.70
  10  18  -2    1.80   21.60
   9  18  -2   18.40   21.60
  -9  18   2   27.60   14.90
  -8 -18   2   35.80   11.80
  -8  18   2    5.90   11.20
   8  18  -2    6.70   18.10
  -7 -18   2   -8.00    6.70
  -7  18   2    0.90    8.20
   7  18  -2    6.70   15.80
  -6 -18   2    0.60    7.20
  -6  18   2   -5.70    8.00
   6  18  -2    4.70   12.60
  -5 -18   2  -10.50    5.90
   5  18  -2    1.60   11.00
  -5  18   2    6.60    8.60
  -4 -18   2   62.79   12.20
   4  18  -2   95.19   18.60
  -4  18   2   72.39   14.50
  -3 -18   2   63.29   11.50
  -3  18   2   70.19   12.80
   3  18  -2   42.40   13.20
  -2 -18   2   11.60    6.30
   2  18  -2   -0.40    8.50
  -2  18   2    6.80    6.80
  -1 -18   2   35.00    8.30
  -1  18   2   37.40    9.90
   1  18  -2   13.30    8.90
   0 -18   2   18.30    6.30
   0  18   2   18.30    9.30
   0  18  -2   14.50    8.30
   1  18   2  512.95   43.40
   1  18   2  488.55   49.50
  -1  18  -2  502.45   47.20
   2  18   2  133.99   22.10
  -2  18  -2  166.48   20.90
   2  18   2  138.19   12.70
   3  18   2   -7.70    9.50
  -3  18  -2    5.50    7.30
  -4  18  -2    8.60    9.10
   4  18   2   23.90   13.70
  -5 -18  -2   -4.50    5.80
  -5  18  -2   -3.70    7.30
   5  18   2   -0.40   12.60
  -6 -18  -2  -11.80    6.10
  -6  18  -2   24.90   12.00
   6  18   2   16.80   16.80
  -7  18  -2    0.00    9.80
   7  18   2    5.60   16.20
   8  18   2   -1.50   16.50
  -8  18  -2    8.70   12.10
  -9  18  -2   12.50   11.80
   9  18   2  -11.10   18.70
  -9  19   2    3.20   12.50
   9  19  -2   11.10   20.40
  -8 -19   2   18.20    9.80
  -8  19   2   -9.40    9.90
   8  19  -2  -11.30   15.20
  -7 -19   2   65.79   14.20
   7  19  -2  102.29   24.10
  -7  19   2   40.10   14.10
  -6 -19   2   20.00    9.10
  -6  19   2   17.70   11.50
   6  19  -2   37.40   17.10
  -5 -19   2    0.40    7.20
   5  19  -2    1.50   11.80
  -5  19   2    2.20    9.40
  -4 -19   2   12.50    7.50
   4  19  -2   10.90   11.80
  -4  19   2    4.10    8.30
  -3 -19   2   17.10    7.30
   3  19  -2   -0.80    9.30
  -3  19   2   20.50    8.60
  -2 -19   2   18.10    8.00
  -2  19   2   26.60    9.60
   2  19  -2   15.30   10.10
  -1 -19   2   20.80    7.10
  -1  19   2   32.40    9.80
   1  19  -2   24.90    9.40
   0 -19   2   14.70    6.70
   0  19  -2   28.40    8.90
   0  19   2   18.50   10.00
   1  19   2   17.50    3.70
  -1  19  -2   26.00    9.60
   1  19   2   39.30   12.70
  -2  19  -2  624.34   54.29
   2  19   2  590.64   57.59
   2  19   2  553.14   48.50
  -3  19  -2   30.50   10.40
   3  19   2   67.49   16.70
  -4  19  -2   27.90   11.60
   4  19   2   33.20   14.70
  -5  19  -2   23.40   10.30
   5  19   2   27.60   16.80
  -6 -19  -2   -1.30    7.20
   6  19   2    1.10   16.00
  -6  19  -2  -10.80    7.10
  -7  19  -2    6.40   11.90
   7  19   2   20.00   17.60
  -8  19  -2   15.60   12.80
   8  19   2   -1.70   16.00
   9  19   2   10.00   20.60
  -9  19  -2   15.80   12.00
  -9  20   2   91.59   21.50
   9  20  -2   70.99   28.80
  -8 -20   2  108.39   19.50
   8  20  -2   79.09   26.70
  -8  20   2   97.09   22.00
  -7 -20   2   -1.80    6.60
  -7  20   2   -4.20    9.80
   7  20  -2    9.90   14.60
  -6 -20   2   -6.50    6.90
  -6  20   2    1.80    8.80
   6  20  -2  -25.50    8.30
  -5 -20   2  192.58   24.20
  -5  20   2  208.18   26.20
   5  20  -2  125.29   25.80
  -4 -20   2  304.87   29.00
   4  20  -2  237.48   35.00
  -4  20   2  214.28   29.90
  -3 -20   2   42.70   10.50
   3  20  -2   54.49   14.50
  -3  20   2   36.50   11.10
  -2 -20   2   40.30   10.30
  -2  20   2   45.70   11.20
   2  20  -2   53.69   14.00
  -1 -20   2  150.58   19.40
   1  20  -2  146.19   21.00
  -1  20   2  166.78   22.70
   0 -20   2  373.76   37.40
   0  20  -2  418.16   39.50
   0  20   2  416.66   40.90
  -1  20  -2   80.59   15.00
   1  20   2   88.89    9.50
   1  20   2   73.29   16.60
  -2  20  -2    3.90    6.90
   2  20   2   14.10   10.90
  -3  20  -2    9.00    7.90
   3  20   2   -0.40   11.10
  -4  20  -2   36.80   11.90
   4  20   2   28.10   15.20
  -5  20  -2  130.29   22.50
   5  20   2  142.29   29.80
  -6  20  -2   33.30   14.30
   6  20   2   39.30   20.50
   7  20   2   -1.30   14.00
  -7  20  -2    4.70   11.00
   8  20   2   -1.10   15.10
  -8  20  -2    1.60    9.70
   9  20   2   40.70   27.90
  -9  20  -2   84.89   20.60
  -9  21   2   -4.30    9.50
   9  21  -2   28.50   22.10
  -8 -21   2   13.30   10.00
  -8  21   2   -5.90    9.50
   8  21  -2    5.00   16.80
  -7 -21   2   33.70   11.90
  -7  21   2   42.80   14.60
   7  21  -2   13.20   17.50
  -6 -21   2  226.48   27.40
   6  21  -2  139.39   30.10
  -6  21   2  187.68   28.20
  -5 -21   2  115.89   19.20
  -5  21   2  146.29   22.50
   5  21  -2   78.69   21.40
  -4 -21   2    1.90    7.00
   4  21  -2    5.50   12.00
  -4  21   2   -2.10    8.00
  -3 -21   2  102.09   16.80
   3  21  -2  159.28   23.80
  -3  21   2   98.19   17.90
  -2 -21   2  403.96   38.30
  -2  21   2  378.66   39.30
   2  21  -2  379.96   40.50
  -1 -21   2   48.50   11.20
   1  21  -2   89.99   16.00
  -1  21   2   46.10   12.60
   0 -21   2  232.18   24.00
   0  21   2  281.17   31.30
   0  21  -2  182.38   26.40
   1  21   2   54.29    6.80
   1  21   2   62.19   16.00
  -1  21  -2   42.70   11.10
   2  21   2  602.64   64.29
  -2  21  -2  709.03   61.89
   3  21   2   59.19   19.20
  -3  21  -2   61.99   14.50
   4  21   2   57.49   18.70
  -4  21  -2   60.99   14.60
  -5  21  -2  -11.00    6.80
   5  21   2    7.70   14.70
  -6  21  -2   17.50   11.30
   6  21   2   36.20   20.10
   7  21   2   20.70   18.10
  -7  21  -2   41.50   14.80
   8  21   2    7.30   19.40
  -8  21  -2    9.70   11.70
  -9  21  -2   11.50   13.90
   9  21   2   17.60   18.90
  -9  22   2   50.29   18.20
   9  22  -2   67.49   28.20
  -8 -22   2   15.00   10.90
  -8  22   2   47.20   15.70
   8  22  -2   26.40   19.90
  -7 -22   2   25.90   11.00
   7  22  -2   14.80   17.60
  -7  22   2   20.50   12.90
  -6 -22   2    8.50    8.50
   6  22  -2   14.30   16.90
  -6  22   2   11.40   10.90
  -5 -22   2  106.19   19.50
   5  22  -2  144.19   27.60
  -5  22   2  150.78   24.10
  -4 -22   2  253.97   31.80
   4  22  -2  261.17   37.30
  -4  22   2  322.07   35.60
  -3 -22   2   14.60    8.30
  -3  22   2   48.20   11.70
   3  22  -2   37.70   13.70
  -2 -22   2   99.39   15.30
   2  22  -2   75.39   16.20
  -2  22   2   56.99   13.30
  -1 -22   2   66.99   12.00
  -1  22   2   72.29   14.80
   1  22  -2   43.90   12.70
   0 -22   2   44.20   10.20
   0  22  -2   50.79   12.50
   0  22   2   23.30   10.80
   1  22   2  117.79   11.80
   1  22   2  100.99   21.40
  -1  22  -2  131.09   19.00
   2  22   2   12.50   12.00
  -2  22  -2    4.90    8.90
  -3  22  -2   62.39   14.20
   3  22   2   54.49   17.50
   4  22   2   22.30   16.70
  -4  22  -2   10.80    9.90
  -5  22  -2   31.90   12.90
   5  22   2   36.60   17.30
   6  22   2   24.20   19.00
  -6  22  -2   17.50   12.40
   7  22   2    1.80   16.90
  -7  22  -2   21.80   12.90
  -8  22  -2   14.90   12.30
   8  22   2   10.30   18.30
  -9  22  -2   55.89   19.00
   9  22   2   42.40   26.80
  -9  23   2   -9.10   10.10
   9  23  -2    6.60   20.60
  -8 -23   2    0.80    8.90
   8  23  -2   21.40   19.20
  -8  23   2   -3.50    9.80
  -7 -23   2   38.30   12.80
  -7  23   2   24.80   13.80
   7  23  -2   38.10   19.60
  -6 -23   2   -4.10    7.90
  -6  23   2    2.10   10.50
   6  23  -2   12.90   15.30
  -5 -23   2   38.20   12.00
   5  23  -2   33.00   16.70
  -5  23   2   58.19   15.10
  -4 -23   2   -2.90    6.00
   4  23  -2   -1.20   10.20
  -4  23   2   20.40   10.50
  -3 -23   2   -6.80    5.70
  -3  23   2   -0.40    7.10
   3  23  -2    8.20   10.60
  -2 -23   2  157.98   22.00
  -2  23   2  176.48   24.30
   2  23  -2  200.18   26.80
  -1 -23   2   69.79   13.50
   1  23  -2   70.29   15.70
  -1  23   2  106.79   17.30
   0  23   2   11.40    9.60
   0  23  -2   17.40    9.40
   1  23   2   10.10    3.60
   1  23   2   30.70   12.60
  -1  23  -2   17.70    9.60
  -2  23  -2   55.29   13.50
   2  23   2   41.60   15.00
   3  23   2   38.60   16.20
  -3  23  -2   50.79   13.60
  -4  23  -2    1.50    8.80
   4  23   2   33.80   15.40
   5  23   2   -7.30   12.00
  -5  23  -2    1.30    9.20
  -6  23  -2    1.40   11.20
   6  23   2  -15.00   12.90
  -7  23  -2   -8.80    8.30
   7  23   2   38.70   20.50
  -8  23  -2   17.70   12.60
   8  23   2   -4.40   15.80
   9  23   2  -10.30   16.00
  -9  23  -2   13.80   15.40
  -9  24   2   -6.80   10.90
   9  24  -2   20.50   22.40
  -8 -24   2   -4.60    8.40
   8  24  -2   -6.60   17.20
  -8  24   2  -11.00    8.40
  -7 -24   2   -1.40    7.90
   7  24  -2   -4.40   13.80
  -7  24   2   18.50   12.60
  -6 -24   2    0.50    7.60
  -6  24   2   -8.60    9.90
   6  24  -2  -18.70   12.00
  -5 -24   2    9.80    8.80
   5  24  -2  -11.20   12.00
  -5  24   2   13.00   10.70
  -4 -24   2    2.40    7.10
  -4  24   2    8.10    9.60
   4  24  -2   10.60   13.60
  -3 -24   2   63.19   13.40
  -3  24   2   96.79   17.30
   3  24  -2   52.09   16.50
  -2 -24   2    4.60    7.30
   2  24  -2  -20.30    8.30
  -2  24   2    9.40    8.60
  -1 -24   2  147.39   21.50
  -1  24   2  223.98   27.40
   1  24  -2  192.68   26.50
   0  24   2   53.89   15.70
   0  24  -2   66.19   14.70
  -1  24  -2   24.70   10.10
   1  24   2   31.70   13.60
   1  24   2   14.30    4.80
  -2  24  -2    9.30    8.60
   2  24   2  -12.40   11.00
  -3  24  -2   34.80   11.00
   3  24   2   30.90   16.70
  -4  24  -2   29.30   12.00
   4  24   2   14.70   15.80
   5  24   2   19.90   17.50
  -5  24  -2   -2.40    9.20
  -6  24  -2   26.10   12.60
   6  24   2   14.10   19.90
  -7  24  -2   -8.00    9.60
   7  24   2   12.50   16.30
  -8  24  -2    6.70   10.70
   8  24   2   18.80   20.30
   9  25  -2   17.20   23.10
  -9  25   2   -0.30   11.40
  -8 -25   2   11.20   11.00
   8  25  -2   29.00   19.50
  -8  25   2   15.50   11.70
  -7 -25   2   -6.10    8.60
   7  25  -2   20.40   18.90
  -7  25   2   17.10   12.50
  -6 -25   2   58.09   15.00
   6  25  -2  106.69   25.90
  -6  25   2   58.29   17.70
  -5 -25   2  228.78   30.20
  -5  25   2  229.38   32.20
   5  25  -2  225.98   36.90
  -4 -25   2  -11.20    7.00
   4  25  -2    3.10   13.50
  -4  25   2   13.40    9.40
  -3 -25   2   22.30    9.50
  -3  25   2   23.70   10.40
   3  25  -2    4.10   11.10
  -2 -25   2    1.80    6.70
  -2  25   2   -0.10    8.40
   2  25  -2   21.80   12.80
  -1 -25   2  293.07   31.50
   1  25  -2  328.07   36.80
  -1  25   2  278.17   35.90
   0  25  -2   10.40    8.60
   0  25   2   -4.20    8.90
  -1  25  -2  195.88   26.30
   1  25   2  222.88   32.10
  -2  25  -2  110.59   19.00
   2  25   2   82.59   20.60
   3  25   2   -5.60   12.80
  -3  25  -2   14.20    9.10
  -4  25  -2    9.70   10.60
   4  25   2   -2.30   12.30
   5  25   2   -8.70   12.80
  -5  25  -2   16.20   12.00
  -6  25  -2   20.50   12.10
   6  25   2    8.10   15.50
  -7  25  -2   97.09   21.80
   7  25   2  109.29   31.40
   8  25   2   55.49   26.10
  -8  25  -2   34.80   16.20
   9  26  -2   50.49   25.90
  -9  26   2   76.19   21.70
  -8 -26   2   39.90   13.80
  -8  26   2   22.80   15.20
   8  26  -2   51.69   23.90
  -7 -26   2   29.90   12.40
   7  26  -2   14.10   19.20
  -7  26   2   17.60   13.00
  -6 -26   2   -5.80    8.50
   6  26  -2   24.40   17.90
  -6  26   2    9.10   11.50
  -5 -26   2  112.29   19.60
   5  26  -2   90.99   24.10
  -5  26   2  126.99   22.50
  -4 -26   2  171.68   22.10
  -4  26   2  107.19   20.40
   4  26  -2  115.09   24.40
  -3 -26   2  246.78   32.10
  -3  26   2  290.57   35.90
   3  26  -2  332.77   40.70
  -2 -26   2   38.90   11.70
  -2  26   2   72.89   16.50
   2  26  -2   51.39   16.20
  -1 -26   2   76.89   15.10
  -1  26   2   66.49   17.60
   1  26  -2  105.09   19.00
   0  26  -2  234.08   32.70
   0  26   2  329.47   37.70
  -1  26  -2  290.07   36.30
   1  26   2  332.97   42.40
   2  26   2  105.09   24.00
  -2  26  -2  130.09   21.00
  -3  26  -2   11.40    9.60
   3  26   2   -1.20   12.70
   4  26   2    5.20   14.00
  -4  26  -2    1.10    9.60
   5  26   2  225.58   36.10
  -5  26  -2  159.28   26.90
   6  26   2  132.59   31.60
  -6  26  -2   83.79   19.70
  -7  26  -2    8.20   10.70
   7  26   2   -1.80   16.50
   8  26   2    3.90   18.80
  -8  26  -2   10.90   14.00
  -8 -27   2   11.70   10.30
   8  27  -2    7.40   18.10
  -8  27   2    9.20   13.80
  -7 -27   2   36.30   12.10
   7  27  -2   43.10   21.10
  -7  27   2   32.60   14.00
  -6 -27   2   65.49   15.70
  -6  27   2   36.40   14.30
   6  27  -2   32.50   18.60
  -5 -27   2  138.49   22.10
  -5  27   2  116.19   22.20
   5  27  -2  114.79   26.80
  -4 -27   2    4.10    8.70
  -4  27   2    0.30    9.20
   4  27  -2   -7.30   11.10
  -3 -27   2   67.09   15.10
   3  27  -2   46.50   17.60
  -3  27   2   49.20   13.80
  -2 -27   2   38.50   11.60
   2  27  -2   34.50   15.50
  -2  27   2   26.10   12.20
  -1 -27   2  167.98   23.20
  -1  27   2  184.08   26.80
   1  27  -2  160.38   26.10
   0  27   2   49.99   15.70
   0  27  -2   76.89   16.80
   1  27   2   36.00   15.90
  -1  27  -2   13.80   10.80
  -2  27  -2  239.28   32.00
   2  27   2  312.27   39.80
  -3  27  -2    9.00    9.90
   3  27   2   29.90   16.00
   4  27   2   50.69   19.00
  -4  27  -2   18.00   11.30
   5  27   2  -11.80   14.20
  -5  27  -2    4.40    9.90
   6  27   2   38.00   20.40
  -6  27  -2   46.80   15.40
   7  27   2   78.29   26.30
  -7  27  -2   81.99   20.00
   8  27   2   92.99   31.10
  -8  27  -2  137.39   27.60
  -8 -28   2   12.70    9.90
  -8  28   2    0.80   10.20
   8  28  -2   10.30   19.80
  -7 -28   2    4.90   10.80
  -7  28   2   -3.70   11.60
   7  28  -2   -6.40   16.40
  -6 -28   2    8.10    9.40
  -6  28   2   24.70   12.30
   6  28  -2  -11.10   15.20
  -5 -28   2   19.10   10.90
   5  28  -2   21.00   17.40
  -5  28   2   43.60   14.00
  -4 -28   2   46.40   12.50
  -4  28   2   42.50   14.20
   4  28  -2   27.40   16.60
  -3 -28   2   65.19   14.70
  -3  28   2   53.29   14.40
   3  28  -2  102.39   22.30
  -2 -28   2    6.10    9.40
  -2  28   2   29.10   12.80
   2  28  -2   32.90   15.50
  -1  28   2   22.90   13.00
   1  28  -2   48.20   15.00
   0  28  -2   31.20   12.70
   0  28   2   36.50   14.20
  -1  28  -2  119.29   20.70
   1  28   2   81.49   20.60
  -2  28  -2   55.29   15.20
   2  28   2   52.09   17.60
  -3  28  -2   -9.30    7.00
   3  28   2  -19.80   13.10
   4  28   2    0.80   14.30
  -4  28  -2   32.50   12.00
   5  28   2   37.10   20.40
  -5  28  -2   35.60   14.90
   6  28   2   31.10   19.00
  -6  28  -2   41.90   15.20
   7  28   2  -11.80   18.20
  -7  28  -2   -9.90    9.00
  -8  28  -2   -6.40   10.90
   8  28   2   52.29   26.00
  -8 -29   2   -2.50   10.10
   8  29  -2   10.20   20.50
  -8  29   2   16.20   15.10
  -7 -29   2   14.80   11.60
   7  29  -2    8.40   19.50
  -7  29   2   13.10   13.10
  -6 -29   2    1.80   10.10
  -6  29   2    0.50   10.70
   6  29  -2   -0.60   16.90
  -5 -29   2   -6.70    7.10
   5  29  -2    0.00   14.70
  -5  29   2   -7.80    9.50
  -4 -29   2   16.70    9.90
   4  29  -2    6.40   14.30
  -4  29   2   -5.90    9.50
  -3 -29   2    5.60    8.50
   3  29  -2    0.70   11.60
  -3  29   2   -3.30    9.50
  -2 -29   2   14.20    9.70
  -2  29   2   -4.40   10.00
   2  29  -2   33.90   15.40
  -1  29   2   37.20   13.40
   1  29  -2    1.70   11.40
   0  29   2  -16.10    8.40
   0  29  -2    5.70   11.40
   1  29   2    8.60   13.60
  -1  29  -2   14.50   11.50
  -2  29  -2   15.10   10.40
   2  29   2    0.70   12.50
  -3  29  -2    7.50   10.10
   3  29   2   10.50   14.50
  -4  29  -2   14.90   11.30
   4  29   2    5.70   14.30
  -5  29  -2    2.20   10.10
   5  29   2   29.20   19.30
  -6  29  -2   18.50   12.50
   6  29   2    5.50   15.50
   7  29   2  -11.00   17.70
  -7  29  -2    9.40   12.70
   8  29   2   23.20   20.20
  -8  29  -2   -6.00   11.30
  -8 -30   2   45.10   15.70
  -8  30   2   26.10   16.50
   8  30  -2   20.30   21.20
  -7 -30   2   -4.30    9.80
  -7  30   2   -7.50    9.70
   7  30  -2    2.70   20.00
  -6 -30   2   21.60   12.50
  -6  30   2   31.60   14.50
   6  30  -2    5.20   17.10
  -5 -30   2   21.60   11.80
   5  30  -2    9.60   16.30
  -5  30   2   -5.30    9.90
  -4 -30   2   73.79   16.80
  -4  30   2   50.89   15.30
   4  30  -2   53.29   19.80
  -3 -30   2   49.40   14.30
   3  30  -2   69.49   20.70
  -3  30   2   56.59   15.90
  -2 -30   2   30.20   12.20
  -2  30   2   34.10   13.50
   2  30  -2   35.70   15.10
   1  30  -2   -2.90    9.10
  -1  30   2    2.50   12.40
   0  30   2   14.70   12.70
   0  30  -2   21.00   12.80
   1  30   2   16.80   14.10
  -1  30  -2   15.30   12.00
   2  30   2    0.40   12.20
  -2  30  -2   37.50   13.70
   3  30   2   -3.20   15.70
  -3  30  -2   13.70   11.10
   4  30   2   45.00   21.80
  -4  30  -2   53.79   17.00
   5  30   2   22.70   21.00
  -5  30  -2   44.60   16.00
  -6  30  -2   15.50   12.70
   6  30   2   -4.90   15.60
   7  30   2   -0.30   19.50
  -7  30  -2   10.10   13.60
  -8 -31   2   14.20   12.50
   8  31  -2   27.90   19.80
  -8  31   2   18.80   14.70
  -7 -31   2   18.50   11.50
  -7  31   2    7.20   13.00
   7  31  -2    0.90   20.80
  -6 -31   2    9.90   11.10
   6  31  -2   12.50   18.90
  -6  31   2   19.90   12.60
  -5 -31   2   24.90   12.80
  -5  31   2   12.00   11.30
   5  31  -2   36.60   17.80
  -4 -31   2   -4.00    8.20
   4  31  -2   -4.50   14.00
  -4  31   2   12.30   11.00
  -3 -31   2   35.10   13.30
  -3  31   2   53.99   15.10
   3  31  -2   55.19   20.10
  -2 -31   2   63.29   15.00
   2  31  -2   78.79   20.20
  -2  31   2   50.29   15.40
   1  31  -2  152.88   26.80
  -1  31   2  179.68   28.70
   0  31   2    5.90   12.30
   0  31  -2    8.10   12.50
   1  31   2   16.20   13.90
  -1  31  -2   27.70   13.00
   2  31   2   27.30   16.20
  -2  31  -2   52.09   14.70
   3  31   2   21.60   17.60
  -3  31  -2   15.00   11.10
  -4  31  -2   24.90   14.00
   4  31   2   62.49   22.20
  -5  31  -2   -9.00   10.60
   5  31   2   24.90   18.60
  -6  31  -2   17.00   14.30
   6  31   2    4.50   17.50
  -7  31  -2   45.50   17.20
   7  31   2   22.60   22.90
  -7 -32   2   -2.00    8.60
  -7  32   2   -2.00    9.80
   7  32  -2    2.20   18.90
  -6 -32   2    2.70   10.80
  -6  32   2    3.30   12.20
   6  32  -2   27.20   21.10
  -5 -32   2    9.00   10.80
  -5  32   2   26.00   13.90
   5  32  -2   17.70   16.90
  -4 -32   2   27.10   12.50
   4  32  -2   15.40   16.60
  -4  32   2   29.50   13.80
  -3 -32   2   82.59   18.00
  -3  32   2   58.09   16.60
   3  32  -2   89.69   23.10
   2  32  -2  -19.40    9.50
  -2  32   2    4.50    9.80
   1  32  -2   29.90   14.30
  -1  32   2   30.50   14.20
   0  32  -2   64.99   19.50
   0  32   2   96.59   23.20
   1  32   2   16.70   16.90
  -1  32  -2    3.50   12.00
  -2  32  -2   60.19   16.60
   2  32   2   65.29   20.20
   3  32   2   31.70   17.50
  -3  32  -2   18.70   13.10
   4  32   2   52.39   23.00
  -4  32  -2    7.70   11.30
   5  32   2   90.69   28.40
  -5  32  -2  166.78   27.90
  -6  32  -2   38.40   16.70
   6  32   2   46.50   23.70
   7  32   2   24.10   23.50
  -7  32  -2    9.80   12.20
  -7 -33   2  -15.90    7.80
  -7  33   2   -0.90   12.10
   7  33  -2  -15.90   19.20
  -6 -33   2  -13.20    7.40
   6  33  -2   28.40   19.00
  -6  33   2    8.90   11.40
  -5 -33   2    4.20   10.30
   5  33  -2   -0.50   16.10
  -5  33   2   11.10   12.60
  -4 -33   2    9.90   10.20
   4  33  -2   16.80   16.60
  -4  33   2   12.40   11.40
  -3 -33   2   57.69   15.50
   3  33  -2   74.89   22.80
  -3  33   2   92.59   20.00
   2  33  -2  -25.40   12.40
  -2  33   2   -1.00   11.30
   1  33  -2   -1.90   10.80
  -1  33   2   10.40   14.20
   0  33  -2   14.60   11.60
   0  33   2   10.10   14.10
   1  33   2   -0.10   15.70
  -1  33  -2    1.60   10.90
  -2  33  -2   39.70   15.50
   2  33   2   35.20   17.90
   3  33   2   32.60   18.10
  -3  33  -2   19.60   12.20
  -4  33  -2   -4.50   10.40
   4  33   2  -15.40   13.30
  -5  33  -2   -9.90    9.00
   5  33   2   16.70   20.90
   6  33   2   17.40   23.20
  -6  33  -2   13.00   12.10
   7  33   2   19.30   24.30
  -7  33  -2   10.90   15.30
  -7 -34   2    7.00   12.00
  -7  34   2   -2.10   10.50
   7  34  -2   -4.40   17.80
  -6 -34   2   -1.60    9.70
  -6  34   2  -13.20   11.00
   6  34  -2  -25.80   15.90
  -5 -34   2   13.90    9.80
  -5  34   2  -12.90    8.80
   5  34  -2   34.20   19.60
  -4 -34   2   15.30   11.40
   4  34  -2    7.20   15.70
  -4  34   2   -7.50    9.70
   3  34  -2   -3.00   15.30
  -3  34   2   -4.00    8.30
  -2  34   2   -2.60   11.30
   2  34  -2    5.10   14.00
   1  34  -2   -7.60   10.90
  -1  34   2    4.90   12.20
   0  34  -2   11.10   12.70
   0  34   2    0.50   13.40
  -1  34  -2   32.40   15.00
   1  34   2   27.00   16.60
   2  34   2  -15.60   13.90
  -2  34  -2    4.80   12.40
  -3  34  -2   25.40   14.50
   3  34   2    9.20   17.50
  -4  34  -2  -16.80   10.00
   4  34   2  -19.30   15.40
  -5  34  -2   -8.40   10.70
   5  34   2   12.20   17.40
   6  34   2   16.50   20.40
  -6  34  -2   -2.90   10.60
  -7 -35   2    8.20   12.00
   7  35  -2   11.20   21.80
  -7  35   2   35.80   17.30
  -6 -35   2   19.60   11.60
  -6  35   2   -1.80   10.80
   6  35  -2    7.00   18.70
  -5 -35   2  -20.10    7.00
  -5  35   2   -8.60   10.10
   5  35  -2    4.20   18.60
  -4 -35   2   -5.30   10.30
  -4  35   2   -9.90    9.80
   4  35  -2  -14.90   11.90
  -3  35   2    7.30   10.80
   3  35  -2   25.70   18.30
  -2  35   2   28.90   14.60
   2  35  -2   33.40   18.70
  -1  35   2    6.70   13.60
   1  35  -2   15.20   14.30
   0  35  -2    9.60   12.90
   0  35   2   12.20   14.50
  -1  35  -2   10.30   13.40
   1  35   2   12.20   16.00
  -2  35  -2   27.60   14.70
   2  35   2    9.30   15.80
  -3  35  -2   -0.80   10.70
   3  35   2   15.00   19.10
   4  35   2   -1.20   17.90
  -4  35  -2   -2.50   10.40
  -5  35  -2    1.60   12.80
   5  35   2   17.10   22.00
  -6  35  -2  -11.40   11.50
   6  35   2   27.10   20.80
  -6 -36   2   11.40   11.10
   6  36  -2   10.00   18.90
  -6  36   2   -6.40   10.00
  -5 -36   2   48.40   15.30
   5  36  -2   35.20   21.90
  -5  36   2   65.59   19.00
  -4  36   2   22.40   15.00
   4  36  -2   48.30   21.10
   3  36  -2   -2.00   13.90
  -3  36   2   -7.70    9.80
  -2  36   2    7.10   11.40
   2  36  -2   11.20   15.00
  -1  36   2   -0.20   11.50
   1  36  -2    4.50   11.50
   0  36  -2  133.19   28.40
   0  36   2  215.38   33.80
   1  36   2  103.49   26.50
  -1  36  -2  171.58   27.60
   2  36   2   48.80   19.80
  -2  36  -2   75.99   18.40
   3  36   2   12.40   18.50
  -3  36  -2    2.10   12.00
  -4  36  -2    7.90   12.60
   4  36   2   -2.50   16.30
   5  36   2   28.40   20.50
  -5  36  -2   23.40   14.10
  -6  36  -2    8.30   12.60
   6  36   2    8.90   20.50
  -6 -37   2   56.49   17.60
   6  37  -2  100.19   30.60
  -6  37   2   61.49   20.50
   5  37  -2   -0.10   15.60
  -5  37   2   -3.40   10.20
   4  37  -2  -11.60   15.40
  -4  37   2   -6.40    9.20
   3  37  -2   52.19   21.90
  -3  37   2   16.90   12.90
   2  37  -2   42.10   19.80
  -2  37   2   35.10   18.30
  -1  37   2   80.19   21.60
   1  37  -2   76.69   20.80
   0  37   2   11.20   14.40
   0  37  -2    2.20   12.20
   1  37   2   21.90   16.30
  -1  37  -2   -4.10   11.40
   2  37   2   81.19   26.00
  -2  37  -2  109.79   22.70
   3  37   2   92.79   27.30
  -3  37  -2   42.20   17.60
  -4  37  -2    6.40   12.80
   4  37   2   27.80   21.00
  -5  37  -2   -9.00   11.90
   5  37   2   -1.60   18.60
  -6  37  -2   35.20   16.90
   6  37   2   14.90   21.60
  -6  38   2    3.00   13.10
   6  38  -2   13.60   21.60
  -5  38   2   20.50   13.90
   5  38  -2   55.69   23.90
   4  38  -2   19.50   18.80
  -4  38   2   17.10   13.60
  -3  38   2    0.80   10.70
   3  38  -2   19.60   19.90
  -2  38   2   -7.40   12.40
   2  38  -2   18.90   17.70
   1  38  -2   63.89   20.20
  -1  38   2   60.59   21.10
   0  38  -2   87.39   23.20
   0  38   2   47.70   19.40
   1  38   2   16.60   16.90
  -1  38  -2   15.30   15.60
  -2  38  -2   19.10   13.60
   2  38   2   35.20   19.40
  -3  38  -2   -9.80    9.70
   3  38   2  -20.90   14.90
   4  38   2  -10.20   15.90
  -4  38  -2   12.40   12.90
  -5  38  -2   24.90   14.50
   5  38   2   35.90   24.30
  -5  39   2   10.40   12.30
   5  39  -2    0.00   19.60
   4  39  -2    0.70   15.80
  -4  39   2   18.40   12.80
   3  39  -2    7.50   14.30
  -3  39   2    1.10   11.10
  -2  39   2   12.40   14.00
   2  39  -2   -2.30   14.60
   1  39  -2   -3.80   13.60
  -1  39   2  -13.40   10.90
   0  39   2   46.40   18.10
   0  39  -2   -4.20   12.20
  -1  39  -2   -2.50   14.70
   1  39   2   -6.90   15.10
  -2  39  -2   -7.20   10.30
   2  39   2   -3.10   18.00
  -3  39  -2    0.90   11.50
   3  39   2  -18.60   14.30
   4  39   2   -6.00   17.40
  -4  39  -2  -14.60   11.70
  -5  39  -2    0.80   12.50
   5  39   2  -13.10   20.00
  -5  40   2   42.70   18.90
   5  40  -2   -5.00   18.50
  -4  40   2    6.60   10.50
   4  40  -2    5.80   17.80
   3  40  -2   -7.40   17.50
  -3  40   2    2.60   12.90
  -2  40   2   -5.20   14.00
   2  40  -2   12.70   18.00
   1  40  -2   30.60   18.10
  -1  40   2   -3.20   15.00
   0  40   2    3.50   14.90
   0  40  -2   -1.20   14.70
   1  40   2    4.00   17.40
  -1  40  -2   27.50   15.90
  -2  40  -2    2.90   12.60
   2  40   2    2.10   16.80
   3  40   2   13.40   18.80
  -3  40  -2   24.90   15.10
  -4  40  -2   -8.20   11.40
   4  40   2   -4.80   17.70
  -5  40  -2    1.10   16.00
   5  40   2   33.70   26.60
  -4  41   2    5.50   12.20
   4  41  -2   35.90   21.10
  -3  41   2   -4.70   13.00
   3  41  -2   15.10   17.70
  -2  41   2   57.29   19.30
   2  41  -2   90.19   25.20
   1  41  -2   21.60   18.70
  -1  41   2   14.10   15.20
   0  41  -2    3.00   15.30
   0  41   2   -6.00   14.30
   1  41   2    7.80   15.90
  -1  41  -2    7.10   15.30
  -2  41  -2    7.70   13.10
   2  41   2    5.30   20.10
  -3  41  -2   32.80   18.00
   3  41   2   34.00   21.90
   4  41   2    8.90   19.20
  -4  41  -2    7.40   13.30
  -4  42   2   57.69   20.20
   4  42  -2   57.29   24.40
  -3  42   2   25.20   16.60
   3  42  -2   14.40   21.10
  -2  42   2   17.80   16.10
   2  42  -2  -17.80   15.00
  -1  42   2   24.20   17.10
   1  42  -2   15.00   17.80
   0  42   2   23.30   18.70
   0  42  -2   27.80   17.80
   1  42   2   70.59   23.70
  -1  42  -2   68.99   22.90
  -2  42  -2    9.20   14.60
   2  42   2   21.30   19.80
   3  42   2  -21.40   14.80
  -3  42  -2    6.50   15.60
  -4  42  -2   -4.10   14.10
   4  42   2   41.10   29.90
  -3  43   2  -11.60   12.70
   3  43  -2   15.30   18.00
   2  43  -2   33.30   21.10
  -2  43   2    1.10   14.50
   1  43  -2   22.60   19.80
  -1  43   2   26.90   19.50
   0  43  -2    2.60   15.90
   0  43   2   14.80   18.90
  -1  43  -2   13.30   14.70
   1  43   2  -18.80   12.20
  -2  43  -2   37.40   18.40
   2  43   2   27.10   22.40
   3  43   2   -4.10   22.20
  -3  43  -2   15.20   15.60
   3  44  -2   14.60   20.90
   2  44  -2   10.60   17.50
  -2  44   2  -20.70    9.80
  -1  44   2  -16.30   13.00
   1  44  -2   22.30   19.90
   0  44  -2  -20.50   13.20
   0  44   2   -1.10   16.60
  -1  44  -2   -9.20   12.70
   1  44   2  -16.10   14.70
  -2  44  -2   -7.10   14.20
   2  44   2   22.60   22.30
   2  45  -2   17.50   17.80
  -1  45   2  -21.40   14.10
   1  45  -2    1.00   17.10
   0  45  -2   -4.20   16.80
   0  45   2   11.90   19.40
   1  45   2   28.10   21.60
  -1  45  -2   -3.80   16.00
  10   0  -3   -7.10   17.00
   9   0  -3  -21.80   11.90
   8   0  -3   -2.70   15.20
   7   0  -3  -12.00   12.20
   6   0  -3    3.40   11.60
   5   0  -3   15.40   10.60
   4   0  -3   -3.70    8.00
   3   0  -3    2.60    7.50
  -2   0   3    4.00    2.80
   2   0  -3    3.00    5.50
  -1   0   3    4.80    2.70
  -1   0   3   -3.10    1.90
   0   0   3   -4.10    2.40
   0   0   3   -3.70    4.30
   1   0   3    1.80    7.10
   1   0   3    2.90    3.10
   2   0   3    2.90    8.00
   2   0   3    4.20    3.20
   3   0   3    2.40    9.50
   3   0   3   -2.90    2.90
   4   0   3    0.30    3.50
   4   0   3    5.00   10.90
   5   0   3    4.10    4.70
   5   0   3   16.20   13.40
   6   0   3   12.80   13.80
   7   0   3   13.30   14.00
   8   0   3   10.00   17.90
   9   0   3   -9.20   15.10
  10   0   3  -12.90   15.50
  10  -1  -3    3.90   18.80
  10   1  -3    0.10   17.00
   9  -1  -3   79.19   24.70
   9   1  -3   78.39   24.40
   8  -1  -3   23.70   16.10
   8   1  -3   23.80   17.50
  -7  -1   3   25.50    8.20
   7  -1  -3   55.79   19.20
   7   1  -3   53.09   18.10
   6  -1  -3   -5.40   11.00
   6   1  -3    6.80   12.10
   5  -1  -3   11.50   10.90
   5   1  -3   12.90   10.50
   4  -1  -3  504.45   48.00
   4   1  -3  478.05   47.40
   3  -1  -3  471.25   43.00
   3   1  -3  446.56   42.80
  -2  -1   3   47.40    6.40
  -2   1   3   49.90    6.70
   2   1  -3   69.59    9.50
  -2   1   3   60.59    7.20
  -1  -1   3    8.00    3.10
  -1   1   3    9.80    2.80
  -1   1   3   11.80    3.30
   0  -1   3  642.64   55.19
   0  -1   3  618.54   54.69
   0   1   3  661.33   54.69
   0   1   3  654.83   55.49
   1  -1   3  311.37   30.90
   1  -1   3  326.67   27.80
   1   1   3  303.87   27.60
   1   1   3  322.97   30.80
   2  -1   3  148.29   20.20
   2  -1   3  153.58   14.20
   2   1   3  108.69   18.60
   2   1   3  146.69   14.10
   3  -1   3   15.40   11.30
   3  -1   3    5.60    4.20
   3   1   3    5.50   10.00
   3   1   3    3.30    3.80
   4  -1   3  126.49   14.60
   4  -1   3  112.89   21.70
   4   1   3  133.69   14.60
   4   1   3  120.99   22.50
   5  -1   3   65.79    9.80
   5  -1   3   54.19   16.70
   5   1   3   35.20   16.60
   5   1   3   58.59    9.10
   6  -1   3   64.19   19.30
   6   1   3   44.00   17.70
   7  -1   3    0.80   12.40
   7   1   3  -12.30   11.40
   8  -1   3   29.40   20.20
   8   1   3  -13.60   15.70
   9  -1   3   31.30   21.60
   9   1   3    9.20   18.70
  10  -1   3   31.60   22.70
  10   1   3    2.10   19.70
  10  -2  -3    3.50   20.10
  10   2  -3   51.09   24.50
   9  -2  -3   23.10   17.60
   9   2  -3   41.30   21.50
   8  -2  -3    0.20   15.40
   8   2  -3    4.60   15.40
  -7  -2   3    3.20    5.10
   7  -2  -3   16.70   14.00
   7   2  -3   14.50   12.10
   6  -2  -3  347.47   41.10
   6   2  -3  272.77   37.80
   5  -2  -3  163.78   23.00
   5   2  -3   82.79   17.70
   4  -2  -3  358.46   38.20
   4   2  -3  399.06   38.70
  -3  -2   3  624.14   52.49
   3  -2  -3  601.04   55.49
   3   2  -3  597.74   55.49
  -2  -2   3  350.36   30.10
  -2   2   3  348.57   30.70
   2   2  -3  328.47   31.60
  -2   2   3  347.97   30.30
  -1  -2   3  442.26   37.70
  -1   2   3  426.76   37.80
  -1   2   3  448.96   37.80
   0  -2   3  600.34   50.69
   0  -2   3  589.34   51.09
   0   2   3  600.54   51.59
   0   2   3  589.14   50.59
   1  -2   3  710.93   59.39
   1  -2   3  663.93   56.89
   1   2   3  651.13   56.69
   1   2   3  656.33   59.49
   2  -2   3  126.39   21.70
   2  -2   3  190.08   17.70
   2   2   3  197.98   17.40
   2   2   3  224.98   25.20
   3  -2   3  615.74   60.59
   3  -2   3  628.04   55.19
   3   2   3  633.54   60.69
   3   2   3  654.73   54.99
   4  -2   3  102.19   19.70
   4  -2   3  100.59   12.20
   4   2   3   95.49   11.50
   4   2   3   79.39   18.40
   5  -2   3   -7.20   10.10
   5  -2   3   -7.90    3.80
   5   2   3   -2.50   10.10
   5   2   3    3.60    4.10
   6  -2   3   53.09   18.20
   6   2   3   30.80   15.20
   7  -2   3   21.80   15.50
   7   2   3   55.09   20.30
   8  -2   3  219.58   41.60
   8   2   3  280.07   43.70
   9  -2   3   16.00   19.00
   9   2   3   32.90   22.80
  10  -2   3  -13.60   14.40
  10   2   3   -5.70   16.80
  10   3  -3   23.60   21.30
   9  -3  -3  186.98   35.70
   9   3  -3  195.98   37.90
   8  -3  -3   87.99   24.60
   8   3  -3  122.09   27.10
  -7  -3   3   53.99   11.20
   7  -3  -3   81.99   21.20
   7   3  -3   44.50   16.70
   6  -3  -3   80.39   19.80
  -6  -3   3   93.09   13.70
   6   3  -3   62.99   17.60
   5  -3  -3   22.30   12.30
   5   3  -3   19.30   11.40
   4  -3  -3 1414.66  124.49
   4   3  -3 1433.96  124.79
  -3  -3   3 2170.28  185.08
  -3   3   3 2285.57  186.08
   3   3  -3 2160.78  187.78
  -2  -3   3    2.60    2.40
   2   3  -3    2.40    5.80
  -2   3   3   -9.10    3.30
  -1  -3   3 1076.89   94.49
   1   3  -3 1138.89   94.39
  -1   3   3 1141.29   94.79
  -1   3   3 1138.79   94.69
   0  -3   3   27.40    4.90
   0   3  -3   39.10    4.80
   0   3   3   31.20    4.80
   0   3   3   39.60    7.10
   1  -3   3   99.89   10.10
   1  -3   3   96.69   13.60
   1   3   3   95.09    9.70
   1   3   3   83.69   13.40
   2  -3   3  467.85   39.40
   2  -3   3  442.76   43.10
   2   3   3  439.66   43.70
   2   3   3  440.06   38.90
   3  -3   3   15.50   10.00
   3  -3   3   23.20    5.20
   3   3   3   13.40    4.30
   3   3   3   15.60   10.50
   4  -3   3  128.79   22.60
   4  -3   3  137.29   15.20
   4   3   3  127.39   13.70
   4   3   3  137.29   24.10
   5  -3   3   -6.10   12.30
   5  -3   3   29.20    6.80
   5   3   3   18.70    5.80
   5   3   3   34.50   16.00
   6  -3   3  537.85   62.59
   6   3   3  500.75   61.19
   7  -3   3  134.99   30.10
   7   3   3  166.78   32.60
   8  -3   3  155.88   33.60
   8   3   3  159.48   34.00
   9  -3   3   54.69   24.50
   9   3   3   51.79   23.00
  10  -3   3   40.20   25.70
  10   3   3   -8.10   19.10
  10   4  -3   27.10   21.50
   9  -4  -3   14.90   17.50
   9   4  -3   40.40   21.40
   8  -4  -3   28.40   16.40
  -8  -4   3    5.80   10.80
   8   4  -3    4.80   16.20
   7  -4  -3   20.50   13.40
  -7  -4   3   24.90    8.00
   7   4  -3   18.60   15.10
  -6  -4   3  223.58   25.60
   6  -4  -3  263.27   34.50
   6   4  -3  197.18   31.20
  -5  -4   3  163.78   18.30
   5  -4  -3  141.69   22.00
   5   4  -3   96.99   20.30
   4   4  -3   70.39   15.00
  -3  -4   3  343.67   29.50
  -3   4   3  324.77   31.20
   3   4  -3  336.27   33.50
  -2  -4   3  806.72   68.39
  -2   4   3  824.52   69.49
   2   4  -3  794.02   69.89
  -1  -4   3  865.81   73.69
  -1   4   3  876.91   73.99
   1   4  -3  885.31   73.69
  -1   4   3  865.21   74.29
   0  -4   3 1531.55  129.19
   0   4   3 1547.05  130.29
   0   4  -3 1487.55  128.99
   0   4   3 1590.94  129.09
   1  -4   3  396.86   34.90
   1  -4   3  402.26   34.20
   1  -4   3  385.16   37.20
   1   4   3  389.26   37.60
   1   4   3  408.26   34.50
   2  -4   3  262.77   25.50
   2  -4   3  271.07   30.00
   2   4   3  302.17   30.80
   2   4   3  294.27   25.00
   3  -4   3   12.40   11.20
   3  -4   3   27.70    5.70
   3   4   3   16.40    4.30
   3   4   3    1.30   10.50
   4  -4   3  749.33   72.19
   4  -4   3  806.82   65.59
   4   4   3  693.43   64.49
   4   4   3  786.32   72.49
   5  -4   3   46.80   16.00
   5   4   3    8.00   12.40
   5   4   3    6.60    4.50
   6  -4   3   40.90   18.00
   6   4   3   13.20   14.60
   7  -4   3   84.09   23.20
   7   4   3   49.20   19.90
   8  -4   3   84.39   24.90
   8   4   3  107.59   29.40
   9  -4   3   23.90   19.80
   9   4   3   -5.70   16.60
  10  -4   3   33.90   21.30
  10   4   3   35.30   22.80
  10   5  -3   39.00   22.50
 -10   5   3   18.10   12.50
   9   5  -3    5.50   17.40
  -8  -5   3   41.30   10.60
   8   5  -3   34.60   18.00
  -7  -5   3   37.90    9.10
   7  -5  -3   38.50   16.00
   7   5  -3   19.10   15.30
  -6  -5   3   58.59   10.70
   6  -5  -3   43.00   15.20
   6   5  -3   31.90   16.00
  -5  -5   3   22.60    6.60
   5   5  -3   16.50   11.80
  -4  -5   3  299.57   26.80
  -4  -5   3  291.97   28.70
   4   5  -3  298.87   34.50
  -4   5   3  311.27   29.40
  -3  -5   3   18.60    3.60
   3   5  -3   23.90    8.80
  -3   5   3   22.20    6.50
  -2  -5   3   44.10    5.60
   2   5  -3   40.70    8.80
  -2   5   3   52.49    8.20
  -1  -5   3  109.59   11.30
   1   5  -3  128.79   12.10
  -1   5   3  115.99   12.70
  -1   5   3  122.99   11.80
   0  -5   3  367.76   33.00
   0  -5   3  397.06   33.50
   0   5   3  376.36   32.90
   0   5   3  397.36   34.80
   0   5  -3  371.76   33.10
   1  -5   3 3809.32  334.07
   1  -5   3 4045.70  335.87
   1  -5   3 4090.69  333.57
   1   5   3 3991.30  336.47
   1   5   3 4046.50  333.67
   2  -5   3   71.29   13.60
   2  -5   3   63.29    9.20
   2   5   3  114.79   17.40
   2   5   3   80.09    8.60
   3  -5   3  116.59   13.70
   3  -5   3  144.09   21.90
   3   5   3  163.48   22.00
   3   5   3  112.29   12.00
   4  -5   3    6.70    4.50
   4  -5   3    2.00   11.40
   4   5   3   12.80    4.30
   4   5   3   -6.60    9.30
   5  -5   3   73.29   18.10
   5   5   3   48.10   17.90
   5   5   3   39.90    7.30
   6  -5   3  128.49   26.70
   6   5   3   87.19   23.90
   7  -5   3   47.30   20.90
   7   5   3   79.39   23.30
   8  -5   3   37.40   19.20
   8   5   3   51.99   22.40
   9  -5   3   -1.00   17.20
   9   5   3   19.20   21.60
  10  -5   3   -4.00   20.30
  10   5   3   -2.90   19.70
  10   6  -3    3.20   20.20
 -10   6   3   29.10   14.80
   9   6  -3   25.10   21.10
  -9   6   3   17.40   11.80
  -8  -6   3   -3.20    5.30
   8   6  -3   -3.40   14.30
  -7  -6   3   -4.60    5.00
   7   6  -3    2.40   12.60
  -6  -6   3  139.49   18.30
   6   6  -3  127.49   25.00
  -5  -6   3   79.09   12.80
  -5   6   3   71.79   13.10
   5   6  -3   69.59   16.60
  -4  -6   3   12.10    5.50
  -4  -6   3   17.50    3.70
   4   6  -3   29.80   11.10
  -4   6   3    4.70    6.30
  -3  -6   3    6.20    5.50
  -3  -6   3    6.00    2.40
   3   6  -3   -5.70    6.90
  -3   6   3   10.10    5.20
  -2  -6   3    5.80    4.60
  -2  -6   3   11.90    2.80
  -2   6   3    2.70    4.60
   2   6  -3   15.00    6.30
  -1  -6   3  292.07   28.10
  -1  -6   3  311.17   26.90
  -1   6   3  309.67   27.30
   1   6  -3  314.77   27.60
  -1   6   3  311.87   28.30
   0  -6   3   55.69    7.30
   0  -6   3   64.59    8.40
   0   6   3   69.79   10.00
   0   6  -3   70.79    8.10
   0   6   3   54.29    6.90
   1  -6   3  247.88   24.00
   1  -6   3  261.27   23.40
   1   6   3  252.07   27.00
  -1   6  -3  278.77   25.10
   1   6   3  282.37   23.50
   2  -6   3  394.06   35.30
   2  -6   3  386.46   39.10
   2   6   3  378.76   39.70
   2   6   3  408.66   34.40
   3  -6   3  398.26   35.70
   3  -6   3  420.36   41.60
   3   6   3  406.16   34.70
   3   6   3  341.97   40.30
   4  -6   3  139.89   23.80
   4  -6   3  156.48   17.10
   4   6   3  147.59   14.90
   4   6   3  161.18   25.20
   5  -6   3   -2.30    9.90
   5   6   3    4.20    3.80
   5   6   3   11.20   14.20
   6  -6   3   26.80   15.30
   6   6   3    6.90   13.50
   7  -6   3  178.38   33.30
   7   6   3  194.58   36.20
   8  -6   3   33.40   20.10
   8   6   3   26.50   20.30
   9  -6   3   46.20   22.40
   9   6   3   25.70   20.70
  10  -6   3   31.10   24.90
  10   6   3   49.99   25.50
 -10   7   3  -11.40   10.50
  10   7  -3  -17.20   16.30
   9   7  -3  167.68   35.70
  -9   7   3  200.68   29.70
  -8  -7   3   79.99   13.50
   8   7  -3   28.30   18.10
  -8   7   3   51.29   15.00
  -7  -7   3   14.30    7.20
   7   7  -3   -1.00   11.30
  -7   7   3    6.80    7.90
  -6  -7   3    4.10    6.20
   6   7  -3   -3.00   10.80
  -6   7   3   -3.40    6.90
  -5  -7   3  281.87   25.20
  -5  -7   3  214.08   21.30
   5   7  -3  258.27   32.50
  -5   7   3  224.08   26.90
  -4  -7   3 1154.08  101.09
  -4  -7   3 1208.18   98.79
   4   7  -3 1085.09  103.49
  -4   7   3 1190.18  101.69
  -3  -7   3  304.37   28.80
  -3  -7   3  301.77   26.10
   3   7  -3  316.37   30.60
  -3   7   3  274.97   28.50
  -2  -7   3  215.88   23.10
  -2  -7   3  243.98   20.90
   2   7  -3  250.67   24.10
  -2   7   3  235.58   23.10
  -1  -7   3    0.30    2.50
  -1  -7   3   -0.20    4.10
   1   7  -3   -5.10    3.80
  -1   7   3   -0.40    4.70
  -1   7   3   -0.60    2.90
   0  -7   3  120.99   12.30
   0  -7   3  122.29   13.00
   0   7  -3  122.99   13.20
   0   7   3  131.69   12.20
   0   7   3  129.49   15.30
   1  -7   3 1008.60   84.49
   1  -7   3  982.40   83.99
   1   7   3  996.30   87.19
  -1   7  -3  992.10   85.29
   1   7   3  996.00   83.89
   2  -7   3  258.47   23.40
   2   7   3  245.28   22.30
   2   7   3  261.17   29.70
   3  -7   3   27.40   12.10
   3  -7   3   30.70    6.50
   3   7   3   36.70   12.90
   3   7   3   30.40    5.00
   4  -7   3  242.78   34.30
   4  -7   3  297.67   26.60
   4   7   3  266.47   24.80
   4   7   3  267.47   36.30
   5  -7   3  520.15   52.79
   5   7   3  461.45   57.19
   5   7   3  487.35   43.30
   6  -7   3  116.49   25.10
   6   7   3  104.89   26.60
   7  -7   3   97.69   23.90
   7   7   3   74.49   24.40
   8  -7   3   -1.20   15.00
   8   7   3    7.90   16.10
   9  -7   3   11.00   18.10
   9   7   3   30.40   24.50
  10  -7   3   18.40   19.40
  10   7   3   45.80   24.00
  10   8  -3   -4.50   19.40
 -10   8   3   17.80   14.00
  -9   8   3   10.80   11.30
   9   8  -3   -1.60   16.80
  -8  -8   3   34.40    9.90
  -8   8   3   34.70   13.40
   8   8  -3   20.00   17.50
  -7  -8   3  149.99   20.60
  -7   8   3  167.88   24.00
   7   8  -3  128.79   27.50
  -6  -8   3  681.33   65.19
   6   8  -3  810.42   72.49
  -6   8   3  716.83   67.19
  -5  -8   3  216.78   19.60
  -5  -8   3  225.88   23.10
  -5   8   3  194.18   24.90
   5   8  -3  179.38   28.10
  -4  -8   3   58.49    7.00
  -4  -8   3   61.49   10.90
   4   8  -3   68.99   14.60
  -4   8   3   57.79   11.00
  -3  -8   3  186.88   17.70
  -3  -8   3  207.58   20.60
  -3   8   3  208.58   21.00
   3   8  -3  219.08   24.50
  -2  -8   3  154.68   14.20
  -2  -8   3  139.49   17.10
  -2   8   3  168.08   17.20
   2   8  -3  167.68   18.60
  -1  -8   3   79.49    8.80
  -1  -8   3  106.59   12.20
  -1   8   3  101.19   12.40
   1   8  -3   93.89   11.00
  -1   8   3   79.79    9.60
   0  -8   3  257.97   22.40
   0  -8   3  249.18   23.10
   0   8  -3  236.48   23.00
   0   8   3  246.18   22.10
   0   8   3  258.87   25.30
   1  -8   3  822.92   68.59
   1  -8   3  788.52   68.89
   1   8   3  799.92   71.79
   1   8   3  811.72   68.19
  -1   8  -3  804.62   69.89
   2  -8   3 1016.80   87.49
   2   8   3 1009.10   91.39
  -2   8  -3 1010.50   88.69
   2   8   3 1047.10   86.49
   3  -8   3  304.37   30.20
   3  -8   3  356.66   35.80
   3   8   3  335.17   29.00
   3   8   3  341.67   40.50
   4  -8   3  205.48   29.50
   4  -8   3  196.38   19.50
   4   8   3  180.28   17.90
   4   8   3  210.48   28.90
   5  -8   3   -3.90   11.50
   5   8   3   15.80    4.50
   5   8   3    0.00   11.70
   6  -8   3  -13.40    9.80
   6   8   3   13.00   14.50
   7  -8   3  562.14   66.69
   7   8   3  482.25   65.49
   8  -8   3  194.58   35.60
   8   8   3  135.89   33.10
   9  -8   3   -3.10   15.90
   9   8   3   -9.60   14.80
  10   8   3   10.60   20.30
 -10   9   3   -1.70   10.40
  10   9  -3  -13.70   16.60
  -9   9   3   77.49   19.00
   9   9  -3   49.10   22.90
  -8  -9   3   13.30    8.00
  -8   9   3    7.20   10.90
   8   9  -3   14.30   18.30
  -7  -9   3    5.40    6.40
   7   9  -3   12.60   15.00
  -7   9   3    6.70    9.40
  -6  -9   3    9.10    6.60
  -6   9   3   14.00    8.60
   6   9  -3   21.10   15.00
  -5  -9   3   -0.80    5.60
  -5  -9   3   13.40    3.30
   5   9  -3   30.50   12.70
  -5   9   3    2.30    6.40
  -4  -9   3  338.47   33.80
  -4  -9   3  369.76   30.90
   4   9  -3  329.57   36.60
  -4   9   3  355.46   34.80
  -3  -9   3  568.34   47.00
  -3  -9   3  531.85   49.60
  -3   9   3  566.74   50.09
   3   9  -3  514.95   51.19
  -2  -9   3  191.38   19.30
  -2  -9   3  178.18   16.70
  -2   9   3  202.58   21.30
   2   9  -3  196.08   21.30
  -1  -9   3   46.00    5.80
  -1  -9   3   62.29    9.00
   1   9  -3   45.20    8.00
  -1   9   3   36.90    8.30
   0  -9   3  496.75   42.00
   0  -9   3  470.25   42.60
   0   9   3  478.25   41.70
   0   9  -3  495.15   42.90
   0   9   3  490.25   44.60
   1  -9   3 3337.67  274.07
   1  -9   3 3276.47  273.77
   1   9   3 3228.28  276.77
   1   9   3 3238.28  273.27
  -1   9  -3 3272.57  274.87
   2  -9   3  451.95   38.00
   2   9   3  414.56   36.60
  -2   9  -3  418.26   39.60
   2   9   3  419.26   42.70
   3  -9   3  193.78   19.90
   3   9   3  190.68   18.00
   3   9   3  201.88   29.00
  -3   9  -3  220.08   21.80
   4  -9   3  354.66   34.20
   4  -9   3  385.96   44.30
   4   9   3  359.06   44.30
   4   9   3  376.96   32.70
   5  -9   3  238.38   34.10
   5   9   3  153.18   29.60
   5   9   3  205.48   19.30
   6  -9   3   75.19   20.40
   6   9   3   39.80   18.30
   7  -9   3   23.20   15.80
   7   9   3  -30.60   13.10
   8  -9   3    4.80   14.70
   8   9   3   48.30   22.80
   9   9   3   11.80   19.40
 -10   9  -3  -13.70   12.70
  10   9   3  -19.60   18.30
  10  10  -3  -17.60   17.30
 -10  10   3   -9.40    8.90
  -9  10   3   34.30   14.80
   9  10  -3    5.90   18.30
  -8 -10   3   19.30    8.90
  -8  10   3   13.60   11.70
   8  10  -3  -11.20   15.00
  -7 -10   3   99.29   15.30
   7  10  -3   82.49   21.80
  -7  10   3   54.09   15.40
  -6 -10   3   81.79   14.50
   6  10  -3  125.69   23.00
  -6  10   3   98.39   17.30
  -5 -10   3   -1.80    2.10
  -5 -10   3   -7.40    4.20
   5  10  -3    7.10   10.10
  -5  10   3    4.70    6.20
  -4 -10   3    3.30    2.20
  -4 -10   3    3.70    5.90
   4  10  -3   -7.50    7.60
  -4  10   3   12.70    6.70
  -3 -10   3   62.69   10.10
  -3 -10   3   46.30    5.80
   3  10  -3   67.89   12.80
  -3  10   3   54.09   10.40
  -2 -10   3    6.30    5.70
  -2 -10   3    2.70    2.30
  -2  10   3    2.90    5.50
   2  10  -3    8.40    7.00
  -1 -10   3   -2.00    2.40
  -1 -10   3    2.90    4.90
   1  10  -3    0.20    5.20
  -1  10   3    2.30    6.10
   0 -10   3    3.30    4.40
   0 -10   3   -0.60    3.10
   0  10   3   -4.30    5.80
   0  10   3    3.00    2.80
   0  10  -3   -2.60    4.50
   1 -10   3   48.10    6.60
   1 -10   3   31.40    6.30
   1  10   3   32.60    4.80
  -1  10  -3   23.20    7.10
   1  10   3   20.70    9.70
   2 -10   3  317.17   29.30
   2  10   3  314.47   27.80
   2  10   3  348.27   34.90
  -2  10  -3  315.97   31.10
   3 -10   3   79.99   11.30
   3  10   3  102.39   18.60
   3  10   3   87.39    9.50
  -3  10  -3   96.69   14.10
   4 -10   3    1.60    4.40
   4  10   3    0.10   11.00
   4  10   3    4.90    3.00
  -4  10  -3   -7.50    5.30
   5  10   3   40.00    6.40
   5  10   3   18.30   13.40
   6 -10   3   46.20   17.60
   6  10   3   19.70   16.00
   7  10   3   25.20   19.20
   8  10   3  -12.40   14.40
   9  10   3   -7.20   19.00
  -9  10  -3   -9.30    9.40
  10  10   3   11.70   24.10
 -10  10  -3    8.00   15.30
 -10  11   3   31.30   15.60
  10  11  -3   18.20   22.60
   9  11  -3  -20.00   15.60
  -9  11   3    3.90   11.00
  -8 -11   3   10.90    8.10
   8  11  -3    5.70   16.80
  -8  11   3   15.60   10.20
  -7 -11   3    3.70    6.30
  -7  11   3   15.30    9.90
   7  11  -3   23.90   16.60
  -6 -11   3    2.70    5.60
  -6  11   3   11.70    8.90
   6  11  -3   -5.40   11.40
  -5 -11   3  313.77   27.70
  -5 -11   3  320.87   31.80
   5  11  -3  333.77   39.00
  -5  11   3  298.97   32.60
  -4 -11   3  115.19   11.30
  -4 -11   3  137.79   17.10
  -4  11   3  125.29   17.50
   4  11  -3  125.89   20.40
  -3 -11   3   87.89    8.70
  -3 -11   3  117.09   14.40
   3  11  -3   76.09   14.40
  -3  11   3   89.69   13.40
  -2 -11   3   17.00    6.80
  -2 -11   3   16.40    3.30
   2  11  -3   21.70    7.90
  -2  11   3   23.20    7.60
  -1 -11   3   19.10    5.90
  -1 -11   3    6.60    3.00
   1  11  -3   26.60    7.00
  -1  11   3   12.10    6.30
   0 -11   3  122.69   13.20
   0 -11   3  124.59   14.70
   0  11   3  145.49   13.10
   0  11   3  157.68   18.60
   0  11  -3  140.29   15.70
   1 -11   3  252.77   23.60
   1 -11   3  261.37   23.60
   1  11   3  274.87   28.30
   1  11   3  256.17   22.60
  -1  11  -3  241.48   25.00
   2 -11   3   57.29    8.20
  -2  11  -3   48.50   10.60
   2  11   3   50.39    6.20
   2  11   3   62.59   15.00
   3 -11   3   46.90    8.30
  -3  11  -3   51.19   10.80
   3  11   3   38.90   13.40
   3  11   3   47.10    6.00
   4 -11   3    4.50    5.20
   4  11   3   -2.20   10.40
   4  11   3   -0.10    2.50
  -4  11  -3  -26.40    5.50
  -5  11  -3    7.10    8.70
   5  11   3   -4.10   11.40
   6  11   3  -10.10   12.70
  -6  11  -3    6.00    7.70
  -7  11  -3   21.90   10.90
   7  11   3   61.29   21.60
  -8  11  -3   -7.50   10.30
   8  11   3    2.90   17.40
   9  11   3    8.30   19.20
  -9  11  -3  -12.80   10.80
 -10  12   3   75.79   20.00
  10  12  -3   66.39   27.00
   9  12  -3    9.90   19.60
  -9  12   3  -11.10    9.30
  -8 -12   3    9.90    7.90
  -8  12   3    2.90   10.20
   8  12  -3   11.80   17.00
  -7 -12   3   11.80    7.90
   7  12  -3   17.40   14.80
  -7  12   3   -3.20    6.50
  -6 -12   3   84.39   14.90
  -6  12   3   87.79   17.50
   6  12  -3  111.29   21.00
  -5 -12   3   84.29   13.80
  -5  12   3   66.19   13.60
   5  12  -3   67.69   17.30
  -4 -12   3    1.20    1.80
  -4 -12   3   -3.40    5.00
   4  12  -3   -5.30    8.20
  -4  12   3  -11.80    5.30
  -3 -12   3  134.69   17.80
  -3 -12   3  145.69   12.90
  -3  12   3  126.49   18.20
   3  12  -3  146.29   20.40
  -2 -12   3    6.90    5.10
  -2 -12   3    0.40    2.10
  -2  12   3    0.50    5.50
   2  12  -3   -0.30    6.70
  -1 -12   3  472.05   43.20
  -1 -12   3  459.55   41.40
   1  12  -3  509.75   43.70
  -1  12   3  505.85   44.70
   0 -12   3  416.76   35.30
   0 -12   3  379.26   34.10
   0  12   3  410.56   37.60
   0  12   3  380.96   33.90
   0  12  -3  368.96   35.70
   1 -12   3    0.60    3.80
   1 -12   3    2.60    4.00
   1  12   3    3.00    2.50
  -1  12  -3    0.80    4.90
   1  12   3    8.30    8.70
   2 -12   3  459.85   39.60
   2  12   3  450.95   44.80
   2  12   3  423.56   37.80
  -2  12  -3  452.35   41.60
   3 -12   3   99.19   13.10
   3  12   3  104.19   10.60
  -3  12  -3  151.28   18.30
   3  12   3  106.39   19.60
   4  12   3  240.18   35.00
   4  12   3  264.07   24.00
  -4  12  -3  307.97   32.80
   5  12   3   10.20   13.60
  -5  12  -3   15.50    9.10
   6  12   3   -6.50   12.90
  -6  12  -3   22.90   10.90
   7  12   3  111.49   27.00
  -7  12  -3   59.09   17.00
  -8  12  -3   18.90   13.60
   8  12   3   21.40   19.70
  -9  12  -3   10.10   14.90
   9  12   3   10.90   20.00
  10  13  -3   -2.60   19.20
 -10  13   3   15.00   12.90
   9  13  -3   99.09   28.50
  -9  13   3   88.09   21.10
  -8 -13   3  192.68   25.50
  -8  13   3  167.68   27.90
   8  13  -3  219.98   38.50
  -7 -13   3   19.00    9.10
  -7  13   3   40.90   12.80
   7  13  -3   26.20   17.60
  -6 -13   3   16.50    7.90
   6  13  -3   17.60   14.50
  -6  13   3   -8.30    7.60
  -5 -13   3  247.78   25.90
   5  13  -3  237.48   32.90
  -5  13   3  229.58   28.80
  -4 -13   3  272.57   24.40
  -4 -13   3  269.97   28.40
  -4  13   3  289.27   29.70
   4  13  -3  349.07   33.40
  -3 -13   3  144.09   13.20
  -3 -13   3  171.98   19.40
  -3  13   3  127.09   18.50
   3  13  -3  154.48   20.80
  -2 -13   3   46.10    5.40
  -2 -13   3   50.29    9.60
   2  13  -3   32.60    9.60
  -2  13   3   35.10    9.30
  -1 -13   3  166.48   17.40
  -1 -13   3  120.79   12.80
  -1  13   3  142.39   18.20
   1  13  -3  146.19   17.20
   0 -13   3 1125.49   93.99
   0 -13   3 1129.59   94.89
   0  13   3 1105.69   96.99
   0  13   3 1101.49   93.59
   0  13  -3 1066.99   95.29
   1 -13   3 1162.38   98.29
   1 -13   3 1133.69   98.29
   1  13   3 1168.78   97.29
   1  13   3 1138.89  101.99
  -1  13  -3 1157.68   99.79
   2 -13   3 1200.58  103.09
   2  13   3 1211.28  101.49
  -2  13  -3 1237.88  104.89
   2  13   3 1161.58  107.39
   3 -13   3    2.50    4.00
  -3  13  -3   11.10    7.40
   3  13   3  -15.40    9.20
   3  13   3    2.40    2.30
   4  13   3   74.89   19.10
   4  13   3   85.39    9.20
  -4  13  -3   67.79   15.00
   5  13   3  278.17   40.60
  -5  13  -3  311.37   36.70
   6  13   3   10.20   15.80
  -6  13  -3   35.40   12.60
  -7  13  -3   94.09   19.90
   7  13   3   43.60   22.00
   8  13   3  -16.30   15.90
  -8  13  -3    2.20   10.10
   9  13   3   45.70   23.20
  -9  13  -3   44.80   18.30
  10  14  -3   53.99   25.00
 -10  14   3   51.49   17.50
  -9  14   3   16.50   12.40
   9  14  -3   -1.70   18.70
  -8 -14   3    5.50    7.90
  -8  14   3   -3.30    8.80
   8  14  -3  -10.40   14.60
  -7 -14   3   53.59   12.70
  -7  14   3   42.30   13.20
   7  14  -3   98.59   24.80
  -6 -14   3  287.67   34.60
   6  14  -3  286.37   40.60
  -6  14   3  358.46   35.60
  -5 -14   3   75.19   13.70
   5  14  -3   77.49   18.30
  -5  14   3   64.79   13.60
  -4 -14   3  114.59   16.10
  -4 -14   3  115.99   10.90
  -4  14   3  121.39   17.50
   4  14  -3   81.89   18.30
  -3 -14   3   46.00   10.20
  -3 -14   3   67.19    6.60
   3  14  -3   74.09   15.20
  -3  14   3   70.49   12.90
  -2 -14   3  229.28   23.00
  -2 -14   3  222.58   19.90
  -2  14   3  222.68   24.10
   2  14  -3  229.18   25.90
  -1 -14   3  209.48   19.10
  -1 -14   3  163.58   15.90
  -1  14   3  170.28   21.00
   1  14  -3  155.38   19.70
   0 -14   3  257.37   24.80
   0 -14   3  271.87   23.60
   0  14   3  239.88   23.10
   0  14   3  276.87   28.10
   0  14  -3  249.68   25.50
   1 -14   3   77.09   10.10
   1 -14   3   74.79   10.10
   1  14   3   71.49   15.20
  -1  14  -3   72.69   12.50
   1  14   3   75.19    8.30
   2 -14   3 1173.48  105.69
   2  14   3 1244.08  104.09
   2  14   3 1216.28  110.39
  -2  14  -3 1323.07  107.89
   3 -14   3  215.08   22.50
   3  14   3  242.18   32.00
  -3  14  -3  224.68   27.00
   3  14   3  232.98   20.30
  -4  14  -3   17.80    9.10
   4  14   3   18.20   12.90
  -5  14  -3  159.98   22.80
   5  14   3   82.39   21.60
  -6  14  -3   81.99   17.50
   6  14   3   56.09   19.40
  -7  14  -3  143.29   24.00
   7  14   3   87.79   26.20
   8  14   3   55.09   23.30
  -8  14  -3  100.89   21.20
  -9  14  -3   18.10   13.40
   9  14   3   41.70   24.50
 -10  15   3   23.90   14.40
  10  15  -3  -16.10   18.20
  -9  15   3   60.29   18.10
   9  15  -3   46.80   23.00
  -8 -15   3  117.29   19.00
  -8  15   3   86.39   19.90
   8  15  -3   72.19   23.50
  -7 -15   3   10.30    7.80
   7  15  -3   -7.20   14.10
  -7  15   3   -4.50    8.30
  -6 -15   3   18.20    8.20
  -6  15   3   14.80    8.40
   6  15  -3  -23.60   10.20
  -5 -15   3   34.70   10.20
   5  15  -3   21.60   13.60
  -5  15   3   25.20    9.80
  -4 -15   3    3.10    5.90
   4  15  -3    2.70    9.80
  -4  15   3   12.70    7.40
  -3 -15   3    4.60    6.30
  -3 -15   3    5.30    2.00
   3  15  -3   13.50    8.80
  -3  15   3   -0.40    6.80
  -2 -15   3  112.09   11.80
  -2 -15   3  136.79   16.50
  -2  15   3  160.18   18.80
   2  15  -3  158.08   19.30
  -1 -15   3  198.58   19.20
  -1 -15   3  182.38   16.80
  -1  15   3  207.88   23.10
   1  15  -3  130.19   19.90
   0 -15   3  223.08   20.10
   0 -15   3  201.38   21.10
   0  15   3  215.18   25.80
   0  15   3  219.08   19.80
   0  15  -3  203.58   22.30
   1 -15   3   73.89   10.30
   1 -15   3   88.69   10.50
  -1  15  -3   63.49   11.40
   1  15   3   72.19    8.30
   1  15   3   73.59   15.40
   2 -15   3   25.90    6.30
   2  15   3   25.90    4.20
   2  15   3   44.70   12.60
  -2  15  -3   31.80    8.70
   3 -15   3   -5.50    4.20
   3  15   3    5.00   10.50
  -3  15  -3    9.00    7.40
   3  15   3   12.30    2.80
   4  15   3   14.00   13.00
  -4  15  -3    8.50    8.90
   5  15   3  110.19   24.70
  -5  15  -3   45.50   13.60
  -6  15  -3   66.29   16.50
   6  15   3   33.20   18.50
   7  15   3   19.10   18.10
  -7  15  -3   16.40   12.20
  -8  15  -3   -2.40   11.90
   8  15   3    4.00   16.00
  -9  15  -3   48.50   18.20
   9  15   3    8.10   20.90
 -10  16   3    7.80   13.90
  10  16  -3   -0.10   20.20
  -9  16   3   10.60   11.80
   9  16  -3  -17.30   17.00
  -8 -16   3   75.39   15.90
   8  16  -3   87.49   26.10
  -8  16   3   74.79   18.90
  -7 -16   3    4.30    7.90
   7  16  -3    4.50   14.90
  -7  16   3   -5.60    7.60
  -6 -16   3    1.40    7.00
   6  16  -3  -12.10   11.00
  -6  16   3  -15.30    8.20
  -5 -16   3   42.80   10.20
  -5  16   3   26.90   10.20
   5  16  -3   38.50   15.90
  -4 -16   3   93.19   14.00
  -4  16   3   83.09   15.20
   4  16  -3   56.69   16.10
  -3 -16   3   12.70    2.70
  -3 -16   3   26.70    7.90
   3  16  -3   30.50   11.00
  -3  16   3   11.00    7.10
  -2 -16   3   45.60    5.80
  -2 -16   3   55.19   10.10
   2  16  -3   65.79   12.50
  -2  16   3   33.10    9.60
  -1 -16   3    1.20    5.40
  -1 -16   3    7.50    3.10
  -1  16   3    6.40    7.90
   1  16  -3    6.30    6.50
   0 -16   3    2.20    3.30
   0 -16   3    9.50    5.40
   0  16   3   -1.40    2.80
   0  16  -3    4.60    6.00
   0  16   3   -2.00    8.10
   1 -16   3    4.80    4.10
   1 -16   3    0.90    4.30
   1  16   3   -9.70    6.90
  -1  16  -3   -4.20    5.70
   1  16   3    2.90    2.50
   2 -16   3  235.98   23.20
   2  16   3  244.08   31.20
  -2  16  -3  247.98   26.00
   2  16   3  237.48   21.10
   3  16   3   14.50    3.00
   3  16   3    2.30   11.40
  -3  16  -3   18.10    8.20
  -4  16  -3  243.58   29.40
   4  16   3  228.98   34.00
   5  16   3   32.10   16.10
  -5  16  -3   23.00   11.00
  -6  16  -3    2.80   10.30
   6  16   3   -2.90   14.60
   7  16   3   26.70   19.50
  -7  16  -3   21.60   13.20
  -8  16  -3   12.60   13.50
   8  16   3   -7.40   14.40
   9  16   3    3.50   21.70
  -9  16  -3   17.70   14.70
 -10  17   3   62.29   19.90
  10  17  -3  104.29   31.80
  -9  17   3   12.20   11.90
   9  17  -3    4.90   18.90
  -8 -17   3   46.50   12.80
  -8  17   3   78.29   18.90
   8  17  -3   44.00   21.40
  -7 -17   3   73.99   15.50
  -7  17   3   57.19   15.90
   7  17  -3   41.70   18.90
  -6 -17   3   39.30   11.50
   6  17  -3   88.69   20.90
  -6  17   3   28.30   11.60
  -5 -17   3  143.89   19.90
   5  17  -3  112.29   23.30
  -5  17   3  141.99   22.00
  -4 -17   3   17.10    8.50
   4  17  -3   36.60   13.00
  -4  17   3   31.20   10.40
  -3 -17   3  237.28   20.40
  -3 -17   3  236.48   27.10
  -3  17   3  211.28   26.60
   3  17  -3  236.58   30.10
  -2 -17   3    7.10    2.90
  -2 -17   3    9.60    6.50
   2  17  -3   22.70    9.30
  -2  17   3   21.50    8.90
  -1 -17   3   19.70    4.10
  -1 -17   3   15.20    6.80
   1  17  -3    7.60    7.50
  -1  17   3   11.00    7.70
   0 -17   3  503.05   45.40
   0 -17   3  522.05   43.90
   0  17   3  477.15   48.20
   0  17  -3  502.45   46.50
   0  17   3  483.65   43.50
   1 -17   3  407.26   35.80
   1 -17   3  418.36   36.60
  -1  17  -3  380.06   37.60
   1  17   3  389.16   34.50
   1  17   3  371.66   40.70
   2 -17   3  623.24   55.19
  -2  17  -3  607.34   57.29
   2  17   3  633.64   60.79
   2  17   3  631.04   53.19
  -3  17  -3   34.40   10.80
   3  17   3   21.90   12.90
  -4  17  -3    9.10    9.30
   4  17   3    3.00   10.60
  -5  17  -3   37.40   12.40
   5  17   3   23.30   15.70
   6  17   3   18.20   17.70
  -6  17  -3   50.09   14.80
  -7  17  -3    8.40   10.70
   7  17   3  -11.30   12.30
  -8  17  -3   34.50   15.80
   8  17   3  -12.80   15.30
  -9  17  -3   15.80   12.60
   9  17   3   29.80   22.60
  10  18  -3   79.39   30.50
 -10  18   3   85.19   21.60
  -9  18   3   14.60   11.60
   9  18  -3   18.00   21.10
  -8 -18   3   40.70   12.80
  -8  18   3   35.70   14.70
   8  18  -3   16.20   20.50
  -7 -18   3  171.98   23.10
  -7  18   3  120.79   23.40
   7  18  -3  106.09   27.60
  -6 -18   3  112.59   19.20
  -6  18   3  139.89   22.80
   6  18  -3  151.48   28.50
  -5 -18   3  229.58   25.90
  -5  18   3  201.28   26.50
   5  18  -3  163.88   28.40
  -4 -18   3   -2.50    5.10
  -4  18   3    1.50    7.40
   4  18  -3    9.30   11.10
  -3 -18   3  118.49   17.80
  -3  18   3  153.68   20.30
   3  18  -3  129.09   20.70
  -2 -18   3   62.99    6.60
  -2 -18   3   48.60   10.20
   2  18  -3   33.50   11.20
  -2  18   3   29.80    9.90
  -1 -18   3  395.16   35.00
  -1 -18   3  400.06   37.60
   1  18  -3  418.86   39.10
  -1  18   3  383.36   39.40
   0 -18   3  324.27   29.10
   0 -18   3  303.57   27.20
   0  18   3  276.97   26.60
   0  18   3  308.77   35.10
   0  18  -3  283.07   30.10
   1 -18   3   18.60    6.80
   1 -18   3   23.10    5.90
   1  18   3   28.90    4.70
  -1  18  -3   18.80    8.70
   1  18   3   19.90   11.10
   2 -18   3  387.56   36.70
   2  18   3  407.96   34.40
   2  18   3  393.66   42.40
  -2  18  -3  389.56   39.20
  -3  18  -3  328.17   34.30
   3  18   3  316.47   41.30
  -4  18  -3  188.98   25.30
   4  18   3  154.48   28.00
  -5  18  -3    4.50    8.70
   5  18   3   14.50   13.90
   6  18   3    1.80   12.60
  -6  18  -3   -0.70   10.50
  -7  18  -3   55.99   17.80
   7  18   3   44.00   19.90
  -8  18  -3  110.49   24.00
   8  18   3  114.29   30.00
  -9  18  -3   -5.20   10.30
   9  18   3   12.90   21.60
  -9  19   3   50.49   16.70
   9  19  -3   59.39   24.90
  -8 -19   3  126.09   20.40
   8  19  -3   71.29   24.90
  -8  19   3  126.29   23.70
  -7 -19   3   29.70   11.30
  -7  19   3   33.20   13.20
   7  19  -3  -18.70   14.60
  -6 -19   3  -11.20    6.80
  -6  19   3   10.40    9.50
   6  19  -3   -6.30   12.10
  -5 -19   3  298.67   31.70
  -5  19   3  212.28   30.70
   5  19  -3  235.48   35.00
  -4 -19   3  193.58   22.30
   4  19  -3  139.49   23.50
  -4  19   3  117.19   20.10
  -3 -19   3  314.47   31.30
   3  19  -3  305.87   36.20
  -3  19   3  302.27   32.10
  -2 -19   3    1.10    5.80
  -2 -19   3    3.60    2.50
   2  19  -3   -0.20    7.80
  -2  19   3    3.20    6.40
  -1 -19   3    9.60    3.80
  -1 -19   3   15.10    7.30
   1  19  -3    8.90    7.90
  -1  19   3   34.00   10.90
   0 -19   3  283.27   27.40
   0 -19   3  283.87   25.70
   0  19   3  322.37   34.70
   0  19   3  268.37   25.30
   0  19  -3  258.27   28.90
   1 -19   3  114.09   14.80
   1 -19   3  119.79   14.00
  -1  19  -3  110.59   16.10
   1  19   3  110.89   11.40
   1  19   3  126.99   21.40
  -2  19  -3  373.56   39.10
   2  19   3  398.96   34.00
   2  19   3  401.66   42.50
   3  19   3   78.29   18.90
  -3  19  -3   36.20   11.00
   4  19   3  -11.50   11.20
  -4  19  -3   23.60   10.60
   5  19   3   41.80   18.90
  -5  19  -3   10.90   10.80
  -6  19  -3   53.59   15.60
   6  19   3   53.49   20.20
  -7  19  -3   23.90   13.90
   7  19   3   46.00   20.20
   8  19   3   13.80   18.60
  -8  19  -3   25.80   15.10
  -9  19  -3   17.60   14.30
   9  19   3   19.80   21.80
  -9  20   3   13.60   12.60
   9  20  -3   14.70   21.00
  -8 -20   3   14.90   10.10
   8  20  -3   -1.20   15.80
  -8  20   3   27.10   14.00
  -7 -20   3   31.90   11.60
  -7  20   3    2.00   10.10
   7  20  -3   25.00   18.00
  -6 -20   3   49.20   12.80
  -6  20   3   51.99   13.70
   6  20  -3   32.00   17.40
  -5 -20   3  101.19   16.70
   5  20  -3   94.39   21.50
  -5  20   3   58.49   15.80
  -4 -20   3   12.70    7.40
   4  20  -3   -6.50   10.30
  -4  20   3   23.00    9.90
  -3 -20   3  141.59   18.60
   3  20  -3   96.39   18.40
  -3  20   3  105.99   17.80
  -2 -20   3    5.00    2.70
  -2 -20   3   -6.20    5.10
   2  20  -3   -1.70    8.20
  -2  20   3    0.00    6.90
  -1 -20   3   24.30    8.30
  -1 -20   3   57.69    7.00
   1  20  -3   38.90   11.00
  -1  20   3   38.80   12.00
   0 -20   3  276.67   25.40
   0 -20   3  266.27   27.20
   0  20   3  275.97   33.80
   0  20   3  270.27   25.00
   0  20  -3  282.97   29.20
   1 -20   3   -0.60    4.30
   1  20   3    5.40    9.10
  -1  20  -3   -0.70    7.20
   1  20   3    2.70    2.80
  -2  20  -3  151.88   20.80
   2  20   3  151.18   14.60
   2  20   3  139.79   23.80
   3  20   3   -1.80   10.10
  -3  20  -3   -1.10    7.60
   4  20   3   41.70   17.80
  -4  20  -3   23.60   11.70
  -5  20  -3   16.30   10.90
   5  20   3   -4.40   13.30
   6  20   3   -1.60   12.80
  -6  20  -3   -6.40    9.80
  -7  20  -3   -8.60    8.00
   7  20   3  -12.20   13.00
   8  20   3   15.50   18.00
  -8  20  -3   21.40   14.00
   9  20   3   -0.10   22.20
  -9  20  -3   18.20   14.00
  -9  21   3   -4.40   12.00
   9  21  -3    1.50   20.20
  -8 -21   3  -13.90    6.80
   8  21  -3   13.10   17.50
  -8  21   3   29.40   13.20
  -7 -21   3   17.20    9.20
  -7  21   3    4.40   10.50
   7  21  -3   26.10   17.10
  -6 -21   3   80.99   16.30
   6  21  -3   62.99   20.30
  -6  21   3   54.59   15.30
  -5 -21   3   -7.10    7.00
   5  21  -3    4.20   13.40
  -5  21   3   -4.30    7.30
  -4 -21   3    3.50    7.30
  -4  21   3    1.50    8.00
   4  21  -3  -23.40    8.60
  -3 -21   3    2.20    6.50
   3  21  -3   16.90   11.30
  -3  21   3    2.50    7.00
  -2 -21   3  112.39   17.30
  -2 -21   3  109.99   11.30
   2  21  -3  138.89   20.60
  -2  21   3  112.19   19.00
  -1 -21   3   -2.50    5.30
  -1 -21   3   -3.20    2.90
  -1  21   3   -0.60    7.30
   1  21  -3   11.90    8.50
   0 -21   3   58.79    8.70
   0 -21   3   64.09   11.30
   0  21   3   63.29    8.50
   0  21   3   63.89   14.40
   0  21  -3   47.40   12.10
   1  21   3   87.19    9.80
  -1  21  -3   97.89   16.00
   1  21   3   72.89   16.60
  -2  21  -3    9.20    8.10
   2  21   3   12.90   12.40
   3  21   3   11.40   11.90
  -3  21  -3   20.50    9.80
  -4  21  -3   12.80    9.30
   4  21   3   -0.70   11.90
   5  21   3   19.00   15.60
  -5  21  -3   17.10   10.80
  -6  21  -3   -2.00    9.00
   6  21   3   -1.30   13.50
   7  21   3   -5.90   13.80
  -7  21  -3   -4.80    9.10
  -8  21  -3    5.20   11.90
   8  21   3    8.10   19.00
   9  21   3   16.40   23.70
  -9  21  -3    4.20   13.10
  -9  22   3  -14.40   10.30
   9  22  -3   12.70   21.30
  -8 -22   3    0.90    9.00
  -8  22   3    1.70   10.40
   8  22  -3   10.70   17.20
  -7 -22   3   18.90   10.20
   7  22  -3   -4.70   14.70
  -7  22   3   16.00   11.00
  -6 -22   3   41.00   12.50
   6  22  -3   41.40   18.60
  -6  22   3   25.60   12.50
  -5 -22   3  233.98   27.30
   5  22  -3  248.08   34.40
  -5  22   3  134.69   25.40
  -4 -22   3   54.79   13.20
  -4  22   3   56.19   13.50
   4  22  -3   53.49   16.70
  -3 -22   3   62.89   13.50
   3  22  -3   73.29   17.00
  -3  22   3   99.59   17.60
  -2 -22   3   25.20    9.20
  -2  22   3   18.60   10.60
   2  22  -3   30.20   11.50
  -1 -22   3   47.80   10.50
   1  22  -3   49.40   12.40
  -1  22   3   56.19   13.90
   0 -22   3   20.70    7.70
   0  22   3    1.60    8.80
   0  22   3   13.20    4.30
   0  22  -3   34.00   10.40
   1  22   3    1.70    8.60
   1  22   3    0.30    2.60
  -1  22  -3    1.90    6.70
   2  22   3   68.29   18.80
  -2  22  -3   89.29   15.10
   3  22   3   93.19   21.50
  -3  22  -3   86.29   16.50
   4  22   3    5.60   13.00
  -4  22  -3    6.00    8.60
  -5  22  -3   10.10   11.00
   5  22   3   -2.30   13.60
   6  22   3   37.00   21.60
  -6  22  -3   75.09   18.20
  -7  22  -3   68.69   18.30
   7  22   3  -15.70   16.30
  -8  22  -3    6.90   13.30
   8  22   3    3.30   18.90
   9  22   3   12.70   24.50
   9  23  -3    1.00   20.90
  -9  23   3   23.60   13.70
  -8 -23   3   50.69   14.60
   8  23  -3    2.30   16.70
  -8  23   3   17.80   11.50
  -7 -23   3  121.69   21.60
  -7  23   3  119.69   23.70
   7  23  -3  125.39   28.60
  -6 -23   3   22.80   11.40
  -6  23   3   30.00   12.80
   6  23  -3   60.19   21.40
  -5 -23   3   60.39   13.70
   5  23  -3   57.49   18.40
  -5  23   3   13.10    9.90
  -4 -23   3  409.46   37.20
   4  23  -3  327.77   42.70
  -4  23   3  284.87   38.00
  -3 -23   3  161.48   23.80
  -3  23   3  216.98   27.70
   3  23  -3  240.98   30.90
  -2 -23   3    8.20    7.80
   2  23  -3    3.90    9.20
  -2  23   3    2.20    8.80
  -1 -23   3   21.40    8.40
  -1  23   3   12.80   10.50
   1  23  -3   33.60   11.00
   0 -23   3  129.39   16.90
   0  23   3  127.39   21.30
   0  23  -3  117.89   18.60
   0  23   3  105.49   13.00
  -1  23  -3  424.76   41.50
   1  23   3  404.16   36.30
   1  23   3  432.16   49.10
  -2  23  -3   94.49   17.40
   2  23   3  124.59   23.80
   3  23   3   23.30   15.40
  -3  23  -3   10.50    9.80
  -4  23  -3   -3.50    8.80
   4  23   3    3.50   13.80
   5  23   3   99.49   26.70
  -5  23  -3  114.69   21.10
   6  23   3   53.99   23.50
  -6  23  -3   86.99   20.10
  -7  23  -3   55.49   18.60
   7  23   3   64.79   23.60
   8  23   3   -3.10   15.90
  -8  23  -3   22.90   15.30
   9  24  -3    9.00   20.80
  -9  24   3    5.50   12.60
  -8 -24   3    2.30    8.80
  -8  24   3    6.50   10.70
   8  24  -3  -10.30   16.40
  -7 -24   3   99.19   19.20
  -7  24   3  157.68   26.00
   7  24  -3   99.09   25.60
  -6 -24   3   76.59   15.90
   6  24  -3   45.10   20.10
  -6  24   3   69.89   16.80
  -5 -24   3   11.00    9.40
   5  24  -3  -25.90   10.90
  -5  24   3   -2.80    9.00
  -4 -24   3   51.69   13.30
   4  24  -3   40.00   15.90
  -4  24   3   50.49   14.10
  -3 -24   3   53.29   12.40
   3  24  -3   90.49   18.60
  -3  24   3   54.89   14.30
  -2 -24   3  114.29   18.70
   2  24  -3  107.89   21.50
  -2  24   3  156.68   23.50
  -1 -24   3  575.94   51.69
   1  24  -3  563.64   53.59
  -1  24   3  488.35   53.89
   0 -24   3   94.39   15.20
   0  24   3   69.69   17.80
   0  24   3   82.09   10.70
   0  24  -3   89.39   16.80
   1  24   3   11.20   10.90
  -1  24  -3   -6.40    7.70
   1  24   3   -0.50    4.60
   2  24   3  114.09   23.70
  -2  24  -3  135.09   20.80
  -3  24  -3  127.79   20.90
   3  24   3  119.69   25.10
   4  24   3   17.20   15.80
  -4  24  -3   27.30   12.00
  -5  24  -3    3.20    9.20
   5  24   3   -4.10   14.80
  -6  24  -3   20.20   11.90
   6  24   3    6.10   16.20
  -7  24  -3   34.00   15.90
   7  24   3   32.40   22.30
  -8  24  -3   80.89   23.00
   8  24   3   60.49   27.00
  -9  25   3   -5.80   10.50
   9  25  -3   16.70   24.50
  -8 -25   3   34.20   13.90
  -8  25   3   65.69   19.20
   8  25  -3   82.19   26.20
  -7 -25   3   40.90   14.00
  -7  25   3   19.40   13.00
   7  25  -3   55.09   20.80
  -6 -25   3   10.80    9.80
   6  25  -3   40.30   18.20
  -6  25   3   12.10   11.20
  -5 -25   3  183.88   25.50
  -5  25   3  158.28   26.30
   5  25  -3  194.38   32.30
  -4 -25   3   61.49   13.50
  -4  25   3   75.29   16.70
   4  25  -3   53.39   18.60
  -3 -25   3  142.19   22.30
  -3  25   3  208.58   27.10
   3  25  -3  192.28   28.30
  -2 -25   3   31.50   10.50
  -2  25   3   35.20   12.60
   2  25  -3   19.20   12.90
  -1 -25   3   19.40    9.40
   1  25  -3   31.60   12.20
  -1  25   3   11.30    9.90
   0 -25   3   78.29   14.90
   0  25   3  117.29   12.80
   0  25  -3  112.19   18.40
   0  25   3   95.69   19.70
   1  25   3  218.78   30.40
  -1  25  -3  169.68   24.50
   2  25   3  -16.00    8.80
  -2  25  -3    6.30    9.80
   3  25   3   18.60   13.60
  -3  25  -3    2.00    8.90
   4  25   3   25.30   16.80
  -4  25  -3    7.10    9.80
  -5  25  -3  144.09   23.70
   5  25   3   81.79   26.70
   6  25   3   33.60   20.30
  -6  25  -3   28.70   13.80
   7  25   3    0.30   16.40
  -7  25  -3    3.80   12.00
  -8  25  -3  -28.20    8.70
   8  25   3   -0.80   16.50
  -9  26   3  -13.10    9.40
  -8 -26   3   26.20   12.20
  -8  26   3   -3.40   11.70
   8  26  -3    3.80   18.40
  -7 -26   3    2.80    8.70
   7  26  -3    5.50   16.40
  -7  26   3   15.20   12.70
  -6 -26   3    4.50    9.50
  -6  26   3   -0.10    9.90
   6  26  -3   -8.50   14.90
  -5 -26   3   12.00    9.40
   5  26  -3   44.30   18.00
  -5  26   3   48.10   14.40
  -4 -26   3    1.80    7.50
  -4  26   3   -1.20    8.50
   4  26  -3    5.70   13.40
  -3 -26   3   39.00   11.20
   3  26  -3    8.80   11.80
  -3  26   3    8.60    9.30
  -2 -26   3   11.80    8.00
   2  26  -3    2.50   10.70
  -2  26   3    3.80    9.10
  -1 -26   3   24.00    8.70
  -1  26   3   13.90   10.30
   1  26  -3   31.50   12.60
   0 -26   3   14.60    7.60
   0  26   3   28.40   14.40
   0  26   3   15.70    5.10
   0  26  -3    9.70    8.90
  -1  26  -3    6.40    9.70
   1  26   3   20.60   12.60
  -2  26  -3    3.20    9.10
   2  26   3    7.90   13.40
   3  26   3   -8.90   11.00
  -3  26  -3   16.80   10.50
  -4  26  -3   41.50   14.40
   4  26   3   15.20   16.30
  -5  26  -3   -5.30   10.40
   5  26   3   22.70   16.20
  -6  26  -3    8.80   11.20
   6  26   3    4.30   14.50
  -7  26  -3   -7.90   11.80
   7  26   3   -3.90   18.20
   8  26   3    0.80   15.60
  -8  26  -3    4.40   13.50
  -8 -27   3    5.20   10.00
  -8  27   3   -1.50   11.30
   8  27  -3   -0.20   18.40
  -7 -27   3   -1.40    8.90
  -7  27   3    2.50   10.40
   7  27  -3   25.50   18.30
  -6 -27   3   -2.30    8.90
   6  27  -3    7.30   15.00
  -6  27   3   -5.60   10.10
  -5 -27   3    1.80    8.90
  -5  27   3   -6.90    8.10
   5  27  -3   10.70   14.60
  -4 -27   3  106.49   19.60
  -4  27   3  103.89   21.40
   4  27  -3  123.99   24.80
  -3 -27   3   -1.50    7.10
   3  27  -3   -6.40   11.00
  -3  27   3   27.30   10.80
  -2 -27   3    5.70    8.60
   2  27  -3   -6.20   10.50
  -2  27   3   14.00   10.20
  -1 -27   3   -0.70    7.80
  -1  27   3   -8.70    9.60
   1  27  -3   -0.40    9.90
   0  27   3  165.58   26.90
   0  27  -3  185.98   26.40
   0  27   3  166.78   17.40
  -1  27  -3   10.70    9.80
   1  27   3   -3.00    9.30
  -2  27  -3   13.70   10.60
   2  27   3   11.10   13.20
  -3  27  -3   -9.00    8.40
   3  27   3    9.80   15.50
   4  27   3   -8.10   14.70
  -4  27  -3    4.30   11.50
  -5  27  -3   15.60   11.80
   5  27   3  -25.30   12.10
   6  27   3   -5.30   15.30
  -6  27  -3   22.40   13.90
  -7  27  -3    1.20   13.30
   7  27   3  -18.00   14.30
   8  27   3    1.80   19.00
  -8  27  -3    5.80   12.50
  -8 -28   3   -7.80   10.10
   8  28  -3  -14.60   17.80
  -8  28   3   25.50   14.50
  -7 -28   3   10.00   11.10
  -7  28   3   29.60   15.20
   7  28  -3    6.90   17.70
  -6 -28   3    5.30   10.40
   6  28  -3   32.80   18.90
  -6  28   3   16.20   10.70
  -5 -28   3    1.40    9.00
  -5  28   3   31.70   13.60
   5  28  -3   53.79   19.20
  -4 -28   3    8.00    8.80
  -4  28   3    1.30    8.10
   4  28  -3    4.90   13.60
  -3 -28   3   18.00    9.50
  -3  28   3   14.60   11.40
   3  28  -3   35.90   15.30
  -2 -28   3  266.27   31.70
  -2  28   3  294.07   35.60
   2  28  -3  206.58   33.20
  -1 -28   3   82.19   16.10
   1  28  -3   90.49   18.50
  -1  28   3  112.59   22.20
   0  28   3   52.79   16.20
   0  28  -3   42.30   14.20
  -1  28  -3    2.10    8.70
   1  28   3   -3.70   12.60
  -2  28  -3  125.39   21.10
   2  28   3  131.39   26.30
  -3  28  -3  109.29   19.50
   3  28   3   58.09   20.70
  -4  28  -3   23.10   12.80
   4  28   3   37.30   20.50
  -5  28  -3   17.90   12.00
   5  28   3    6.10   18.10
  -6  28  -3   14.90   13.60
   6  28   3   21.80   17.70
   7  28   3   51.89   23.00
  -7  28  -3   50.49   18.10
   8  28   3   28.60   23.40
  -8  28  -3    5.80   14.70
  -8 -29   3   34.50   14.00
  -8  29   3   36.00   16.40
   8  29  -3   12.90   19.90
  -7 -29   3   18.10   10.50
  -7  29   3    9.90   12.40
   7  29  -3    7.40   19.30
  -6 -29   3    9.40   11.20
   6  29  -3   15.50   15.70
  -6  29   3    3.50   10.50
  -5 -29   3   78.59   18.60
  -5  29   3   78.99   17.90
   5  29  -3   54.39   21.70
  -4 -29   3  241.98   30.30
   4  29  -3  184.08   33.00
  -4  29   3  206.28   30.80
  -3 -29   3   -2.30    8.80
  -3  29   3   16.90   12.90
   3  29  -3  -13.40   11.00
  -2 -29   3    8.20    9.20
   2  29  -3    3.30   10.10
  -2  29   3   24.60   12.60
  -1 -29   3   43.10   11.80
   1  29  -3   31.70   13.00
  -1  29   3   29.70   14.00
   0  29   3  186.88   30.20
   0  29  -3  135.59   24.00
   1  29   3   95.79   22.20
  -1  29  -3   86.99   17.70
   2  29   3   23.10   18.10
  -2  29  -3   53.99   14.80
  -3  29  -3   19.20   11.70
   3  29   3   13.30   15.40
  -4  29  -3   36.40   14.50
   4  29   3   43.20   19.70
  -5  29  -3   31.70   13.90
   5  29   3    4.00   17.20
   6  29   3   72.09   27.10
  -6  29  -3   90.69   22.20
   7  29   3   10.50   18.60
  -7  29  -3   16.70   14.20
  -8 -30   3   -0.20    9.90
  -8  30   3    2.30   12.60
   8  30  -3   13.50   19.70
  -7 -30   3    0.50   10.00
   7  30  -3    4.90   18.20
  -7  30   3   20.00   13.20
  -6 -30   3   13.60    9.50
   6  30  -3   15.50   16.20
  -6  30   3   -0.60   11.50
  -5 -30   3    3.40    9.20
   5  30  -3   16.30   18.00
  -5  30   3    2.00   10.60
  -4 -30   3   -0.50    8.10
  -4  30   3    5.50   11.10
   4  30  -3   -4.10   12.90
  -3 -30   3   -1.10    8.70
   3  30  -3   -3.10   12.50
  -3  30   3   -2.40   10.80
  -2 -30   3  139.59   22.40
  -2  30   3  162.78   26.40
   2  30  -3  186.68   28.60
  -1 -30   3    3.70    8.70
   1  30  -3    1.50    9.50
  -1  30   3    0.50   10.60
   0  30   3    7.10   11.60
   0  30  -3   38.30   14.40
   1  30   3    3.50   11.80
  -1  30  -3   -9.80    8.80
   2  30   3   24.20   17.20
  -2  30  -3   63.59   14.80
  -3  30  -3  121.49   21.70
   3  30   3  115.69   27.40
   4  30   3   12.30   16.80
  -4  30  -3   14.10   12.90
   5  30   3    3.20   15.30
  -5  30  -3    4.60   11.10
   6  30   3  -26.10   15.70
  -6  30  -3   19.10   12.60
  -7  30  -3   37.00   16.10
   7  30   3   79.59   28.50
  -8 -31   3   -9.60    9.10
  -8  31   3   -2.70   11.00
  -7 -31   3   -2.40   10.70
  -7  31   3    4.30   12.60
   7  31  -3   -5.10   17.10
  -6 -31   3   39.00   15.20
   6  31  -3   52.09   21.40
  -6  31   3   17.50   12.50
  -5 -31   3   -5.60    9.50
   5  31  -3   14.50   16.50
  -5  31   3    6.40   10.60
  -4 -31   3   30.20   12.10
  -4  31   3    1.90    9.30
   4  31  -3    3.20   15.60
  -3 -31   3    7.70    8.40
   3  31  -3   17.00   14.90
  -3  31   3   -1.50   10.10
  -2 -31   3   -2.80    8.90
  -2  31   3   -1.30    9.90
   2  31  -3    6.80   13.50
   1  31  -3   -0.90   10.20
  -1  31   3   14.60   13.50
   0  31  -3   51.29   15.70
   0  31   3   64.29   17.60
   1  31   3   19.10   14.60
  -1  31  -3   15.10   12.70
  -2  31  -3   16.70   11.80
   2  31   3   11.00   17.10
  -3  31  -3   -3.60    8.80
   3  31   3   22.60   17.80
  -4  31  -3   13.30   12.60
   4  31   3   12.00   18.40
  -5  31  -3   25.10   14.50
   5  31   3   15.00   17.40
   6  31   3   -7.00   18.10
  -6  31  -3    8.70   12.60
   7  31   3   -6.90   16.60
  -7  31  -3   12.70   12.60
  -7 -32   3    3.70    9.60
  -7  32   3   -6.50   10.20
   7  32  -3   24.30   21.80
  -6 -32   3   -6.50    9.30
  -6  32   3   13.10   13.10
   6  32  -3   -6.40   14.10
  -5 -32   3   -8.10    9.40
  -5  32   3    2.10   11.90
   5  32  -3  -20.00   13.20
  -4 -32   3   -1.20    8.70
   4  32  -3   -2.80   13.80
  -4  32   3    3.60   10.40
  -3 -32   3   29.10   12.50
   3  32  -3   41.00   18.40
  -3  32   3    0.60   11.40
  -2 -32   3    0.90    9.50
   2  32  -3   -0.30   12.80
  -2  32   3   15.70   12.20
  -1  32   3   13.10   12.60
   1  32  -3   17.40   12.40
   0  32   3   62.99   18.30
   0  32  -3   42.00   16.20
   1  32   3   20.10   15.70
  -1  32  -3   26.40   14.00
  -2  32  -3   22.20   12.10
   2  32   3   34.40   18.60
   3  32   3   27.80   18.90
  -3  32  -3   12.50   12.70
  -4  32  -3   10.20   11.00
   4  32   3   10.50   17.00
   5  32   3   10.50   18.80
  -5  32  -3   15.10   13.10
  -6  32  -3    5.00   13.80
   6  32   3   -5.90   16.40
  -7  32  -3    6.10   14.20
   7  32   3  -17.90   16.90
  -7 -33   3   -0.10    9.20
  -7  33   3  -12.40   11.40
   7  33  -3    8.50   17.80
  -6 -33   3   -5.50    9.60
   6  33  -3    9.10   18.40
  -6  33   3    1.90   12.40
  -5 -33   3   21.50   11.30
  -5  33   3   52.69   16.60
   5  33  -3   35.00   21.40
  -4 -33   3   40.90   13.10
   4  33  -3   32.40   16.60
  -4  33   3   44.90   16.10
  -3 -33   3   95.19   19.70
  -3  33   3   82.49   21.40
   3  33  -3  117.99   26.60
  -2 -33   3    4.20    8.90
   2  33  -3   -8.90   11.50
  -2  33   3    2.60   11.10
  -1  33   3    4.60   11.40
   1  33  -3   -7.10   10.60
   0  33   3    2.60   13.30
   0  33  -3    2.60   12.00
   1  33   3  142.99   29.70
  -1  33  -3  180.28   27.90
   2  33   3   36.90   19.70
  -2  33  -3   35.30   15.10
  -3  33  -3   -2.20    9.20
   3  33   3    6.90   14.60
   4  33   3    8.40   19.70
  -4  33  -3   21.30   13.10
  -5  33  -3   35.80   15.90
   5  33   3   48.80   23.70
   6  33   3    7.30   21.10
  -6  33  -3   22.70   15.50
  -7  33  -3    4.60   15.40
   7  33   3   12.10   22.70
  -7 -34   3   10.30   11.40
  -7  34   3   18.90   15.30
   7  34  -3   11.50   18.90
  -6 -34   3   13.50   11.00
  -6  34   3   28.90   14.20
   6  34  -3   31.70   22.90
  -5 -34   3   72.49   17.30
   5  34  -3   43.00   21.30
  -5  34   3   55.69   17.30
  -4 -34   3    7.80   11.00
   4  34  -3   17.80   16.10
  -4  34   3    8.00   13.00
  -3 -34   3   47.50   14.80
  -3  34   3   52.19   17.90
   3  34  -3   56.59   20.00
  -2 -34   3   41.80   13.90
   2  34  -3   56.89   19.60
  -2  34   3   29.10   16.00
   1  34  -3   44.40   16.80
  -1  34   3   55.69   17.70
   0  34   3   22.10   15.30
   0  34  -3   23.60   14.60
   1  34   3  -10.00   13.60
  -1  34  -3   11.20   12.10
   2  34   3   29.70   17.70
  -2  34  -3    8.50   12.20
   3  34   3  120.69   30.40
  -3  34  -3   73.09   19.70
   4  34   3   36.90   20.90
  -4  34  -3   34.50   15.70
  -5  34  -3   32.60   14.80
   5  34   3    3.60   17.60
   6  34   3   24.80   21.50
  -6  34  -3   -8.70   11.40
  -7 -35   3   11.00   12.40
  -7  35   3    3.80   12.20
   7  35  -3   24.20   22.90
  -6 -35   3   21.90   14.20
   6  35  -3  -15.40   17.10
  -6  35   3   -2.50   11.90
  -5 -35   3   34.30   14.80
  -5  35   3   52.69   17.20
   5  35  -3   36.80   21.60
  -4 -35   3   93.69   20.80
   4  35  -3   83.89   24.20
  -4  35   3   73.89   20.90
  -3 -35   3   90.89   18.50
   3  35  -3   54.39   20.40
  -3  35   3   61.89   18.00
  -2  35   3   44.70   18.50
   2  35  -3   76.39   20.50
   1  35  -3   14.10   14.20
  -1  35   3   14.90   15.00
   0  35  -3   71.09   20.80
   0  35   3   74.89   21.70
  -1  35  -3   90.09   21.00
   1  35   3   52.19   20.20
   2  35   3   34.70   19.30
  -2  35  -3    8.50   12.70
   3  35   3   -8.60   17.50
  -3  35  -3    2.20   10.40
   4  35   3   41.10   23.20
  -4  35  -3   14.10   12.10
   5  35   3   35.30   24.30
  -5  35  -3   69.99   20.10
  -6  35  -3   24.30   15.20
   6  35   3   37.40   22.80
  -6 -36   3   17.00   13.50
   6  36  -3  -16.30   17.60
  -6  36   3   26.70   14.70
  -5 -36   3   -9.80    9.10
  -5  36   3    4.50   13.00
   5  36  -3  -10.10   15.00
  -4 -36   3    8.70   10.40
   4  36  -3    2.80   15.10
  -4  36   3   22.00   15.10
  -3 -36   3   10.00   11.10
   3  36  -3   -3.60   13.80
  -3  36   3   24.90   12.90
   2  36  -3    2.30   14.90
  -2  36   3    4.70   11.90
   1  36  -3   44.60   18.50
  -1  36   3   51.89   19.10
   0  36  -3   -6.00   12.10
   0  36   3   -8.00   13.40
  -1  36  -3   12.00   13.80
   1  36   3  -13.10   13.10
  -2  36  -3   -3.10    9.90
   2  36   3    1.80   15.80
  -3  36  -3   55.29   17.80
   3  36   3   -2.80   17.40
   4  36   3   -5.00   19.00
  -4  36  -3   14.30   14.60
   5  36   3    3.30   19.10
  -5  36  -3  -10.50   11.20
  -6  36  -3   15.70   15.40
   6  36   3   43.40   25.90
  -6 -37   3   -9.10   10.70
  -6  37   3    2.60   12.00
   6  37  -3   -1.60   19.10
  -5 -37   3   -6.20   10.10
  -5  37   3   -1.60   12.10
   5  37  -3   34.90   19.10
  -4 -37   3    4.00    9.40
  -4  37   3    2.90   12.60
   4  37  -3   10.90   17.90
   3  37  -3   17.40   18.00
  -3  37   3   11.30   12.00
   2  37  -3   -3.10   14.90
  -2  37   3  -12.30   12.90
  -1  37   3   16.50   14.30
   1  37  -3    3.70   14.40
   0  37   3    9.50   15.90
   0  37  -3    9.40   14.00
   1  37   3  -16.50   13.50
  -1  37  -3    2.60   11.60
   2  37   3   14.20   19.80
  -2  37  -3   21.40   13.30
  -3  37  -3   -1.90   12.40
   3  37   3   28.30   21.00
   4  37   3   -3.00   22.40
  -4  37  -3   -2.60   10.30
   5  37   3  -12.30   16.30
  -5  37  -3    7.10   13.90
  -6 -38   3    8.70   13.00
   6  38  -3   26.40   23.00
  -6  38   3   17.00   16.00
  -5 -38   3   -9.30    8.90
  -5  38   3    2.20   13.50
   5  38  -3   10.00   20.20
  -4 -38   3   -1.00    8.50
  -4  38   3   -6.30   12.40
   4  38  -3  -11.40   14.00
  -3  38   3   14.40   15.10
   3  38  -3   30.30   19.10
   2  38  -3   -9.60   12.20
  -2  38   3  -14.90   10.40
   1  38  -3   13.30   15.50
  -1  38   3   40.40   17.50
   0  38   3  -18.00   13.10
   0  38  -3   10.60   13.40
   1  38   3   18.80   16.50
  -1  38  -3   11.60   13.30
   2  38   3    8.60   17.10
  -2  38  -3   14.90   15.40
  -3  38  -3    9.90   12.10
   3  38   3    3.40   18.90
   4  38   3  -13.70   18.40
  -4  38  -3   -6.10   12.70
   5  38   3   -1.20   19.70
  -5  38  -3   20.90   15.70
  -5 -39   3   58.69   16.60
  -5  39   3   39.90   17.30
   5  39  -3   61.09   27.00
  -4  39   3   95.99   23.20
   4  39  -3   51.69   23.70
   3  39  -3   77.69   24.90
  -3  39   3  155.78   29.70
  -2  39   3   35.50   18.70
   2  39  -3   13.40   17.10
   1  39  -3   17.20   17.00
  -1  39   3   24.50   17.60
   0  39  -3   25.70   16.60
   0  39   3   52.79   21.70
  -1  39  -3   35.80   17.60
   1  39   3    6.80   17.20
  -2  39  -3   61.49   20.10
   2  39   3   55.89   23.90
  -3  39  -3    9.00   15.40
   3  39   3   36.10   21.60
   4  39   3  -10.50   21.10
  -4  39  -3   16.70   14.20
  -5  39  -3    8.20   14.40
   5  39   3   59.49   29.10
  -5  40   3   13.20   15.20
   5  40  -3   38.60   22.80
   4  40  -3  -26.40   15.00
  -4  40   3    5.80   15.20
  -3  40   3   -0.90   14.50
   3  40  -3   36.70   20.50
  -2  40   3   86.49   22.90
   2  40  -3  101.29   27.40
  -1  40   3   70.99   21.30
   1  40  -3   46.60   21.20
   0  40  -3   18.30   16.00
   0  40   3   -2.60   16.60
   1  40   3   -5.10   14.90
  -1  40  -3   22.40   17.70
  -2  40  -3    7.90   14.00
   2  40   3   38.10   22.30
   3  40   3   30.00   20.50
  -3  40  -3   24.30   16.70
   4  40   3   58.29   27.20
  -4  40  -3   43.90   17.90
  -4  41   3   15.10   16.60
   4  41  -3    5.90   18.40
  -3  41   3    3.20   13.20
   3  41  -3    4.50   16.30
   2  41  -3    7.60   18.10
  -2  41   3   -1.40   14.10
   1  41  -3   25.10   17.80
  -1  41   3    4.00   13.40
   0  41   3   15.80   19.30
   0  41  -3   26.00   17.50
  -1  41  -3   13.20   16.00
   1  41   3    9.50   16.10
  -2  41  -3   10.20   16.10
   2  41   3   22.40   20.50
  -3  41  -3    8.40   14.10
   3  41   3  -13.10   19.00
  -4  41  -3   10.00   16.20
   4  41   3   18.90   24.70
   4  42  -3   29.20   21.30
  -4  42   3   11.80   15.50
   3  42  -3  -16.50   17.10
  -3  42   3   16.90   14.30
  -2  42   3    0.80   12.40
   2  42  -3    8.00   18.40
   1  42  -3    8.20   16.90
  -1  42   3  -18.00   12.30
   0  42  -3   -2.10   15.70
   0  42   3   -2.60   16.20
  -1  42  -3   15.00   15.60
   1  42   3  -12.90   13.60
  -2  42  -3    9.90   16.60
   2  42   3    9.70   18.60
   3  42   3    1.60   22.20
  -3  42  -3   -7.80   11.50
  -3  43   3   -7.10   15.80
   3  43  -3   -6.20   18.20
   2  43  -3   -0.20   18.20
  -2  43   3  -16.90   12.90
  -1  43   3   -0.10   14.30
   1  43  -3    4.40   17.20
   0  43  -3   -9.80   15.00
   0  43   3    2.20   18.90
   1  43   3   17.80   18.10
  -1  43  -3   26.80   16.10
  -2  43  -3    1.30   16.50
   2  43   3    8.70   20.50
   3  43   3  -18.90   16.60
  -3  43  -3  -13.00   12.60
  -2  44   3   34.60   19.70
   2  44  -3   23.20   19.80
   1  44  -3   25.10   20.50
  -1  44   3   -6.30   13.30
   0  44  -3   -6.90   15.00
   0  44   3   -0.90   18.20
   1  44   3   10.60   19.80
  -1  44  -3    2.20   16.00
   2  44   3   26.20   25.20
  -2  44  -3    2.80   15.50
   1  45  -3   -8.10   17.40
  -1  45   3   -4.80   17.00
   0  45  -3   29.80   18.80
   0  45   3   21.00   23.00
  -1  45  -3   22.80   18.30
  10   0  -4   35.70   21.00
   9   0  -4  132.29   30.40
   8   0  -4  214.08   35.20
  -8   0   4  236.78   27.90
   7   0  -4   19.70   15.20
   6   0  -4  208.38   30.30
   5   0  -4  175.18   24.80
   4   0  -4 2703.63  230.38
   3   0  -4 2103.59  181.08
  -3   0   4 2161.18  179.48
  -2   0   4  209.48   18.40
  -2   0   4  193.98   18.60
  -1   0   4 1108.19   99.09
  -1   0   4 1233.28   98.79
   0   0   4  723.73   61.69
   0   0   4  723.33   62.39
   1   0   4  237.78   25.50
   1   0   4  243.28   22.00
   2   0   4 1739.63  152.78
   2   0   4 1781.62  148.79
   3   0   4  200.58   27.50
   3   0   4  174.88   17.40
   4   0   4   23.90   14.50
   4   0   4   53.69    8.40
   5   0   4  527.85   57.39
   5   0   4  436.86   41.00
   6   0   4   11.10    5.50
   6   0   4   29.70   14.90
   7   0   4   68.99   22.00
   8   0   4    9.10   17.00
   9   0   4  111.89   29.80
  10   0   4   60.09   25.20
  10  -1  -4   37.20   21.60
  10   1  -4   49.70   24.10
   9  -1  -4   16.40   18.40
   9   1  -4   19.30   17.90
  -8  -1   4    5.30    6.90
   8  -1  -4   21.50   16.20
   8   1  -4   19.20   16.90
   7  -1  -4   13.00   12.40
   7   1  -4   -3.30   12.70
   6  -1  -4  161.58   26.60
   6   1  -4  163.38   25.40
   5  -1  -4  795.72   77.89
   5   1  -4  909.31   78.69
   4  -1  -4  275.87   31.00
  -4  -1   4  292.77   27.00
   4   1  -4  319.17   31.20
  -3  -1   4  470.05   43.20
  -3   1   4  520.35   43.60
   3   1  -4  507.15   45.60
  -2  -1   4  378.96   32.20
  -2   1   4  367.36   32.10
  -2   1   4  352.86   32.30
  -1  -1   4   30.60    5.10
  -1   1   4   36.40    5.00
  -1   1   4   32.30    5.50
   0  -1   4   62.49    7.60
   0  -1   4   69.19    9.00
   0   1   4   65.69    9.60
   0   1   4   56.09    7.30
   1  -1   4   68.79    8.30
   1  -1   4   53.59   11.60
   1   1   4   43.30   11.10
   1   1   4   66.89    7.90
   2  -1   4   34.00   11.50
   2  -1   4   43.00    6.60
   2   1   4   44.10    6.70
   2   1   4   44.40   12.50
   3  -1   4  191.68   19.20
   3  -1   4  173.58   26.60
   3   1   4  193.98   18.80
   3   1   4  259.27   30.70
   4  -1   4  622.24   52.69
   4  -1   4  549.45   59.19
   4   1   4  564.84   59.59
   4   1   4  608.34   52.59
   5  -1   4  123.49   15.90
   5  -1   4  129.29   25.60
   5   1   4  166.18   17.10
   5   1   4  138.59   26.30
   6  -1   4    9.90   12.70
   6   1   4    3.20    5.40
   6   1   4    9.50   13.90
   7  -1   4  279.67   44.40
   7   1   4  334.47   47.90
   8  -1   4  162.78   34.40
   8   1   4  164.98   35.50
   9  -1   4   -6.50   12.70
   9   1   4   11.40   16.50
  10  -1   4   54.29   25.40
  10   1   4   40.20   26.40
  10   2  -4  -10.20   16.40
   9  -2  -4   -8.70   16.20
   9   2  -4  -38.70   13.00
   8  -2  -4   16.10   16.40
  -8  -2   4    8.50    6.90
   8   2  -4   -2.70   14.80
   7  -2  -4   46.90   16.80
   7   2  -4    8.50   14.10
   6  -2  -4   26.90   14.10
   6   2  -4   27.80   13.10
   5  -2  -4    1.10    9.20
   5   2  -4   11.00   10.30
   4  -2  -4  324.17   31.60
  -4  -2   4  273.87   26.50
   4   2  -4  300.87   31.00
  -3  -2   4 1347.07  113.49
   3   2  -4 1376.36  115.49
  -3   2   4 1352.46  113.89
  -3   2   4 1301.87  114.19
  -2  -2   4   43.30    6.00
  -2   2   4   39.10    6.20
   2   2  -4   42.80    6.90
  -2   2   4   36.60    6.10
  -1  -2   4   92.99    9.10
  -1   2   4   84.49    9.20
  -1   2   4   76.99    9.30
   0  -2   4   63.59    8.40
   0  -2   4   77.29    9.70
   0   2   4   98.29   11.50
   0   2   4   74.59    8.70
   1  -2   4  434.76   37.70
   1  -2   4  412.26   40.20
   1   2   4  434.76   37.50
   1   2   4  436.66   40.50
   2  -2   4  736.73   60.49
   2  -2   4  649.83   63.89
   2   2   4  670.73   64.19
   2   2   4  708.93   60.09
   3  -2   4    0.60    3.60
   3  -2   4   -2.60    8.70
   3   2   4   -4.00    8.10
   3   2   4   -2.00    3.60
   4  -2   4    0.30    4.00
   4  -2   4   -1.00   11.40
   4   2   4    6.30    4.00
   4   2   4  -13.30    8.30
   5  -2   4  139.49   16.20
   5  -2   4   83.79   23.60
   5   2   4  145.99   16.20
   5   2   4  143.59   28.10
   6  -2   4   -0.70   12.00
   6   2   4  -19.00   12.00
   6   2   4    7.70    5.50
   7  -2   4   30.60   18.80
   7   2   4   16.60   15.00
   8  -2   4   19.50   18.90
   8   2   4    7.10   18.60
   9  -2   4   12.60   17.10
   9   2   4   22.90   18.80
  10  -2   4   -4.90   16.30
  10   2   4    4.50   18.40
  10   3  -4   -1.50   18.40
   9   3  -4   11.30   17.60
   8  -3  -4   10.40   14.30
  -8  -3   4    0.70    5.90
   8   3  -4  -12.50   13.70
  -7  -3   4    6.20    6.40
   7  -3  -4  -20.00   10.60
   7   3  -4   33.70   15.60
   6  -3  -4   11.90   11.70
   6   3  -4    1.50   10.30
   5  -3  -4   21.40   10.70
   5   3  -4   12.40   10.80
  -4  -3   4   83.79   10.00
   4   3  -4   91.69   15.20
  -4   3   4   80.89   11.60
  -3  -3   4   32.80    5.20
  -3   3   4   26.20    6.30
   3   3  -4   25.20    8.60
  -2  -3   4  278.07   24.70
  -2   3   4  280.37   25.00
   2   3  -4  269.57   25.40
  -2   3   4  278.97   25.10
  -1  -3   4  310.67   27.70
  -1   3   4  306.77   28.00
  -1   3   4  330.37   28.00
   0  -3   4  159.28   14.80
   0  -3   4  156.98   15.60
   0   3   4  158.58   16.80
   0   3   4  148.49   14.60
   1  -3   4  102.59   11.40
   1  -3   4  118.79   15.50
   1   3   4   93.09   10.90
   1   3   4  127.89   16.40
   2  -3   4   94.89   10.90
   2  -3   4  103.49   16.60
   2  -3   4   83.89    8.00
   2   3   4   85.59   10.00
   2   3   4   84.09   15.90
   3  -3   4   33.00   13.00
   3  -3   4   44.70    7.40
   3   3   4   37.60    6.60
   3   3   4   47.80   13.90
   4  -3   4   15.70   11.90
   4  -3   4    8.90    4.50
   4   3   4    3.00   11.60
   4   3   4    0.90    3.60
   5  -3   4   21.00    6.30
   5  -3   4    1.30   12.40
   5   3   4   -1.00   11.30
   5   3   4    5.10    4.70
   6  -3   4   67.09   20.20
   6   3   4   64.89   10.40
   6   3   4   53.89   20.30
   7  -3   4   44.10   19.20
   7   3   4   67.99   22.20
   8  -3   4   20.20   18.50
   8   3   4   -3.80   17.50
   9  -3   4   32.30   21.40
   9   3   4    2.50   16.60
  10  -3   4    0.30   20.20
  10   3   4    6.10   21.30
  10   4  -4    3.60   19.30
 -10   4   4    6.90   11.10
   9   4  -4   66.89   23.90
  -8  -4   4  170.98   23.50
   8   4  -4  204.28   34.70
  -7  -4   4   35.80    9.70
   7   4  -4   37.80   16.90
  -6  -4   4   -1.20    6.10
   6   4  -4    7.80   11.80
  -5  -4   4  318.97   28.30
  -5   4   4  300.57   30.20
   5   4  -4  294.77   36.40
  -4  -4   4   32.40    5.70
  -4   4   4   39.70    8.40
   4   4  -4   46.90   11.60
  -3  -4   4  534.05   44.50
  -3   4   4  514.35   45.70
   3   4  -4  479.45   46.90
  -2  -4   4   40.20    5.90
   2   4  -4   52.29    7.90
  -2   4   4   45.10    6.70
  -2   4   4   50.69    7.40
  -1  -4   4   40.50    6.10
  -1   4   4   53.49    7.50
  -1   4   4   41.20    6.20
   0  -4   4   11.70    4.00
   0   4   4   19.00    6.70
   0   4   4   14.50    3.90
   0   4  -4   19.90    4.30
   1  -4   4   78.29    9.00
   1  -4   4   56.99   11.50
   1   4   4   73.09   13.00
   1   4   4   62.99    7.90
   2  -4   4    6.60    2.10
   2  -4   4    9.30    4.10
   2  -4   4    2.60    8.70
   2   4   4    9.80    8.10
   2   4   4   12.40    3.90
   3  -4   4    4.00    4.80
   3  -4   4    9.10    9.80
   3   4   4    2.90   10.30
   3   4   4   12.20    4.00
   4  -4   4    2.90    4.60
   4  -4   4    1.90    9.80
   4   4   4  -11.10   10.40
   4   4   4    5.30    4.10
   5  -4   4   47.80    9.20
   5  -4   4   31.60   14.40
   5   4   4   30.00   15.20
   5   4   4   46.90    8.20
   6  -4   4  127.19   25.50
   6   4   4   96.09   23.80
   6   4   4  123.19   15.10
   7  -4   4   77.99   25.30
   7   4   4   97.69   27.20
   8  -4   4   -3.70   15.50
   8   4   4    9.80   18.50
   9  -4   4   26.20   18.40
   9   4   4   -5.10   17.90
  10  -4   4   23.30   23.30
  10   4   4   45.80   34.60
  10   5  -4  195.58   37.80
 -10   5   4  103.29   25.50
   9   5  -4    7.00   16.60
  -9   5   4    1.60    9.70
  -8  -5   4  116.89   17.70
   8   5  -4   96.79   23.90
  -8   5   4   83.79   17.70
  -7  -5   4   10.30    6.80
  -7   5   4    1.00    7.80
   7   5  -4   39.40   16.10
  -6  -5   4  104.89   16.40
  -6  -5   4  134.59   14.60
  -6   5   4  132.29   18.60
   6   5  -4  136.59   23.30
  -5  -5   4   70.79    9.20
  -5   5   4   59.49   11.90
   5   5  -4   91.09   17.10
  -4  -5   4   26.90    5.10
   4   5  -4   69.89   13.50
  -4   5   4   35.70    8.20
  -3  -5   4  291.67   26.40
  -3   5   4  294.17   28.10
   3   5  -4  313.97   29.70
  -2  -5   4  572.44   49.00
  -2   5   4  529.25   49.80
   2   5  -4  603.64   49.90
  -2   5   4  579.84   49.50
  -1  -5   4 1171.98   99.79
  -1   5   4 1211.38  100.59
  -1   5   4 1181.58  100.09
   1   5  -4 1170.78   99.29
   0  -5   4  223.48   21.00
   0   5  -4  245.18   21.10
   0   5   4  231.98   21.00
   0   5   4  215.78   23.10
   1  -5   4  381.16   34.80
   1  -5   4  433.06   37.60
   1  -5   4  370.26   34.30
   1   5   4  412.96   34.50
   1   5   4  398.66   38.10
   2  -5   4  978.50   85.19
   2  -5   4 1018.40   83.59
   2  -5   4  990.30   88.89
   2   5   4  983.00   84.59
   2   5   4 1004.50   89.59
   3  -5   4   94.49   18.70
   3  -5   4  117.09   13.80
   3   5   4   80.39   18.90
   3   5   4  134.19   12.40
   4  -5   4  366.36   34.50
   4  -5   4  439.36   47.20
   4   5   4  370.36   33.60
   4   5   4  350.86   44.90
   5  -5   4  220.18   30.80
   5  -5   4  125.99   16.20
   5   5   4  133.89   15.60
   5   5   4  125.89   25.90
   6  -5   4  109.29   24.40
   6   5   4  110.99   14.10
   6   5   4  115.39   26.90
   7  -5   4  145.69   29.10
   7   5   4  109.79   29.60
   8  -5   4   20.50   18.00
   8   5   4    1.30   14.30
   9  -5   4   30.50   20.20
   9   5   4   52.49   22.50
  10  -5   4   23.50   36.90
 -10   6   4   26.10   14.60
  10   6  -4   16.70   19.80
  -9   6   4   85.89   19.60
   9   6  -4   83.99   24.70
  -8  -6   4  128.29   19.70
  -8   6   4  142.09   23.40
   8   6  -4  142.69   29.00
  -7  -6   4    8.10    6.50
  -7   6   4   -7.20    7.20
   7   6  -4   13.60   13.40
  -6  -6   4   18.50    4.80
  -6  -6   4   11.70    7.20
  -6   6   4   19.30    9.10
   6   6  -4   19.70   12.80
  -5  -6   4  319.07   29.30
  -5  -6   4  317.27   31.70
  -5   6   4  322.67   32.60
   5   6  -4  356.66   36.60
  -4  -6   4  219.28   20.10
   4   6  -4  241.18   27.50
  -4   6   4  206.08   22.50
  -3  -6   4  285.47   26.70
   3   6  -4  319.17   30.00
  -3   6   4  317.67   28.80
  -2  -6   4   -1.50    2.50
   2   6  -4    3.90    5.20
  -2   6   4   -3.20    3.80
  -2   6   4   -0.60    3.20
  -1  -6   4   34.10    5.20
  -1   6   4   21.40    4.80
  -1   6   4   17.60    6.20
   1   6  -4   36.80    5.20
   0  -6   4   22.10    5.30
   0  -6   4   15.00    4.00
   0   6   4   23.50    4.30
   0   6  -4   19.00    4.70
   0   6   4   18.20    7.10
   1  -6   4  724.73   67.19
   1  -6   4  808.62   66.89
   1   6   4  759.62   70.29
   1   6   4  815.02   66.89
  -1   6  -4  804.32   67.69
   2  -6   4  480.65   40.30
   2  -6   4  502.85   42.00
   2  -6   4  456.55   45.30
   2   6   4  428.26   45.80
   2   6   4  469.05   41.10
   3  -6   4   55.79   14.40
   3  -6   4   93.99   10.80
   3   6   4   70.49    8.90
   3   6   4   58.99   15.20
   4  -6   4  222.58   22.20
   4  -6   4  248.68   31.90
   4   6   4  176.28   29.50
   4   6   4  220.48   20.90
   5  -6   4  313.57   28.90
   5  -6   4  351.56   42.80
   5   6   4  289.27   41.60
   5   6   4  276.27   27.50
   6  -6   4   39.80   16.40
   6   6   4   52.49    9.30
   6   6   4   72.49   21.00
   7  -6   4   38.70   19.90
   7   6   4   89.89   25.30
   8  -6   4    9.10   16.10
   8   6   4   -4.00   14.40
   9  -6   4  -18.90   13.30
   9   6   4    4.20   20.20
  10   7  -4  -10.70   16.50
 -10   7   4   -1.90   10.70
   9   7  -4   18.10   16.50
  -9   7   4    1.70   11.10
  -8  -7   4    1.60    6.70
  -8   7   4   -7.10    8.10
   8   7  -4   -0.90   14.40
  -7  -7   4    6.40    7.40
  -7   7   4   11.70    9.40
   7   7  -4   18.80   14.90
  -6  -7   4  147.49   18.30
  -6  -7   4  117.89   13.60
  -6   7   4   89.59   17.10
   6   7  -4  152.28   25.50
  -5  -7   4   27.00    7.70
  -5  -7   4   14.30    4.10
  -5   7   4   16.20    7.80
   5   7  -4   20.80   11.00
  -4  -7   4  111.29   14.90
  -4  -7   4  111.59   10.80
   4   7  -4   86.59   16.40
  -4   7   4   92.79   14.20
  -3  -7   4   97.09    9.90
  -3  -7   4   94.69   13.20
   3   7  -4  108.39   14.90
  -3   7   4   89.89   12.90
  -2  -7   4   41.30    5.70
  -2  -7   4   41.30    8.50
  -2   7   4   41.20    7.00
   2   7  -4   44.30    8.30
  -2   7   4   55.29    8.50
  -1  -7   4  421.66   37.60
  -1  -7   4  424.26   36.40
   1   7  -4  411.56   36.40
  -1   7   4  401.46   36.50
  -1   7   4  436.86   37.90
   0  -7   4   58.69    8.50
   0  -7   4   79.79    8.70
   0   7   4   75.89   11.70
   0   7  -4   64.99    8.50
   0   7   4   61.29    7.80
   1  -7   4  111.69   11.60
   1  -7   4  116.19   12.70
   1   7   4  113.69   17.20
   1   7   4  112.59   11.50
  -1   7  -4  125.09   14.20
   2  -7   4   42.00    5.50
   2  -7   4   54.39   13.00
   2  -7   4   48.60    7.50
   2   7   4   55.19    6.70
   2   7   4   44.40   12.90
   3  -7   4   41.00    8.10
   3  -7   4   50.19   14.20
   3   7   4   71.19   16.10
   3   7   4   46.60    6.90
   4  -7   4   70.99   17.40
   4  -7   4   43.40    8.80
   4   7   4   80.39    9.10
   4   7   4   36.90   15.90
   5  -7   4   31.70    8.40
   5  -7   4   19.50   14.00
   5   7   4   60.49    8.20
   5   7   4   29.00   16.10
   6  -7   4    5.20   12.30
   6   7   4   23.30    7.20
   6   7   4   33.40   18.70
   7  -7   4   -3.50   13.30
   7   7   4   25.70   17.20
   8  -7   4    1.20   14.70
   8   7   4    2.90   17.80
   9  -7   4  -11.80   17.00
   9   7   4  -22.40   14.10
  10   8  -4    7.30   20.80
 -10   8   4  -16.00    8.70
  -9   8   4    3.60   10.70
   9   8  -4    9.70   16.20
  -8  -8   4   -0.90    6.70
  -8   8   4  -12.50    7.80
   8   8  -4   11.20   16.20
  -7  -8   4   -2.20    6.50
  -7   8   4    8.40    9.50
   7   8  -4   -2.40   13.00
  -6  -8   4   19.50    8.20
  -6  -8   4   16.60    4.60
  -6   8   4    4.00    8.00
   6   8  -4   -2.00   11.70
  -5  -8   4    7.80    6.30
  -5  -8   4    5.40    3.10
  -5   8   4    0.60    6.10
   5   8  -4    0.90    9.60
  -4  -8   4  168.68   20.20
  -4  -8   4  158.48   15.20
  -4   8   4  183.48   20.70
   4   8  -4  131.69   20.90
  -3  -8   4   82.79    9.10
  -3  -8   4   78.09   12.40
   3   8  -4  107.89   14.90
  -3   8   4  109.79   13.90
  -2  -8   4  198.68   17.50
  -2  -8   4  186.28   19.60
  -2   8   4  184.78   19.30
   2   8  -4  186.88   19.60
  -2   8   4  188.38   18.30
  -1  -8   4   90.09   10.20
  -1  -8   4   97.89   12.30
  -1   8   4   93.29   12.70
  -1   8   4   83.79   10.30
   1   8  -4  106.09   11.10
   0  -8   4   51.99    7.10
   0  -8   4   52.79    8.20
   0   8   4   45.80    9.80
   0   8   4   64.39    7.50
   0   8  -4   54.39    8.10
   1  -8   4   21.80    4.60
   1  -8   4   20.20    5.00
  -1   8  -4   14.20    6.10
   1   8   4   32.10   10.20
   1   8   4   11.00    3.60
   2  -8   4   66.29    9.60
   2  -8   4   74.89    7.90
   2   8   4   68.59    8.50
   2   8   4   64.89   14.40
  -2   8  -4   78.89   11.40
   3  -8   4   32.80    7.20
   3  -8   4   38.60   12.30
   3   8   4   42.40   14.10
   3   8   4   46.40    6.60
   4  -8   4   15.50    5.40
   4  -8   4    7.10   10.30
   4   8   4    2.20    3.40
   4   8   4  -20.20    6.90
   5  -8   4   38.00   16.60
   5  -8   4   13.50    6.00
   5   8   4   28.90    6.00
   5   8   4   29.20   14.50
   6  -8   4   56.19   18.00
   6   8   4   44.90   18.40
   7  -8   4   -1.20   12.40
   7   8   4    7.90   15.00
   8  -8   4   24.50   17.70
   8   8   4    3.50   17.60
   9  -8   4   -5.20   17.70
   9   8   4   29.30   23.50
 -10   9   4   50.59   16.30
  -9   9   4   23.20   13.90
   9   9  -4   -5.30   16.80
  -8  -9   4   48.80   12.00
  -8   9   4   59.99   15.00
   8   9  -4    2.50   15.60
  -7  -9   4   27.30    9.30
  -7   9   4    0.80    8.70
   7   9  -4    3.00   13.50
  -6  -9   4    2.20    6.60
   6   9  -4  -12.90    9.80
  -6   9   4   -3.20    6.70
  -5  -9   4   66.99   12.70
  -5  -9   4   66.39    8.50
  -5   9   4  109.09   15.60
   5   9  -4   68.39   17.10
  -4  -9   4    2.60    2.60
  -4  -9   4    1.10    5.30
   4   9  -4    6.50    8.50
  -4   9   4    4.70    6.20
  -3  -9   4  107.19   15.10
  -3  -9   4  122.49   11.70
  -3   9   4  115.79   15.80
   3   9  -4  129.19   17.10
  -2  -9   4  107.89   13.90
  -2  -9   4   98.49   10.40
  -2   9   4   99.39   13.40
   2   9  -4  113.69   13.90
  -1  -9   4   15.50    5.70
  -1  -9   4   13.60    3.90
  -1   9   4   28.70    7.30
  -1   9   4   19.50    4.60
   1   9  -4   14.50    5.20
   0  -9   4  145.49   14.70
   0  -9   4  130.09   13.60
   0   9  -4  145.09   14.70
   0   9   4  137.39   13.40
   0   9   4  139.39   17.70
   1  -9   4  157.68   16.60
   1  -9   4  185.08   16.60
   1   9   4  220.58   23.90
  -1   9  -4  160.88   17.90
   1   9   4  164.48   15.90
   2  -9   4  411.66   39.50
   2  -9   4  476.45   38.30
   2   9   4  434.76   38.50
  -2   9  -4  426.46   41.10
   2   9   4  452.75   44.40
   3  -9   4  455.85   41.20
   3   9   4  481.25   39.80
   3   9   4  379.06   45.90
   4  -9   4  273.57   25.60
   4  -9   4  227.88   33.10
   4   9   4  264.07   24.00
   4   9   4  227.58   34.20
   5  -9   4   -4.70   10.40
   5  -9   4   -1.70    4.80
   5   9   4   -6.30   10.70
   5   9   4   -1.60    3.50
   6  -9   4   -4.10   11.30
   6   9   4  -14.20   11.20
   7  -9   4   22.90   17.70
   7   9   4   18.30   18.80
   8  -9   4  210.88   39.50
   8   9   4  173.78   36.40
   9   9   4   22.70   22.50
 -10  10   4   36.00   15.90
   9  10  -4   64.59   23.40
  -9  10   4   43.70   15.70
  -8 -10   4   99.09   17.60
   8  10  -4   89.39   24.10
  -8  10   4   91.59   19.40
  -7 -10   4  102.39   17.30
   7  10  -4  136.29   27.20
  -7  10   4  132.49   21.00
  -6 -10   4   -3.00    6.60
   6  10  -4   -1.50   11.90
  -6  10   4   13.80    7.80
  -5 -10   4   29.40    4.90
  -5 -10   4   36.70    9.20
   5  10  -4   30.40   13.20
  -5  10   4    7.70    7.70
  -4 -10   4  546.85   50.59
  -4 -10   4  542.65   47.30
  -4  10   4  555.44   50.89
   4  10  -4  566.84   52.79
  -3 -10   4  674.03   64.09
  -3 -10   4  737.23   61.49
   3  10  -4  740.23   65.29
  -3  10   4  730.43   64.39
  -2 -10   4   50.29    6.00
  -2 -10   4   30.60    8.10
   2  10  -4   48.10    9.20
  -2  10   4   38.60    8.40
  -1 -10   4   56.09    9.60
  -1 -10   4   62.79    7.30
  -1  10   4   46.60    9.50
  -1  10   4   50.29    7.40
   1  10  -4   54.59    8.70
   0 -10   4  257.67   24.00
   0 -10   4  263.37   23.40
   0  10  -4  226.78   23.80
   0  10   4  260.67   22.90
   0  10   4  265.07   26.70
   1 -10   4 1899.41  158.08
   1 -10   4 1954.40  158.48
  -1  10  -4 1907.11  159.28
   1  10   4 1739.43  161.38
   1  10   4 1856.01  157.58
   2 -10   4 1096.29   90.29
   2 -10   4 1071.49   91.59
  -2  10  -4 1072.69   92.89
   2  10   4  985.40   95.49
   2  10   4 1071.89   90.39
   3 -10   4    0.20    4.10
   3  10   4    6.50    3.30
   3  10   4   13.90   11.30
  -3  10  -4    6.10    7.40
   4 -10   4   78.19   11.80
   4  10   4   91.19   10.20
   4  10   4   67.59   17.80
   5 -10   4   53.19   10.30
   5 -10   4   45.20   17.80
   5  10   4   61.89    8.70
   5  10   4   79.09   20.10
   6 -10   4  326.37   44.70
   6  10   4  291.47   43.10
   7 -10   4   75.89   23.10
   7  10   4   84.39   25.60
   8  10   4   14.40   19.00
   9  10   4   32.70   20.10
  -9  10  -4   16.10   13.40
 -10  11   4  110.19   25.10
   9  11  -4  126.19   32.60
  -9  11   4  187.78   29.30
  -8 -11   4   10.50    8.10
   8  11  -4   25.10   18.90
  -8  11   4   -0.10    8.30
  -7 -11   4    5.00    7.90
  -7  11   4   12.70    9.70
   7  11  -4   12.60   14.40
  -6 -11   4  225.48   25.90
  -6  11   4  194.88   25.30
   6  11  -4  138.49   27.90
  -5 -11   4  253.47   27.80
  -5 -11   4  219.68   20.90
  -5  11   4  246.58   28.40
   5  11  -4  235.28   30.60
  -4 -11   4  208.88   18.90
  -4 -11   4  201.48   24.00
   4  11  -4  206.78   26.70
  -4  11   4  207.88   24.70
  -3 -11   4   35.50    5.30
  -3 -11   4   37.90    9.00
  -3  11   4   49.20   10.40
   3  11  -4   47.00   10.60
  -2 -11   4  338.67   29.90
  -2 -11   4  339.17   32.30
   2  11  -4  332.67   32.30
  -2  11   4  353.86   32.80
  -1 -11   4  313.27   27.30
  -1 -11   4  311.67   29.10
  -1  11   4  297.07   27.70
   1  11  -4  302.37   28.70
  -1  11   4  311.77   30.20
   0 -11   4  773.62   67.29
   0 -11   4  805.82   66.69
   0  11   4  743.83   69.39
   0  11   4  783.52   66.39
   0  11  -4  763.32   67.29
   1 -11   4  260.37   23.70
   1 -11   4  227.98   23.40
  -1  11  -4  255.67   25.10
   1  11   4  284.67   28.20
   1  11   4  262.87   22.90
   2 -11   4  140.29   13.70
   2 -11   4  121.69   15.30
   2  11   4  106.29   19.90
   2  11   4  146.99   13.40
  -2  11  -4  161.88   19.10
   3 -11   4  337.57   32.20
   3  11   4  434.76   44.60
   3  11   4  341.27   30.40
  -3  11  -4  324.07   34.40
   4 -11   4  442.86   40.50
   4  11   4  426.86   38.60
   4  11   4  479.15   53.29
  -4  11  -4  445.26   43.30
   5 -11   4    4.70    5.60
   5  11   4    4.10   12.30
  -5  11  -4   -4.30    6.30
   6  11   4   29.10   15.40
   7  11   4   90.49   23.80
  -8  11  -4  194.58   29.40
   8  11   4  200.28   38.70
  -9  11  -4   69.69   20.60
   9  11   4  101.89   32.20
 -10  12   4   -5.70   11.40
  -9  12   4    8.70   11.60
   9  12  -4   25.30   19.80
  -8 -12   4  149.49   20.70
  -8  12   4  122.89   23.30
   8  12  -4  108.59   28.10
  -7 -12   4   93.29   16.30
   7  12  -4  102.29   24.60
  -7  12   4   86.19   18.00
  -6 -12   4   -3.60    6.80
  -6  12   4    8.90    8.00
   6  12  -4   -2.80   12.60
  -5 -12   4   36.80   10.20
  -5  12   4   33.90   10.30
   5  12  -4   33.20   13.50
  -4 -12   4   16.40    7.20
  -4 -12   4    4.90    2.60
  -4  12   4    1.50    6.50
   4  12  -4    5.30    8.90
  -3 -12   4  189.58   20.20
  -3 -12   4  131.29   13.40
  -3  12   4  161.48   19.70
   3  12  -4  146.39   19.80
  -2 -12   4    2.50    2.60
  -2 -12   4   -0.80    5.20
  -2  12   4   -3.30    5.60
   2  12  -4   12.10    6.50
  -1 -12   4   72.19   10.40
  -1 -12   4   51.99    7.40
   1  12  -4   56.79    9.90
  -1  12   4   63.79   11.60
  -1  12   4   65.79    8.60
   0 -12   4  290.17   28.40
   0 -12   4  300.57   29.40
   0  12  -4  332.97   29.90
   0  12   4  353.96   28.50
   0  12   4  308.47   32.30
   1 -12   4  645.54   52.89
   1 -12   4  607.04   52.99
   1  12   4  607.94   57.09
  -1  12  -4  588.24   53.99
   1  12   4  582.24   51.89
   2 -12   4 1494.85  127.59
   2 -12   4 1537.75  126.69
  -2  12  -4 1518.85  129.19
   2  12   4 1486.25  126.19
   2  12   4 1434.16  131.99
   3 -12   4  103.99   13.30
  -3  12  -4   91.39   15.40
   3  12   4  100.29   10.80
   3  12   4   96.39   19.80
   4 -12   4   82.19   11.90
   4  12   4   60.29   17.60
  -4  12  -4   75.49   15.30
   4  12   4   73.29    9.10
  -5  12  -4  -12.20    8.20
   5  12   4  -10.20   10.70
  -6  12  -4   53.29   14.50
   6  12   4   58.69   19.30
   7  12   4   73.99   24.40
  -7  12  -4   57.99   16.00
  -8  12  -4  -17.80    8.30
   8  12   4   14.80   19.10
   9  12   4   21.90   23.00
  -9  12  -4    9.90   12.80
 -10  13   4    0.90   11.50
  -9  13   4   43.90   15.90
   9  13  -4   62.99   23.00
  -8 -13   4   11.40    8.40
   8  13  -4  -13.30   14.90
  -8  13   4    9.70   11.50
  -7 -13   4   65.49   13.60
   7  13  -4   39.60   18.80
  -7  13   4   52.79   14.80
  -6 -13   4   -3.80    5.90
   6  13  -4    5.80   12.40
  -6  13   4   -7.10    6.50
  -5 -13   4   72.79   12.70
  -5  13   4   62.89   13.40
   5  13  -4   44.70   16.00
  -4 -13   4    5.60    2.50
  -4 -13   4    6.90    6.40
  -4  13   4   10.40    7.70
   4  13  -4    3.20    9.00
  -3 -13   4    2.70    2.40
  -3 -13   4    9.70    7.00
  -3  13   4    0.30    5.80
   3  13  -4   10.00    8.00
  -2 -13   4  164.18   14.70
  -2 -13   4  161.98   19.30
   2  13  -4  149.69   19.10
  -2  13   4  132.09   18.30
  -1 -13   4   40.10    8.00
  -1 -13   4   42.70    6.10
  -1  13   4   28.30    6.20
   1  13  -4   43.90    8.50
  -1  13   4   25.80    8.90
   0 -13   4    1.30    3.50
   0 -13   4   -2.20    4.50
   0  13  -4   -7.70    4.50
   0  13   4    5.00    3.00
   0  13   4   -4.40    6.10
   1 -13   4  171.28   17.70
   1 -13   4  177.78   17.90
   1  13   4  171.78   16.50
   1  13   4  203.48   25.40
  -1  13  -4  187.88   19.50
   2 -13   4   33.90    7.00
   2 -13   4   30.30    5.80
  -2  13  -4   40.10    9.80
   2  13   4   34.30   12.90
   2  13   4   35.60    5.20
   3 -13   4  229.58   23.90
  -3  13  -4  237.18   28.00
   3  13   4  219.78   32.90
   3  13   4  249.58   21.80
   4 -13   4   20.70    6.70
   4  13   4   18.20    4.30
  -4  13  -4    7.10    8.30
   4  13   4   24.70   15.00
  -5  13  -4   26.50   11.80
   5  13   4   52.39   17.70
   6  13   4   32.30   17.40
  -6  13  -4   45.10   14.30
  -7  13  -4  -21.60    8.70
   7  13   4   13.70   15.90
  -8  13  -4    6.90   12.70
   8  13   4    7.60   19.90
   9  13   4   26.30   20.70
  -9  13  -4   13.00   14.40
 -10  14   4   -0.40    9.50
  -9  14   4   68.89   18.60
   9  14  -4   58.39   25.00
  -8 -14   4    9.40    8.20
   8  14  -4   24.20   18.00
  -8  14   4   27.00   13.50
  -7 -14   4   38.90   11.20
  -7  14   4   66.69   16.30
   7  14  -4   64.79   20.60
  -6 -14   4   -5.70    6.10
  -6  14   4   13.80    9.50
   6  14  -4    0.20   11.60
  -5 -14   4   22.60    8.40
   5  14  -4   21.80   12.90
  -5  14   4   40.10   11.50
  -4 -14   4   90.89    9.50
  -4 -14   4   99.59   15.40
  -4  14   4  149.09   18.70
   4  14  -4   77.39   16.70
  -3 -14   4  228.88   25.10
  -3 -14   4  241.28   21.70
   3  14  -4  292.77   30.00
  -3  14   4  238.48   25.90
  -2 -14   4  747.13   64.69
  -2 -14   4  773.42   67.49
  -2  14   4  802.12   68.29
   2  14  -4  729.93   67.69
  -1 -14   4    0.60    3.00
  -1 -14   4    7.10    5.70
   1  14  -4    4.20    5.70
  -1  14   4    7.30    7.50
  -1  14   4   -0.70    3.50
   0 -14   4  385.06   33.30
   0 -14   4  366.36   34.30
   0  14   4  327.27   36.90
   0  14   4  383.16   33.00
   0  14  -4  375.86   34.90
   1 -14   4    4.50    4.30
   1 -14   4    8.50    4.80
   1  14   4    2.50    2.90
  -1  14  -4   11.60    6.90
   1  14   4    9.40    8.40
   2 -14   4  155.28   16.10
   2 -14   4  176.88   17.30
   2  14   4  154.58   15.10
  -2  14  -4  149.29   19.80
   2  14   4  211.68   27.00
   3 -14   4  116.29   14.40
   3  14   4  107.39   20.80
   3  14   4  111.39   11.20
  -3  14  -4  112.49   17.60
   4 -14   4    9.90    5.80
   4  14   4   38.10   15.70
  -4  14  -4   16.50    9.20
  -5  14  -4   47.70   13.70
   5  14   4   71.79   21.20
  -6  14  -4    0.70   10.20
   6  14   4   -0.30   13.60
   7  14   4    6.20   16.10
  -7  14  -4   -0.70   10.10
   8  14   4    4.70   17.10
  -8  14  -4   21.30   15.70
  -9  14  -4   39.90   16.70
   9  14   4   50.59   23.90
 -10  15   4   39.50   16.50
  -9  15   4   19.40   13.30
   9  15  -4   26.60   22.00
  -8 -15   4    5.40    8.00
  -8  15   4    8.40    8.90
   8  15  -4    8.80   15.30
  -7 -15   4  211.08   25.50
   7  15  -4  157.38   31.10
  -7  15   4  136.39   23.70
  -6 -15   4  192.68   24.10
   6  15  -4  156.88   27.80
  -6  15   4  147.49   23.40
  -5 -15   4  146.59   20.20
  -5  15   4  143.19   21.20
   5  15  -4  145.59   24.70
  -4 -15   4  107.19   16.50
   4  15  -4  144.09   21.60
  -4  15   4  116.29   17.90
  -3 -15   4   -4.70    4.60
  -3 -15   4   -2.10    2.20
   3  15  -4   -7.10    7.10
  -3  15   4  -13.70    4.80
  -2 -15   4  538.55   49.99
  -2 -15   4  571.64   47.10
  -2  15   4  524.05   50.69
   2  15  -4  525.95   50.49
  -1 -15   4  128.29   12.60
  -1 -15   4  114.59   15.80
  -1  15   4  144.89   19.10
  -1  15   4  121.59   13.70
   1  15  -4  118.89   16.10
   0 -15   4   59.99    9.40
   0 -15   4   44.10    7.70
   0  15  -4   53.99   10.00
   0  15   4   70.89   13.80
   0  15   4   57.09    7.60
   1 -15   4   18.80    5.50
   1 -15   4   11.50    5.10
   1  15   4   20.40    4.40
  -1  15  -4   22.10    7.80
   1  15   4   28.50   10.70
   2 -15   4   63.69    9.80
   2  15   4   70.39    7.50
   2  15   4   54.49   15.00
  -2  15  -4   32.30   10.60
   3 -15   4  759.62   66.59
   3  15   4  802.82   73.49
   3  15   4  728.63   64.29
  -3  15  -4  775.42   69.09
   4 -15   4   30.40    7.50
  -4  15  -4   28.70   11.20
   4  15   4   14.70   14.10
   5  15   4   10.50   14.80
  -5  15  -4   49.30   12.90
   6  15   4   -6.30   10.80
  -6  15  -4    1.70   10.00
  -7  15  -4   63.29   17.40
   7  15   4   69.99   22.90
  -8  15  -4   79.69   20.70
   8  15   4   44.80   23.40
   9  15   4   35.70   24.00
  -9  15  -4   25.90   16.70
 -10  16   4   19.50   13.90
  -9 -16   4   76.39   18.30
   9  16  -4   51.59   37.90
  -9  16   4  135.69   24.90
  -8 -16   4  119.99   18.90
  -8  16   4   96.59   19.50
   8  16  -4   56.29   23.20
  -7 -16   4  117.59   19.10
   7  16  -4  116.99   25.60
  -7  16   4   81.69   18.80
  -6 -16   4   24.60    9.40
   6  16  -4   22.00   14.50
  -6  16   4   14.90   11.00
  -5 -16   4  122.99   18.80
   5  16  -4  106.29   22.20
  -5  16   4  145.99   20.70
  -4 -16   4  133.99   21.00
  -4  16   4  217.08   25.30
   4  16  -4  219.48   27.40
  -3 -16   4  496.45   46.60
  -3 -16   4  497.95   42.90
   3  16  -4  483.85   48.10
  -3  16   4  524.75   47.80
  -2 -16   4   93.89   14.60
  -2 -16   4  113.49   11.20
  -2  16   4  128.39   17.80
   2  16  -4  102.39   16.20
  -1 -16   4    0.00    2.80
  -1 -16   4    0.60    4.70
  -1  16   4    4.50    6.90
   1  16  -4   -3.50    5.60
  -1  16   4   -0.90    3.60
   0 -16   4  183.28   19.50
   0 -16   4  162.58   16.40
   0  16   4  156.08   15.80
   0  16   4  178.58   22.90
   0  16  -4  149.29   19.10
   1 -16   4 1071.39   93.99
   1 -16   4 1080.59   94.29
  -1  16  -4 1104.89   95.79
   1  16   4 1124.89   98.99
   1  16   4 1112.49   92.99
   2 -16   4   12.10    5.50
  -2  16  -4   -1.00    6.60
   2  16   4    6.50    2.90
   2  16   4    8.60   10.30
   3 -16   4   43.70    8.40
   3  16   4   73.39   18.00
  -3  16  -4   68.49   12.40
   3  16   4   38.40    5.80
   4 -16   4   14.00    6.80
   4  16   4    3.20   11.20
  -4  16  -4   12.60    8.10
   5  16   4   75.79   21.00
  -5  16  -4   87.29   18.10
  -6  16  -4  100.69   19.80
   6  16   4   93.29   25.20
  -7  16  -4   22.80   13.10
   7  16   4   24.10   19.40
  -8  16  -4   16.80   14.40
   8  16   4    4.20   16.20
  -9  16  -4   56.09   19.30
   9  16   4   23.20   25.30
 -10  17   4   -3.20    9.70
  -9 -17   4   23.00   10.50
  -9  17   4   26.80   13.40
  -8 -17   4   -0.60    7.70
   8  17  -4   -5.20   16.60
  -8  17   4    7.00   10.00
  -7 -17   4  118.99   19.30
   7  17  -4   96.49   24.50
  -7  17   4  104.49   21.30
  -6 -17   4  259.87   30.80
   6  17  -4  254.37   37.30
  -6  17   4  235.78   31.60
  -5 -17   4   52.59   12.30
   5  17  -4   27.10   14.90
  -5  17   4   87.89   15.70
  -4 -17   4    9.30    6.90
   4  17  -4   16.50   11.00
  -4  17   4    3.70    7.20
  -3 -17   4   13.20    3.20
  -3 -17   4    6.60    5.90
   3  17  -4   20.80    9.50
  -3  17   4    3.50    7.40
  -2 -17   4  146.69   14.30
  -2 -17   4  124.69   18.10
  -2  17   4  223.88   23.40
   2  17  -4  144.89   19.90
  -1 -17   4  191.58   20.30
  -1 -17   4  146.09   15.00
   1  17  -4  143.29   19.20
  -1  17   4  150.88   15.70
  -1  17   4  157.88   21.10
   0 -17   4    4.50    3.80
   0 -17   4   -7.30    4.40
   0  17  -4    3.70    5.80
   0  17   4   -1.40    2.90
   0  17   4   -0.50    8.30
   1 -17   4   13.10    5.30
   1 -17   4    7.10    4.50
   1  17   4    5.40    3.10
   1  17   4    7.70   10.10
  -1  17  -4   -0.90    6.10
   2 -17   4  321.57   32.10
  -2  17  -4  364.66   34.70
   2  17   4  349.37   30.20
   2  17   4  335.27   40.90
   3 -17   4   76.79   11.60
  -3  17  -4   65.59   14.50
   3  17   4   84.79   19.50
  -4  17  -4   42.70   12.20
   4  17   4   17.60   15.60
   5  17   4    1.60   14.70
  -5  17  -4   -4.80    7.90
   6  17   4   -2.70   12.50
  -6  17  -4   -4.90    9.70
  -7  17  -4   28.90   14.20
   7  17   4   15.70   20.30
   8  17   4   49.99   22.60
  -8  17  -4   53.29   18.50
  -9  17  -4   21.30   17.30
   9  17   4   18.00   23.40
 -10  18   4   -8.90   11.00
  -9 -18   4   -8.60    7.40
  -9  18   4    5.70   12.80
  -8 -18   4    9.40    8.80
   8  18  -4   14.20   17.20
  -8  18   4   -3.20   10.20
  -7 -18   4   23.80   10.70
   7  18  -4   29.10   17.00
  -7  18   4   38.40   13.00
  -6 -18   4   45.50   13.80
  -6  18   4  122.39   19.70
   6  18  -4   80.19   20.70
  -5 -18   4  103.99   17.00
  -5  18   4  109.59   19.10
   5  18  -4   85.89   20.60
  -4 -18   4    3.00    6.90
   4  18  -4   -0.90    9.90
  -4  18   4    8.50    7.50
  -3 -18   4    5.70    3.10
  -3 -18   4    7.20    6.50
   3  18  -4   17.30   10.00
  -3  18   4    1.80    8.00
  -2 -18   4   74.99   12.80
  -2 -18   4   75.69    8.80
  -2  18   4   82.89   15.20
   2  18  -4   77.79   14.60
  -1 -18   4   -1.60    3.00
  -1 -18   4   -4.90    5.40
  -1  18   4   -0.40    3.60
  -1  18   4    8.30    8.50
   1  18  -4   11.90    7.60
   0 -18   4  139.39   16.10
   0 -18   4  207.68   20.80
   0  18   4  158.28   16.00
   0  18   4  187.98   24.30
   0  18  -4  171.48   20.70
   1 -18   4  190.98   19.30
   1 -18   4  175.98   18.30
  -1  18  -4  172.38   21.80
   1  18   4  183.28   17.20
   1  18   4  187.28   26.30
   2 -18   4   -0.40    4.60
   2  18   4    1.70    2.60
   2  18   4   10.00   10.50
  -2  18  -4   -4.00    6.70
   3 -18   4   24.10    7.00
  -3  18  -4   31.30   10.10
   3  18   4   30.70   13.70
   4  18   4    7.00   12.10
  -4  18  -4    2.90    9.30
   5  18   4   17.30   16.40
  -5  18  -4   15.10   10.30
   6  18   4   49.50   19.80
  -6  18  -4   74.39   18.40
   7  18   4   -2.90   15.50
  -7  18  -4   13.10   12.70
  -8  18  -4   36.00   15.40
   8  18   4    8.90   16.90
   9  18   4   12.60   23.10
  -9  18  -4   -1.60   13.50
  -9 -19   4   20.10   11.40
  -9  19   4    3.90   10.40
  -8 -19   4   12.50    9.40
   8  19  -4    9.00   18.70
  -8  19   4    4.00    9.00
  -7 -19   4   20.30   10.10
   7  19  -4   -7.90   14.00
  -7  19   4   20.20   11.80
  -6 -19   4   61.29   14.10
   6  19  -4   27.80   16.40
  -6  19   4   61.99   15.00
  -5 -19   4   -2.90    5.90
   5  19  -4   11.10   12.50
  -5  19   4    1.40    8.20
  -4 -19   4    8.70    7.40
   4  19  -4   -2.90    9.70
  -4  19   4   -5.10    6.70
  -3 -19   4   15.60    7.60
   3  19  -4    0.20    8.10
  -3  19   4    4.60    7.40
  -2 -19   4   77.29    9.10
  -2 -19   4   76.19   13.00
  -2  19   4   92.59   16.00
   2  19  -4   63.69   14.10
  -1 -19   4   26.40    8.10
  -1 -19   4   15.00    4.30
  -1  19   4   10.30    9.80
   1  19  -4   13.60    8.70
   0 -19   4  192.38   18.40
   0 -19   4  159.18   20.50
   0  19   4  174.18   25.30
   0  19   4  184.38   17.90
   0  19  -4  213.68   23.90
   1 -19   4   12.40    5.80
   1 -19   4   15.40    5.40
  -1  19  -4    2.80    6.80
   1  19   4   17.80   10.80
   1  19   4    6.10    3.40
   2 -19   4   25.40    6.80
   2  19   4   17.40    3.90
  -2  19  -4   22.70    9.60
   2  19   4   11.30   12.10
   3 -19   4   18.40    6.80
  -3  19  -4   16.90    9.90
   3  19   4   13.70   13.00
   4  19   4   88.79   22.50
  -4  19  -4  132.69   20.70
  -5  19  -4   30.00   11.50
   5  19   4   29.90   15.70
   6  19   4    9.60   13.90
  -6  19  -4   -5.90    9.60
  -7  19  -4   20.90   14.30
   7  19   4   42.30   21.90
   8  19   4   23.00   20.40
  -8  19  -4   32.20   15.40
  -9  19  -4   -3.40   10.70
   9  19   4  -14.50   17.00
  -9 -20   4   53.69   14.80
  -9  20   4   28.90   15.70
  -8 -20   4  122.39   20.80
  -8  20   4  108.59   21.60
   8  20  -4  112.39   27.70
  -7 -20   4    5.30    8.40
  -7  20   4    3.70   10.00
   7  20  -4    1.90   14.20
  -6 -20   4   26.70   10.00
   6  20  -4   12.10   15.10
  -6  20   4    8.10   10.60
  -5 -20   4  241.38   25.70
  -5  20   4   89.89   20.00
   5  20  -4  164.28   26.90
  -4 -20   4  286.37   31.50
   4  20  -4  359.96   39.40
  -4  20   4  277.57   34.20
  -3 -20   4   65.19   12.70
   3  20  -4   44.40   13.00
  -3  20   4   35.00   11.80
  -2 -20   4    2.50    6.40
  -2 -20   4    7.00    3.30
   2  20  -4   17.70    9.40
  -2  20   4   10.70    8.30
  -1 -20   4    0.30    3.20
  -1 -20   4    0.80    4.90
  -1  20   4    8.10    8.70
   1  20  -4  -10.20    5.90
   0 -20   4  498.75   43.50
   0 -20   4  429.46   44.80
   0  20   4  499.15   43.10
   0  20   4  494.95   49.40
   0  20  -4  524.25   46.80
   1 -20   4   64.69   10.50
   1 -20   4   41.30    8.40
   1  20   4   60.79    7.40
  -1  20  -4   44.20   10.90
   1  20   4   29.90   12.10
   2 -20   4  274.07   28.60
   2  20   4  300.97   38.40
  -2  20  -4  334.27   32.30
   2  20   4  295.07   26.50
  -3  20  -4   55.59   13.90
   3  20   4   90.29   19.90
  -4  20  -4   24.70   11.90
   4  20   4   18.80   13.70
   5  20   4   22.60   15.60
  -5  20  -4   27.30   12.30
   6  20   4    8.40   15.60
  -6  20  -4   45.40   15.00
  -7  20  -4   29.80   13.90
   7  20   4   50.79   22.80
  -8  20  -4   -8.10   10.40
   8  20   4  -13.50   16.90
  -9 -21   4    2.00    9.30
  -9  21   4   -1.90   11.30
  -8 -21   4   14.20   10.40
   8  21  -4   11.80   16.70
  -8  21   4   -6.80    9.10
  -7 -21   4   44.90   13.20
  -7  21   4   45.30   15.80
   7  21  -4   50.79   19.60
  -6 -21   4  178.98   24.60
  -6  21   4  154.98   25.90
   6  21  -4  184.28   31.80
  -5 -21   4  237.18   28.10
   5  21  -4  206.08   31.90
  -5  21   4  184.08   27.60
  -4 -21   4    8.00    7.60
   4  21  -4   17.00   11.80
  -4  21   4    4.40    7.60
  -3 -21   4    2.50    6.30
   3  21  -4   12.30   10.30
  -3  21   4    0.40    7.20
  -2 -21   4  301.57   29.30
  -2 -21   4  259.67   24.60
   2  21  -4  305.47   33.50
  -2  21   4  253.87   32.00
  -1 -21   4  105.29   15.60
  -1 -21   4   89.39   11.20
   1  21  -4   86.79   15.60
  -1  21   4  106.69   18.50
   0 -21   4  180.38   18.30
   0 -21   4  167.98   21.10
   0  21   4  189.08   17.80
   0  21  -4  161.88   22.50
   0  21   4  206.48   28.20
   1 -21   4   -4.20    5.00
   1 -21   4    6.90    4.90
   1  21   4    6.20    3.30
   1  21   4   -6.20    8.10
  -1  21  -4   11.70    7.70
   2 -21   4  344.57   34.40
   2  21   4  509.25   50.49
  -2  21  -4  351.06   37.00
   3  21   4  382.86   46.20
  -3  21  -4  331.67   36.10
  -4  21  -4    8.70    9.00
   4  21   4   30.40   15.50
  -5  21  -4   -8.10    9.10
   5  21   4    4.30   12.50
   6  21   4   18.50   16.40
  -6  21  -4    6.90   11.70
  -7  21  -4   64.69   17.20
   7  21   4   37.20   20.60
   8  21   4   59.09   25.50
  -8  21  -4   85.19   21.50
  -9 -22   4   30.80   12.80
  -9  22   4   66.09   18.70
  -8 -22   4   98.99   19.00
   8  22  -4   44.20   34.50
  -8  22   4   45.50   15.90
  -7 -22   4   16.80   10.30
  -7  22   4   14.00   12.00
   7  22  -4   13.70   15.60
  -6 -22   4   20.80    9.90
  -6  22   4   29.60   13.90
   6  22  -4   14.60   14.70
  -5 -22   4   19.30    9.30
   5  22  -4   18.30   15.00
  -5  22   4   22.90   10.80
  -4 -22   4  860.81   74.69
   4  22  -4  743.33   76.99
  -4  22   4  824.22   75.89
  -3 -22   4   18.90    8.80
  -3  22   4   -7.40    7.40
   3  22  -4    3.00    9.60
  -2 -22   4   30.10    9.30
  -2  22   4   27.40   11.50
   2  22  -4   54.49   13.30
  -1 -22   4   -1.20    3.20
  -1 -22   4   -3.60    5.30
   1  22  -4   -0.50    7.80
  -1  22   4   -2.80    7.90
   0 -22   4   96.39   11.90
   0 -22   4   91.99   13.70
   0  22   4   76.69   17.20
   0  22   4   91.89   11.20
   0  22  -4   71.19   14.40
   1 -22   4  206.38   23.40
   1 -22   4  182.08   20.10
   1  22   4  226.98   31.10
   1  22   4  206.98   18.90
  -1  22  -4  179.38   24.70
   2 -22   4   27.10    7.50
  -2  22  -4   34.80   11.50
   2  22   4   32.50   15.70
   3  22   4   37.20   17.00
  -3  22  -4    7.00    8.90
   4  22   4   38.40   17.20
  -4  22  -4    9.30    9.50
   5  22   4   48.40   20.10
  -5  22  -4   69.49   16.80
  -6  22  -4   21.80   11.90
   6  22   4   41.20   22.40
  -7  22  -4   60.19   17.70
   7  22   4   37.90   21.20
   8  22   4    0.60   16.50
  -8  22  -4    7.20   12.30
  -9 -23   4   -4.00    8.90
  -9  23   4    7.70   11.00
  -8 -23   4   22.70   11.50
  -8  23   4   14.90   12.50
  -7 -23   4   80.99   17.10
  -7  23   4   99.19   21.50
   7  23  -4   78.49   24.20
  -6 -23   4   -5.70    7.70
   6  23  -4    6.30   15.40
  -6  23   4  -10.50    9.80
  -5 -23   4   73.19   15.40
   5  23  -4   60.29   19.20
  -5  23   4   97.19   18.30
  -4 -23   4   72.19   14.90
  -4  23   4   59.29   15.40
   4  23  -4   64.49   17.40
  -3 -23   4   14.60    8.30
  -3  23   4   16.20   10.10
   3  23  -4    7.20   10.20
  -2 -23   4   24.60    9.00
   2  23  -4   37.80   12.60
  -2  23   4   40.20   13.00
  -1 -23   4   29.40    6.00
  -1 -23   4   25.30    8.50
  -1  23   4    3.10    9.00
   1  23  -4   39.90   12.00
   0 -23   4    8.10    6.70
   0 -23   4    1.80    4.30
   0  23   4    3.90    9.90
   0  23   4   10.60    4.30
   0  23  -4   11.60    8.00
   1 -23   4   79.49   12.40
   1 -23   4   85.79   13.70
   1  23   4   94.89   10.70
   1  23   4  105.79   20.20
  -1  23  -4   86.49   15.30
  -2  23  -4  124.89   20.00
   2  23   4  156.78   26.40
  -3  23  -4  135.39   22.70
   3  23   4  159.78   28.50
  -4  23  -4   21.20   11.50
   4  23   4   -9.30   11.80
   5  23   4  -21.40    9.60
  -5  23  -4    7.50   10.30
  -6  23  -4   -7.30   10.40
   6  23   4   36.20   19.20
  -7  23  -4   16.20   13.10
   7  23   4   -4.10   17.20
  -8  23  -4   53.99   18.20
   8  23   4  -22.00   14.60
  -9 -24   4   -9.00    8.30
  -9  24   4    3.40   12.40
  -8 -24   4    9.50   10.60
  -8  24   4    7.90   11.90
  -7 -24   4   54.89   15.30
   7  24  -4   34.80   20.90
  -7  24   4  107.39   21.30
  -6 -24   4   -8.80    7.80
  -6  24   4    5.20   11.00
   6  24  -4   -4.40   13.80
  -5 -24   4   13.50    8.90
  -5  24   4   -9.80    9.20
   5  24  -4    5.70   13.70
  -4 -24   4   -0.60    7.90
  -4  24   4   -4.30    7.60
   4  24  -4   28.00   14.20
  -3 -24   4  131.69   19.80
  -3  24   4  100.79   20.50
   3  24  -4  167.98   25.00
  -2 -24   4    9.80    8.50
  -2  24   4   -7.30    7.20
   2  24  -4    9.20   10.80
  -1 -24   4   86.69   14.40
  -1 -24   4   83.79   10.80
  -1  24   4   81.19   18.00
   1  24  -4   92.39   17.20
   0 -24   4   10.50    6.70
   0 -24   4    3.60    4.30
   0  24   4    0.70    3.40
   0  24   4   -2.00   10.80
   0  24  -4    6.90    8.20
   1 -24   4    1.80    4.30
   1  24   4  -19.90    9.90
  -1  24  -4    8.40    8.60
  -2  24  -4   83.99   16.10
   2  24   4  124.39   24.30
   3  24   4   11.20   13.60
  -3  24  -4   -0.30    8.20
   4  24   4   -2.80   13.80
  -4  24  -4   -2.00    8.10
   5  24   4   32.50   18.90
  -5  24  -4   40.50   15.40
  -6  24  -4   47.60   15.90
   6  24   4   16.70   17.20
  -7  24  -4    2.70   12.10
   7  24   4   18.90   18.70
  -8  24  -4   -2.80   12.70
   8  24   4    0.40   15.10
  -9 -25   4    1.50   10.10
  -9  25   4    6.40   12.20
  -8 -25   4   -0.70    8.50
  -8  25   4  -16.40    9.30
  -7 -25   4   31.00   13.10
  -7  25   4   12.80   11.10
   7  25  -4    7.40   16.50
  -6 -25   4   33.60   12.60
   6  25  -4   14.30   15.80
  -6  25   4   22.20   10.90
  -5 -25   4  143.69   23.20
  -5  25   4  155.58   24.20
   5  25  -4  138.79   27.20
  -4 -25   4   18.80    9.10
  -4  25   4    2.20    9.80
   4  25  -4    8.90   12.40
  -3 -25   4   97.29   17.50
  -3  25   4  105.49   19.50
   3  25  -4  153.38   24.20
  -2 -25   4    2.00    7.50
  -2  25   4   -5.50    8.90
   2  25  -4    3.80    9.30
  -1 -25   4   99.99   11.80
  -1 -25   4   76.99   14.60
  -1  25   4   66.49   16.90
   1  25  -4  113.79   19.70
   0 -25   4   46.40   11.60
   0 -25   4   72.59   10.10
   0  25   4   63.19   18.30
   0  25   4   60.49    9.00
   0  25  -4   52.49   13.90
   1  25   4   23.30   13.80
  -1  25  -4   22.90   10.10
  -2  25  -4   50.39   13.30
   2  25   4   51.69   19.40
   3  25   4  140.59   27.90
  -3  25  -4  129.99   21.70
  -4  25  -4  129.59   21.60
   4  25   4   65.79   21.10
   5  25   4   42.50   19.10
  -5  25  -4   32.00   12.90
  -6  25  -4    9.80   11.70
   6  25   4   18.20   19.90
  -7  25  -4   -2.30   12.00
   7  25   4   -5.20   19.00
   8  25   4   53.09   27.20
  -8  25  -4   47.40   18.70
  -8 -26   4   67.69   18.10
  -8  26   4   91.29   22.40
  -7 -26   4  124.89   20.70
  -7  26   4   98.79   22.00
   7  26  -4   51.49   23.20
  -6 -26   4   -6.50    7.60
   6  26  -4   14.00   16.80
  -6  26   4   -5.20    9.10
  -5 -26   4   26.60   11.40
  -5  26   4   18.00   11.50
   5  26  -4   43.90   17.30
  -4 -26   4   60.29   14.10
  -4  26   4   55.19   15.90
   4  26  -4   39.90   17.00
  -3 -26   4  233.58   30.20
  -3  26   4  235.28   32.00
   3  26  -4  300.17   37.00
  -2 -26   4   56.49   12.80
   2  26  -4   62.69   16.50
  -2  26   4   33.40   13.40
  -1 -26   4   61.49   13.50
   1  26  -4   93.99   17.90
  -1  26   4   67.99   17.10
   0 -26   4  215.58   27.60
   0  26   4  242.18   23.40
   0  26   4  217.18   33.00
   0  26  -4  309.37   32.90
   1  26   4   75.19   19.20
  -1  26  -4   80.09   15.90
  -2  26  -4  199.68   28.00
   2  26   4  226.48   33.90
  -3  26  -4    9.20    9.80
   3  26   4   10.70   13.80
   4  26   4    2.80   13.30
  -4  26  -4   32.10   13.30
   5  26   4  159.18   32.80
  -5  26  -4  114.69   22.20
  -6  26  -4   86.29   20.30
   6  26   4  129.19   32.20
  -7  26  -4   38.30   17.80
   7  26   4   86.89   29.20
  -8  26  -4   12.00   14.00
   8  26   4   -6.70   19.00
  -8 -27   4    1.70    9.50
  -8  27   4    1.20   11.30
  -7 -27   4    5.30   10.30
  -7  27   4    5.10   12.00
   7  27  -4   23.20   20.10
  -6 -27   4   30.30   13.00
   6  27  -4   -5.00   13.60
  -6  27   4   12.60   11.60
  -5 -27   4   39.00   13.00
   5  27  -4   57.09   19.30
  -5  27   4   47.40   14.50
  -4 -27   4    5.00    8.00
   4  27  -4    6.40   13.00
  -4  27   4   -4.60    8.10
  -3 -27   4   73.69   15.60
   3  27  -4   72.29   18.20
  -3  27   4   50.69   14.70
  -2 -27   4   99.29   17.90
  -2  27   4  117.39   21.40
   2  27  -4  137.49   23.00
  -1 -27   4  301.27   33.60
   1  27  -4  378.56   37.40
  -1  27   4  285.37   39.50
   0 -27   4   13.30    8.40
   0  27   4   12.50   13.30
   0  27  -4   29.30   12.10
   0  27   4   20.30    5.70
  -1  27  -4   11.10    9.70
   1  27   4   11.50   11.60
  -2  27  -4    7.60    9.00
   2  27   4   -3.20   13.20
   3  27   4  299.37   42.60
  -3  27  -4  281.37   36.00
  -4  27  -4  180.58   26.90
   4  27   4  121.39   29.10
   5  27   4  -17.30   16.20
  -5  27  -4   14.10   12.70
  -6  27  -4    4.60   11.20
   6  27   4   -1.10   16.50
  -7  27  -4   19.20   15.80
   7  27   4   21.20   21.20
  -8 -28   4   12.00   11.20
  -8  28   4   23.80   15.30
  -7 -28   4   40.90   13.20
  -7  28   4   21.30   13.30
  -6 -28   4   -6.20    9.00
  -6  28   4   15.60   10.70
   6  28  -4  -11.70   14.50
  -5 -28   4  -11.80    6.20
  -5  28   4   -9.50    9.80
   5  28  -4   -4.80   12.40
  -4 -28   4   17.80    9.40
  -4  28   4    4.20   10.40
   4  28  -4   14.90   14.40
  -3 -28   4   90.49   18.20
  -3  28   4   62.89   16.90
   3  28  -4  112.99   21.90
  -2 -28   4   21.40   10.80
  -2  28   4   32.30   14.50
   2  28  -4   34.90   14.30
  -1 -28   4   -4.90    6.50
   1  28  -4    7.70   10.90
  -1  28   4   -8.60    8.60
   0 -28   4    5.50    7.40
   0  28  -4   -7.70    8.90
   0  28   4   14.90   12.60
   1  28   4   15.10   13.00
  -1  28  -4   14.80   11.30
   2  28   4   -0.50   12.10
  -2  28  -4   11.50   10.50
  -3  28  -4   30.40   13.40
   3  28   4   -7.80   14.80
   4  28   4   46.50   18.70
  -4  28  -4   32.50   14.30
   5  28   4   41.10   20.40
  -5  28  -4    5.40   12.00
  -6  28  -4   13.00   12.60
   6  28   4   26.00   19.70
  -7  28  -4    1.00   13.60
   7  28   4   13.80   20.20
  -8 -29   4   -1.00    9.80
  -8  29   4    9.60   12.90
  -7 -29   4   -3.30    9.70
  -7  29   4    5.10   12.30
  -6 -29   4    0.30    9.60
  -6  29   4   -1.70   11.10
   6  29  -4    1.50   15.70
  -5 -29   4   -9.20    7.60
   5  29  -4   30.60   17.90
  -5  29   4    0.40    9.50
  -4 -29   4    7.70    9.90
   4  29  -4  -13.00   11.80
  -4  29   4   12.20   11.70
  -3 -29   4   -3.20    7.50
  -3  29   4   13.40   10.70
   3  29  -4  -10.20   11.00
  -2 -29   4    4.50    9.30
   2  29  -4  -11.40   10.00
  -2  29   4    4.80    9.80
  -1 -29   4    2.10    8.50
   1  29  -4   10.50   11.40
  -1  29   4   -4.50    9.60
   0 -29   4   92.09   15.30
   0  29   4   76.79   21.00
   0  29  -4   51.59   14.90
  -1  29  -4   12.50    9.80
   1  29   4   -1.30   11.10
  -2  29  -4   18.70   12.00
   2  29   4   30.40   18.10
   3  29   4   17.20   17.00
  -3  29  -4   25.70   12.80
   4  29   4   11.90   15.10
  -4  29  -4   14.30   11.20
  -5  29  -4   10.80   12.20
   5  29   4    8.60   18.90
  -6  29  -4   -3.60   10.60
   6  29   4   -2.70   16.80
  -7  29  -4   17.60   13.60
   7  29   4   -5.60   17.60
  -8 -30   4  -20.80    8.90
  -8  30   4  -13.30   10.00
  -7 -30   4    8.70   10.70
  -7  30   4    8.90   11.70
  -6 -30   4   43.20   13.70
   6  30  -4   -2.50   15.50
  -6  30   4   15.00   11.40
  -5 -30   4   35.80   12.10
  -5  30   4   17.30   13.50
   5  30  -4   23.10   17.60
  -4 -30   4   12.40    9.50
   4  30  -4   58.69   18.50
  -4  30   4   19.20   12.50
  -3 -30   4   96.19   19.40
   3  30  -4  120.99   24.40
  -3  30   4  119.99   22.90
  -2 -30   4   -3.10    7.60
   2  30  -4    7.10   12.80
  -2  30   4  -17.60    9.70
  -1 -30   4    2.50    8.60
   1  30  -4    1.20   11.30
  -1  30   4    6.80   13.00
   0  30   4   13.40   13.00
   0  30  -4    3.30   10.60
  -1  30  -4    0.70   11.30
   1  30   4   55.59   18.90
   2  30   4   78.19   24.00
  -2  30  -4  132.49   21.90
   3  30   4   10.50   14.10
  -3  30  -4   21.20   12.90
  -4  30  -4    4.30   11.00
   4  30   4    2.30   14.20
   5  30   4   23.60   20.00
  -5  30  -4   14.50   14.00
  -6  30  -4    8.90   12.00
   6  30   4   -2.00   17.70
   7  30   4   14.00   18.30
  -7  30  -4   18.00   14.00
  -8 -31   4   16.60   12.90
  -8  31   4  -13.90    9.90
  -7 -31   4    5.40   10.80
  -7  31   4    7.00   13.00
  -6 -31   4   21.40   12.00
   6  31  -4    2.20   16.50
  -6  31   4    5.50   11.10
  -5 -31   4   62.69   16.90
   5  31  -4   32.80   19.50
  -5  31   4   44.60   16.60
  -4 -31   4    1.10    8.40
   4  31  -4    6.00   16.00
  -4  31   4   10.00   11.40
  -3 -31   4   20.30   11.20
   3  31  -4   28.60   16.10
  -3  31   4   44.70   16.00
  -2 -31   4   35.30   12.10
  -2  31   4   22.60   14.10
   2  31  -4   34.60   16.20
  -1 -31   4   -8.80    7.70
  -1  31   4    2.80   12.80
   1  31  -4   -5.50   10.40
  -1  31   4    3.50    5.00
   0  31   4  124.39   26.00
   0  31  -4  165.18   26.10
   1  31   4    9.70   15.20
  -1  31  -4   14.40   11.90
  -2  31  -4   86.09   18.30
   2  31   4   90.49   25.20
  -3  31  -4  179.98   27.70
   3  31   4  178.68   34.20
   4  31   4   26.70   19.70
  -4  31  -4    9.70   12.70
   5  31   4    8.90   18.60
  -5  31  -4    2.40   12.90
  -6  31  -4    3.30   13.40
   6  31   4   15.00   18.60
  -7  31  -4   -3.80   12.50
   7  31   4   31.60   25.40
  -7 -32   4   13.90   11.70
  -7  32   4    1.10   11.70
  -6 -32   4    2.10    9.50
  -6  32   4    6.40   12.40
   6  32  -4   -4.00   18.80
  -5 -32   4   38.30   13.30
   5  32  -4   17.20   18.80
  -5  32   4   36.70   14.10
  -4 -32   4   59.09   15.70
   4  32  -4   80.89   21.70
  -4  32   4   83.19   19.50
  -3 -32   4  154.78   26.10
  -3  32   4  226.08   32.50
   3  32  -4  207.48   32.90
  -2 -32   4   11.00    9.60
  -2  32   4   15.20   14.60
   2  32  -4   10.90   14.10
  -1 -32   4   -7.70    8.10
   1  32  -4   -7.80   10.80
  -1  32   4   14.50   13.20
   0  32  -4   20.30   11.70
   0  32   4   67.39   20.60
  -1  32  -4   31.60   13.90
   1  32   4   24.30   14.80
  -2  32  -4  120.29   22.10
   2  32   4   99.89   25.80
  -3  32  -4    0.60   10.10
   3  32   4  -18.10   13.60
  -4  32  -4    5.40   11.30
   4  32   4    2.60   15.20
   5  32   4   54.29   23.90
  -5  32  -4   32.00   14.30
   6  32   4   27.90   22.60
  -6  32  -4   82.69   22.40
  -7 -33   4   -0.80   12.20
  -7  33   4    7.40   12.80
  -6 -33   4   29.50   13.90
  -6  33   4   -0.80   10.50
  -5 -33   4   69.59   17.20
   5  33  -4    9.50   17.30
  -5  33   4   36.00   14.90
  -4 -33   4   12.00   10.70
  -4  33   4   26.80   13.50
   4  33  -4   13.00   15.90
  -3 -33   4    9.50    9.60
   3  33  -4    5.60   13.60
  -3  33   4    3.40   10.90
  -2 -33   4   -4.90    9.00
  -2  33   4    9.00   12.10
   2  33  -4   -2.70   12.10
  -1 -33   4   47.00   13.40
  -1  33   4   71.79   20.60
   1  33  -4   22.40   14.80
   0  33  -4    6.00   11.60
   0  33   4   -2.10   11.20
   1  33   4   -9.80   10.80
  -1  33  -4   -2.30   11.30
  -2  33  -4   14.10   12.90
   2  33   4    1.40   16.30
   3  33   4   51.59   19.70
  -3  33  -4   26.80   14.30
   4  33   4   50.49   25.70
  -4  33  -4   19.60   13.50
   5  33   4  -18.30   14.20
  -5  33  -4    3.80   11.40
   6  33   4   -1.40   19.40
  -6  33  -4   -9.60   11.80
  -7 -34   4   -1.70   10.30
  -7  34   4   14.00   14.00
  -6 -34   4    6.00   11.40
  -6  34   4   -9.30   11.10
  -5 -34   4    3.90   10.10
   5  34  -4   10.50   18.40
  -5  34   4   -3.60   10.80
  -4 -34   4   23.40   11.80
  -4  34   4  -17.90    8.60
   4  34  -4   -5.20   14.50
  -3 -34   4   17.50   12.50
   3  34  -4   -1.70   13.40
  -3  34   4   15.30   12.60
  -2 -34   4   -4.70    9.10
  -2  34   4    9.80   12.90
   2  34  -4    0.90   13.70
   1  34  -4   12.10   13.80
  -1  34   4   41.60   16.90
   0  34   4   16.20   13.50
   0  34  -4   -8.10   10.20
  -1  34  -4   15.00   12.20
   1  34   4    5.10   13.50
   2  34   4    7.80   16.60
  -2  34  -4    5.30   11.40
  -3  34  -4    1.00    9.30
   3  34   4   19.60   17.00
   4  34   4   24.70   20.50
  -4  34  -4    5.80   11.20
   5  34   4   -4.30   18.70
  -5  34  -4  -15.00   10.80
  -6  34  -4    8.80   12.30
   6  34   4   13.40   20.00
  -6 -35   4   21.60   13.20
  -6  35   4   12.20   13.60
  -5 -35   4   17.70   11.90
   5  35  -4    2.50   16.00
  -5  35   4   10.90   12.60
  -4 -35   4    1.80   10.10
  -4  35   4   15.00   12.10
   4  35  -4    6.20   15.00
  -3 -35   4    4.70   10.50
  -3  35   4   -3.70   11.70
   3  35  -4   -3.40   14.30
  -2 -35   4   33.50   12.80
   2  35  -4   18.30   15.30
  -2  35   4   52.69   18.50
   1  35  -4   46.30   16.70
  -1  35   4   36.70   16.70
   0  35   4   12.30   17.60
   0  35  -4   13.50   14.10
  -1  35  -4   -1.20   11.60
   1  35   4   12.00   14.60
   2  35   4    4.10   15.90
  -2  35  -4   -4.50   11.50
  -3  35  -4   60.49   18.20
   3  35   4   41.30   20.40
   4  35   4   -0.80   20.40
  -4  35  -4   -5.90   10.90
   5  35   4    0.20   18.30
  -5  35  -4    2.10   13.10
  -6  35  -4   -7.20   12.20
   6  35   4  -25.10   14.70
  -6 -36   4   12.00   12.10
  -6  36   4  -11.00   10.80
  -5 -36   4   28.70   13.80
  -5  36   4   49.80   18.80
   5  36  -4   -5.40   15.80
  -4 -36   4  106.49   22.50
  -4  36   4  104.69   23.50
   4  36  -4   98.99   26.20
  -3 -36   4   63.89   16.70
   3  36  -4   56.79   22.20
  -3  36   4   96.09   22.80
  -2 -36   4   17.60   11.40
   2  36  -4   60.39   20.10
  -2  36   4   37.00   16.90
   1  36  -4   46.40   19.20
  -1  36   4   61.29   19.00
   0  36   4   47.90   20.60
   0  36  -4   30.40   16.10
   1  36   4   36.50   20.60
  -1  36  -4   50.49   17.70
   2  36   4   20.30   18.30
  -2  36  -4   14.50   14.70
  -3  36  -4    7.20   11.20
   3  36   4  -10.50   14.80
   4  36   4   30.30   23.30
  -4  36  -4    3.40   12.40
  -5  36  -4   23.90   14.50
   5  36   4    4.00   19.90
  -6 -37   4   36.40   16.10
  -6  37   4   72.49   20.10
  -5 -37   4   12.20   13.30
  -5  37   4   26.90   17.50
  -4 -37   4   46.10   15.90
   4  37  -4   13.10   16.40
  -4  37   4   12.50   13.80
  -3 -37   4   22.40   13.50
   3  37  -4   15.10   15.80
  -3  37   4   -1.10   11.70
   2  37  -4  113.69   25.40
  -2  37   4   53.89   21.40
  -1  37   4   16.50   14.30
   1  37  -4   57.89   19.70
   0  37  -4   36.40   15.60
   0  37   4   74.09   23.60
   1  37   4   -2.40   13.20
  -1  37  -4  -14.50   12.20
   2  37   4   26.90   18.10
  -2  37  -4    4.00   14.00
  -3  37  -4   72.99   21.00
   3  37   4   34.40   22.50
   4  37   4   14.40   18.60
  -4  37  -4    0.90   13.80
  -5  37  -4   15.50   14.60
   5  37   4    0.90   20.80
  -6 -38   4   10.40   15.50
  -5 -38   4   -3.80    9.60
  -5  38   4   10.50   14.60
  -4 -38   4   43.50   14.60
  -4  38   4   49.80   19.40
   4  38  -4   52.09   22.00
  -3 -38   4    9.10   12.90
  -3  38   4    0.90   11.60
   3  38  -4   20.30   17.00
  -2  38   4    1.80   11.70
   2  38  -4    7.40   16.10
  -1  38   4   -3.40   13.80
   1  38  -4    3.20   14.40
   0  38  -4   56.09   19.60
   0  38   4   47.50   22.20
   1  38   4    8.50   16.60
  -1  38  -4   47.20   18.90
  -2  38  -4   18.10   13.30
   2  38   4   12.70   17.10
   3  38   4   33.00   21.50
  -3  38  -4   -5.40   11.80
  -4  38  -4    0.20   13.00
   4  38   4   12.50   21.00
  -5  38  -4   13.30   15.70
   5  38   4   -4.30   18.30
  -5 -39   4   32.30   14.30
  -5  39   4    9.50   14.50
  -4 -39   4  -19.40   10.10
   4  39  -4   11.20   17.00
  -4  39   4   17.10   15.30
   3  39  -4    1.30   16.20
  -3  39   4  -18.00   11.40
   2  39  -4   25.50   18.40
  -2  39   4   -5.60   13.50
   1  39  -4    2.10   15.00
  -1  39   4    8.20   16.60
   0  39   4   -4.70   13.40
   0  39  -4   24.80   15.30
  -1  39  -4   -6.10   13.50
   1  39   4   11.80   17.60
   2  39   4  -28.60   12.80
  -2  39  -4    3.90   11.60
   3  39   4    9.50   18.30
  -3  39  -4    5.60   12.40
  -4  39  -4  -13.10   11.80
   4  39   4   -3.90   16.90
  -5 -40   4    5.60   13.40
  -5  40   4  -14.10   11.90
  -4 -40   4   17.60   14.60
   4  40  -4   26.50   20.10
  -4  40   4   28.20   17.60
  -3  40   4   -0.60   14.20
   3  40  -4   10.20   19.00
  -2  40   4   22.40   14.90
   2  40  -4   14.10   17.70
   1  40  -4  -10.90   11.40
  -1  40   4    3.10   15.00
   0  40   4   14.80   16.40
   0  40  -4  -23.40   11.40
   1  40   4    3.00   15.20
  -1  40  -4   -8.10   12.50
  -2  40  -4  -10.20   11.80
   2  40   4    0.60   17.20
   3  40   4  -10.90   16.60
  -3  40  -4  -25.40   12.50
   4  40   4  -13.30   17.60
  -4  40  -4   -4.10   11.50
  -4  41   4    3.70   14.20
  -3  41   4    9.40   15.50
   3  41  -4   58.39   22.60
   2  41  -4   28.20   19.00
  -2  41   4   27.90   17.30
   1  41  -4   16.90   17.10
  -1  41   4   -4.10   12.40
   0  41  -4  -10.50   12.20
   0  41   4  -12.00   13.00
   1  41   4    3.10   18.90
  -1  41  -4  -11.90   13.90
   2  41   4   52.79   25.10
  -2  41  -4    7.20   13.90
   3  41   4    7.80   19.70
  -3  41  -4   -3.10   13.30
  -4  42   4   33.70   20.20
  -3  42   4   -1.60   15.30
   3  42  -4   10.60   20.30
   2  42  -4   12.90   17.30
  -2  42   4    9.60   15.40
   1  42  -4  -10.50   15.10
  -1  42   4  -10.50   13.40
   0  42   4   30.50   21.40
   0  42  -4   15.90   17.60
   1  42   4   46.70   23.20
  -1  42  -4  114.79   25.40
   2  42   4   29.80   21.80
  -2  42  -4   82.39   22.20
  -3  42  -4   10.60   14.80
   3  42   4   -2.90   21.30
   3  43  -4   -1.40   18.70
  -3  43   4   -9.60   14.20
  -2  43   4   29.20   19.20
   2  43  -4   13.10   19.70
  -1  43   4   16.20   18.00
   1  43  -4   -0.60   17.10
   0  43   4    0.70   14.70
   0  43  -4    9.70   16.50
   1  43   4   12.90   17.60
  -1  43  -4   -9.40   14.20
  -2  43  -4  -14.50   13.70
   2  43   4   36.80   25.50
  -2  44   4  -10.40   14.20
   2  44  -4   -6.90   17.90
  -1  44   4   19.00   20.20
   1  44  -4   20.30   18.30
   0  44  -4    9.30   18.30
   0  44   4    0.80   13.40
  -1  44  -4   17.60   17.80
   1  44   4   -1.10   18.60
   9   0  -5   -9.40   14.80
   8   0  -5  -12.40   12.80
   7   0  -5   11.40   13.50
   6   0  -5    4.00   11.30
   5   0  -5   -2.40    8.10
  -5   0   5    1.50    4.00
  -4   0   5   -2.30    3.30
   4   0  -5    8.40    7.70
  -3   0   5    3.40    3.10
  -3   0   5    3.90    3.90
  -2   0   5    2.60    2.70
  -2   0   5   -2.80    2.60
  -1   0   5    1.00    2.90
  -1   0   5    4.40    3.30
   0   0   5   10.30    3.90
   0   0   5    3.40    5.30
   1   0   5    1.90    3.30
   1   0   5   -1.70    7.00
   2   0   5    2.20    8.50
   2   0   5   -2.10    3.20
   3   0   5  -14.40    8.90
   3   0   5    2.90    3.60
   4   0   5   21.20   12.70
   4   0   5   -6.70    3.80
   5   0   5  -17.00    8.40
   5   0   5   -0.80    3.90
   6   0   5   10.60   15.60
   6   0   5    2.70    5.40
   7   0   5  -16.60   12.50
   8   0   5    4.20   14.00
   9   0   5  -19.60   17.50
   9  -1  -5  -11.40   13.80
   9   1  -5  -12.50   14.20
   8  -1  -5  144.59   27.40
   8   1  -5   94.79   24.60
   7  -1  -5   17.90   13.80
   7   1  -5   34.10   14.30
   6  -1  -5   14.40   11.20
  -6  -1   5   -4.10    3.90
   6   1  -5   -3.40   10.80
   5  -1  -5   44.10   12.60
  -5  -1   5   66.99    9.10
  -5   1   5   54.69    9.00
   5   1  -5   41.00   13.30
  -4  -1   5  142.09   14.20
   4   1  -5  121.59   18.10
  -4   1   5  134.99   15.00
  -3  -1   5  928.81   77.49
  -3   1   5  884.51   77.49
  -3   1   5  902.31   77.49
  -2  -1   5  572.14   48.40
  -2  -1   5  547.45   49.40
  -2   1   5  598.54   48.80
  -2   1   5  558.74   49.50
  -1  -1   5    5.10    3.60
  -1   1   5    6.40    3.60
  -1   1   5    2.60    3.20
   0  -1   5   42.30    6.80
   0  -1   5   60.09    9.20
   0   1   5   49.99    7.10
   0   1   5   59.39    9.10
   1  -1   5   88.79   11.10
   1  -1   5   98.39   15.20
   1   1   5   89.89   14.70
   1   1   5  106.89   11.40
   2  -1   5   37.70   12.10
   2  -1   5   56.39    8.60
   2   1   5   71.29   14.30
   2   1   5   71.39    8.60
   3  -1   5  174.78   26.40
   3  -1   5  160.58   17.80
   3   1   5  179.38   27.30
   3   1   5  201.58   18.20
   4  -1   5   75.09   10.80
   4  -1   5   46.00   16.30
   4   1   5   97.59   20.60
   4   1   5   78.99   10.90
   5  -1   5   15.90    6.30
   5  -1   5   24.50   16.10
   5   1   5   11.20   12.70
   5   1   5   34.20    7.50
   6  -1   5   88.69   25.40
   6  -1   5   96.39   14.20
   6   1   5  106.39   14.00
   6   1   5  114.19   25.40
   7  -1   5   26.70   17.60
   7   1   5   63.39   20.80
   8  -1   5    7.40   15.10
   8   1   5   -2.80   13.80
   9  -1   5   29.70   20.80
   9   1   5   -9.60   15.80
   9   2  -5   87.69   25.10
  -8  -2   5    0.10    6.60
   8   2  -5    3.30   14.90
   7  -2  -5  195.48   31.10
   7   2  -5  240.68   34.40
   6  -2  -5  307.87   38.00
  -6  -2   5  290.97   28.20
   6   2  -5  312.57   38.10
  -5  -2   5 1059.79   94.89
   5   2  -5 1192.68   99.69
  -4  -2   5  110.09   12.80
   4   2  -5  106.09   16.30
  -4   2   5  105.29   13.00
  -4   2   5  126.39   14.80
  -3  -2   5  176.28   17.20
  -3   2   5  178.38   17.50
   3   2  -5  191.18   19.20
  -3   2   5  178.08   17.80
  -2  -2   5 1007.10   86.09
  -2  -2   5 1026.50   84.89
  -2   2   5 1043.90   85.69
  -2   2   5  959.10   86.09
  -1  -2   5  149.19   13.90
  -1   2   5  136.79   13.90
  -1   2   5  133.49   13.80
   0  -2   5  228.68   20.80
   0  -2   5  247.48   21.90
   0   2   5  213.78   22.50
   0   2   5  213.08   20.70
   1  -2   5   34.50    9.30
   1  -2   5   33.20    6.00
   1   2   5   49.70   10.40
   1   2   5   28.60    5.50
   2  -2   5  179.08   18.40
   2  -2   5  215.38   26.50
   2   2   5  180.78   24.20
   2   2   5  192.38   18.30
   3  -2   5 1182.38  105.09
   3  -2   5 1164.38   99.29
   3   2   5 1153.38  105.09
   3   2   5 1147.89   98.99
   4  -2   5   85.89   21.30
   4  -2   5  141.39   15.80
   4   2   5  162.98   16.30
   4   2   5  116.39   23.30
   5  -2   5  111.09   14.20
   5  -2   5   87.79   21.40
   5   2   5  103.19   13.70
   5   2   5   79.19   23.00
   6  -2   5    6.20   15.00
   6  -2   5   -2.50    5.00
   6   2   5   11.00   14.60
   6   2   5   -4.00    4.40
   7  -2   5   10.20   14.90
   7   2   5   16.70   17.00
   8  -2   5  251.07   41.30
   8   2   5  163.18   35.10
   9  -2   5   61.69   25.60
   9   2   5   78.09   28.40
 -10   3   5   -0.20   17.00
   9   3  -5   40.40   21.50
  -9   3   5   36.30   13.40
  -8  -3   5  168.48   23.70
   8   3  -5  168.68   31.10
  -7  -3   5  159.18   18.70
   7   3  -5  189.28   29.40
  -6  -3   5   -1.80    3.50
   6   3  -5    9.30   11.10
  -6   3   5    5.40    6.20
  -5  -3   5  166.48   17.10
  -5   3   5  173.98   21.00
   5   3  -5  168.08   24.10
  -4  -3   5  321.27   29.10
  -4   3   5  310.97   29.50
  -4   3   5  314.37   30.50
   4   3  -5  347.77   32.70
  -3  -3   5 1531.55  126.09
  -3   3   5 1444.36  126.49
  -3   3   5 1512.95  126.49
   3   3  -5 1475.75  126.99
  -2  -3   5  863.61   74.99
  -2   3   5  889.11   75.29
  -2   3   5  886.01   74.89
  -1  -3   5  144.59   15.50
  -1   3   5  164.08   16.00
  -1   3   5  179.08   15.80
   0  -3   5   40.90    6.60
   0  -3   5   53.09    8.10
   0   3   5   47.30    6.60
   0   3   5   53.69    9.50
   1  -3   5  420.96   40.80
   1  -3   5  444.06   38.40
   1   3   5  451.45   38.30
   1   3   5  405.56   41.40
   2  -3   5  128.19   19.60
   2  -3   5  117.89   14.70
   2   3   5  184.68   22.90
   2   3   5  136.99   13.70
   3  -3   5  182.68   18.10
   3  -3   5  185.68   26.80
   3   3   5  158.98   25.60
   3   3   5  177.88   17.70
   4  -3   5   11.40   12.20
   4  -3   5   -0.70    3.70
   4   3   5    8.60    4.40
   4   3   5  -21.40    8.20
   5  -3   5  123.79   16.90
   5  -3   5  138.49   28.00
   5   3   5  188.68   31.20
   5   3   5  173.68   17.90
   6  -3   5  236.28   38.80
   6  -3   5  237.58   24.50
   6   3   5  228.48   24.10
   6   3   5  305.77   42.70
   7  -3   5   28.30   18.50
   7   3   5  -21.40   12.90
   8  -3   5   18.80   17.70
   8   3   5    2.10   15.70
   9  -3   5    0.80   18.10
   9   3   5   23.30   20.70
 -10   4   5   16.60   12.80
  -9   4   5    2.40    9.70
  -8  -4   5   28.00    9.60
  -8   4   5   22.50   10.40
   8   4  -5   40.30   17.50
  -7  -4   5    9.90    5.10
  -7  -4   5   21.90    8.60
  -7   4   5   13.60    8.70
   7   4  -5   33.70   15.40
  -6  -4   5    6.20    4.20
  -6   4   5   13.10    8.00
   6   4  -5    9.60   11.40
  -5  -4   5  847.52   69.59
  -5   4   5  733.73   71.39
   5   4  -5  828.22   74.09
  -4  -4   5    1.40    2.90
   4   4  -5   -3.20    6.70
  -4   4   5   -1.20    3.60
  -4   4   5   -2.20    4.50
  -3  -4   5   -1.80    2.60
  -3   4   5    1.60    4.10
  -3   4   5   -1.50    3.30
   3   4  -5    2.20    5.50
  -2  -4   5   72.59    8.60
  -2   4   5   54.29    8.40
   2   4  -5   67.39    7.80
  -2   4   5   74.49    9.00
  -1  -4   5   24.20    5.10
  -1   4   5   21.40    4.90
  -1   4   5   29.30    6.00
   0  -4   5  127.99   13.10
   0   4   5  130.69   13.00
   0   4   5  127.59   16.00
   0   4  -5  122.79   12.30
   1  -4   5   73.09   12.50
   1  -4   5   87.09   10.20
   1   4   5   70.09    9.20
   1   4   5  110.19   15.50
   2  -4   5  162.98   17.60
   2  -4   5  202.38   25.00
   2  -4   5  175.28   16.00
   2   4   5  139.09   22.80
   2   4   5  206.88   17.60
   3  -4   5   -2.30    3.70
   3  -4   5    3.10    8.50
   3   4   5    5.70    3.90
   3   4   5   -3.50    7.90
   4  -4   5  338.97   42.50
   4  -4   5  371.26   32.70
   4   4   5  345.47   43.90
   4   4   5  330.97   31.80
   5  -4   5    0.80   10.50
   5  -4   5    0.50    5.40
   5   4   5    6.00   11.50
   5   4   5    0.40    4.50
   6  -4   5   42.50    9.30
   6  -4   5   35.00   17.10
   6   4   5   58.09   19.30
   6   4   5   42.10    8.60
   7  -4   5   75.39   23.50
   7   4   5   99.09   28.10
   8  -4   5   22.50   17.30
   8   4   5   -3.80   17.50
   9  -4   5   71.49   27.40
   9   4   5   66.89   24.10
 -10   5   5   -1.80   10.00
  -9   5   5    0.40   10.10
  -8  -5   5    2.40    7.10
   8   5  -5    8.50   14.40
  -8   5   5   -7.30    7.30
  -7  -5   5   21.30    6.10
  -7  -5   5   32.80   10.10
  -7   5   5   19.50    9.60
   7   5  -5   11.40   13.60
  -6  -5   5   14.60    4.80
   6   5  -5   19.70   11.80
  -6   5   5   10.40    7.40
  -5  -5   5   30.50    6.10
   5   5  -5   42.40   12.50
  -5   5   5   30.30    8.70
  -4  -5   5   78.49    9.50
   4   5  -5   69.89   13.60
  -4   5   5   79.59   12.00
  -3  -5   5  149.49   14.00
  -3   5   5  130.49   16.10
  -3   5   5  125.89   15.10
   3   5  -5  156.08   17.30
  -2  -5   5   29.30    5.00
   2   5  -5   26.70    5.30
  -2   5   5   28.30    6.00
  -2   5   5   29.20    5.70
  -1  -5   5  103.49   10.40
  -1   5   5   98.39   12.20
   1   5  -5   92.39    9.00
  -1   5   5   99.99   11.00
   0  -5   5    2.10    3.40
   0   5  -5    7.00    3.80
   0   5   5    4.70    3.30
   0   5   5    2.80    6.40
   1  -5   5    5.50    3.90
   1  -5   5   -0.50    6.40
   1   5   5    9.30    4.00
   1   5   5    4.20    7.70
   2  -5   5   64.69    9.50
   2  -5   5   68.89   14.40
   2  -5   5   72.69    7.50
   2   5   5   80.29   15.90
   2   5   5   49.99    7.90
   3  -5   5  182.88   19.70
   3  -5   5  175.18   26.40
   3   5   5  168.68   27.00
   3   5   5  179.98   17.50
   4  -5   5   58.89   16.30
   4  -5   5   25.80    7.10
   4   5   5   43.60   15.00
   4   5   5   42.00    7.10
   5  -5   5    4.20    5.40
   5  -5   5   20.80   14.30
   5   5   5   -4.60    4.20
   5   5   5   -2.20   12.10
   6  -5   5   25.50    7.70
   6  -5   5   37.90   16.70
   6   5   5    2.80   15.70
   6   5   5   27.70    7.10
   7  -5   5   36.50   19.40
   7   5   5   24.00   20.10
   8  -5   5   56.69   23.60
   8   5   5  100.29   29.00
   9  -5   5   22.40   21.20
   9   5   5   41.90   22.10
 -10   6   5   -6.20    9.90
  -9  -6   5    6.20   12.90
  -9   6   5    5.50   10.10
  -8  -6   5    8.00    6.90
   8   6  -5    9.70   15.40
  -8   6   5  -12.90    7.70
  -7  -6   5  182.98   22.00
   7   6  -5  124.99   25.20
  -7   6   5  125.99   21.40
  -6  -6   5   85.29   10.60
  -6  -6   5   69.19   13.00
   6   6  -5   88.09   19.00
  -6   6   5   66.29   14.20
  -5  -6   5   43.50    6.90
   5   6  -5   66.89   14.50
  -5   6   5   34.40    9.50
  -4  -6   5   32.30    5.70
  -4   6   5   32.70    7.90
   4   6  -5   23.10    9.80
  -3  -6   5    4.30    3.00
  -3   6   5    5.80    4.30
  -3   6   5    5.40    4.60
   3   6  -5   -4.70    5.60
  -2  -6   5  221.28   21.10
   2   6  -5  227.58   21.50
  -2   6   5  259.67   22.40
  -2   6   5  221.88   21.60
  -1  -6   5  146.69   14.30
  -1   6   5  169.48   16.20
   1   6  -5  146.09   13.50
  -1   6   5  133.09   14.40
   0  -6   5   77.79    8.90
   0   6   5   55.99    8.10
   0   6   5   59.69   11.00
   0   6  -5   62.19    8.00
   1  -6   5  105.89   13.00
   1  -6   5  122.99   12.20
   1   6   5  118.69   17.60
   1   6   5  123.79   12.40
   2  -6   5  295.07   29.30
   2  -6   5  264.67   24.50
   2  -6   5  246.88   22.80
   2   6   5  268.97   23.90
   2   6   5  237.18   30.80
   3  -6   5   89.79   11.40
   3  -6   5   61.89   15.40
   3   6   5   70.29   16.90
   3   6   5   84.79   10.40
   4  -6   5  155.18   16.90
   4  -6   5  134.79   25.50
   4   6   5  117.69   24.30
   4   6   5  131.09   15.30
   5  -6   5  157.58   18.50
   5  -6   5   97.49   23.90
   5   6   5  183.18   31.30
   5   6   5  169.38   17.80
   6  -6   5  125.19   26.20
   6  -6   5  128.79   17.50
   6   6   5  129.69   16.00
   6   6   5  169.88   31.20
   7  -6   5   16.60   16.40
   7   6   5   -7.50   15.30
   8  -6   5   -2.10   15.00
   8   6   5   18.10   17.50
   9  -6   5   -7.80   15.70
   9   6   5  -21.60   14.20
 -10   7   5  -13.80    9.10
  -9  -7   5   73.49   15.50
  -9   7   5   75.59   18.70
  -8  -7   5  248.48   28.50
  -8   7   5  185.48   27.20
   8   7  -5  144.39   30.70
  -7  -7   5   56.99   12.40
  -7   7   5   43.90   12.50
   7   7  -5   27.00   16.20
  -6  -7   5   42.20    6.70
  -6  -7   5   22.30    8.80
   6   7  -5   39.20   15.20
  -6   7   5   39.00   10.60
  -5  -7   5   -1.30    4.70
  -5  -7   5   -1.50    2.70
   5   7  -5    8.20    9.20
  -5   7   5    9.90    6.10
  -4  -7   5   54.89    7.80
  -4   7   5   67.29   11.10
   4   7  -5   55.19   12.70
  -3  -7   5  379.56   33.90
  -3   7   5  395.26   35.80
  -3   7   5  384.26   34.80
   3   7  -5  381.56   36.00
  -2  -7   5  411.96   35.50
  -2   7   5  391.96   36.60
   2   7  -5  416.26   36.10
  -2   7   5  393.16   36.00
  -1  -7   5   21.10    4.70
  -1   7   5   11.20    5.90
   1   7  -5   16.70    4.10
  -1   7   5   14.60    4.40
   0  -7   5  446.76   40.00
   0  -7   5  444.56   40.40
   0   7   5  457.15   39.90
   0   7  -5  446.66   39.80
   0   7   5  501.85   42.60
   1  -7   5  691.73   58.59
   1  -7   5  678.53   59.09
   1   7   5  682.63   62.49
  -1   7  -5  669.13   59.39
   1   7   5  678.63   58.49
   2  -7   5  342.87   33.60
   2  -7   5  318.87   27.50
   2  -7   5  307.77   29.20
   2   7   5  302.17   28.30
   2   7   5  314.67   33.90
   3  -7   5   65.49   15.90
   3  -7   5   61.69    9.40
   3   7   5   46.60    7.60
   3   7   5   38.40   13.40
   4  -7   5    4.00   10.70
   4  -7   5   28.70    7.20
   4   7   5   42.00   14.50
   4   7   5   28.60    5.80
   5  -7   5  317.37   40.90
   5  -7   5  292.77   27.00
   5   7   5  318.17   42.00
   5   7   5  225.88   24.80
   6  -7   5   65.19   19.00
   6  -7   5   41.80    9.90
   6   7   5   37.70   19.00
   7  -7   5   18.30   18.20
   7   7   5   50.89   22.80
   8  -7   5   48.40   22.50
   8   7   5   12.90   17.50
   9  -7   5    1.90   17.20
   9   7   5   15.40   19.20
 -10   8   5   56.39   18.30
  -9  -8   5   23.00    9.80
  -9   8   5   45.50   15.40
  -8  -8   5   37.50   11.50
  -8   8   5   37.70   13.50
   8   8  -5    8.70   15.60
  -7  -8   5   24.80   10.10
   7   8  -5   21.70   15.00
  -7   8   5   12.20    8.50
  -6  -8   5   44.80    7.70
  -6  -8   5   73.49   13.70
  -6   8   5   64.59   13.20
   6   8  -5   32.30   14.20
  -5  -8   5   91.09   15.10
  -5  -8   5  104.99   11.80
  -5   8   5   82.49   14.60
   5   8  -5  136.59   20.30
  -4  -8   5   62.89    8.20
  -4  -8   5   69.49   12.50
  -4   8   5   81.49   12.20
   4   8  -5   51.29   12.50
  -3  -8   5   49.40    6.60
  -3  -8   5   61.79   10.40
  -3   8   5   43.30    7.60
  -3   8   5   46.70    9.00
   3   8  -5   41.50    9.40
  -2  -8   5  439.96   38.90
  -2  -8   5  444.96   36.80
   2   8  -5  402.46   37.50
  -2   8   5  419.76   38.10
  -2   8   5  391.86   37.20
  -1  -8   5  329.97   31.60
  -1  -8   5  314.77   30.10
  -1   8   5  348.17   30.50
   1   8  -5  343.47   30.00
  -1   8   5  365.26   32.20
   0  -8   5  488.65   43.60
   0  -8   5  474.95   43.00
   0   8   5  495.05   45.70
   0   8  -5  507.15   43.10
   0   8   5  490.75   42.90
   1  -8   5   -2.50    3.30
   1  -8   5   -1.30    3.20
   1   8   5    4.80    3.40
   1   8   5    1.80    7.80
  -1   8  -5    3.60    5.00
   2  -8   5  515.95   44.70
   2  -8   5  515.65   46.30
   2   8   5  535.85   45.50
   2   8   5  517.05   51.19
   3  -8   5  363.26   38.50
   3  -8   5  338.87   32.70
   3   8   5  347.37   31.60
   3   8   5  414.06   44.10
   4  -8   5  339.07   44.20
   4  -8   5  378.56   35.10
   4   8   5  386.86   33.90
   4   8   5  350.06   46.00
   5  -8   5   76.19   12.50
   5  -8   5   57.49   18.40
   5   8   5   75.59   21.10
   5   8   5  112.49   12.40
   6  -8   5   66.89   12.20
   6  -8   5   45.70   18.70
   6   8   5   74.79   23.70
   7  -8   5   59.39   22.10
   7   8   5   49.70   20.50
   8  -8   5  144.59   33.60
   8   8   5  143.49   34.90
   9  -8   5   11.30   19.70
   9   8   5   28.30   22.50
 -10   9   5   16.90   12.50
  -9  -9   5  135.79   21.80
  -9   9   5  143.59   25.30
  -8  -9   5   72.59   15.30
   8   9  -5  100.39   23.50
  -8   9   5   75.59   17.10
  -7  -9   5    9.50    8.10
   7   9  -5   13.10   14.20
  -7   9   5   12.80    8.60
  -6  -9   5   77.09   14.30
   6   9  -5   32.10   14.40
  -6   9   5   59.79   13.10
  -5  -9   5    7.30    7.30
  -5  -9   5    6.00    3.40
  -5   9   5   15.60    7.10
   5   9  -5   -0.40    9.30
  -4  -9   5   95.59   11.30
  -4  -9   5  140.89   17.50
  -4   9   5  102.59   15.10
   4   9  -5  107.59   16.90
  -3  -9   5   -2.30    2.50
  -3  -9   5    4.20    5.60
  -3   9   5   -2.30    3.50
  -3   9   5    4.30    5.30
   3   9  -5   -9.00    5.40
  -2  -9   5  414.16   38.00
  -2  -9   5  432.56   35.90
  -2   9   5  395.56   36.50
  -2   9   5  419.16   37.60
   2   9  -5  375.26   36.70
  -1  -9   5   51.89    9.20
  -1  -9   5   50.49    7.40
   1   9  -5   61.59    8.10
  -1   9   5   53.69   10.00
  -1   9   5   61.69    8.30
   0  -9   5  169.68   16.70
   0  -9   5  163.78   17.50
   0   9   5  198.68   22.10
   0   9   5  173.58   16.70
   0   9  -5  169.88   17.10
   1  -9   5 1284.67  108.99
   1  -9   5 1236.78  109.29
   1   9   5 1306.17  108.79
   1   9   5 1241.98  112.69
  -1   9  -5 1341.97  110.09
   2  -9   5  189.28   19.10
   2  -9   5  181.78   17.50
   2   9   5  217.78   28.40
  -2   9  -5  218.28   22.90
   2   9   5  190.28   18.20
   3  -9   5  129.59   15.20
   3   9   5  114.59   13.10
   3   9   5  123.69   21.90
   4  -9   5   -0.80   10.20
   4  -9   5    4.40    5.20
   4   9   5    5.00    3.80
   4   9   5    1.80    9.30
   5  -9   5  337.27   31.10
   5  -9   5  372.96   45.50
   5   9   5  281.57   28.80
   5   9   5  325.27   44.80
   6  -9   5  123.09   26.60
   6   9   5   95.79   25.60
   7  -9   5   11.40   14.90
   7   9   5   48.80   19.50
   8  -9   5   60.79   23.60
   8   9   5   11.70   17.20
   9   9   5   52.49   23.50
 -10  10   5   13.40   12.30
  -9 -10   5    5.20    8.10
  -9  10   5   -7.70    9.30
  -8 -10   5   58.09   14.00
  -8  10   5   45.00   14.00
   8  10  -5   58.79   22.60
  -7 -10   5  -10.20    5.70
   7  10  -5   14.80   14.60
  -7  10   5   -0.30    8.00
  -6 -10   5   73.19   14.40
  -6  10   5   56.49   13.40
   6  10  -5   88.29   19.40
  -5 -10   5   76.49    8.90
  -5 -10   5   46.70   11.40
   5  10  -5   58.59   15.40
  -5  10   5   61.19   12.40
  -4 -10   5    9.30    6.70
  -4 -10   5    9.20    3.20
  -4  10   5    0.10    5.50
   4  10  -5    0.50    7.10
  -3 -10   5  206.38   19.00
  -3 -10   5  197.78   23.60
   3  10  -5  193.98   23.50
  -3  10   5  216.08   21.80
  -2 -10   5    0.00    2.90
  -2 -10   5    4.30    5.90
   2  10  -5   13.30    5.60
  -2  10   5   -4.50    3.80
  -2  10   5   15.90    5.90
  -1 -10   5   10.10    5.50
  -1 -10   5   12.70    4.50
  -1  10   5    9.50    6.40
   1  10  -5   30.60    6.00
  -1  10   5   26.20    5.60
   0 -10   5   94.49   11.10
   0 -10   5   93.69   12.00
   0  10  -5  106.89   12.10
   0  10   5   90.39   10.50
   0  10   5   70.29   13.60
   1 -10   5  100.99   13.00
   1 -10   5  122.19   12.30
  -1  10  -5  128.79   14.70
   1  10   5  104.29   12.10
   1  10   5   98.09   17.50
   2 -10   5   80.39    9.40
   2 -10   5   95.39   12.00
   2  10   5   89.99   10.20
   2  10   5   71.49   15.40
  -2  10  -5   74.19   12.80
   3 -10   5    4.70    4.70
   3  10   5    7.40    3.60
   3  10   5   13.40   12.20
  -3  10  -5    3.00    6.80
   4 -10   5   31.30    7.50
   4  10   5   19.70    5.10
   4  10   5   16.40   12.50
   5 -10   5    6.10    5.60
   5 -10   5   -5.60   11.00
   5  10   5  -14.50   10.00
   5  10   5    5.40    4.20
   6 -10   5   23.40   17.00
   6  10   5   -5.10   14.20
   7 -10   5  -25.10   12.10
   7  10   5    7.90   13.70
   8  10   5    1.20   18.50
   9  10   5   -3.40   16.30
  -9  10  -5    0.30   12.90
 -10  11   5    5.00   11.40
  -9 -11   5    4.50    9.00
  -9  11   5    9.30   10.70
  -8 -11   5   22.60   10.00
  -8  11   5    6.80    9.90
  -7 -11   5    7.30    8.60
  -7  11   5   20.30   10.80
   7  11  -5   26.00   15.70
  -6 -11   5   -1.20    7.70
  -6  11   5    5.80    8.20
   6  11  -5   -5.80   11.00
  -5 -11   5   24.70    4.80
  -5 -11   5   20.30    7.90
   5  11  -5   12.50   10.50
  -5  11   5   34.10    9.90
  -4 -11   5  148.69   20.20
  -4 -11   5  165.08   15.10
  -4  11   5  131.49   19.20
   4  11  -5  163.08   21.60
  -3 -11   5   47.40    6.70
  -3 -11   5   51.59   10.20
   3  11  -5   70.99   11.70
  -3  11   5   44.70    9.90
  -2 -11   5   25.50    5.00
  -2 -11   5   33.20    8.70
  -2  11   5   32.10    7.90
   2  11  -5   24.50    7.10
  -2  11   5   21.80    6.30
  -1 -11   5    1.60    5.30
  -1 -11   5    6.20    3.60
   1  11  -5   -0.90    4.30
  -1  11   5   -0.80    3.40
  -1  11   5    0.00    6.10
   0 -11   5  158.88   18.00
   0 -11   5  187.88   17.70
   0  11   5  192.08   17.40
   0  11  -5  178.58   18.10
   0  11   5  161.88   21.70
   1 -11   5  279.87   27.40
   1 -11   5  297.67   27.70
   1  11   5  320.47   32.50
   1  11   5  326.77   27.10
  -1  11  -5  282.07   28.70
   2 -11   5   15.30    4.00
   2 -11   5   23.30    6.10
  -2  11  -5    8.90    7.00
   2  11   5   12.50   10.30
   2  11   5   23.20    4.60
   3 -11   5    0.20    4.30
  -3  11  -5   -0.60    7.20
   3  11   5    5.30   11.30
   3  11   5    6.20    3.40
   4 -11   5   -7.50    4.00
   4  11   5    0.20    3.30
  -4  11  -5   -1.80    7.50
   4  11   5   12.20   12.90
   5 -11   5   -6.40    4.60
   5  11   5   -9.30   10.60
   6  11   5    3.90   15.10
   7  11   5   31.10   20.50
   8  11   5   26.30   20.60
  -8  11  -5    6.40   11.80
   9  11   5    8.90   20.10
  -9  11  -5   -6.20    9.60
 -10  12   5   60.89   18.10
  -9 -12   5   30.70   10.60
  -9  12   5    9.30   10.70
  -8 -12   5   12.70    8.60
  -8  12   5  -12.90    7.40
  -7 -12   5    8.10    7.50
  -7  12   5   15.00    9.10
   7  12  -5    3.10   14.20
  -6 -12   5   70.39   14.60
   6  12  -5   96.99   20.50
  -6  12   5  105.89   17.90
  -5 -12   5   66.69    9.90
  -5 -12   5   85.89   14.40
   5  12  -5   54.69   15.10
  -5  12   5   41.10   11.80
  -4 -12   5  136.49   13.10
  -4 -12   5  114.69   17.70
  -4  12   5  133.79   18.50
   4  12  -5  133.59   20.10
  -3 -12   5    3.50    2.90
  -3 -12   5    1.10    5.60
   3  12  -5   -8.40    5.90
  -3  12   5    2.70    6.00
  -2 -12   5   35.90    8.60
  -2 -12   5   35.10    5.80
  -2  12   5   39.60    9.30
   2  12  -5   33.90    8.30
  -2  12   5   40.80    7.50
  -1 -12   5  940.01   82.99
  -1 -12   5  977.80   84.69
  -1  12   5 1015.10   83.49
  -1  12   5 1009.80   85.99
   1  12  -5  941.31   83.79
   0 -12   5  265.47   24.70
   0 -12   5  279.47   24.10
   0  12  -5  243.68   24.50
   0  12   5  234.68   23.40
   0  12   5  266.47   29.90
   1 -12   5   90.89   10.40
   1 -12   5   60.79    9.40
   1  12   5   59.69    8.40
   1  12   5   72.19   15.60
  -1  12  -5   91.89   12.20
   2 -12   5  866.51   74.49
   2 -12   5  872.11   73.19
  -2  12  -5  826.02   75.79
   2  12   5  908.91   73.19
   2  12   5  737.53   78.49
   3 -12   5  389.86   39.80
   3  12   5  451.95   38.30
  -3  12  -5  488.55   42.60
   3  12   5  393.96   48.80
   4 -12   5  129.99   16.40
   4  12   5  115.19   13.70
   4  12   5  114.69   23.60
  -4  12  -5  172.38   21.80
   5 -12   5   23.40    7.50
   5  12   5   -2.10   12.50
  -5  12  -5   19.10   10.90
  -6  12  -5   30.80   13.20
   6  12   5   32.40   17.00
   7  12   5  106.89   28.40
  -7  12  -5  132.79   24.10
   8  12   5   59.69   22.80
  -8  12  -5   49.20   17.50
  -9  12  -5   37.00   16.40
   9  12   5    9.50   20.00
 -10  13   5   25.30   13.10
  -9 -13   5   79.99   16.40
  -9  13   5   48.40   16.90
  -8 -13   5  239.48   31.30
  -8  13   5  278.67   35.20
  -7 -13   5   52.89   13.40
   7  13  -5   39.20   17.50
  -7  13   5   78.39   17.00
  -6 -13   5   26.80    9.30
  -6  13   5   12.50    8.80
   6  13  -5   -3.30   12.10
  -5 -13   5   22.40    9.70
   5  13  -5   40.20   12.80
  -5  13   5   26.30    9.70
  -4 -13   5  343.07   33.40
  -4 -13   5  332.67   29.10
  -4  13   5  317.77   33.30
   4  13  -5  310.07   34.60
  -3 -13   5  911.81   77.29
  -3 -13   5  901.41   80.39
   3  13  -5  880.01   80.59
  -3  13   5  933.31   80.49
  -2 -13   5   75.99    9.80
  -2 -13   5   76.59   13.20
  -2  13   5   96.19   11.70
  -2  13   5  100.29   14.80
   2  13  -5  106.49   13.70
  -1 -13   5    6.60    3.80
  -1 -13   5   -9.20    4.20
   1  13  -5    8.60    5.40
  -1  13   5   10.50    7.00
  -1  13   5    5.80    4.10
   0 -13   5  303.47   28.70
   0 -13   5  326.77   29.70
   0  13   5  322.37   28.40
   0  13  -5  310.27   29.60
   0  13   5  303.47   32.60
   1 -13   5   25.80    5.90
   1 -13   5   24.70    5.80
  -1  13  -5   28.20    7.80
   1  13   5    4.20    9.60
   1  13   5   23.70    5.00
   2 -13   5  668.83   59.49
   2 -13   5  682.93   60.69
  -2  13  -5  728.83   62.49
   2  13   5  744.23   66.89
   2  13   5  674.33   59.29
   3 -13   5  181.78   21.60
   3  13   5  200.48   19.00
   3  13   5  180.48   29.50
  -3  13  -5  262.17   27.40
   4 -13   5   13.00    6.00
   4  13   5   10.30    4.10
   4  13   5    2.60   11.30
  -4  13  -5    2.80    7.60
   5 -13   5  174.98   20.70
   5  13   5  173.18   30.40
  -5  13  -5  143.49   23.20
  -6  13  -5  101.69   18.90
   6  13   5   50.69   20.10
  -7  13  -5  144.29   24.70
   7  13   5  146.39   32.90
  -8  13  -5   18.80   13.20
   8  13   5   22.80   19.30
  -9  13  -5   62.19   20.10
   9  13   5   41.40   23.50
 -10  14   5   85.89   20.40
  -9 -14   5    7.00    9.10
  -9  14   5   -1.30   10.40
  -8 -14   5   18.40    9.70
  -8  14   5   21.10   11.90
  -7 -14   5   -0.70    6.70
   7  14  -5   -3.10   12.90
  -7  14   5    6.90    9.40
  -6 -14   5   31.10   11.10
   6  14  -5   45.00   16.60
  -6  14   5   43.30   13.00
  -5 -14   5  238.78   27.30
  -5  14   5  169.68   24.90
   5  14  -5  210.38   28.20
  -4 -14   5   24.00    8.70
  -4 -14   5   23.90    4.30
   4  14  -5   10.60    9.30
  -4  14   5   18.10    8.20
  -3 -14   5   -2.20    2.60
  -3 -14   5    3.20    6.10
  -3  14   5   -8.20    5.10
   3  14  -5    1.00    6.40
  -2 -14   5  611.04   53.49
  -2 -14   5  548.95   50.39
   2  14  -5  554.44   52.79
  -2  14   5  631.54   51.79
  -2  14   5  592.84   53.99
  -1 -14   5  509.85   46.60
  -1 -14   5  508.85   44.80
  -1  14   5  510.25   48.40
  -1  14   5  518.75   45.20
   1  14  -5  508.35   46.20
   0 -14   5  110.69   13.60
   0 -14   5  130.39   15.40
   0  14  -5  115.69   15.00
   0  14   5  110.39   18.70
   0  14   5  135.09   13.80
   1 -14   5   38.60    7.20
   1 -14   5   29.00    6.50
   1  14   5   17.60   10.30
  -1  14  -5   22.50    7.90
   1  14   5   35.00    5.70
   2 -14   5    3.10    3.50
   2 -14   5   14.50    5.10
  -2  14  -5    3.40    6.60
   2  14   5    0.50    2.70
   2  14   5   -3.10    9.80
   3 -14   5  377.86   36.60
   3  14   5  466.65   49.90
  -3  14  -5  379.16   39.10
   3  14   5  393.96   34.70
   4 -14   5   33.80    8.00
   4  14   5   15.30   12.80
  -4  14  -5   16.50   10.20
   5 -14   5    4.10    6.90
  -5  14  -5   -6.00    8.00
   5  14   5    7.70   13.00
   6  14   5   47.40   20.90
  -6  14  -5   61.39   16.30
  -7  14  -5   94.39   21.00
   7  14   5   30.60   19.60
  -8  14  -5   74.89   20.40
   8  14   5   72.99   27.30
   9  14   5   40.80   23.30
  -9  14  -5   36.30   17.80
 -10  15   5   12.90   12.00
  -9 -15   5    7.10    9.40
  -9  15   5   23.40   13.00
  -8 -15   5   69.59   15.60
  -8  15   5   69.09   17.60
  -7 -15   5   12.10    9.10
   7  15  -5   11.90   14.50
  -7  15   5   18.60   10.20
  -6 -15   5   64.19   14.70
   6  15  -5   75.99   19.20
  -6  15   5   89.19   16.70
  -5 -15   5   66.99   13.80
  -5  15   5   66.69   14.20
   5  15  -5   51.39   15.50
  -4 -15   5  116.79   16.70
  -4 -15   5   93.29   10.80
  -4  15   5   96.39   16.50
   4  15  -5  112.19   18.30
  -3 -15   5  184.38   17.70
  -3 -15   5  235.58   25.10
   3  15  -5  194.28   24.00
  -3  15   5  171.88   23.00
  -2 -15   5   13.20    6.90
  -2 -15   5    9.90    3.70
   2  15  -5   12.40    6.80
  -2  15   5   16.40    5.20
  -2  15   5    4.30    6.80
  -1 -15   5   -1.40    5.10
  -1 -15   5   16.50    4.40
   1  15  -5   14.90    6.50
  -1  15   5    8.50    4.40
  -1  15   5   20.40    8.60
   0 -15   5  130.59   15.30
   0 -15   5  127.89   14.20
   0  15  -5  142.69   16.30
   0  15   5  114.29   18.30
   0  15   5  104.89   13.00
   1 -15   5   28.70    6.50
   1 -15   5   24.80    6.70
  -1  15  -5   23.50    7.90
   1  15   5   32.50    5.40
   1  15   5   37.70   12.80
   2 -15   5    1.50    3.40
   2 -15   5    9.30    4.90
   2  15   5   -3.80    2.60
   2  15   5   -1.60    9.90
  -2  15  -5    6.00    6.90
   3 -15   5  157.78   18.90
   3  15   5  198.88   29.20
   3  15   5  165.68   15.60
  -3  15  -5  131.09   21.10
   4 -15   5   -1.40    5.00
  -4  15  -5   -1.60    7.10
   4  15   5   10.70   11.80
   5 -15   5  116.09   16.30
  -5  15  -5   97.79   19.80
   5  15   5  130.99   28.20
  -6  15  -5   14.90   11.50
   6  15   5   -5.10   11.60
   7  15   5   -7.30   16.00
  -7  15  -5   49.30   16.20
  -8  15  -5   -7.40   10.30
   8  15   5   16.90   20.00
  -9  15  -5    4.10   15.80
   9  15   5    9.20   20.40
 -10  16   5   26.80   15.40
  -9 -16   5    8.40    8.70
  -9  16   5    3.80   10.90
  -8 -16   5   -3.40    7.50
  -8  16   5   35.20   13.50
  -7 -16   5   47.10   12.30
  -7  16   5   36.00   13.30
   7  16  -5   31.50   20.50
  -6 -16   5   58.79   13.70
  -6  16   5   75.89   15.90
   6  16  -5   33.90   15.70
  -5 -16   5   13.70    8.20
  -5  16   5   20.70   10.30
   5  16  -5   13.20   11.00
  -4 -16   5   73.59   13.90
   4  16  -5   69.09   16.40
  -4  16   5   87.89   15.30
  -3 -16   5    2.90    2.80
  -3 -16   5    5.60    6.40
  -3  16   5    1.30    6.60
   3  16  -5    6.30    7.00
  -2 -16   5    8.90    3.40
  -2 -16   5   -0.10    5.10
  -2  16   5   -0.80    6.50
  -2  16   5    3.10    4.30
   2  16  -5    4.90    6.70
  -1 -16   5    0.40    5.50
  -1 -16   5    2.90    3.20
   1  16  -5   -1.20    5.40
  -1  16   5    5.80    7.10
  -1  16   5    4.00    3.80
   0 -16   5   36.00    7.00
   0 -16   5   56.69    9.20
   0  16   5   26.10   10.70
   0  16   5   43.30    6.70
   0  16  -5   24.40    8.00
   1 -16   5    6.80    5.00
   1 -16   5   27.70    6.30
   1  16   5   16.00    4.20
  -1  16  -5   13.50    7.10
   1  16   5    0.80    9.60
   2 -16   5   41.10    8.30
   2 -16   5   26.50    6.30
   2  16   5   40.00    6.00
   2  16   5   30.50   12.80
  -2  16  -5   52.79   11.30
   3 -16   5    5.70    6.10
   3  16   5   19.90   12.70
  -3  16  -5   17.00    9.30
   3  16   5   21.30    4.50
   4 -16   5    8.60    5.50
   4  16   5   -3.10   12.80
  -4  16  -5   10.40    9.80
   5  16   5   15.10   13.00
  -5  16  -5    2.30    9.80
  -6  16  -5    9.60   12.30
   6  16   5    2.80   15.20
   7  16   5   18.00   18.00
  -7  16  -5    2.20   10.70
   8  16   5    0.40   18.80
  -8  16  -5    6.60   13.60
   9  16   5   -9.70   18.70
  -9  16  -5  -14.50   12.40
 -10  17   5   14.60   14.50
  -9 -17   5   27.90   11.90
  -9  17   5   28.00   14.20
  -8 -17   5   36.50   11.50
  -8  17   5   32.90   14.40
  -7 -17   5   33.90   11.90
  -7  17   5   17.10   12.00
  -6 -17   5    9.70    7.60
   6  17  -5   -0.40   12.20
  -6  17   5    5.10    9.00
  -5 -17   5   17.20    8.90
   5  17  -5   22.30   12.70
  -5  17   5   21.90    9.70
  -4 -17   5   56.39   12.30
  -4  17   5   77.19   14.80
   4  17  -5   93.79   17.30
  -3 -17   5  326.37   28.40
  -3 -17   5  291.17   31.80
   3  17  -5  336.87   33.60
  -3  17   5  312.57   32.90
  -2 -17   5  221.48   23.30
  -2 -17   5  164.68   16.40
  -2  17   5  156.88   18.40
  -2  17   5  161.48   22.90
   2  17  -5  181.58   22.00
  -1 -17   5    5.30    5.50
  -1 -17   5   12.50    4.30
   1  17  -5   15.00    7.30
  -1  17   5    0.20    7.60
  -1  17   5   19.10    5.10
   0 -17   5   -0.60    3.40
   0 -17   5    6.60    5.40
   0  17   5    4.20    3.20
   0  17   5   17.30    8.80
   0  17  -5   10.20    6.30
   1 -17   5   27.20    6.60
   1 -17   5   38.10    7.80
  -1  17  -5   28.80    8.90
   1  17   5   70.59   16.60
   1  17   5   32.60    5.80
   2 -17   5  220.98   21.80
   2 -17   5  200.18   20.70
   2  17   5  209.78   19.60
  -2  17  -5  229.08   26.50
   2  17   5  192.78   29.80
   3 -17   5    9.80    5.50
   3  17   5   31.60   15.50
  -3  17  -5    2.60    7.40
   4 -17   5   -2.80    4.70
  -4  17  -5    2.60    8.00
   4  17   5   11.80   13.40
  -5  17  -5   -3.10    8.50
   5  17   5   14.10   15.40
   6  17   5    5.10   14.20
  -6  17  -5   38.40   13.20
  -7  17  -5   -9.00   10.90
   7  17   5   -0.90   16.80
   8  17   5   39.50   22.80
  -8  17  -5    2.80   13.70
  -9  17  -5  -23.50   11.30
  -9 -18   5   82.19   18.00
  -9  18   5   67.69   18.20
  -8 -18   5    6.40    8.30
  -8  18   5   -8.80   10.10
  -7 -18   5   55.99   13.80
  -7  18   5   15.50   10.90
  -6 -18   5   96.79   19.20
   6  18  -5  162.88   26.40
  -6  18   5  120.19   20.60
  -5 -18   5  128.89   20.10
  -5  18   5  114.89   19.70
   5  18  -5  154.08   24.70
  -4 -18   5   11.50    7.80
  -4  18   5   24.90   10.10
   4  18  -5   31.30   12.00
  -3 -18   5   14.90    8.00
  -3 -18   5    9.90    3.60
  -3  18   5    3.40    7.60
   3  18  -5    9.40    8.40
  -2 -18   5   34.10    9.10
  -2 -18   5   29.40    5.60
  -2  18   5   48.80   12.10
  -2  18   5   34.10    7.50
   2  18  -5   23.20    9.30
  -1 -18   5   64.29    8.70
  -1 -18   5   71.49   12.10
   1  18  -5   58.79   11.50
  -1  18   5   51.89    8.90
  -1  18   5   63.69   14.10
   0 -18   5  232.68   23.20
   0 -18   5  214.18   21.70
   0  18  -5  230.98   24.00
   0  18   5  216.08   28.80
   0  18   5  217.48   21.10
   1 -18   5   -3.60    4.30
   1 -18   5   -0.10    3.70
   1  18   5    6.30    3.40
  -1  18  -5   -0.30    6.10
   1  18   5    4.90    9.30
   2 -18   5   42.50    8.80
   2 -18   5   48.00    8.20
   2  18   5   47.80   16.20
   2  18   5   44.30    6.50
  -2  18  -5   28.80   10.20
   3 -18   5   33.90    8.50
  -3  18  -5   33.90   10.70
   3  18   5   18.00   13.10
   4 -18   5   61.69   11.60
  -4  18  -5   68.59   14.60
   4  18   5   84.59   21.80
   5  18   5    6.30   12.60
  -5  18  -5   -4.50    7.80
   6  18   5    4.40   16.30
  -6  18  -5   12.60   11.30
  -7  18  -5   32.50   15.40
   7  18   5  -26.70   15.00
  -8  18  -5  141.79   27.90
   8  18   5  158.38   38.20
  -9 -19   5   -1.30    8.60
  -9  19   5   -2.60   10.30
  -8 -19   5   99.89   19.10
  -8  19   5  112.49   21.90
  -7 -19   5  134.29   22.10
  -7  19   5  130.49   24.20
  -6 -19   5    2.90    8.00
  -6  19   5    7.70    8.80
   6  19  -5  -15.90   10.40
  -5 -19   5  130.59   20.10
   5  19  -5  150.68   24.90
  -5  19   5  135.29   21.00
  -4 -19   5   49.60   11.60
  -4  19   5   29.10   10.30
   4  19  -5   17.00   11.80
  -3 -19   5  603.24   53.89
  -3  19   5  610.84   55.09
   3  19  -5  508.45   54.19
  -2 -19   5  133.09   17.70
  -2 -19   5  115.19   13.00
   2  19  -5  124.69   18.20
  -2  19   5  129.39   14.80
  -2  19   5   96.99   17.80
  -1 -19   5   20.50    5.20
  -1 -19   5   16.70    7.40
   1  19  -5   11.40    7.30
  -1  19   5   15.90    5.40
  -1  19   5    9.30    8.50
   0 -19   5   21.50    5.80
   0 -19   5   19.70    7.40
   0  19   5   13.30   10.50
   0  19   5   20.50    5.30
   0  19  -5   27.80    9.00
   1 -19   5  202.68   19.90
   1 -19   5  197.68   20.40
   1  19   5  233.58   30.80
  -1  19  -5  195.88   23.40
   1  19   5  169.68   18.20
   2 -19   5  767.52   66.19
  -2  19  -5  712.93   67.79
   2  19   5  723.03   63.89
   2  19   5  823.42   73.19
   3 -19   5   13.80    6.20
  -3  19  -5   14.20    9.60
   3  19   5   13.40   12.20
   4 -19   5   17.80    6.90
  -4  19  -5   -2.00    7.10
   4  19   5    5.40   14.60
   5  19   5  -14.50   11.10
  -5  19  -5    4.40    9.70
  -6  19  -5   34.80   13.30
   6  19   5   16.00   17.20
  -7  19  -5   26.00   14.00
   7  19   5   33.60   21.40
  -8  19  -5   25.10   16.10
   8  19   5   12.80   21.00
  -9 -20   5   20.30   11.70
  -9  20   5   29.10   14.10
  -8 -20   5    7.40    9.50
  -8  20   5   11.30   11.70
  -7 -20   5   29.70   11.20
  -7  20   5   17.10   12.30
  -6 -20   5   81.79   15.40
   6  20  -5   40.30   17.40
  -6  20   5   64.09   15.80
  -5 -20   5   93.89   16.80
  -5  20   5   72.99   15.90
   5  20  -5   90.49   20.00
  -4 -20   5   -0.50    6.60
   4  20  -5  -14.90    9.30
  -4  20   5    6.90    8.50
  -3 -20   5    8.70    7.50
   3  20  -5    7.60   10.10
  -3  20   5   18.20    9.70
  -2 -20   5   44.00    6.30
  -2 -20   5   32.40    9.70
   2  20  -5   25.50   10.50
  -2  20   5   27.10   12.00
  -1 -20   5  142.59   15.10
  -1 -20   5  134.59   18.20
  -1  20   5   95.39   20.10
   1  20  -5  116.29   18.30
  -1  20   5  142.49   15.80
   0 -20   5  101.59   12.70
   0 -20   5   90.29   14.10
   0  20   5   85.49   18.20
   0  20   5   87.69   11.50
   0  20  -5  107.19   15.90
   1 -20   5   17.40    5.70
   1 -20   5   26.90    7.60
   1  20   5   29.20    5.50
  -1  20  -5   15.20    8.30
   1  20   5   18.10   12.20
   2 -20   5   24.10    7.20
   2  20   5   38.70   14.50
  -2  20  -5   35.70   10.00
   2  20   5   23.10    5.00
   3 -20   5   10.10    6.30
  -3  20  -5   17.10    9.40
   3  20   5    5.80   11.20
   4 -20   5  105.69   16.00
  -4  20  -5  116.49   19.90
   4  20   5  149.49   28.80
  -5  20  -5   47.80   14.50
   5  20   5   17.70   14.90
  -6  20  -5  -11.60   10.20
   6  20   5   -2.40   14.20
  -7  20  -5   11.00   12.30
   7  20   5   28.90   18.80
  -8  20  -5   61.99   20.90
   8  20   5   56.79   22.60
  -9 -21   5   -2.20    7.60
  -9  21   5    0.90   11.80
  -8 -21   5    1.40    8.30
  -8  21   5   -0.70    8.80
  -7 -21   5   13.40   10.40
  -7  21   5   -3.70    9.00
  -6 -21   5   13.70    9.00
   6  21  -5   14.10   13.20
  -6  21   5   38.70   13.50
  -5 -21   5   30.90   10.90
  -5  21   5   23.60   11.10
   5  21  -5   16.30   13.30
  -4 -21   5    6.20    8.20
  -4  21   5    9.40    9.30
   4  21  -5   12.30   10.70
  -3 -21   5   41.60   11.50
   3  21  -5   43.20   13.20
  -3  21   5   42.70   12.40
  -2 -21   5   17.90    8.50
  -2 -21   5    6.70    3.60
   2  21  -5   -1.20    7.50
  -2  21   5   18.40    9.50
  -1 -21   5   10.60    4.50
  -1 -21   5    2.90    5.80
  -1  21   5   -7.00    7.10
   1  21  -5   21.70    8.60
  -1  21   5   13.80    5.20
   0 -21   5   33.60    8.40
   0 -21   5   20.80    6.00
   0  21   5   20.30   11.20
   0  21  -5   37.80   10.10
   0  21   5   12.80    5.00
   1 -21   5    2.60    5.50
   1 -21   5    8.90    5.70
   1  21   5   15.40    4.50
   1  21   5    3.70   11.40
  -1  21  -5   13.40    8.20
   2 -21   5   57.99   10.10
  -2  21  -5   29.90   11.20
   2  21   5   58.99   17.30
   3 -21   5   73.79   11.80
  -3  21  -5   55.09   14.20
   3  21   5   89.29   21.50
  -4  21  -5   47.10   13.40
   4  21   5   -1.40   13.90
  -5  21  -5  -14.70    6.40
   5  21   5   -3.70   12.80
   6  21   5    0.90   16.00
  -6  21  -5    8.50   10.40
  -7  21  -5   -6.10   11.40
   7  21   5    4.60   14.70
  -8  21  -5   10.60   14.60
   8  21   5   12.50   18.80
  -9 -22   5  -11.20    8.80
  -9  22   5   26.90   15.80
  -8 -22   5   16.10   10.00
  -8  22   5    5.70   12.40
  -7 -22   5   18.30   10.40
  -7  22   5   12.90   10.50
  -6 -22   5    0.60    7.50
  -6  22   5    6.80   11.50
   6  22  -5   14.70   16.50
  -5 -22   5   33.90   11.60
  -5  22   5   47.80   14.00
   5  22  -5   63.19   17.70
  -4 -22   5   24.00    9.40
  -4  22   5   27.70   12.20
   4  22  -5   36.80   13.90
  -3 -22   5    4.40    7.40
   3  22  -5    4.10    9.40
  -3  22   5    8.50    9.30
  -2 -22   5  237.28   28.80
  -2 -22   5  257.27   23.60
  -2  22   5  228.68   31.20
   2  22  -5  284.67   31.60
  -1 -22   5   43.40    7.40
  -1 -22   5   44.20   11.20
   1  22  -5   25.80   10.90
  -1  22   5   59.29   15.00
  -1  22   5   54.19    8.60
   0 -22   5    7.40    4.50
   0 -22   5    3.90    5.80
   0  22   5    2.60    3.80
   0  22   5    4.20   10.60
   0  22  -5    8.80    7.80
   1 -22   5   -4.40    3.90
   1 -22   5   -3.00    4.90
  -1  22  -5   -7.00    6.80
   1  22   5   -0.40    3.40
   1  22   5    5.60   11.40
   2 -22   5   16.90    6.50
   2  22   5   35.40   16.40
  -2  22  -5   21.50   10.40
   3 -22   5  151.58   17.80
  -3  22  -5  105.49   19.50
   3  22   5  125.09   26.30
   4  22   5   28.90   14.80
  -4  22  -5   14.10   11.10
   5  22   5    5.50   15.40
  -5  22  -5   44.10   14.50
   6  22   5   18.40   15.80
  -6  22  -5   13.40   12.40
  -7  22  -5    8.30   13.20
   7  22   5   24.80   17.30
  -8  22  -5   13.40   14.80
   8  22   5   27.70   20.10
  -9 -23   5   57.39   16.60
  -9  23   5   57.99   18.30
  -8 -23   5   58.49   15.40
  -8  23   5   34.70   16.00
  -7 -23   5  152.48   24.10
  -7  23   5  129.29   24.70
  -6 -23   5   30.00   11.20
  -6  23   5   36.80   14.40
  -5 -23   5   44.40   12.20
  -5  23   5   52.69   14.00
   5  23  -5   31.80   15.70
  -4 -23   5  334.47   33.90
   4  23  -5  289.97   38.40
  -4  23   5  283.17   36.70
  -3 -23   5  125.59   19.90
  -3  23   5  143.69   22.50
   3  23  -5  112.29   21.30
  -2 -23   5  110.79   17.60
  -2  23   5  113.29   20.00
   2  23  -5  112.99   19.60
  -1 -23   5   14.90    7.30
  -1 -23   5   10.70    4.70
   1  23  -5   12.80    9.40
  -1  23   5    8.30    5.30
  -1  23   5    9.90   10.30
   0 -23   5  173.88   20.10
   0 -23   5  144.09   16.30
   0  23   5  130.89   15.30
   0  23   5  171.98   26.20
   0  23  -5   89.79   17.90
   1 -23   5  210.68   22.30
   1 -23   5  243.08   24.60
   1  23   5  163.88   28.20
   1  23   5  185.58   19.00
  -1  23  -5  184.68   24.80
   2 -23   5  462.25   39.50
  -2  23  -5  374.26   41.60
   2  23   5  385.96   50.69
   3 -23   5  142.69   19.90
   3  23   5  211.68   34.40
  -3  23  -5  176.78   24.60
  -4  23  -5   30.60   11.60
   4  23   5   18.30   15.60
   5  23   5   76.29   23.50
  -5  23  -5   69.09   16.70
  -6  23  -5   79.49   19.10
   6  23   5   63.19   23.40
   7  23   5   60.19   25.00
  -7  23  -5   42.60   16.90
  -8  23  -5   18.40   14.70
   8  23   5   19.90   20.10
  -9 -24   5   42.50   16.30
  -9  24   5   61.89   18.40
  -8 -24   5   -3.10    9.90
  -8  24   5   24.20   13.00
  -7 -24   5   30.50   12.60
  -7  24   5  118.99   22.30
  -6 -24   5   78.89   15.80
  -6  24   5   38.50   13.60
  -5 -24   5   82.79   17.00
  -5  24   5   89.19   19.10
   5  24  -5   98.69   22.10
  -4 -24   5   23.50   10.50
  -4  24   5   45.70   14.20
   4  24  -5   20.20   13.10
  -3 -24   5   56.29   13.20
  -3  24   5   41.50   13.80
   3  24  -5   29.20   12.50
  -2 -24   5  205.28   25.00
   2  24  -5  171.18   25.60
  -2  24   5  169.08   26.00
  -1 -24   5  363.46   36.00
  -1 -24   5  339.87   32.50
   1  24  -5  336.77   36.90
  -1  24   5  386.16   33.50
  -1  24   5  332.67   41.60
   0 -24   5   76.39   10.40
   0 -24   5   83.69   13.40
   0  24   5   46.60    8.60
   0  24   5   57.99   17.70
   0  24  -5   40.60   12.50
   1 -24   5   45.10    8.50
   1 -24   5   33.20    9.10
  -1  24  -5   31.20   10.90
   1  24   5   33.80   14.90
   2 -24   5   47.90    9.80
  -2  24  -5   54.09   13.90
   2  24   5   58.79   19.10
   3  24   5  554.24   64.99
  -3  24  -5  541.65   54.19
  -4  24  -5  273.97   33.80
   4  24   5  189.58   35.80
   5  24   5    6.60   13.40
  -5  24  -5   21.30   13.30
  -6  24  -5   -3.40   10.80
   6  24   5   -4.80   16.00
  -7  24  -5   -5.60   12.50
   7  24   5    1.80   16.10
  -8  24  -5   65.59   20.10
   8  24   5   60.39   27.00
  -9 -25   5   -8.80    9.80
  -9  25   5   -2.90   11.60
  -8 -25   5   20.00   11.90
  -8  25   5   20.40   15.30
  -7 -25   5   26.00   12.50
  -7  25   5   12.10   11.00
  -6 -25   5   21.10   11.60
  -6  25   5    6.80   10.00
  -5 -25   5   -2.40    7.20
   5  25  -5   -5.30   11.80
  -5  25   5   -1.00    8.60
  -4 -25   5    8.90    9.50
   4  25  -5   22.40   14.00
  -4  25   5   27.60   12.10
  -3 -25   5  197.28   27.30
   3  25  -5  229.68   31.70
  -3  25   5  249.48   32.20
  -2 -25   5  134.09   19.60
  -2  25   5  126.19   22.60
   2  25  -5  123.19   21.60
  -1 -25   5   10.80    5.00
  -1 -25   5   24.60    9.90
   1  25  -5   44.70   12.60
  -1  25   5   60.59   16.30
  -1  25   5   14.40    6.00
   0 -25   5   11.90    5.40
   0 -25   5    7.60    6.80
   0  25   5   12.30   12.00
   0  25   5    9.90    4.50
   0  25  -5   -4.10    7.40
   1 -25   5   40.90    8.70
   1 -25   5   35.90    9.80
   1  25   5    1.90   11.20
  -1  25  -5   30.40   11.00
   2 -25   5   85.59   13.30
   2  25   5   95.59   22.80
  -2  25  -5   64.19   15.40
   3  25   5  -17.30    9.90
  -3  25  -5   15.50   11.10
   4  25   5   35.80   19.90
  -4  25  -5   19.50   11.10
  -5  25  -5   10.60   11.20
   5  25   5    3.60   13.10
   6  25   5   31.30   19.10
  -6  25  -5   67.99   17.70
   7  25   5   15.00   17.60
  -7  25  -5   58.59   19.60
  -8  25  -5    7.80   12.90
  -8 -26   5   10.90   10.80
  -8  26   5  -15.50    9.70
  -7 -26   5   -7.20    9.00
  -7  26   5   17.30   12.60
  -6 -26   5    3.90    9.70
  -6  26   5   -6.30    8.60
  -5 -26   5   -4.50    7.20
   5  26  -5    6.80   14.20
  -5  26   5   -3.00   10.10
  -4 -26   5   28.50   11.60
  -4  26   5   21.90   11.80
   4  26  -5   32.30   14.60
  -3 -26   5    7.70    8.60
  -3  26   5   42.30   14.10
   3  26  -5   11.50   12.60
  -2 -26   5   87.19   14.80
   2  26  -5   70.69   16.30
  -2  26   5   23.00   13.90
  -1 -26   5   18.10    6.10
  -1 -26   5   28.70   10.60
   1  26  -5   27.10   11.50
  -1  26   5   23.90    6.80
  -1  26   5   40.10   14.80
   0 -26   5   -2.70    6.30
   0 -26   5    0.60    4.00
   0  26   5    5.40    4.60
   0  26  -5   -1.40    7.90
   0  26   5   15.30   11.40
   1 -26   5   -5.00    4.70
   1 -26   5   -5.20    5.70
   1  26   5    6.30   12.70
  -1  26  -5    8.80    9.10
  -2  26  -5    0.40    8.80
   2  26   5   -9.50   13.20
   3  26   5   20.80   14.60
  -3  26  -5   12.90   10.30
   4  26   5   12.40   16.70
  -4  26  -5  -12.90    9.60
  -5  26  -5    8.40   10.70
   5  26   5   -3.30   15.50
  -6  26  -5  -13.40    9.10
   6  26   5    0.10   15.30
   7  26   5  -10.10   16.10
  -7  26  -5   31.50   14.80
  -8 -27   5    8.70   10.90
  -8  27   5   -1.80   11.40
  -7 -27   5   23.80   11.00
  -7  27   5    8.20   11.60
  -6 -27   5   14.30   11.20
  -6  27   5   13.80   12.00
  -5 -27   5    1.70    8.40
  -5  27   5   -9.00    7.60
   5  27  -5   20.50   17.00
  -4 -27   5  217.68   29.60
   4  27  -5  216.98   32.90
  -4  27   5  217.88   30.40
  -3 -27   5   -1.10    7.80
   3  27  -5    1.20   11.40
  -3  27   5    6.70    9.50
  -2 -27   5   -0.60    7.10
   2  27  -5   22.30   11.70
  -2  27   5   -4.90    8.90
  -1 -27   5   13.80    8.00
  -1  27   5    9.30    5.50
   1  27  -5    1.20   10.00
  -1  27   5   -2.10   10.60
   0 -27   5    5.60    6.70
   0 -27   5   12.80    6.20
   0  27  -5   13.40    9.50
   0  27   5   13.70   11.70
   0  27   5   10.00    5.10
   1 -27   5   36.00    8.70
  -1  27  -5   32.10   11.90
   1  27   5   58.09   19.00
   2  27   5    1.60   11.80
  -2  27  -5    3.90    9.00
  -3  27  -5   93.69   18.00
   3  27   5   68.29   21.80
   4  27   5   12.50   16.40
  -4  27  -5    9.40   11.70
   5  27   5   25.40   19.10
  -5  27  -5   29.30   14.10
   6  27   5    1.30   16.90
  -6  27  -5   -6.30    9.10
   7  27   5  -12.00   14.70
  -7  27  -5   19.10   13.90
  -8 -28   5    3.50   11.30
  -8  28   5   10.20   11.70
  -7 -28   5   14.40   12.20
  -7  28   5   20.80   12.30
  -6 -28   5   24.20   10.70
  -6  28   5   34.20   14.30
  -5 -28   5    7.80    8.80
  -5  28   5    3.10   10.80
  -4 -28   5   49.10   13.90
  -4  28   5   31.60   12.40
   4  28  -5   29.90   16.00
  -3 -28   5   32.00   11.90
  -3  28   5   12.90   11.50
   3  28  -5   40.40   14.70
  -2 -28   5  326.57   36.00
   2  28  -5  335.37   41.30
  -2  28   5  386.16   45.40
  -1 -28   5    6.90    7.60
   1  28  -5   15.20   11.30
  -1  28   5    1.80   10.70
  -1  28   5   12.30    6.30
   0 -28   5   -6.90    4.00
   0 -28   5    3.30    7.40
   0  28   5   10.30   12.90
   0  28  -5  -13.00    7.50
  -1  28  -5   55.69   14.90
   1  28   5   57.89   17.80
   2  28   5   37.60   19.00
  -2  28  -5   34.40   12.80
   3  28   5  260.17   41.10
  -3  28  -5  239.78   32.30
   4  28   5  121.09   27.10
  -4  28  -5   69.69   19.00
   5  28   5    6.40   16.40
  -5  28  -5   20.80   13.70
   6  28   5  -27.40   15.20
  -6  28  -5   -3.80    9.10
  -7  28  -5   10.70   14.90
   7  28   5   40.70   22.80
  -8 -29   5   20.40   13.20
  -8  29   5  -17.10   10.50
  -7 -29   5   25.40   12.20
  -7  29   5   16.70   13.50
  -6 -29   5   -4.20    9.20
  -6  29   5   -7.50   10.60
  -5 -29   5   -0.70    7.60
  -5  29   5  -10.80    9.80
  -4 -29   5  281.07   36.60
  -4  29   5  307.37   39.60
   4  29  -5  344.87   43.30
  -3 -29   5  133.59   21.20
   3  29  -5  105.99   23.50
  -3  29   5   76.09   20.00
  -2 -29   5   15.00   10.00
   2  29  -5   26.00   14.20
  -2  29   5    2.50   12.50
  -1 -29   5    2.80    7.90
   1  29  -5   -5.80    9.90
  -1  29   5    3.40    5.40
  -1  29   5    0.70   10.90
   0 -29   5   53.59   12.60
   0  29  -5   64.69   16.60
   0  29   5   47.90   16.80
  -1  29  -5  168.38   25.50
   1  29   5  116.89   26.10
   2  29   5   25.60   16.70
  -2  29  -5   34.40   12.30
   3  29   5   40.20   20.70
  -3  29  -5   25.00   12.60
   4  29   5   37.60   20.50
  -4  29  -5    7.50   12.30
   5  29   5   53.39   22.60
  -5  29  -5   35.50   15.80
  -6  29  -5   18.60   12.70
   6  29   5  -17.60   17.30
  -7  29  -5   46.50   18.50
   7  29   5   18.80   21.90
  -8 -30   5   -1.50    9.10
  -8  30   5    4.10   11.40
  -7 -30   5   34.20   14.30
  -7  30   5    5.30   12.20
  -6 -30   5    3.60    9.20
  -6  30   5   34.60   14.70
  -5 -30   5   32.70   12.30
  -5  30   5   33.20   16.10
  -4 -30   5    2.60    8.80
   4  30  -5   18.30   15.40
  -4  30   5    7.30   10.90
  -3 -30   5   -3.60    8.70
   3  30  -5  -15.40   11.40
  -3  30   5   12.30   13.30
  -2 -30   5  133.39   20.90
   2  30  -5   80.29   20.10
  -2  30   5   88.69   21.10
  -1 -30   5   17.30    9.80
   1  30  -5    1.40   10.70
  -1  30   5   10.40   11.90
  -1  30   5   13.50    6.10
   0 -30   5  104.09   18.50
   0  30   5  106.59   25.60
   0  30  -5  127.49   22.50
  -1  30  -5   -1.90    9.50
   1  30   5   21.00   14.90
   2  30   5   14.20   14.10
  -2  30  -5   29.30   13.10
  -3  30  -5  125.29   22.10
   3  30   5  116.89   28.40
  -4  30  -5   60.69   17.60
   4  30   5    8.30   20.90
   5  30   5   -0.90   17.40
  -5  30  -5   11.10   14.00
   6  30   5  -19.90   15.60
  -6  30  -5    5.00   11.60
  -7  30  -5   14.30   15.90
   7  30   5   11.70   22.20
  -7 -31   5    1.40    8.60
  -7  31   5    0.20   10.90
  -6 -31   5   25.00   12.10
  -6  31   5    5.30   10.50
  -5 -31   5    6.20   10.90
  -5  31   5   28.30   14.60
  -4 -31   5   75.99   17.50
  -4  31   5   40.10   15.60
   4  31  -5   99.49   22.30
  -3 -31   5   20.10   10.60
  -3  31   5  -15.50    8.30
   3  31  -5   -4.70   12.00
  -2 -31   5    9.60    8.60
  -2  31   5    1.00   12.20
  -2  31   5   -5.00    5.60
   2  31  -5   -5.50   11.00
  -1 -31   5   20.70    9.60
  -1  31   5   44.30   13.00
  -1  31   5   53.69   17.60
   1  31  -5    5.50   11.10
   0 -31   5    6.00    8.00
   0  31   5   23.40   15.00
   0  31  -5   21.10   12.40
  -1  31  -5    5.80   11.00
   1  31   5    2.40   14.10
  -2  31  -5    5.40   10.90
   2  31   5    6.00   15.90
  -3  31  -5    7.70   10.20
   3  31   5  -13.20   14.50
   4  31   5   -6.50   15.80
  -4  31  -5   22.30   13.30
  -5  31  -5   -4.30   12.80
   5  31   5   17.60   18.50
  -6  31  -5   -1.20   10.60
   6  31   5    2.20   17.40
  -7 -32   5   -5.40   10.60
  -7  32   5   12.60   13.40
  -6 -32   5   11.90   10.80
  -6  32   5  -15.00   10.20
  -5 -32   5   41.80   13.60
  -5  32   5   24.20   12.80
  -4 -32   5    9.20    9.60
  -4  32   5   15.70   12.10
   4  32  -5   29.20   18.70
  -3 -32   5   -2.40    9.50
  -3  32   5   20.10   13.30
   3  32  -5   -6.60   12.20
  -2 -32   5    8.90    9.30
   2  32  -5   15.50   12.70
  -2  32   5   17.40   14.10
  -2  32   5    4.90    5.80
  -1 -32   5   -4.30    9.20
   1  32  -5   -7.20   10.70
  -1  32   5   13.20   14.00
   0  32   5   86.09   24.80
   0  32  -5   77.59   18.20
  -1  32  -5   32.00   13.10
   1  32   5   21.30   16.50
   2  32   5   12.50   18.00
  -2  32  -5   -2.40    9.40
  -3  32  -5    8.70   12.20
   3  32   5   10.30   18.00
   4  32   5   25.20   18.50
  -4  32  -5   46.30   16.70
  -5  32  -5  -22.50    9.80
   5  32   5    5.40   18.10
  -6  32  -5   16.00   14.50
   6  32   5   -4.30   19.40
  -7 -33   5   34.00   13.80
  -7  33   5   32.00   18.20
  -6 -33   5   30.00   13.80
  -6  33   5   23.70   14.10
  -5 -33   5   11.80   11.10
  -5  33   5   31.90   13.70
  -4 -33   5   45.10   15.10
  -4  33   5   64.09   17.90
  -3 -33   5  106.29   20.30
  -3  33   5   88.99   22.30
   3  33  -5  113.19   24.70
  -2 -33   5   94.19   17.70
   2  33  -5   81.29   21.60
  -2  33   5   57.79   19.30
  -2  33   5   62.19   12.30
  -1 -33   5    9.60    9.30
  -1  33   5   11.70   15.30
   1  33  -5  -13.40   10.00
   0  33   5    8.50   13.40
   0  33  -5   13.90   12.80
   1  33   5  112.19   27.50
  -1  33  -5  127.69   23.80
  -2  33  -5   46.00   15.60
   2  33   5   23.40   18.50
  -3  33  -5   22.30   14.50
   3  33   5    0.00   16.80
   4  33   5   51.19   24.10
  -4  33  -5   28.10   15.20
   5  33   5   26.60   20.20
  -5  33  -5   10.80   12.00
   6  33   5   -0.50   18.80
  -6  33  -5   11.80   14.60
  -7 -34   5   23.30   13.10
  -7  34   5   39.40   17.90
  -6 -34   5   21.60   13.20
  -6  34   5   38.70   16.70
  -5 -34   5   61.59   15.40
  -5  34   5   89.39   21.80
  -4 -34   5  102.79   20.20
  -4  34   5   79.79   19.80
  -3 -34   5   -0.50   10.20
   3  34  -5  -10.20   13.40
  -3  34   5   -0.60   11.00
  -2 -34   5   67.89   16.80
   2  34  -5   34.90   16.70
  -2  34   5   77.79   21.60
  -2  34   5   40.30   10.10
  -1 -34   5  158.68   22.60
   1  34  -5   81.29   21.50
  -1  34   5  114.49   27.00
   0  34  -5   12.80   13.60
   0  34   5   23.90   16.90
  -1  34  -5   -1.90   10.80
   1  34   5    2.20   13.40
  -2  34  -5    1.20   11.90
   2  34   5   38.80   21.10
   3  34   5   69.69   27.20
  -3  34  -5   96.99   20.30
  -4  34  -5   23.00   13.20
   4  34   5   27.00   19.30
   5  34   5   10.70   21.00
  -5  34  -5    6.60   12.30
   6  34   5   -1.00   20.90
  -6  34  -5   14.30   15.10
  -6 -35   5    0.20   11.70
  -6  35   5   17.80   13.20
  -5 -35   5    1.10   10.30
  -5  35   5   12.80   12.30
  -4 -35   5   64.49   17.80
  -4  35   5   65.79   20.00
  -3 -35   5   38.30   13.10
   3  35  -5   29.70   19.40
  -3  35   5   33.80   16.70
  -2 -35   5    5.60    9.60
  -2  35   5   35.90   16.50
   2  35  -5    9.90   14.80
  -1 -35   5   -5.70    8.20
  -1  35   5  -15.50   12.10
   1  35  -5   -5.40   12.20
   0  35   5   10.10   16.50
   0  35  -5   13.60   14.10
   1  35   5   36.30   20.60
  -1  35  -5   98.79   20.80
   2  35   5   77.19   26.30
  -2  35  -5   76.29   20.00
   3  35   5   -5.90   14.50
  -3  35  -5   16.80   14.00
  -4  35  -5  -17.50   11.10
   4  35   5   11.20   19.10
  -5  35  -5    5.30   13.00
   5  35   5   -3.90   16.50
  -6 -36   5   24.20   14.10
  -6  36   5    8.10   11.90
  -5 -36   5    4.90   11.80
  -5  36   5   -3.90   10.30
  -4 -36   5   21.20   12.50
  -4  36   5   12.40   14.20
  -3 -36   5  -10.70    9.30
   3  36  -5   26.70   17.30
  -3  36   5    5.30   12.50
  -2 -36   5   15.80   10.80
  -2  36   5   -7.70   11.90
   2  36  -5    0.30   14.90
  -1  36   5   44.00   19.70
   1  36  -5    9.90   13.90
   0  36   5   24.00   16.90
   0  36  -5  -11.50   12.30
   1  36   5    3.00   15.30
  -1  36  -5   25.80   14.50
  -2  36  -5   28.90   14.70
   2  36   5   42.30   22.20
   3  36   5   -3.50   15.70
  -3  36  -5   12.90   12.30
   4  36   5    6.10   18.30
  -4  36  -5   -0.20   12.60
   5  36   5  -13.60   19.90
  -5  36  -5    5.60   14.00
  -6 -37   5   -9.90    9.70
  -6  37   5   -0.90   12.30
  -5 -37   5    2.10   10.60
  -5  37   5   -4.40   10.60
  -4 -37   5   -3.30   10.80
  -4  37   5   -6.60   11.30
  -3 -37   5    3.10   10.90
  -3  37   5   -5.10   12.60
  -2 -37   5  -12.90    8.70
   2  37  -5    1.00   14.70
  -2  37   5    0.70   13.50
  -1  37   5   11.10   15.70
   1  37  -5   21.20   14.90
   0  37   5   -4.10   15.10
   0  37  -5  -16.60   10.40
   1  37   5   10.90   15.90
  -1  37  -5  -16.10   10.90
  -2  37  -5  -10.50   11.10
   2  37   5    3.80   16.50
  -3  37  -5   -5.90   11.80
   3  37   5   26.00   19.90
   4  37   5  -33.90   10.40
  -4  37  -5   -3.30   12.60
  -5  37  -5   -8.80   11.80
   5  37   5    6.90   20.20
  -5 -38   5   39.40   16.80
  -5  38   5   49.50   17.50
  -4 -38   5  -14.30    9.80
  -4  38   5    0.70   12.50
  -3 -38   5   15.90   11.50
  -3  38   5  -13.10   13.90
  -2 -38   5    6.50   10.10
  -2  38   5   -0.80   14.70
   2  38  -5   17.00   16.60
   1  38  -5   15.00   15.00
  -1  38   5   10.50   16.30
   0  38   5   16.10   17.70
   0  38  -5    8.80   13.30
   1  38   5   -0.70   15.60
  -1  38  -5   24.60   16.00
   2  38   5    2.70   15.70
  -2  38  -5   -9.70   10.10
  -3  38  -5    0.30   12.10
   3  38   5   -2.30   16.70
  -4  38  -5   33.00   16.50
   4  38   5   28.90   20.80
  -5 -39   5    2.20   12.00
  -5  39   5   28.10   15.60
  -4 -39   5   16.30   12.20
  -4  39   5   21.10   15.70
  -3 -39   5   67.39   18.10
  -3  39   5   35.50   17.90
   2  39  -5   38.00   19.70
  -2  39   5   12.00   15.80
  -1  39   5  -19.80   12.70
   1  39  -5   -4.80   13.70
   0  39   5   11.50   18.10
   0  39  -5    5.40   13.40
  -1  39  -5   20.10   15.60
   1  39   5   -3.40   14.30
   2  39   5   61.99   23.40
  -2  39  -5   69.49   20.60
   3  39   5    3.70   17.00
  -3  39  -5    9.30   14.00
   4  39   5  -15.20   15.80
  -4  39  -5    0.10   13.20
  -4 -40   5   14.50   11.90
  -4  40   5    1.70   15.20
  -3 -40   5    2.40   12.00
  -3  40   5   12.20   17.60
  -2  40   5   -8.50   14.30
   2  40  -5   -8.00   19.10
  -1  40   5   31.00   19.00
   1  40  -5   20.60   17.50
   0  40   5   12.60   16.30
   0  40  -5   13.90   14.80
  -1  40  -5   -4.00   13.90
   1  40   5   30.10   21.00
   2  40   5   39.10   22.40
  -2  40  -5    0.20   12.80
  -3  40  -5   10.60   15.70
   3  40   5  -15.40   15.00
  -4 -41   5   13.60   15.30
  -4  41   5   -1.10   16.40
  -3  41   5   10.20   14.70
  -2  41   5   -2.90   17.10
   1  41  -5  -18.00   12.90
  -1  41   5  -19.20   13.80
   0  41   5   -9.60   13.50
   0  41  -5   -9.00   14.30
  -1  41  -5   38.90   19.90
   1  41   5   23.80   21.00
  -2  41  -5   32.50   17.00
   2  41   5   43.30   23.10
  -3  41  -5    0.00   13.10
   3  41   5   -9.20   17.80
  -3  42   5    1.60   15.00
  -2  42   5    4.90   16.20
   1  42  -5    9.90   17.00
  -1  42   5    0.30   15.30
   0  42   5  -11.20   14.70
   0  42  -5    4.80   15.00
  -1  42  -5   12.30   16.10
   1  42   5   -1.00   17.60
   2  42   5  -32.60   16.10
  -2  42  -5    1.90   14.90
  -2  43   5  -18.20   13.40
   1  43  -5   20.00   21.80
  -1  43   5   13.40   17.70
   0  43   5    7.90   18.20
   0  43  -5  -13.70   15.10
  -1  43  -5    9.20   17.20
   1  43   5   24.80   22.60
   0  44  -5   50.49   21.00
  -9   0   6   77.99   15.60
  -8   0   6  262.87   26.90
  -7   0   6  188.78   20.90
   7   0  -6  168.88   28.30
   6   0  -6  598.44   61.19
  -6   0   6  656.23   56.59
  -5   0   6    4.80    4.50
  -4   0   6  377.76   35.00
  -4   0   6  387.06   34.80
  -3   0   6  279.17   26.60
  -3   0   6  297.07   26.10
  -2   0   6  320.47   26.60
  -2   0   6  287.27   28.00
  -1   0   6  394.26   35.60
  -1   0   6  406.06   34.70
   0   0   6  162.28   17.80
   0   0   6  145.79   15.20
   1   0   6  381.36   37.40
   1   0   6  379.26   34.10
   2   0   6 2954.90  253.77
   2   0   6 2977.80  249.48
   3   0   6   39.60   13.80
   3   0   6   38.60    7.30
   4   0   6   19.90   13.20
   4   0   6   24.80    7.10
   5   0   6  575.94   61.59
   5   0   6  456.95   43.60
   6   0   6  126.89   16.00
   6   0   6   77.89   23.90
   7   0   6   12.80   16.80
   7   0   6    0.10    6.50
   8   0   6    5.50   16.70
   9   0   6    0.40   18.10
  -9  -1   6    3.70    7.60
  -8  -1   6   35.20    9.50
  -8   1   6   96.19   12.60
  -7  -1   6   93.49   12.90
   7   1  -6   93.39   20.60
  -7   1   6   79.49   12.50
  -6  -1   6 1118.19   94.79
   6   1  -6 1113.09   99.29
  -6   1   6 1059.49   94.69
  -5  -1   6  158.68   18.90
   5   1  -6  200.78   24.20
  -5   1   6  184.48   19.50
  -5   1   6  173.68   18.40
  -4  -1   6   33.80    6.40
  -4   1   6   41.20    7.50
  -4   1   6   28.70    6.20
  -3  -1   6   14.80    4.10
  -3  -1   6   24.20    5.20
  -3   1   6   19.70    5.20
  -3   1   6   21.20    5.10
  -2  -1   6  863.81   73.89
  -2   1   6  868.21   72.69
  -2   1   6  847.62   73.89
  -1  -1   6  140.79   14.20
  -1   1   6  141.99   13.80
  -1   1   6  128.19   14.60
   0  -1   6  165.68   18.20
   0  -1   6  163.38   17.00
   0   1   6  187.38   19.80
   0   1   6  186.28   17.20
   1  -1   6  165.58   21.10
   1  -1   6  181.48   16.40
   1   1   6  142.49   15.90
   1   1   6  154.68   21.10
   2  -1   6    2.70    4.00
   2  -1   6   -4.00    7.50
   2   1   6   -6.70    8.00
   2   1   6   -1.00    3.80
   3  -1   6   -4.20    9.20
   3  -1   6    6.40    4.30
   3   1   6   17.20   11.10
   3   1   6   14.10    5.30
   4  -1   6  203.68   21.80
   4  -1   6  204.68   31.80
   4   1   6  216.78   21.60
   4   1   6  253.37   34.00
   5  -1   6  328.87   42.40
   5  -1   6  283.17   27.90
   5   1   6  301.77   42.00
   5   1   6  264.37   27.50
   6  -1   6   40.90   19.30
   6  -1   6   31.10    8.50
   6   1   6   29.20    8.10
   6   1   6   16.90   16.40
   7  -1   6   37.70    9.60
   7  -1   6   24.20   18.90
   7   1   6   31.70    9.40
   7   1   6   38.00   18.40
   8  -1   6    6.60   18.10
   8   1   6   33.20   19.40
   9  -1   6   83.89   28.30
   9   1   6   46.10   23.90
  -9  -2   6   22.20    9.60
  -9   2   6   17.80    7.90
  -8  -2   6   -2.60    4.50
  -8   2   6   11.00    6.40
  -8   2   6   -3.00    7.40
  -7  -2   6   13.40    5.90
   7   2  -6   -7.60   10.90
  -7   2   6    4.30    7.20
  -7   2   6   21.90    7.10
  -6  -2   6  361.06   32.90
   6   2  -6  366.96   41.20
  -6   2   6  327.27   34.70
  -6   2   6  354.66   33.20
  -5  -2   6    7.80    4.10
  -5   2   6    4.80    4.60
   5   2  -6   19.50    9.80
  -5   2   6   17.50    6.30
  -4  -2   6    5.10    3.90
   4   2  -6    6.10    6.20
  -4   2   6    2.50    4.70
  -4   2   6    4.70    3.70
  -3  -2   6    4.30    3.80
  -3  -2   6   11.30    3.70
  -3   2   6   10.90    4.30
  -3   2   6   10.80    4.60
  -2  -2   6  177.18   18.00
  -2   2   6  183.28   17.30
  -2   2   6  207.68   18.40
  -1  -2   6   55.09    7.60
  -1   2   6   38.90    7.10
  -1   2   6   62.69    8.20
   0  -2   6    4.10    3.60
   0  -2   6    4.20    5.20
   0   2   6    5.20    5.90
   0   2   6    6.20    3.80
   1  -2   6    6.60    7.50
   1  -2   6    3.00    4.00
   1   2   6   11.00    4.30
   1   2   6   15.00    7.90
   2  -2   6  568.94   50.59
   2  -2   6  494.25   45.60
   2   2   6  509.15   45.40
   2   2   6  511.25   50.29
   3  -2   6    4.40    4.20
   3  -2   6   -3.70    9.20
   3   2   6    5.00    4.10
   3   2   6    9.70   10.70
   4  -2   6   -7.10   10.40
   4  -2   6    2.70    5.10
   4   2   6    0.60    3.90
   4   2   6   -9.30   10.60
   5  -2   6  145.79   18.70
   5  -2   6  145.69   27.90
   5   2   6  149.79   28.70
   5   2   6  163.38   18.60
   6  -2   6    5.40    6.40
   6  -2   6   22.50   17.40
   6   2   6   -8.10    3.90
   6   2   6   26.20   17.50
   7  -2   6   -7.10    5.50
   7  -2   6   12.50   15.70
   7   2   6    1.80    6.10
   7   2   6   -1.50   13.10
   8  -2   6   12.90   19.10
   8   2   6   36.90   20.00
   9  -2   6   23.00   21.10
   9   2   6    5.80   19.40
  -9  -3   6   19.80    9.10
  -8  -3   6   54.69   13.00
  -8   3   6   64.49   15.10
  -7  -3   6  201.58   21.20
   7   3  -6  220.38   34.40
  -7   3   6  207.28   27.00
  -6  -3   6   21.90    5.70
  -6   3   6   18.50    8.30
  -6   3   6   13.20    5.50
   6   3  -6    5.40   10.20
  -5  -3   6   36.90    6.70
  -5   3   6   39.80    9.30
   5   3  -6   35.80   11.20
  -5   3   6   19.50    6.40
  -4  -3   6   12.80    4.30
   4   3  -6   21.10    7.90
  -4   3   6    7.40    4.50
  -4   3   6   16.40    5.60
  -3  -3   6    7.10    3.70
  -3   3   6    9.50    4.20
  -3   3   6    6.00    4.20
  -2  -3   6   24.70    5.00
  -2   3   6   20.10    4.90
  -2   3   6   12.80    4.30
  -1  -3   6   68.89    9.00
  -1   3   6   53.69    8.50
  -1   3   6   87.49   10.10
   0  -3   6   59.89    8.80
   0  -3   6   46.10    7.10
   0   3   6   41.50    9.30
   0   3   6   34.50    6.60
   1  -3   6   48.70   10.80
   1  -3   6   47.90    7.40
   1   3   6   38.80    6.70
   1   3   6   27.90   10.00
   2  -3   6    4.90    4.30
   2  -3   6   15.80   10.20
   2   3   6    7.60    4.10
   2   3   6   10.50    9.60
   3  -3   6   82.79   12.40
   3  -3   6  130.49   22.00
   3   3   6   94.49   19.20
   3   3   6  116.99   13.00
   4  -3   6   -3.50    3.90
   4  -3   6   -6.50   10.60
   4   3   6    5.40   12.40
   4   3   6    7.70    4.30
   5  -3   6   20.50    6.90
   5  -3   6   72.49   20.10
   5   3   6    2.30   12.60
   5   3   6   41.80    7.90
   6  -3   6   33.60    8.90
   6  -3   6   24.60   16.30
   6   3   6    5.10   13.80
   6   3   6   29.90    7.90
   7  -3   6   -9.80   12.70
   7  -3   6    9.10    6.70
   7   3   6   40.40   18.60
   7   3   6   19.00    8.60
   8  -3   6   32.30   19.60
   8   3   6   34.00   21.60
   9  -3   6   -7.10   17.40
   9   3   6    6.80   20.50
  -9  -4   6   19.50    9.90
  -8  -4   6  108.79   17.30
  -8   4   6   31.30   12.70
  -7  -4   6  141.59   16.90
  -7   4   6  138.39   21.00
  -6  -4   6   17.40    5.50
   6   4  -6   12.40   10.50
  -6   4   6   20.60    8.00
  -6   4   6   10.90    5.60
  -5  -4   6  124.29   15.10
  -5   4   6  129.99   17.50
  -5   4   6  138.19   16.20
   5   4  -6  154.58   20.60
  -4  -4   6  268.67   22.50
   4   4  -6  246.08   24.70
  -4   4   6  203.08   22.40
  -4   4   6  218.08   23.10
  -3  -4   6  748.53   63.29
  -3   4   6  686.73   63.49
   3   4  -6  756.62   63.29
  -2  -4   6  171.48   17.10
  -2   4   6  178.28   17.40
  -2   4   6  176.68   17.10
  -1  -4   6    1.00    3.20
  -1   4   6    4.50    3.70
  -1   4   6   -3.50    4.40
   0  -4   6   82.69   10.90
   0   4   6  100.19   13.80
   0   4   6  101.89   11.20
   1  -4   6  222.58   23.20
   1  -4   6  207.88   20.30
   1   4   6  199.28   20.10
   1   4   6  230.68   26.30
   2  -4   6  251.97   28.00
   2  -4   6  185.98   19.40
   2   4   6  207.18   26.30
   2   4   6  175.98   18.50
   3  -4   6  173.88   26.70
   3  -4   6  179.08   19.10
   3   4   6  150.88   17.90
   3   4   6  205.98   28.40
   4  -4   6    6.40    5.20
   4  -4   6   27.00   13.90
   4   4   6   20.50   13.40
   4   4   6   10.00    5.20
   5  -4   6    5.30    5.60
   5  -4   6   -2.50   12.20
   5   4   6    1.40    4.10
   5   4   6   22.30   14.80
   6  -4   6    0.60    6.10
   6  -4   6   20.50   15.40
   6   4   6   22.30    7.00
   6   4   6   14.70   16.40
   7  -4   6   76.49   25.10
   7   4   6   71.79   23.30
   8  -4   6   13.70   17.70
   8   4   6  -14.20   16.00
   9  -4   6   18.10   18.40
   9   4   6    7.40   17.80
  -9  -5   6  135.39   21.90
  -8  -5   6    7.90    7.00
  -8   5   6   -2.20    8.40
  -7  -5   6   81.79   11.40
  -7  -5   6   73.19   14.20
  -7   5   6   79.29   15.60
  -6  -5   6   37.90    7.00
  -6   5   6   27.10    9.00
   6   5  -6   56.79   14.50
  -5  -5   6  360.06   32.40
   5   5  -6  335.97   36.10
  -5   5   6  366.36   33.40
  -5   5   6  347.47   34.50
  -4  -5   6   43.30    7.30
  -4   5   6   61.59    9.70
  -4   5   6   47.10    8.50
   4   5  -6   53.09   10.60
  -3  -5   6    0.80    3.30
  -3   5   6   -0.60    3.60
  -3   5   6   -3.40    3.70
   3   5  -6    0.50    4.60
  -2  -5   6  195.48   17.40
  -2   5   6  182.88   17.80
  -2   5   6  158.68   17.50
  -1  -5   6 1303.27  109.69
  -1   5   6 1307.87  109.69
  -1   5   6 1261.97  110.29
   0  -5   6  103.19   12.10
   0   5  -6  106.19   10.90
   0   5   6   94.29   11.50
   0   5   6  100.79   14.90
   1  -5   6  142.49   14.30
   1  -5   6  138.19   18.00
   1   5   6  124.69   13.70
   1   5   6  137.49   19.30
   2  -5   6   25.30    9.80
   2  -5   6   23.50    4.20
   2  -5   6   23.60    5.80
   2   5   6    9.30    4.40
   2   5   6   13.30   10.40
   3  -5   6  311.47   28.40
   3  -5   6  285.37   36.10
   3   5   6  298.77   37.40
   3   5   6  288.77   27.50
   4  -5   6  568.44   58.49
   4  -5   6  555.34   50.89
   4   5   6  567.44   59.29
   4   5   6  571.74   50.29
   5  -5   6   74.09   21.60
   5  -5   6   85.79   13.10
   5   5   6  117.19   26.00
   5   5   6   90.09   12.20
   6  -5   6   -1.70    6.00
   6  -5   6   -4.10   14.40
   6   5   6   -5.00    4.80
   6   5   6   12.30   16.50
   7  -5   6   44.70   19.40
   7   5   6   -2.30   14.40
   8  -5   6   75.29   27.00
   8   5   6   51.59   22.10
   9  -5   6  148.59   37.50
   9   5   6  158.08   36.70
  -9  -6   6   55.19   13.90
  -8  -6   6  199.88   27.30
  -8   6   6  205.68   28.10
  -7  -6   6   88.89   17.10
  -7   6   6  119.59   19.00
  -6  -6   6    0.40    3.40
   6   6  -6    9.50   10.30
  -6   6   6    8.10    7.00
  -5  -6   6   89.19   11.10
   5   6  -6   82.19   15.30
  -5   6   6   67.49   12.90
  -5   6   6   95.29   12.30
  -4  -6   6  133.89   14.70
  -4   6   6  154.98   17.30
  -4   6   6  162.18   18.60
   4   6  -6  143.59   18.70
  -3  -6   6  651.43   53.69
  -3   6   6  585.34   54.19
   3   6  -6  609.44   54.09
  -3   6   6  620.14   54.39
  -2  -6   6    5.30    3.70
  -2   6   6    6.10    4.60
  -2   6   6    1.30    3.80
  -1  -6   6   67.29    9.10
   1   6  -6   68.69    7.20
  -1   6   6   81.29   11.20
  -1   6   6   77.09    9.90
   0  -6   6    6.70    4.40
   0   6  -6    9.00    4.00
   0   6   6   11.60    6.90
   0   6   6   12.10    4.10
   1  -6   6  146.19   18.20
   1  -6   6  152.38   15.60
   1   6   6  131.59   19.20
   1   6   6  112.59   14.10
   2  -6   6  381.66   39.20
   2  -6   6  371.36   35.10
   2  -6   6  389.86   33.70
   2   6   6  400.16   40.40
   2   6   6  382.56   34.60
   3  -6   6  168.88   27.60
   3  -6   6  198.48   20.30
   3   6   6  203.38   19.50
   3   6   6  189.88   28.00
   4  -6   6   11.50   12.00
   4  -6   6   10.70    5.60
   4   6   6   15.10    5.10
   4   6   6   22.50   13.60
   5  -6   6  169.28   30.20
   5  -6   6  173.78   20.60
   5   6   6  164.28   31.40
   5   6   6  162.78   18.70
   6  -6   6    1.60    5.50
   6  -6   6   15.80   15.80
   6   6   6    5.50   14.70
   6   6   6    0.40    4.80
   7  -6   6  137.59   31.40
   7   6   6  144.99   32.60
   8  -6   6   13.20   19.40
   8   6   6   -0.20   16.90
   9  -6   6   -6.20   19.20
   9   6   6   10.80   18.90
  -9  -7   6    4.70    7.80
  -8  -7   6   25.60   10.90
  -8   7   6   42.10   13.20
  -7  -7   6   -2.70    7.20
  -7   7   6   -1.40    7.10
  -6  -7   6    3.60    4.00
  -6  -7   6    2.00    7.10
   6   7  -6    1.10   10.10
  -6   7   6    1.20    5.90
  -5  -7   6    6.50    3.70
  -5   7   6    6.30    4.50
   5   7  -6   -0.30    8.00
  -5   7   6    7.40    6.10
  -4  -7   6   44.90    7.20
   4   7  -6   49.90   11.00
  -4   7   6   32.80    7.80
  -4   7   6   55.59    9.70
  -3  -7   6  204.48   17.50
   3   7  -6  185.58   18.50
  -3   7   6  142.19   18.10
  -3   7   6  165.78   18.40
  -2  -7   6   17.70    4.50
  -2   7   6   10.00    5.10
  -2   7   6   17.10    5.10
   2   7  -6   12.00    3.70
  -1  -7   6  850.71   75.39
   1   7  -6  884.11   74.29
  -1   7   6  865.31   76.69
  -1   7   6  915.51   75.59
   0  -7   6   80.79   11.20
   0   7  -6  101.99   11.10
   0   7   6  108.69   15.10
   0   7   6   95.39   11.30
   1  -7   6   38.70    7.40
   1  -7   6   28.80    5.80
   1   7   6   13.90    9.30
   1   7   6   34.40    6.10
  -1   7  -6   32.20    7.30
   2  -7   6  146.59   21.80
   2  -7   6  159.78   16.70
   2  -7   6  151.48   14.90
   2   7   6  161.58   24.20
   2   7   6  168.88   16.10
   3  -7   6  190.98   26.50
   3  -7   6  183.78   18.10
   3   7   6  144.99   16.50
   3   7   6  176.78   26.50
   4  -7   6   69.29   10.20
   4  -7   6   29.50   14.30
   4   7   6   60.69    8.90
   4   7   6   23.20   13.60
   5  -7   6   15.10   12.60
   5  -7   6    7.40    5.80
   5   7   6   -5.40   10.80
   5   7   6   -1.90    3.90
   6  -7   6   75.89   23.00
   6  -7   6   50.79   10.80
   6   7   6   61.59   21.10
   7  -7   6   34.00   20.20
   7   7   6   -1.60   14.50
   8  -7   6   18.20   18.30
   8   7   6   55.49   24.20
   9  -7   6   20.20   21.70
   9   7   6   23.90   19.20
  -9  -8   6   11.60    8.80
  -8  -8   6    6.00    7.30
  -8   8   6   15.00    9.90
  -7  -8   6   42.70   11.60
  -7   8   6   62.39   13.90
  -6  -8   6    4.20    7.10
  -6  -8   6   -1.10    3.40
   6   8  -6    8.70   12.20
  -6   8   6   -3.60    5.30
  -5  -8   6    9.10    4.10
  -5  -8   6    9.10    7.20
   5   8  -6   16.90    9.80
  -5   8   6   13.10    6.70
  -4  -8   6   18.20    4.50
  -4  -8   6   -6.90    5.00
  -4   8   6   13.10    6.30
  -4   8   6   27.30    6.90
   4   8  -6    5.40    7.40
  -3  -8   6   36.70    6.00
  -3   8   6   29.30    6.40
  -3   8   6   32.60    7.70
   3   8  -6   22.70    7.10
  -2  -8   6  138.39   13.30
   2   8  -6  137.99   13.30
  -2   8   6  118.69   15.30
  -2   8   6  107.59   14.00
  -1  -8   6    6.50    4.10
   1   8  -6   11.70    3.70
  -1   8   6   17.90    4.80
  -1   8   6   11.70    6.60
   0  -8   6    6.90    4.50
   0  -8   6    2.00    3.50
   0   8  -6    6.40    4.10
   0   8   6   -0.90    3.80
   0   8   6    3.60    6.80
   1  -8   6   89.89   11.20
   1  -8   6  102.69   12.20
   1   8   6   80.69   15.60
  -1   8  -6   86.99   12.20
   1   8   6   85.29   10.80
   2  -8   6   -1.50    2.50
   2  -8   6    3.30    4.20
   2   8   6   -1.90    3.20
   2   8   6    0.50    9.60
   3  -8   6    7.60   10.00
   3  -8   6    1.40    5.10
   3   8   6    4.60    3.70
   3   8   6    6.80   10.70
   4  -8   6   26.10   13.10
   4  -8   6   22.80    6.90
   4   8   6   29.40    6.30
   4   8   6    1.60   10.50
   5  -8   6   81.49   13.60
   5  -8   6   67.09   21.30
   5   8   6  122.39   25.60
   5   8   6   84.19   11.70
   6  -8   6   61.09   11.20
   6  -8   6   60.39   21.40
   6   8   6   31.90   19.50
   7  -8   6   11.80   16.20
   7   8   6  -10.60   13.50
   8  -8   6   13.20   18.40
   8   8   6   28.10   19.60
   9  -8   6  -12.90   14.50
   9   8   6   -1.80   17.10
  -9  -9   6   44.20   13.60
  -9   9   6   52.39   21.60
  -8  -9   6   -7.40    7.20
  -8   9   6   -4.90    8.20
  -7  -9   6   12.50    8.80
  -7   9   6   27.20   10.20
  -6  -9   6   13.60    4.90
  -6  -9   6   30.70   10.20
  -6   9   6   17.00    7.90
  -5  -9   6   43.80    7.00
  -5  -9   6   44.90   11.30
   5   9  -6   26.80   11.70
  -5   9   6   56.19   11.40
  -4  -9   6   79.19   10.20
  -4  -9   6   86.39   14.40
  -4   9   6   89.49   13.60
   4   9  -6  114.09   15.70
  -4   9   6   79.19   11.80
  -3  -9   6   11.00    6.20
  -3  -9   6    3.10    3.20
   3   9  -6    0.80    5.00
  -3   9   6    1.90    4.00
  -3   9   6   12.30    5.70
  -2  -9   6  137.99   17.10
  -2  -9   6  110.59   13.40
  -2   9   6  128.89   14.50
  -2   9   6  139.09   16.20
   2   9  -6  128.59   13.60
  -1  -9   6  340.37   33.00
  -1  -9   6  350.56   31.60
   1   9  -6  341.07   31.10
  -1   9   6  377.16   31.90
  -1   9   6  347.47   33.80
   0  -9   6  143.59   14.80
   0  -9   6  127.29   15.80
   0   9   6  132.49   14.20
   0   9   6  153.98   19.40
   0   9  -6  147.29   14.70
   1  -9   6   12.70    4.90
   1  -9   6   32.50    6.40
  -1   9  -6   24.10    6.70
   1   9   6   16.90    5.00
   1   9   6   19.10   10.10
   2  -9   6    1.70    3.10
   2  -9   6   -2.50    4.30
   2   9   6   -0.40    3.00
  -2   9  -6   -6.00    5.00
   2   9   6  -10.20    8.20
   3  -9   6  199.98   21.80
   3   9   6  235.08   32.00
   3   9   6  221.28   20.70
   4  -9   6  340.57   31.90
   4  -9   6  312.67   40.90
   4   9   6  322.57   30.30
   4   9   6  335.07   42.90
   5  -9   6   66.19   11.90
   5  -9   6   99.59   22.90
   5   9   6   82.19   21.10
   5   9   6   58.79    9.90
   6  -9   6   25.40   16.00
   6  -9   6   41.20   10.30
   6   9   6   55.99   21.90
   7  -9   6    6.30   17.90
   7   9   6   27.40   19.50
   8  -9   6   26.30   19.20
   8   9   6   21.60   20.70
   9   9   6   25.30   22.70
  -9 -10   6   20.30   10.70
  -9  10   6   32.80   14.10
  -8 -10   6   16.60   10.70
  -8  10   6   64.69   15.20
  -7 -10   6  300.47   35.70
  -7  10   6  314.77   37.00
  -6 -10   6   -3.20    6.80
  -6  10   6   -7.10    6.00
  -5 -10   6   28.10    5.50
  -5 -10   6    7.50    7.20
  -5  10   6   15.70    8.10
   5  10  -6   34.50   12.40
  -4 -10   6  201.88   24.20
  -4 -10   6  177.28   17.50
  -4  10   6  207.48   23.20
   4  10  -6  179.88   22.80
  -4  10   6  164.18   20.00
  -3 -10   6  102.29   14.80
  -3 -10   6   65.59    9.70
  -3  10   6  103.59   12.20
   3  10  -6   89.09   12.80
  -3  10   6  102.09   13.60
  -2 -10   6 1725.73  146.39
  -2 -10   6 1802.42  148.79
  -2  10   6 1776.22  147.09
  -2  10   6 1646.74  148.09
   2  10  -6 1724.23  146.69
  -1 -10   6   76.59   12.40
  -1 -10   6   79.39   10.40
   1  10  -6   83.39   10.20
  -1  10   6   87.49   10.90
  -1  10   6   80.39   13.20
   0 -10   6  126.69   14.90
   0 -10   6  104.19   12.90
   0  10   6  133.29   18.30
   0  10   6  105.69   12.60
   0  10  -6  111.19   13.40
   1 -10   6  463.05   40.60
   1 -10   6  444.76   40.20
  -1  10  -6  443.16   41.00
   1  10   6  444.56   44.70
   1  10   6  455.85   39.90
   2 -10   6  249.38   21.70
   2 -10   6  242.08   23.20
   2  10   6  218.18   22.10
   2  10   6  208.28   29.70
  -2  10  -6  245.48   25.20
   3 -10   6   32.90    7.90
   3  10   6   24.70    5.90
  -3  10  -6   24.20    8.80
   3  10   6   41.40   14.00
   4 -10   6    6.10    5.50
   4  10   6   11.40   13.40
   4  10   6   15.20    5.00
   5 -10   6   46.60   17.50
   5 -10   6   65.29   11.30
   5  10   6   58.49   19.70
   5  10   6   56.79   10.20
   6 -10   6  275.07   31.10
   6 -10   6  270.57   41.40
   6  10   6  325.47   46.20
   7 -10   6   85.99   25.10
   7  10   6  100.89   26.90
   8  10   6   -3.40   16.40
   9  10   6   -8.10   18.20
  -9  10  -6  -11.10   11.40
  -9 -11   6  111.09   20.10
  -9  11   6   87.19   20.30
  -8 -11   6    5.70    8.50
  -8  11   6   -3.60    8.20
  -7 -11   6   28.40   10.90
  -7  11   6    4.30    8.00
  -6 -11   6   -9.90    6.10
  -6  11   6   -0.50    7.20
  -5 -11   6  174.08   17.70
  -5 -11   6  181.88   23.40
  -5  11   6  211.68   24.60
   5  11  -6  178.98   25.60
  -4 -11   6   28.90    8.80
  -4 -11   6   29.60    5.40
  -4  11   6   13.50    7.70
   4  11  -6   33.50    9.70
  -4  11   6   36.30    7.30
  -3 -11   6   21.80    5.10
  -3 -11   6   33.70    9.30
   3  11  -6   20.90    7.40
  -3  11   6   39.10    7.20
  -3  11   6   31.20    8.30
  -2 -11   6  335.77   31.80
  -2 -11   6  337.87   29.50
   2  11  -6  320.67   30.10
  -2  11   6  309.77   31.70
  -2  11   6  316.37   29.90
  -1 -11   6  949.21   80.49
  -1 -11   6  953.20   82.09
  -1  11   6  906.51   80.59
   1  11  -6  956.30   80.39
  -1  11   6  923.91   82.89
   0 -11   6  440.96   41.20
   0 -11   6  501.95   42.20
   0  11   6  426.36   44.40
   0  11  -6  475.05   41.50
   0  11   6  464.45   41.00
   1 -11   6   14.20    4.90
   1 -11   6   27.50    6.00
   1  11   6   22.20   10.90
  -1  11  -6   25.80    6.90
   1  11   6    7.90    4.30
   2 -11   6  379.06   35.00
   2 -11   6  408.26   36.50
   2  11   6  428.56   42.80
  -2  11  -6  376.86   37.80
   2  11   6  410.86   35.50
   3 -11   6  228.08   25.40
  -3  11  -6  284.67   28.50
   3  11   6  269.37   24.30
   3  11   6  268.57   36.50
   4 -11   6  476.95   44.60
   4  11   6  470.25   55.99
  -4  11  -6  439.76   46.10
   4  11   6  518.05   43.20
   5 -11   6   31.00    9.10
   5  11   6   42.90   18.50
   6 -11   6    1.80    6.30
   6  11   6   -1.40   14.10
   7  11   6   15.90   17.50
   8  11   6   30.30   21.50
  -8  11  -6   93.99   20.10
   9  11   6   38.10   22.90
  -9  11  -6   59.49   21.10
  -9 -12   6   13.00    9.70
  -9  12   6    0.80    9.40
  -8 -12   6   51.59   13.30
  -8  12   6   32.20   13.30
  -7 -12   6   85.69   16.70
  -7  12   6   98.29   18.10
  -6 -12   6   -0.40    7.50
  -6  12   6   -9.10    6.40
  -5 -12   6    3.80    7.10
  -5 -12   6    6.50    3.60
  -5  12   6    0.60    6.70
   5  12  -6   -2.10    8.70
  -4 -12   6  102.79   18.10
  -4 -12   6  129.69   13.50
   4  12  -6  150.18   19.80
  -4  12   6  153.18   19.40
  -3 -12   6  546.55   50.79
  -3 -12   6  554.74   47.50
  -3  12   6  575.34   48.90
  -3  12   6  530.95   50.09
   3  12  -6  506.35   49.60
  -2 -12   6  126.39   16.90
  -2 -12   6   95.69   12.70
  -2  12   6  119.29   16.70
   2  12  -6  144.69   15.30
  -2  12   6  115.09   14.00
  -1 -12   6    2.10    3.80
  -1 -12   6   -0.80    5.20
  -1  12   6   -3.10    5.90
   1  12  -6   -1.30    4.20
  -1  12   6    0.40    4.20
   0 -12   6   -9.10    3.30
   0 -12   6    1.10    4.50
   0  12   6    6.80    7.70
   0  12  -6    5.60    4.60
   0  12   6    0.00    3.40
   1 -12   6    0.50    3.90
   1 -12   6    1.80    3.90
  -1  12  -6    0.10    5.10
   1  12   6   -8.40    7.30
   1  12   6    4.10    3.70
   2 -12   6  653.13   56.89
   2 -12   6  627.74   55.29
  -2  12  -6  613.34   57.99
   2  12   6  673.53   55.59
   2  12   6  607.94   61.69
   3 -12   6   14.40    6.50
   3  12   6    2.30   10.90
  -3  12  -6    3.60    7.20
   3  12   6    6.70    4.10
   4 -12   6   11.30    6.20
   4  12   6   17.80    5.20
   4  12   6   31.40   15.20
  -4  12  -6    2.20    8.30
   5 -12   6  107.99   16.20
   5  12   6  155.98   30.10
  -5  12  -6  118.69   20.90
   6 -12   6   94.29   15.80
  -6  12  -6  122.89   21.10
   6  12   6   62.29   22.20
  -7  12  -6   33.50   14.70
   7  12   6   34.50   20.70
  -8  12  -6    7.10   12.30
   8  12   6    8.60   18.50
   9  12   6  -18.20   15.90
  -9  12  -6    3.70   14.10
  -9 -13   6   12.90    9.90
  -9  13   6   18.30   12.60
  -8 -13   6   10.30    8.90
  -8  13   6   15.80   11.10
  -7 -13   6    4.80    8.60
  -7  13   6   36.90   12.80
  -6 -13   6    2.90    8.00
  -6  13   6   39.70   11.50
  -5 -13   6  187.78   23.60
  -5  13   6  149.39   21.60
   5  13  -6  129.39   25.10
  -4 -13   6   48.00   11.00
  -4 -13   6   28.80    5.60
   4  13  -6   27.50   10.10
  -4  13   6   34.90   10.00
  -3 -13   6    5.60    3.50
  -3 -13   6   14.80    7.90
   3  13  -6    5.70    6.60
  -3  13   6    2.50    6.20
  -3  13   6    3.00    4.80
  -2 -13   6   -2.40    5.50
  -2 -13   6   -2.10    2.90
  -2  13   6    8.50    6.30
   2  13  -6    5.90    5.10
  -2  13   6    4.40    4.10
  -1 -13   6   20.20    7.10
  -1 -13   6   16.00    4.60
   1  13  -6    2.00    4.50
  -1  13   6   13.90    8.00
  -1  13   6   10.70    4.80
   0 -13   6  172.78   18.10
   0 -13   6  148.39   16.80
   0  13   6  168.38   16.60
   0  13   6  191.78   24.10
   0  13  -6  175.98   17.90
   1 -13   6  278.67   25.70
   1 -13   6  286.37   26.00
   1  13   6  247.88   24.80
  -1  13  -6  257.37   26.90
   1  13   6  331.17   35.00
   2 -13   6   33.80    7.40
   2 -13   6   19.80    5.00
   2  13   6   49.99   14.60
   2  13   6   31.00    5.80
  -2  13  -6   21.40    8.50
   3 -13   6   39.00    7.90
  -3  13  -6   23.80    9.80
   3  13   6   34.10   14.70
   3  13   6   22.70    5.30
   4 -13   6   46.60    9.40
  -4  13  -6   52.29   13.80
   4  13   6   77.49   21.00
   4  13   6   31.60    6.60
   5 -13   6   42.40   10.00
  -5  13  -6   35.70   13.20
   5  13   6   47.70   18.30
   6 -13   6   -0.20    6.00
  -6  13  -6   11.20   10.90
   6  13   6   10.10   16.60
  -7  13  -6   -6.80    9.70
   7  13   6   27.80   21.30
  -8  13  -6  -16.80   10.30
   8  13   6   -1.30   18.40
  -9  13  -6   18.60   15.50
   9  13   6  -10.90   17.30
  -9 -14   6   29.10   11.40
  -9  14   6   45.60   15.60
  -8 -14   6   11.60    8.80
  -8  14   6   29.50   12.40
  -7 -14   6   20.30   10.70
  -7  14   6   16.30   10.50
  -6 -14   6    6.10    8.50
  -6  14   6    0.50    7.20
  -5 -14   6   54.69   12.40
   5  14  -6   17.40   18.60
  -5  14   6   33.70   10.50
  -4 -14   6  113.29   17.70
  -4 -14   6  110.79   12.40
   4  14  -6  103.09   17.60
  -4  14   6  100.39   16.70
  -3 -14   6   78.49    9.10
  -3 -14   6   75.09   13.10
   3  14  -6   66.09   12.30
  -3  14   6   58.49   10.20
  -3  14   6   58.99   12.10
  -2 -14   6   87.79   13.30
  -2 -14   6   76.59    9.80
  -2  14   6   75.79   13.20
  -2  14   6   76.99   10.60
   2  14  -6   66.49   11.40
  -1 -14   6    5.20    5.40
  -1 -14   6   15.00    4.80
  -1  14   6   10.10    4.70
  -1  14   6   10.20    7.80
   1  14  -6    4.30    4.90
   0 -14   6   24.20    6.30
   0 -14   6   33.10    7.20
   0  14   6   17.10   10.00
   0  14   6   25.70    5.80
   0  14  -6   25.30    6.90
   1 -14   6  244.88   22.70
   1 -14   6  228.48   22.80
  -1  14  -6  216.58   23.60
   1  14   6  288.97   32.50
   1  14   6  218.28   21.60
   2 -14   6   15.50    4.50
   2 -14   6    8.40    5.20
  -2  14  -6    6.20    7.00
   2  14   6   23.40   12.30
   2  14   6    5.90    4.00
   3 -14   6  142.79   17.40
   3  14   6  146.89   25.90
  -3  14  -6  158.58   21.30
   3  14   6  122.59   14.60
   4 -14   6    2.40    5.60
  -4  14  -6   -5.70    6.90
   4  14   6    2.90   13.50
   5 -14   6   32.90    9.00
  -5  14  -6   22.30   11.20
   5  14   6    2.90   12.40
  -6  14  -6   49.90   15.40
   6  14   6   44.70   20.10
   7  14   6   12.90   18.10
  -7  14  -6    8.00   13.30
   8  14   6  -28.50   15.20
  -8  14  -6  -14.80   12.10
  -9 -15   6   24.00   10.80
  -9  15   6   36.40   14.80
  -8 -15   6   21.30   10.20
  -8  15   6   26.20   12.70
  -7 -15   6   78.29   16.60
  -7  15   6  126.79   20.70
  -6 -15   6    1.00    7.40
  -6  15   6   13.80    9.00
  -5 -15   6   49.20   11.40
  -5  15   6   12.30    9.20
  -4 -15   6  352.06   38.00
  -4 -15   6  394.76   33.90
  -4  15   6  368.66   37.90
   4  15  -6  385.66   38.80
  -3 -15   6   35.60   10.60
  -3 -15   6   30.00    5.60
   3  15  -6   32.80    9.30
  -3  15   6   31.40    7.30
  -3  15   6   17.90    8.10
  -2 -15   6  397.26   39.10
  -2 -15   6  397.66   36.40
   2  15  -6  374.26   38.20
  -2  15   6  427.26   37.40
  -2  15   6  468.35   40.80
  -1 -15   6   66.49   11.00
  -1 -15   6   51.09    8.10
  -1  15   6   53.79    8.50
  -1  15   6   74.09   14.30
   1  15  -6   54.29    9.70
   0 -15   6   27.30    5.90
   0 -15   6   23.60    7.00
   0  15   6   22.60   10.80
   0  15   6   16.10    5.30
   0  15  -6   16.30    6.70
   1 -15   6   57.09    9.40
   1 -15   6   50.29    8.70
   1  15   6   55.39    8.00
  -1  15  -6   78.59   12.10
   1  15   6   48.40   13.30
   2 -15   6   66.99   10.20
   2 -15   6   76.79   11.50
  -2  15  -6   90.49   14.40
   2  15   6   58.59   17.20
   2  15   6   96.39   10.50
   3 -15   6  477.95   43.10
   3  15   6  460.25   41.00
  -3  15  -6  440.56   45.20
   3  15   6  492.75   51.59
   4 -15   6   89.69   14.00
   4  15   6   73.99   22.10
  -4  15  -6   95.09   18.00
   5 -15   6   -3.80    5.40
   5  15   6  -11.40   12.70
  -5  15  -6   -0.90    8.00
   6  15   6   -1.50   14.60
  -6  15  -6   -2.10   10.60
   7  15   6   22.70   18.80
  -7  15  -6   52.39   17.20
   8  15   6   95.39   29.80
  -8  15  -6  121.69   25.80
  -9 -16   6   83.69   18.10
  -9  16   6   81.19   19.40
  -8 -16   6   71.89   16.40
  -8  16   6  140.89   23.20
  -7 -16   6   49.30   13.70
  -7  16   6   35.40   12.60
  -6 -16   6  209.08   27.50
  -6  16   6  183.98   27.10
  -5 -16   6   16.00    8.50
  -5  16   6    8.20    8.60
  -4 -16   6  323.47   34.00
  -4  16   6  327.57   33.80
   4  16  -6  318.97   36.90
  -3 -16   6  272.17   26.20
  -3 -16   6  327.17   30.70
   3  16  -6  283.37   32.10
  -3  16   6  289.07   27.90
  -3  16   6  286.87   30.50
  -2 -16   6  445.46   42.00
  -2 -16   6  487.55   45.30
  -2  16   6  485.25   43.30
  -2  16   6  524.65   46.70
   2  16  -6  476.55   44.50
  -1 -16   6    1.40    5.70
  -1 -16   6    2.30    3.70
   1  16  -6   -1.80    4.90
  -1  16   6    3.40    3.90
  -1  16   6    9.00    8.60
   0 -16   6   97.99   12.30
   0 -16   6   71.99   12.40
   0  16   6  106.49   11.80
   0  16   6   74.19   16.10
   0  16  -6   86.19   13.00
   1 -16   6  220.68   22.80
   1 -16   6  215.38   22.70
   1  16   6  227.28   21.80
   1  16   6  333.67   34.90
  -1  16  -6  239.88   26.60
   2 -16   6  123.19   14.90
   2 -16   6  102.59   13.10
   2  16   6   78.69   19.20
   2  16   6  125.69   13.00
  -2  16  -6   98.99   16.20
   3 -16   6  547.15   48.40
   3  16   6  510.55   55.89
   3  16   6  533.25   46.10
  -3  16  -6  490.95   50.19
   4 -16   6   -8.60    5.00
   4  16   6    2.80   12.10
  -4  16  -6    7.00    9.00
   5 -16   6   44.40   10.30
   5  16   6   31.30   16.30
  -5  16  -6   18.00   11.30
   6  16   6  119.39   28.80
  -6  16  -6  110.59   21.30
  -7  16  -6   27.10   14.30
   7  16   6   37.10   22.20
   8  16   6   43.00   22.90
  -8  16  -6   21.70   17.00
  -9 -17   6   43.60   14.70
  -9  17   6   54.89   16.80
  -8 -17   6   21.10   10.20
  -8  17   6   30.90   13.50
  -7 -17   6   29.50   11.30
  -7  17   6   32.30   12.50
  -6 -17   6   51.59   13.60
  -6  17   6   63.69   14.90
  -5 -17   6  117.79   20.20
  -5  17   6  140.39   21.20
  -4 -17   6  128.29   18.90
  -4  17   6   84.49   16.00
   4  17  -6  112.39   18.90
  -3 -17   6   16.60    7.60
  -3 -17   6    2.80    3.30
  -3  17   6    5.60    5.10
   3  17  -6    3.90    7.10
  -3  17   6    8.20    7.20
  -2 -17   6   92.19   14.30
  -2 -17   6  104.69   11.40
  -2  17   6   86.69   16.10
  -2  17   6   98.29   12.80
   2  17  -6   63.49   13.00
  -1 -17   6   70.99    9.40
  -1 -17   6   47.20   10.30
   1  17  -6   57.79   10.70
  -1  17   6   48.20   12.40
  -1  17   6   57.09    9.00
   0 -17   6   63.79    9.50
   0 -17   6   53.49   10.30
   0  17  -6   63.39   11.00
   0  17   6   70.39    9.40
   0  17   6   50.29   14.50
   1 -17   6   36.40    8.10
   1 -17   6   35.30    8.40
   1  17   6   41.50    7.10
  -1  17  -6   47.00   10.60
   1  17   6   33.80   13.50
   2 -17   6   29.20    6.50
   2 -17   6   21.70    6.50
  -2  17  -6   12.30    8.80
   2  17   6   20.80    5.20
   2  17   6   28.10   13.90
   3 -17   6   14.30    6.30
  -3  17  -6    0.60    8.10
   3  17   6   16.10   11.80
   4 -17   6  121.19   16.40
  -4  17  -6   97.89   18.20
   4  17   6   74.99   22.50
   5 -17   6   84.29   15.30
  -5  17  -6  125.29   21.20
   5  17   6  119.79   28.90
  -6  17  -6   21.50   13.30
   6  17   6   13.90   14.70
   7  17   6   36.70   20.00
  -7  17  -6   28.40   14.70
   8  17   6   82.79   30.00
  -8  17  -6   39.20   16.50
  -9 -18   6    1.70    9.40
  -9  18   6   33.80   13.20
  -8 -18   6   -7.60    8.10
  -8  18   6   11.10   10.90
  -7 -18   6   10.30    9.90
  -7  18   6   14.00   11.40
  -6 -18   6   -3.90    8.00
  -6  18   6   -6.00    7.50
  -5 -18   6   -1.50    6.80
  -5  18   6   -2.20    7.10
  -4 -18   6  -15.70    5.70
   4  18  -6   -8.90    8.50
  -4  18   6   10.30    8.90
  -3 -18   6   -1.80    6.60
  -3 -18   6    4.70    3.40
  -3  18   6    7.50    7.80
  -3  18   6   10.10    5.80
   3  18  -6    1.60    7.80
  -2 -18   6   32.30    6.30
  -2 -18   6   27.90    9.40
  -2  18   6   47.00   12.70
   2  18  -6   31.70    9.80
  -2  18   6   39.90    8.00
  -1 -18   6    0.10    3.60
  -1 -18   6   -1.70    5.40
  -1  18   6   -8.10    7.30
   1  18  -6   -1.70    5.50
  -1  18   6   -9.70    3.50
   0 -18   6   15.40    7.00
   0 -18   6   38.60    7.30
   0  18   6   40.40   12.70
   0  18   6   38.90    6.70
   0  18  -6   37.10    9.10
   1 -18   6   63.49   10.00
   1 -18   6   40.40    9.00
   1  18   6   60.19   15.40
  -1  18  -6   63.79   12.30
   1  18   6   61.39    8.40
   2 -18   6   22.90    6.30
   2 -18   6   12.10    6.00
  -2  18  -6   24.30    9.60
   2  18   6   10.00   13.60
   2  18   6   23.00    5.20
   3 -18   6   65.09   11.90
   3  18   6   72.79   19.60
  -3  18  -6   70.39   14.40
   4 -18   6   -4.00    5.30
   4  18   6  -13.90   12.60
  -4  18  -6    6.40    9.10
   5 -18   6   -1.50    6.00
  -5  18  -6   -6.80    9.20
   5  18   6   12.90   16.10
  -6  18  -6    0.20   11.10
   6  18   6    4.20   13.60
   7  18   6  -10.00   15.70
  -7  18  -6   16.10   12.60
  -8  18  -6  -12.50   11.40
   8  18   6   15.60   20.50
  -9 -19   6    9.90    9.70
  -9  19   6    8.10   11.10
  -8 -19   6    1.40    9.10
  -8  19   6    8.10   10.50
  -7 -19   6   15.50   10.10
  -7  19   6    7.10   10.10
  -6 -19   6   84.49   17.40
  -6  19   6   86.09   18.00
  -5 -19   6   -0.50    7.90
  -5  19   6   -0.60    7.70
  -4 -19   6   -8.00    5.70
  -4  19   6  -15.00    6.90
   4  19  -6    0.80   10.40
  -3 -19   6   50.99    7.60
  -3 -19   6   61.49   12.50
  -3  19   6   75.39   14.80
  -3  19   6   38.10    8.80
   3  19  -6   44.00   12.10
  -2 -19   6   37.70   11.10
  -2 -19   6   70.69    9.20
   2  19  -6   55.39   12.10
  -2  19   6   71.59   10.80
  -2  19   6   60.09   14.80
  -1 -19   6   42.60    7.20
  -1 -19   6   26.70    9.10
  -1  19   6   32.30    7.00
   1  19  -6   31.50    9.50
  -1  19   6   22.10   11.20
   0 -19   6   17.90    6.30
   0 -19   6   21.80    7.30
   0  19  -6   39.50    9.50
   0  19   6   54.79   14.80
   0  19   6   33.70    6.80
   1 -19   6   69.09   10.90
[truncated: 318,086 more chars]
